# Supplementary material for: A Molecular Function Map of Ewing's Sarcoma
Source: PLoS One. 2009 Apr 30;4(4):e5415. doi: 10.1371/journal.pone.0005415 (PMC2671847; doi:10.1371/journal.pone.0005415)
Supplement: Table S1 — Differential expression - genelists. List of differential expression values and annotation (ΔKD-ΔET) for all genes/probesets and for subsets meeting significance level cutoffs (GS1, GS2). (2.18 MB XLS) [file pone.0005415.s003.xls]

## Sheet: all genes
Gene_Symbol	affyID_hgu133a	EntrezGeneID	deltaKD	P.Value.KD	adj.P.Val.KD	deltaET	P.Value.ET	adj.P.Val.ET	quad	deltaSum	EWS-FLI1 induced or repressed	HancockUP	HancockDOWN	GangwalChIP
RND3	212724_at	390	4.82312	1.37478e-05	0.00657538	-6.71863	2.17422e-10	2.31719e-08	4	11.5418	repr
PRKCB1	207957_s_at	5579	-4.03434	0.000347599	0.0153488	7.27741	2.4428e-08	1.3424e-06	1	11.3117	IND	PRKCB1
PTX3	206157_at	5806	4.44734	4.50151e-07	0.00265296	-5.9198	8.16796e-11	1.03776e-08	4	10.3671	repr			PTX3
LOX	204298_s_at	4015	5.68551	6.95105e-05	0.00991172	-4.15261	2.61852e-08	1.40223e-06	4	9.83812	repr		LOX
NR0B1	206645_s_at	190	-3.43272	2.00835e-05	0.00762237	6.25909	6.5003e-11	8.46724e-09	1	9.69181	IND	NR0B1		NR0B1
NKX2-2	206915_at	4821	-1.99842	0.000805807	0.0206111	7.62184	2.35255e-22	4.13696e-19	1	9.62025	IND	NKX2-2
BCL11B	219528_s_at	64919	-3.63525	0.00012217	0.0108146	5.93425	1.61928e-13	5.17729e-11	1	9.5695	IND
KMO	211138_s_at	8564	-3.63767	0.0112095	0.0704626	5.80529	1.55046e-12	3.77167e-10	1	9.44297	IND	KMO
OPN3	205306_x_at	23596	-3.37612	0.0124485	0.0752902	6.06436	8.95806e-13	2.4235e-10	1	9.44048	IND
PPP1R1A	205478_at	5502	-4.64058	2.25669e-06	0.00265296	4.76416	6.9003e-07	2.18634e-05	1	9.40475	IND	PPP1R1A
TFPI2	209278_s_at	7980	3.85373	0.0226494	0.104458	-5.41785	8.12814e-06	0.000172209	4	9.27158	repr		TFPI2
ADM	202912_at	133	3.68897	8.75969e-05	0.00991172	-5.42627	2.26697e-07	8.90831e-06	4	9.11524	repr		ADM
PKP1	221854_at	5317	-2.02479	0.0192958	0.0951548	7.08	3.92321e-11	5.30689e-09	1	9.10478	IND
DAPK1	203139_at	1612	-2.32334	0.00128413	0.0257338	6.54312	6.13119e-13	1.72507e-10	1	8.86645	IND	DAPK1
CCK	205827_at	885	-4.1169	0.00200714	0.0310975	4.72963	0.000448553	0.00445638	1	8.84654	IND	CCK
TAGLN	205547_s_at	6876	4.99416	0.00226992	0.0327857	-3.79786	0.00977474	0.0459903	4	8.79202	repr
DAB2	210757_x_at	1601	3.45836	0.0226359	0.104458	-5.14463	1.71105e-05	0.00032884	4	8.603	repr
SRPX	204955_at	8406	1.86247	0.00165212	0.0284481	-6.53774	1.72215e-08	9.96363e-07	4	8.40021	repr		SRPX
GPR64	206002_at	10149	-0.766995	0.11514	0.271777	7.60307	6.51336e-16	4.5815e-13	1	8.37006	IND
GADD45B	207574_s_at	4616	2.09444	5.42358e-05	0.00991172	-6.18671	1.43069e-10	1.67724e-08	4	8.28114	repr
TRPM4	219360_s_at	54795	-3.83342	7.23637e-05	0.00991172	4.36106	1.38393e-10	1.64993e-08	1	8.19448	IND
PHLDA1	217996_at	22822	3.43638	0.00105084	0.0231752	-4.75433	3.04104e-07	1.12583e-05	4	8.19071	repr
THBS1	201109_s_at	7057	4.34289	0.00180436	0.0297967	-3.71996	0.000179727	0.0021709	4	8.06286	repr
FNDC3B	218618_s_at	64778	3.93852	2.1269e-06	0.00265296	-4.09435	1.57784e-05	0.000305745	4	8.03287	repr
DNAJC12	218976_at	56521	-2.45222	0.00252973	0.03519	5.50162	3.26496e-11	4.68689e-09	1	7.95384	IND	DNAJC12
CFD	205382_s_at	1675	-0.703922	0.0264738	0.11502	-7.21944	8.23643e-09	5.36435e-07	3	7.92336	repr
TPM1	210987_x_at	7168	4.25924	0.00027322	0.0137606	-3.65199	0.000582183	0.00552642	4	7.91123	repr		TPM1
ADAMTS1	222162_s_at	9510	2.23055	0.00984021	0.0662989	-5.6301	1.999e-07	8.09071e-06	4	7.86066	repr
SLC24A3	219090_at	57419	-2.86213	0.00247971	0.0347425	4.95823	2.59141e-08	1.40215e-06	1	7.82036	IND	SLC24A3
CYR61	210764_s_at	3491	4.01657	6.26857e-05	0.00991172	-3.78984	0.00130503	0.0103304	4	7.80641	repr		CYR61
AKAP7	205771_s_at	9465	-3.34718	0.00016449	0.0114732	4.45334	1.0097e-15	6.45655e-13	1	7.80052	IND	AKAP7
MAFF	36711_at	23764	1.61178	0.0182538	0.0927726	-5.99209	2.9993e-08	1.55125e-06	4	7.60388	repr
IGFBP6	203851_at	3489	0.960548	0.107584	0.262435	-6.62497	4.47873e-11	5.94404e-09	4	7.58552	repr		IGFBP6
CTGF	209101_at	1490	4.04819	3.0173e-06	0.00265296	-3.49021	0.00246557	0.0166918	4	7.53839	repr
ARHGAP29	203910_at	9411	4.5916	0.000299405	0.0140401	-2.9436	0.000480852	0.00471731	4	7.5352	repr		ARHGAP29
PMP22	210139_s_at	5376	3.19622	0.000416369	0.0163617	-4.33788	0.00114952	0.00934769	4	7.53411	repr		PMP22
DKK1	204602_at	22943	5.20502	0.0055576	0.049066	-2.32801	0.000591633	0.00557101	4	7.53303	repr		DKK1
NUSAP1	218039_at	51203	-2.98109	0.0056128	0.0494123	4.26578	1.50911e-05	0.000294864	1	7.24687	IND
MAPT	206401_s_at	4137	-3.03638	0.000429758	0.0163618	4.20914	1.8049e-06	4.86423e-05	1	7.24552	IND	MAPT
PTGER3	210832_x_at	5733	-3.52437	0.00193073	0.0306785	3.66144	2.8154e-09	2.06287e-07	1	7.18582	IND	PTGER3
FBLN5	203088_at	10516	1.59492	0.0103769	0.0677725	-5.55605	2.16768e-15	1.23491e-12	4	7.15096	repr
CCL2	216598_s_at	6347	1.95826	0.00198157	0.0309472	-5.17933	1.07142e-06	3.1799e-05	4	7.13759	repr		CCL2
FER1L3	201798_s_at	26509	2.25413	0.000506369	0.0170891	-4.86973	5.55151e-06	0.00012556	4	7.12386	repr		FER1L3
ATF3	202672_s_at	467	2.24953	0.00580123	0.05013	-4.86057	1.97033e-05	0.000365681	4	7.1101	repr
EPAS1	200878_at	2034	3.9814	0.000278002	0.0137606	-3.0703	0.0140484	0.0599978	4	7.05169	repr
RAMP1	204916_at	10267	-2.40742	0.0071736	0.0563789	4.64362	9.30716e-11	1.14854e-08	1	7.05104	IND
IGFBP3	210095_s_at	3486	2.17694	0.00610076	0.051827	-4.82836	0.000111304	0.00148279	4	7.0053	repr		IGFBP3	IGFBP3
RFTN1	212646_at	23180	3.12963	0.00807706	0.0600435	-3.87283	7.37131e-05	0.00106468	4	7.00246	repr
OLFM1	213131_at	10439	-1.76259	0.00637926	0.0526325	5.22501	6.64525e-05	0.000990749	1	6.9876	IND	OLFM1
AMIGO2	222108_at	347902	3.02535	0.00214123	0.0318422	-3.95827	2.0014e-07	8.09071e-06	4	6.98363	repr
IER3	201631_s_at	8870	1.11155	0.035444	0.136644	-5.84233	5.41608e-05	0.000831807	4	6.95387	repr
CCND1	208711_s_at	595	-2.84205	0.000544574	0.0174711	4.10056	3.57849e-11	4.93552e-09	1	6.9426	IND
AKR1C1	216594_x_at	1645	1.58411	0.0666507	0.198485	-5.35186	6.53332e-07	2.08888e-05	4	6.93597	repr
PHLDA2	209803_s_at	7262	1.68494	0.00812177	0.0601987	-5.25089	2.81422e-11	4.21175e-09	4	6.93583	repr
CLEC11A	205131_x_at	6320	-2.26849	0.0601781	0.186935	4.65977	2.56253e-07	9.84965e-06	1	6.92826	IND	CLEC11A
FCGRT	218831_s_at	2217	-3.4406	2.24578e-05	0.00762237	3.46293	5.53836e-07	1.81194e-05	1	6.90353	IND	FCGRT		FCGRT
SORD	201562_s_at	6652	-2.66136	7.75902e-06	0.00514564	4.22763	5.00413e-09	3.45088e-07	1	6.88899	IND	SORD
CALCB	214636_at	797	-1.55485	0.0283683	0.119558	5.25981	1.28299e-11	2.1487e-09	1	6.81465	IND
POM121L1	213089_at	25812	-0.55803	0.0317204	0.127717	6.21901	2.28232e-15	1.23491e-12	1	6.77704	IND
AMOTL2	203002_at	51421	2.02493	0.00222847	0.0323865	-4.75198	2.45947e-13	7.52171e-11	4	6.77692	repr
HMOX1	203665_at	3162	3.34274	0.0431699	0.152715	-3.43005	7.25398e-05	0.00105205	4	6.77278	repr
TRAM2	202369_s_at	9697	3.20453	0.00426484	0.0424913	-3.56255	3.35793e-08	1.69926e-06	4	6.76708	repr		TRAM2
RGS4	204337_at	5999	3.76925	0.00412347	0.0420355	-2.99077	0.0532031	0.158276	4	6.76002	repr
NFIL3	203574_at	4783	1.64912	0.00146204	0.0272064	-5.10885	8.89194e-08	3.98436e-06	4	6.75796	repr		NFIL3
SV2B	205551_at	9899	-4.38823	0.00204639	0.0312961	2.29782	0.0610442	0.174902	1	6.68605	IND
C17orf91	214696_at	84981	2.45906	7.14857e-05	0.00991172	-4.20786	2.34086e-08	1.2965e-06	4	6.66692	repr
IL8	202859_x_at	3576	1.70029	0.135812	0.299655	-4.96544	0.000217943	0.00252556	4	6.66573	repr		IL8
RHOH	204951_at	399	-4.04522	0.000150235	0.0114732	2.59111	0.0109683	0.0500008	1	6.63632	IND	RHOH		RHOH
P4HA2	202733_at	8974	2.64381	0.0145686	0.081963	-3.97795	6.39489e-06	0.000142347	4	6.62176	repr		P4HA2
RCAN1	208370_s_at	1827	3.48294	0.000957338	0.0220784	-3.08877	1.32562e-06	3.79041e-05	4	6.57171	repr
C6orf145	212923_s_at	221749	2.39899	1.27601e-05	0.00657538	-4.15583	2.03035e-08	1.1611e-06	4	6.55483	repr
TNFRSF12A	218368_s_at	51330	3.42519	0.000249992	0.0131227	-3.04139	1.50767e-06	4.1923e-05	4	6.46657	repr
HBA2	217414_x_at	3040	-1.92622	0.0859542	0.22919	4.51563	0.0266405	0.0955092	1	6.44186	IND
GPNMB	201141_at	10457	2.48581	0.00293977	0.0369791	-3.95198	0.00184029	0.0132902	4	6.43779	repr
NPTXR	213040_s_at	23467	-2.06898	0.00421613	0.0422924	4.36391	8.69425e-08	3.97112e-06	1	6.43289	IND
PPP1R15A	202014_at	23645	2.38227	0.00762582	0.0581688	-4.04763	8.0403e-07	2.4805e-05	4	6.4299	repr
CXCL12	209687_at	6387	-0.283874	0.530239	0.69597	-6.09851	6.48116e-07	2.08167e-05	3	6.38238	repr		CXCL12
KIT	205051_s_at	3815	-1.86184	0.0233219	0.106355	4.51789	6.29458e-08	2.97155e-06	1	6.37973	IND
STARD13	213103_at	90627	-1.88372	0.0391254	0.144239	4.48831	4.89018e-12	9.29664e-10	1	6.37202	IND
TMEM194	212621_at	23306	-2.74021	0.000582143	0.0178795	3.62491	2.34334e-11	3.58327e-09	1	6.36511	IND
CDKN3	209714_s_at	1033	-2.87427	0.00398101	0.0419118	3.48336	0.000662025	0.00606339	1	6.35763	IND	CDKN3
MMP2	201069_at	4313	2.54273	0.000624132	0.0179924	-3.81272	0.000750447	0.00662314	4	6.35545	repr
NT5E	203939_at	4907	2.41317	0.00399732	0.0419118	-3.90825	4.87849e-14	1.71576e-11	4	6.32142	repr		NT5E
PCSK2	204870_s_at	5126	-4.12648	0.00140997	0.0268867	2.18076	0.0264588	0.0951078	1	6.30724	IND
BHLHB2	201170_s_at	8553	1.18386	0.0659283	0.197588	-5.09322	3.24774e-07	1.17756e-05	4	6.27708	repr		BHLHB2
FADS1	208963_x_at	3992	-1.60015	0.00025212	0.0131364	4.66652	2.07778e-09	1.5886e-07	1	6.26667	IND	FADS1
GAS1	204456_s_at	2619	-3.29165	0.0416179	0.149699	2.97208	0.000245553	0.00276355	1	6.26372	IND	GAS1
IGFBP7	201162_at	3490	3.60425	0.0131837	0.0778623	-2.63559	0.0498487	0.150617	4	6.23984	repr
SERTAD2	202656_s_at	9792	2.13005	2.43481e-05	0.00762237	-4.10626	4.23536e-06	9.99715e-05	4	6.23631	repr
GYG2	210963_s_at	8908	-3.29529	0.00134499	0.0263527	2.93735	0.00030296	0.00325346	1	6.23263	IND	GYG2
FBN1	202766_s_at	2200	2.90498	0.000832935	0.0208253	-3.31476	0.000279517	0.00308169	4	6.21975	repr		FBN1
MAGED4B	221261_x_at	81557	1.35114	0.00381872	0.041452	4.85958	1.15502e-11	2.03111e-09	2	6.21073	IND
STEAP1	205542_at	26872	-3.19483	7.19068e-06	0.00514564	3.01418	7.4277e-07	2.31179e-05	1	6.20901	IND	STEAP1
RBPMS	209487_at	11030	0.93164	0.175423	0.349158	-5.27503	3.941e-10	3.7974e-08	4	6.20667	repr
FERMT2	209210_s_at	10979	2.46133	7.29377e-05	0.00991172	-3.73413	0.000333209	0.00354023	4	6.19547	repr
MGP	202291_s_at	4256	4.57867	0.00446428	0.0436332	-1.60055	0.318321	0.527709	4	6.17922	repr
TCF7L2	216035_x_at	6934	2.7948	0.000132223	0.0108146	-3.38108	1.14676e-07	5.01014e-06	4	6.17588	repr
BUB1B	203755_at	701	-2.62217	0.00280241	0.0364365	3.53956	3.00402e-05	0.000514118	1	6.16173	IND
CDKN1A	202284_s_at	1026	2.25832	0.00541471	0.0483338	-3.89727	7.40036e-07	2.31179e-05	4	6.15559	repr
SPOCK1	202363_at	6695	1.04951	0.102525	0.255459	-5.10109	6.79872e-05	0.00100678	4	6.1506	repr
NPY	206001_at	4852	0.739523	0.528722	0.694757	5.39568	2.33638e-06	6.01982e-05	2	6.1352	IND
PNMA2	209598_at	10687	-1.46164	0.00150702	0.0275174	4.66576	0.00199211	0.0142259	1	6.1274	IND
CD44	209835_x_at	960	0.862807	0.0410213	0.148581	-5.25895	4.34797e-10	4.13292e-08	4	6.12176	repr		CD44
RUNX3	204198_s_at	864	-0.735094	0.434236	0.618316	5.38621	7.21611e-07	2.27615e-05	1	6.1213	IND	RUNX3
CALD1	201617_x_at	800	2.90712	0.00246653	0.0347425	-3.20114	2.0071e-06	5.26788e-05	4	6.10826	repr
HBA1	204018_x_at	3039	-1.42774	0.15435	0.323703	4.6746	0.0135254	0.0583665	1	6.10234	IND
MT2A	212185_x_at	4502	2.50172	0.000126757	0.0108146	-3.57842	2.80148e-05	0.00049264	4	6.08014	repr
CLU	208791_at	1191	1.17711	0.13686	0.301082	-4.88865	0.00295437	0.0191178	4	6.06575	repr
ABHD6	221679_s_at	57406	-2.72053	0.000155879	0.0114732	3.34119	3.81412e-07	1.33475e-05	1	6.06172	IND
EGFR	201983_s_at	1956	-0.176667	0.735642	0.843991	-5.87549	9.89833e-08	4.37892e-06	3	6.05216	repr
RRM2	209773_s_at	6241	-2.28743	0.000377418	0.0158021	3.76199	0.00477448	0.0273483	1	6.04943	IND
SEMA3C	203789_s_at	10512	1.80875	0.0156583	0.0854463	-4.23021	3.08403e-06	7.65207e-05	4	6.03897	repr
CXCL14	218002_s_at	9547	1.02106	0.265788	0.452895	-4.99153	8.0692e-05	0.00113973	4	6.01259	repr
VRK1	203856_at	7443	-2.04918	0.000317838	0.0144361	3.96127	1.64526e-08	9.80743e-07	1	6.01044	IND
LOXL2	202998_s_at	4017	3.90422	0.00260991	0.0356468	-2.08064	0.0290168	0.102257	4	5.98487	repr		LOXL2
KIAA0101	202503_s_at	9768	-1.31789	0.00375453	0.0409448	4.66217	0.000885134	0.0075467	1	5.98005	IND
PCDH8	206935_at	5100	-0.899911	0.394588	0.580794	5.07937	1.92378e-12	4.22871e-10	1	5.97928	IND
UTS2	220784_s_at	10911	-2.19413	0.00387321	0.0417379	3.77665	0.000154631	0.00192509	1	5.97078	IND			UTS2
SMAD7	204790_at	4092	1.38094	0.00350372	0.0397657	-4.57556	2.78441e-15	1.39897e-12	4	5.95649	repr
GREM1	218468_s_at	26585	3.03725	0.0143902	0.0814977	-2.90692	4.0117e-07	1.39404e-05	4	5.94417	repr
SLC2A3	202497_x_at	6515	1.32511	0.0536313	0.172936	-4.61899	2.1557e-06	5.59528e-05	4	5.94411	repr
SNAI2	213139_at	6591	3.45148	3.34462e-05	0.00891522	-2.48301	0.00119921	0.00964029	4	5.93449	repr		SNAI2
PCDH17	205656_at	27253	-0.903976	0.0325073	0.12955	5.02434	1.78191e-09	1.37736e-07	1	5.92832	IND	PCDH17
PRC1	218009_s_at	9055	-1.88778	0.00638281	0.0526325	4.03832	0.000101883	0.00138348	1	5.9261	IND	PRC1
SDC2	212158_at	6383	2.03451	0.00395413	0.0419118	-3.88486	1.76759e-06	4.80048e-05	4	5.91937	repr			SDC2
UGCG	204881_s_at	7357	2.28122	0.000900553	0.0214678	-3.62549	3.16716e-05	0.000535525	4	5.90671	repr		UGCG
S100A10	200872_at	6281	2.87201	0.000240698	0.0127298	-3.02454	0.00016552	0.00203188	4	5.89655	repr		S100A10
COL3A1	215076_s_at	1281	4.42982	0.00299581	0.0372306	-1.45864	0.296128	0.503677	4	5.88846	repr		COL3A1
MT1X	208581_x_at	4501	2.66388	6.31118e-05	0.00991172	-3.22266	0.00116445	0.00944718	4	5.88654	repr
CHN2	213385_at	1124	-1.05894	0.311054	0.501825	4.81479	3.8537e-08	1.93621e-06	1	5.87373	IND
TGFBR2	208944_at	7048	1.92522	8.57221e-05	0.00991172	-3.94714	2.21609e-05	0.000406678	4	5.87236	repr			TGFBR2
TOP2A	201292_at	7153	-2.27235	0.0039431	0.0419118	3.59815	3.77484e-05	0.000626231	1	5.87049	IND	TOP2A
OLFML3	218162_at	56944	-2.73475	0.00959885	0.0654247	-3.1305	0.000205417	0.00240017	3	5.86525	repr
NAV3	204823_at	89795	2.14409	0.0665695	0.198411	-3.66695	2.12372e-06	5.53269e-05	4	5.81104	repr
GEM	204472_at	2669	1.27263	0.0300323	0.123609	-4.53312	8.89315e-08	3.98436e-06	4	5.80575	repr
NLGN4X	221933_at	57502	-1.96132	0.00270919	0.0363109	3.8436	3.3702e-11	4.74119e-09	1	5.80492	IND
FSTL1	208782_at	11167	2.87352	0.00100172	0.0225983	-2.92965	0.00863706	0.0420146	4	5.80318	repr
JAKMIP2	205888_s_at	9832	-1.5063	0.0117056	0.0723523	4.28682	1.83816e-14	7.18311e-12	1	5.79312	IND
CRIM1	202551_s_at	51232	2.94822	9.00457e-05	0.00991172	-2.83561	7.35383e-07	2.30923e-05	4	5.78383	repr
NCKAP1L	209734_at	3071	-2.07085	0.00579008	0.0501202	3.70951	5.32364e-05	0.000823	1	5.78037	IND	NCKAP1L
TUFT1	205807_s_at	7286	1.96532	0.00130751	0.0259803	-3.79856	3.30024e-10	3.26956e-08	4	5.76388	repr
NELL2	203413_at	4753	-1.6534	0.00294928	0.0369791	4.10348	0.00024238	0.002741	1	5.75688	IND	NELL2
UGDH	203343_at	7358	1.58731	0.000797623	0.0204762	-4.1605	5.38586e-13	1.57851e-10	4	5.7478	repr
PID1	219093_at	55022	1.27973	0.0811889	0.222704	-4.44483	1.555e-12	3.77167e-10	4	5.72456	repr
NP	201695_s_at	4860	-2.05214	0.00432575	0.0429764	-3.64938	0.0001941	0.00229463	3	5.70152	repr
AKR1C2	211653_x_at	1646	1.74648	0.0932799	0.241313	-3.9542	7.32847e-05	0.00106067	4	5.70069	repr
ACTA2	200974_at	59	2.94086	0.0109861	0.0700601	-2.75244	0.0156875	0.0649593	4	5.6933	repr
GSN	200696_s_at	2934	1.9126	0.00493916	0.046016	-3.77685	0.00158339	0.0118233	4	5.68945	repr
TYMS	202589_at	7298	-2.12614	0.000422224	0.0163618	3.5601	0.00278559	0.0182268	1	5.68624	IND	TYMS
CEBPD	203973_s_at	1052	2.06008	0.00438053	0.0433981	-3.6234	0.00259078	0.0173071	4	5.68349	repr		CEBPD
FST	204948_s_at	10468	0.637857	0.237962	0.420559	-5.04271	2.28117e-11	3.56572e-09	4	5.68057	repr
GADD45A	203725_at	1647	2.02544	0.001818	0.0298084	-3.64492	5.86799e-08	2.82709e-06	4	5.67035	repr
PIM1	209193_at	5292	1.23073	0.0107111	0.0689314	-4.43468	6.29536e-06	0.000140576	4	5.66541	repr
VCAM1	203868_s_at	7412	1.07817	0.0859105	0.22919	-4.57299	7.15499e-08	3.35521e-06	4	5.65117	repr
HEG1	213069_at	57493	1.67496	0.00990188	0.0663964	-3.97257	1.28251e-07	5.5007e-06	4	5.64753	repr		HEG1
PRIM1	205053_at	5557	-3.40134	0.000115993	0.0105961	2.24532	0.0034243	0.0214484	1	5.64666	IND	PRIM1
PBK	219148_at	55872	-3.25741	0.000372486	0.0157501	2.37575	0.00551971	0.03038	1	5.63316	IND
PTRF	208789_at	284119	2.37474	0.000522599	0.0171355	-3.25002	0.00302447	0.0195175	4	5.62476	repr
CRYAB	209283_at	1410	3.85026	0.000181253	0.0114732	-1.76036	0.260074	0.463833	4	5.61062	repr		CRYAB
PLAUR	210845_s_at	5329	1.60794	0.013032	0.0774121	-3.9994	2.1899e-09	1.65632e-07	4	5.60734	repr		PLAUR
SOX11	204913_s_at	6664	1.43601	0.0564468	0.178957	4.16056	4.78339e-07	1.62543e-05	2	5.59656	IND	SOX11
CCNB1	214710_s_at	891	-2.69958	0.00965629	0.0655621	2.88399	0.000616426	0.00574297	1	5.58357	IND
RGS16	209325_s_at	6004	1.08541	0.0717653	0.206676	-4.49149	4.08126e-14	1.51092e-11	4	5.5769	repr
KIF15	219306_at	56992	-3.01272	0.000505536	0.0170891	2.55332	0.000221804	0.00255766	1	5.56603	IND	KIF15
ADRB3	206812_at	155	-1.35139	0.0292674	0.122031	4.20547	7.80478e-10	6.53557e-08	1	5.55685	IND	ADRB3
GBE1	203282_at	2632	2.21912	4.72297e-05	0.00977098	-3.3256	0.000117615	0.00154348	4	5.54471	repr
GLG1	212045_at	2734	-1.81182	0.00222605	0.0323865	3.72625	4.26842e-17	3.33601e-14	1	5.53808	IND	GLG1
GNG12	212294_at	55970	1.95986	0.00149997	0.0274955	-3.56992	2.74558e-05	0.00048402	4	5.52977	repr
KDELR3	204017_at	11015	1.20931	0.0307129	0.12531	-4.30001	2.24441e-07	8.90831e-06	4	5.50931	repr
PTGES3	212063_at	10728	1.3154	0.0241954	0.109038	-4.16708	0.00141666	0.0108677	4	5.48248	repr
COL5A1	212488_at	1289	3.91004	9.82854e-05	0.00991172	-1.57038	0.118627	0.277504	4	5.48042	repr
ACTN2	203861_s_at	88	-1.60972	0.00119476	0.0252371	3.8646	0.000169301	0.00206747	1	5.47432	IND	ACTN2
FAT	201579_at	2195	1.50849	0.0397091	0.145173	-3.96461	9.22008e-08	4.10468e-06	4	5.4731	repr
LAMC1	200771_at	3915	1.54187	0.0366019	0.138642	-3.92369	0.000330593	0.00351799	4	5.46556	repr
PDGFRL	205226_at	5157	0.12465	0.624098	0.764658	-5.32693	3.10573e-11	4.55119e-09	4	5.45158	repr
FOSL1	204420_at	8061	2.39345	0.0210306	0.10002	-3.05148	2.78836e-08	1.47468e-06	4	5.44493	repr
NQO1	201467_s_at	1728	4.30183	0.00343354	0.0394633	-1.13988	0.0209038	0.0800857	4	5.4417	repr
CSPG5	39966_at	10675	-1.74639	0.000401877	0.0160614	3.69111	4.93949e-06	0.000113544	1	5.43751	IND	CSPG5
PAFAH1B3	203228_at	5050	-1.48597	0.000132083	0.0108146	3.94411	9.7445e-10	7.87849e-08	1	5.43008	IND
GCLM	203925_at	2730	2.06287	0.0193172	0.0951548	-3.36049	1.6331e-08	9.80743e-07	4	5.42336	repr
RPL5	213689_x_at	6125	-0.111278	0.601448	0.747807	-5.30926	2.6572e-09	1.96745e-07	3	5.42054	repr
SOD2	215223_s_at	6648	-0.318986	0.418361	0.604757	-5.09576	1.56268e-08	9.55818e-07	3	5.41474	repr
BEX1	218332_at	55859	-0.225452	0.474547	0.653497	5.17058	3.1113e-05	0.000527347	1	5.39604	IND
ATP1A1	220948_s_at	476	-1.3468	0.00180558	0.0297967	4.04337	1.90899e-10	2.0981e-08	1	5.39017	IND
HTRA1	201185_at	5654	1.78877	0.0620831	0.190612	-3.59882	0.013364	0.0579189	4	5.38759	repr
TSC22D3	208763_s_at	1831	2.39353	0.00861088	0.0617497	-2.99394	0.00142785	0.0109169	4	5.38748	repr
MBNL2	205018_s_at	10150	2.37741	0.00385588	0.0416625	-2.94829	1.7511e-10	1.95512e-08	4	5.32571	repr
IL13RA1	201887_at	3597	1.58835	0.00100928	0.0226091	-3.728	1.32574e-09	1.05969e-07	4	5.31634	repr
KCTD12	212188_at	115207	1.63717	0.0117441	0.0724633	-3.66815	3.04105e-07	1.12583e-05	4	5.30531	repr
PPIC	204518_s_at	5480	2.43437	0.000188869	0.0116294	-2.86547	1.4567e-05	0.000287016	4	5.29984	repr		PPIC
MAP1B	212233_at	4131	2.94162	8.28583e-06	0.00514564	-2.35614	0.113569	0.269152	4	5.29777	repr
DMN	212730_at	23336	1.46212	0.0283427	0.119558	-3.83025	1.92242e-05	0.000357734	4	5.29236	repr		DMN
FHL2	202949_s_at	2274	1.94162	0.0251015	0.111116	-3.33876	0.0018236	0.0132103	4	5.28038	repr
TFPI	213258_at	7035	2.30754	0.00333892	0.0390807	-2.9707	0.000302086	0.00324904	4	5.27824	repr
RRAS2	212589_at	22800	1.34125	0.0045194	0.0439103	-3.93602	5.16977e-07	1.71529e-05	4	5.27727	repr
PRSS23	202458_at	11098	1.91725	0.00168841	0.0288007	-3.34887	0.000145233	0.00183077	4	5.26611	repr
SPRY1	212558_at	10252	1.91857	0.0115529	0.0715973	-3.33685	3.51842e-06	8.50467e-05	4	5.25542	repr		SPRY1
TPX2	210052_s_at	22974	-2.28248	0.0228988	0.105068	2.94925	0.00330164	0.02096	1	5.23172	IND	TPX2
KIF20A	218755_at	10112	-2.43549	0.0270684	0.116451	2.78746	9.36712e-05	0.00128688	1	5.22295	IND
DLC1	210762_s_at	10395	1.53681	0.00628088	0.0525319	-3.67992	8.37518e-06	0.000176708	4	5.21673	repr
CDC20	202870_s_at	991	-1.70891	0.0344221	0.134067	3.50163	0.00270525	0.0178901	1	5.21054	IND	CDC20
GINS1	206102_at	9837	-2.56738	0.00018875	0.0116294	2.63946	0.000286553	0.00313277	1	5.20684	IND
FAM114A1	213455_at	92689	1.89506	0.00616936	0.0520952	-3.31106	0.000240642	0.00273012	4	5.20612	repr
ARHGEF10	216620_s_at	9639	1.10537	0.00853022	0.0615585	-4.09956	5.53946e-08	2.70587e-06	4	5.20493	repr
FOXM1	202580_x_at	2305	-2.55744	0.0076533	0.0581982	2.64108	0.00400776	0.0240329	1	5.19853	IND	FOXM1	FOXM1
C1R	212067_s_at	715	-0.501082	0.340607	0.530874	-4.69082	6.88958e-06	0.000151916	3	5.1919	repr
SERPINE1	202627_s_at	5054	2.19609	0.0394595	0.14489	-2.99399	0.00399151	0.0239559	4	5.19009	repr
RNF141	219104_at	50862	-2.40332	2.29416e-05	0.00762237	2.77332	3.06185e-06	7.63726e-05	1	5.17663	IND
CADPS2	219572_at	93664	-1.95193	0.000351393	0.0153488	3.22465	3.9156e-05	0.00064502	1	5.17657	IND
GRP	206326_at	2922	-2.42198	0.00356327	0.04006	2.75206	0.00141728	0.0108677	1	5.17404	IND
MLF1IP	218883_s_at	79682	-2.08472	0.000282962	0.0137606	3.08007	0.000531162	0.00511807	1	5.16479	IND
TRIB2	202478_at	28951	0.599725	0.450813	0.634203	4.55306	4.45721e-06	0.00010416	2	5.15279	IND
CXCR4	211919_s_at	7852	-3.49838	0.0216334	0.101922	1.64634	0.299161	0.50706	1	5.14472	IND
RECK	205407_at	8434	0.797011	0.0211141	0.100349	-4.33638	4.13617e-21	5.81876e-18	4	5.13339	repr
PALLD	200907_s_at	23022	2.54467	3.55242e-05	0.00892418	-2.57953	0.014974	0.0626204	4	5.1242	repr		PALLD
FADS2	202218_s_at	9415	-0.830999	0.0647988	0.195956	4.28502	2.5775e-10	2.66619e-08	1	5.11602	IND
TIMP3	201149_s_at	7078	-1.3089	0.0750005	0.212182	-3.80653	0.000127212	0.00165012	3	5.11543	repr
CSRP2	211126_s_at	1466	1.70414	0.0266667	0.115572	-3.40359	1.35684e-08	8.37195e-07	4	5.10772	repr		CSRP2
NUPR1	209230_s_at	26471	3.15735	0.00100522	0.0225983	-1.94549	0.0262501	0.0947374	4	5.10284	repr
FOXC1	213260_at	2296	2.27268	0.0252258	0.111526	-2.82991	3.58444e-07	1.27656e-05	4	5.10259	repr
KDSR	202419_at	2531	-2.33127	9.31756e-05	0.00991172	2.76905	3.4705e-06	8.41776e-05	1	5.10031	IND
MT1L	204326_x_at	4500	2.24073	0.000911697	0.0214678	-2.85217	0.0101316	0.0471335	4	5.0929	repr
ANGPTL4	221009_s_at	51129	1.16029	0.0463656	0.158395	-3.92858	1.43488e-11	2.29386e-09	4	5.08888	repr
TGFBI	201506_at	7045	2.8416	0.0109064	0.069678	-2.23484	0.0885838	0.226765	4	5.07644	repr		TGFBI	TGFBI
LDB2	206481_s_at	9079	-2.91131	2.24475e-05	0.00762237	2.16229	0.00911284	0.0436349	1	5.0736	IND	LDB2
CD74	209619_at	972	0.254313	0.290781	0.481003	4.81291	8.56519e-05	0.00119539	2	5.06722	IND
PLK1	202240_at	5347	-4.11271	0.00305777	0.037727	0.920913	0.130492	0.296187	1	5.03362	IND	PLK1
C14orf94	218383_at	54930	-3.83712	2.7448e-06	0.00265296	1.18446	0.156522	0.334256	1	5.02158	IND
GDF15	221577_x_at	9518	3.66082	0.0175896	0.0909794	-1.33151	0.13718	0.306207	4	4.99233	repr
ITGB5	201125_s_at	3693	1.0786	0.0102482	0.0672744	-3.90925	7.86136e-06	0.000168075	4	4.98785	repr
NUAK1	204589_at	9891	2.34017	0.0006858	0.0187701	-2.64408	0.0055739	0.0306303	4	4.98425	repr
MKI67	212021_s_at	4288	-3.31711	0.000472697	0.0170719	1.66645	0.0416062	0.133147	1	4.98356	IND	MKI67
EMP1	201324_at	2012	1.20395	0.0414606	0.149402	-3.77704	2.38957e-05	0.000432088	4	4.98098	repr		EMP1
GLCE	213552_at	26035	-1.13342	0.0272123	0.116786	3.8246	7.8191e-18	6.87495e-15	1	4.95801	IND	GLCE
KIF4A	218355_at	24137	-2.32809	0.0105439	0.0683261	2.61327	0.000643354	0.00592324	1	4.94136	IND
CENPA	204962_s_at	1058	-2.81152	0.0022043	0.0322774	2.11612	0.00343487	0.0214826	1	4.92764	IND	CENPA
MMP9	203936_s_at	4318	-0.686524	0.0944839	0.243443	4.24023	2.31641e-05	0.000419938	1	4.92675	IND
GCH1	204224_s_at	2643	-1.18473	0.056697	0.179481	-3.73975	0.000860683	0.00740103	3	4.92448	repr	GCH1
CYBRD1	217889_s_at	79901	1.21927	0.053646	0.172936	-3.69858	4.76632e-10	4.35407e-08	4	4.91784	repr
CBR3	205379_at	874	-2.43094	4.20295e-05	0.00923861	-2.48124	1.71679e-07	7.20301e-06	3	4.91218	repr
SPRY2	204011_at	10253	1.57914	0.00760856	0.0581589	-3.32639	3.10252e-07	1.14257e-05	4	4.90553	repr		SPRY2
HOOK1	219976_at	51361	-1.46989	0.00337578	0.0393134	3.43206	5.97807e-08	2.86053e-06	1	4.90195	IND	HOOK1
HSPA1A	200800_s_at	3303	2.93661	0.00181073	0.0297967	-1.95247	0.0125094	0.0553197	4	4.88907	repr
MEIS2	207480_s_at	4212	1.17927	0.0591185	0.184571	-3.70079	3.29441e-07	1.18835e-05	4	4.88006	repr		MEIS2
COL5A2	221730_at	1290	2.52715	0.00420411	0.0422676	-2.348	0.00839741	0.0411907	4	4.87515	repr		COL5A2
FOS	209189_at	2353	-3.43914	0.00547349	0.0486118	-1.43561	0.363275	0.57229	3	4.87476	repr
RFC4	204023_at	5984	-1.71838	0.00123765	0.0253071	3.15222	0.000276656	0.00305494	1	4.8706	IND
ARID5B	212614_at	84159	2.26383	0.00304589	0.0377197	-2.60523	0.00208383	0.014643	4	4.86906	repr
RNASEH2A	203022_at	10535	-2.60488	0.000334654	0.0149934	2.25491	2.7099e-05	0.000480137	1	4.85979	IND	RNASEH2A
DLG7	203764_at	9787	-2.61034	0.0173082	0.0904501	2.242	0.00181029	0.013141	1	4.85234	IND	DLG7
TJP2	202085_at	9414	0.361033	0.430187	0.614902	-4.46245	2.64845e-07	1.01246e-05	4	4.82348	repr
AXL	202686_s_at	558	0.752438	0.0756855	0.213376	-4.07101	2.01914e-06	5.27978e-05	4	4.82345	repr
SRPX2	205499_at	27286	1.75785	0.00028562	0.0137606	-3.06514	1.05226e-11	1.94779e-09	4	4.82299	repr		SRPX2
DUSP5	209457_at	1847	2.20365	0.0717813	0.206676	-2.61714	0.00867669	0.0421199	4	4.82079	repr			DUSP5
MID1	203636_at	4281	3.09272	0.000826339	0.0208089	-1.72069	0.000546349	0.00524319	4	4.81341	repr
LYPD1	212909_at	116372	-1.72324	0.0157966	0.0859709	3.08437	5.85169e-05	0.000889002	1	4.80761	IND
TFAP2B	214451_at	7021	-1.65744	0.0446896	0.155156	3.14926	9.73876e-05	0.001325	1	4.8067	IND	TFAP2B
SERPING1	200986_at	710	-1.02089	0.00337225	0.0393134	-3.77783	0.000118449	0.00155152	3	4.79872	repr
MRPL35	218890_x_at	51318	-2.05739	9.17666e-05	0.00991172	2.73905	0.000109551	0.00146499	1	4.79644	IND	MRPL35
PNMAL1	218824_at	55228	-0.986024	0.0648684	0.196024	3.8045	0.000891764	0.00759402	1	4.79052	IND
FANCI	213008_at	55215	-2.2698	0.00022863	0.0126629	2.52063	0.000182474	0.00218199	1	4.79044	IND
GFPT1	202721_s_at	2673	3.44921	0.000118412	0.0106783	-1.33878	0.00312963	0.0200673	4	4.78799	repr			GFPT1
CDKN1C	213348_at	1028	1.95908	0.090719	0.237099	-2.82631	0.013052	0.0569526	4	4.78538	repr		CDKN1C
SAMD4A	212845_at	23034	1.5534	0.00752332	0.057835	-3.21894	1.19938e-05	0.000238333	4	4.77234	repr
GLB1L2	213713_s_at	89944	-2.98498	8.77846e-06	0.00514564	1.77862	0.00188574	0.0135502	1	4.7636	IND
MICA	205904_at	4276	2.20586	0.000147558	0.0114732	-2.54086	4.8438e-07	1.63804e-05	4	4.74673	repr
PAM	212958_x_at	5066	1.0466	0.036853	0.139143	-3.69967	4.36254e-05	0.000697411	4	4.74627	repr
CTSO	203758_at	1519	1.75499	0.0015966	0.0280761	-2.98631	2.26605e-07	8.90831e-06	4	4.7413	repr
ITGB2	202803_s_at	3689	-1.77374	0.00178285	0.0295768	2.94839	0.0150399	0.0628583	1	4.72213	IND			ITGB2
ANK2	202920_at	287	0.326792	0.205029	0.384683	-4.38459	0.000356608	0.00372163	4	4.71138	repr
SPARC	212667_at	6678	2.47619	0.000177804	0.0114732	-2.22565	0.0470439	0.144249	4	4.70184	repr		SPARC
LAPTM5	201721_s_at	7805	0.227222	0.584827	0.738011	4.47059	0.000565986	0.00540607	2	4.69781	IND
MYO1B	212365_at	4430	1.09092	0.0147273	0.0823139	-3.59501	2.49859e-08	1.36241e-06	4	4.68593	repr
TGFBR3	204731_at	7049	0.670108	0.0742846	0.211286	-4.01278	1.56983e-06	4.33028e-05	4	4.68289	repr
DKK2	219908_at	27123	-1.03671	0.184917	0.360436	3.64618	9.10884e-09	5.82469e-07	1	4.68289	IND
ABCA8	204719_at	10351	0.0611827	0.787292	0.87693	-4.61219	1.35918e-06	3.80896e-05	5	4.67337	repr
NNMT	202237_at	4837	1.1609	0.00208563	0.0314588	-3.49929	0.00351749	0.0218377	4	4.66019	repr
NUDT1	204766_s_at	4521	-2.56941	0.000357274	0.0154176	2.08144	0.000675114	0.00616721	1	4.65084	IND	NUDT1
ZWINT	204026_s_at	11130	-1.92524	0.00374184	0.0409333	2.72411	0.00523869	0.0293384	1	4.64935	IND
CAP2	212551_at	10486	1.87639	0.0025652	0.0353566	-2.76256	0.00953803	0.0452397	4	4.63894	repr
ZFP36L2	201368_at	678	1.48834	0.000318112	0.0144361	-3.14807	0.000709937	0.00637765	4	4.63641	repr		ZFP36L2
HIST1H2BD	209911_x_at	3017	1.34756	0.0656714	0.19707	3.28479	3.82853e-05	0.000633644	2	4.63235	IND
CAD	202715_at	790	-1.80724	8.06156e-05	0.00991172	2.81883	1.84523e-05	0.000345557	1	4.62607	IND	CAD
CD302	203799_at	9936	-0.564882	0.0421712	0.150575	-4.05321	3.11574e-06	7.66298e-05	3	4.61809	repr
ALDH7A1	208950_s_at	501	-1.86649	0.00543205	0.0484272	2.75142	4.06026e-06	9.61612e-05	1	4.61791	IND
LIG1	202726_at	3978	-2.19659	0.0033886	0.0393974	2.41775	7.40812e-05	0.0010678	1	4.61434	IND
CCNB2	202705_at	9133	-2.0251	0.0031265	0.0378517	2.58696	0.00466004	0.0268458	1	4.61206	IND	CCNB2
SGCE	204688_at	8910	0.0955696	0.796582	0.884038	-4.51446	2.34058e-08	1.2965e-06	5	4.61003	repr			SGCE
C6orf108	204238_s_at	10591	-2.87483	0.000527464	0.0171603	1.73486	0.0246344	0.0905676	1	4.6097	IND
RAB31	217764_s_at	11031	2.87849	0.00319653	0.0382558	-1.73057	0.10644	0.257344	4	4.60906	repr
HEY1	44783_s_at	23462	3.88189	0.00197167	0.030933	-0.724889	0.432591	0.63419	4	4.60677	repr
HMMR	207165_at	3161	-2.23765	0.0134496	0.0787714	2.36834	0.00598931	0.0320128	1	4.60599	IND
SH2B3	203320_at	10019	-2.60972	0.00187064	0.0299729	1.99531	0.00171825	0.0126557	1	4.60503	IND	SH2B3
RNASE1	201785_at	6035	0.133111	0.795039	0.88346	4.46444	2.60934e-05	0.00046584	2	4.59755	IND
ATAD2	218782_s_at	29028	-2.9293	0.0044725	0.0436332	1.66318	0.0106054	0.0487255	1	4.59247	IND	ATAD2
CNN3	201445_at	1266	0.989454	0.00637957	0.0526325	-3.59929	0.000265266	0.00295235	4	4.58874	repr
MX2	204994_at	4600	-0.165901	0.581288	0.734996	-4.41738	2.67746e-05	0.000475587	3	4.58328	repr
TLE2	40837_at	7089	-1.64843	0.00225857	0.0327018	2.90783	1.90083e-06	5.06455e-05	1	4.55627	IND
AKR1C3	209160_at	8644	1.38737	0.055399	0.176724	-3.16283	0.00582748	0.0314827	4	4.5502	repr
CDC42EP3	209288_s_at	10602	3.22051	0.00037246	0.0157501	-1.32936	0.0961719	0.23956	4	4.54987	repr
ZFP36	201531_at	7538	0.771665	0.116181	0.273043	-3.77747	0.00013984	0.00177551	4	4.54914	repr
CENPM	218741_at	79019	-3.04482	0.00139369	0.0268867	1.50289	0.0532161	0.158276	1	4.54771	IND	CENPM
TACC3	218308_at	10460	-1.77507	0.0204434	0.0979555	2.76344	0.000638912	0.00590529	1	4.53851	IND	TACC3
KLF2	219371_s_at	10365	1.71728	0.0133997	0.0786565	-2.81399	0.000429487	0.00429731	4	4.53126	repr
IRS2	209184_s_at	8660	-1.107	0.0707671	0.205634	3.41542	3.90566e-06	9.31267e-05	1	4.52242	IND	IRS2
FHL1	214505_s_at	2273	2.69889	0.00294839	0.0369791	-1.82315	0.0391592	0.12758	4	4.52204	repr
POLA1	204835_at	5422	-2.84542	0.00054892	0.0174711	1.6709	0.000145042	0.00183077	1	4.51631	IND
KIAA1797	218503_at	54914	-1.13515	0.00710491	0.0560897	3.37621	5.57299e-10	4.85322e-08	1	4.51136	IND
EFHD1	209343_at	80303	-0.282917	0.556079	0.715306	-4.223	0.000936778	0.00786312	3	4.50592	repr
ASPH	210896_s_at	444	1.85886	0.00247386	0.0347425	-2.63746	1.34862e-06	3.80896e-05	4	4.49632	repr
ATXN1	203232_s_at	6310	2.51149	0.000100047	0.00991172	-1.97909	0.0253434	0.0924133	4	4.49058	repr
PLA2G2A	203649_s_at	5320	0.0558341	0.795196	0.883495	-4.43019	1.5265e-05	0.000297436	5	4.48603	repr
LPP	202822_at	4026	2.11818	0.000845088	0.0208253	-2.36538	0.000777639	0.00682885	4	4.48356	repr
ANGPTL2	213001_at	23452	-0.464633	0.321332	0.512569	-4.01361	4.77256e-06	0.000110537	3	4.47824	repr
IGFBP5	211959_at	3488	3.52117	0.0142113	0.0809412	-0.946722	0.434711	0.635972	4	4.4679	repr
IFRD1	202146_at	3475	1.31348	0.0089401	0.0632643	-3.14125	1.21453e-07	5.27344e-06	4	4.45473	repr
COL6A1	213428_s_at	1291	2.38398	0.00310633	0.037845	-2.06622	0.0464776	0.143137	4	4.4502	repr		COL6A1
SYT1	203999_at	6857	-1.69055	0.0269293	0.116209	2.75947	0.0884927	0.226765	1	4.45002	IND	SYT1
SEPT6	212414_s_at	23157	0.429294	0.209321	0.389618	4.0125	0.000223446	0.00256817	2	4.44179	IND
PRKDC	208694_at	5591	-1.0496	0.00455992	0.043998	3.38999	1.76234e-07	7.29378e-06	1	4.4396	IND
HBB	211696_x_at	3043	0.174326	0.487977	0.66417	4.2487	0.0157193	0.0650409	2	4.42303	IND
HSPA1B	202581_at	3304	2.29935	0.00145407	0.0271796	-2.11962	0.0373346	0.12335	4	4.41897	repr
EPS8	202609_at	2059	0.959029	0.126218	0.286762	-3.45597	1.03355e-05	0.000208907	4	4.415	repr
MELK	204825_at	9833	-1.53508	0.00946669	0.0649717	2.87091	9.3097e-05	0.00128167	1	4.40599	IND
MCM2	202107_s_at	4171	-2.22997	0.00026467	0.0135768	2.17577	0.0453631	0.140814	1	4.40575	IND
ELL2	214446_at	22936	2.2826	0.00442135	0.0435052	-2.12116	3.20118e-06	7.79138e-05	4	4.40377	repr
BAG3	217911_s_at	9531	1.39098	0.00434296	0.0430865	-3.01049	3.00095e-05	0.000514118	4	4.40147	repr
KIF11	204444_at	3832	-2.04394	0.00392818	0.0419118	2.3567	0.000498333	0.00486168	1	4.40064	IND
RAI14	202052_s_at	26064	3.06965	9.60857e-05	0.00991172	-1.32981	0.0581885	0.169233	4	4.39946	repr		RAI14
ZC3H13	212402_at	23091	-0.739664	0.0619053	0.190232	3.65885	3.06464e-10	3.12416e-08	1	4.39852	IND
PLAT	201860_s_at	5327	0.663555	0.129063	0.290784	-3.72945	3.16829e-06	7.73812e-05	4	4.393	repr
DTL	218585_s_at	51514	-2.1719	6.30685e-05	0.00991172	2.21754	0.000799105	0.00697382	1	4.38944	IND
ITGB3BP	205176_s_at	23421	-2.42389	7.77974e-05	0.00991172	1.96492	0.00432321	0.0253412	1	4.38881	IND	ITGB3BP
COL6A2	209156_s_at	1292	1.74372	0.00821496	0.0606975	-2.63726	0.0655582	0.184381	4	4.38097	repr		COL6A2
DNAJC9	213092_x_at	23234	-2.11858	0.000554582	0.0175718	2.25563	4.00074e-05	0.000655971	1	4.37421	IND
NUDT11	219855_at	55190	-1.16467	0.00989545	0.0663964	3.20779	2.75783e-07	1.04857e-05	1	4.37247	IND	NUDT11
SGK1	201739_at	6446	1.52519	0.0230054	0.105351	-2.82795	0.00214491	0.0149527	4	4.35314	repr
PARVA	217890_s_at	55742	1.46995	0.00121949	0.0253071	-2.8792	2.86425e-05	0.000501172	4	4.34915	repr
SAT1	210592_s_at	6303	3.35636	0.000177158	0.0114732	-0.980096	0.172933	0.357874	4	4.33646	repr		SAT1
TGFB1	203085_s_at	7040	-2.61926	0.000604854	0.0178795	1.71691	0.18235	0.370617	1	4.33617	IND
MCM3	201555_at	4172	-2.06455	5.12239e-05	0.00991172	2.27045	0.00419886	0.0248382	1	4.335	IND
NR4A2	204622_x_at	4929	0.336226	0.356058	0.545526	-3.99696	1.6036e-06	4.38899e-05	4	4.33318	repr
LIMA1	217892_s_at	51474	2.04181	0.000394846	0.016054	-2.28809	0.003337	0.0211083	4	4.3299	repr
DRAM	218627_at	55332	2.21362	0.00414033	0.0420393	-2.11522	1.34828e-06	3.80896e-05	4	4.32884	repr
HOXD13	207398_at	3239	-2.48868	0.00216486	0.031932	1.82709	0.00277535	0.0181767	1	4.31577	IND
NPY1R	205440_s_at	4886	-1.66507	0.00989599	0.0663964	2.64768	0.000269219	0.00299161	1	4.31275	IND	NPY1R
BACH1	204194_at	571	1.4523	0.000595131	0.0178795	-2.86009	3.29948e-10	3.26956e-08	4	4.31238	repr
NOV	214321_at	4856	1.49444	0.0953911	0.244549	-2.81501	0.000345535	0.00363876	4	4.30945	repr
TNFAIP3	202644_s_at	7128	0.193869	0.407794	0.595356	-4.11326	0.00220364	0.0152713	4	4.30713	repr
ZDHHC3	218078_s_at	51304	-2.08313	0.00111971	0.024234	2.22301	2.30299e-05	0.000418585	1	4.30614	IND	ZDHHC3
KNTC1	206316_s_at	9735	-2.18242	2.92259e-05	0.00822299	2.11955	3.46667e-05	0.000581971	1	4.30197	IND
TMEM106C	201764_at	79022	-1.62202	0.00410823	0.0420262	2.67292	0.00011186	0.00148457	1	4.29495	IND
CRISPLD2	221541_at	83716	0.106029	0.666301	0.796797	-4.18763	7.60234e-05	0.00108689	4	4.29366	repr
EZH2	203358_s_at	2146	-1.46848	0.000195091	0.0116294	2.82346	5.79424e-05	0.000886015	1	4.29194	IND	EZH2
PDLIM1	208690_s_at	9124	0.629648	0.275784	0.463557	-3.65674	0.00238405	0.0162652	4	4.28639	repr			PDLIM1
MYOM2	205826_at	9172	-1.88004	0.0100675	0.0668014	2.39662	0.00742696	0.0376378	1	4.27666	IND	MYOM2
MGLL	211026_s_at	11343	0.435954	0.104679	0.258967	-3.83892	2.22014e-05	0.000406678	4	4.27487	repr		MGLL
RANBP5	211952_at	3843	-2.16459	9.68766e-05	0.00991172	2.10434	7.80295e-06	0.000167847	1	4.26893	IND			RANBP5
VCAN	221731_x_at	1462	1.70408	0.0662745	0.198204	-2.55752	0.0625524	0.17794	4	4.26161	repr
SNX7	205573_s_at	51375	-1.39751	0.00654569	0.0535377	-2.86044	0.000229412	0.00261537	3	4.25795	repr
CD59	200984_s_at	966	1.29576	0.000391034	0.016054	-2.96149	0.000858369	0.00739017	4	4.25725	repr
LARP6	218651_s_at	55323	1.84886	0.00526233	0.0474182	-2.40766	0.00370249	0.0226071	4	4.25652	repr
CASQ2	207317_s_at	845	0.0336583	0.89465	0.943404	-4.21416	9.03271e-07	2.76244e-05	5	4.24782	repr
CBLB	209682_at	868	1.00837	0.00503234	0.0467602	-3.23118	4.70275e-07	1.60578e-05	4	4.23955	repr
MLLT11	211071_s_at	10962	0.807739	0.0674122	0.19999	3.43023	0.00820369	0.040523	2	4.23796	IND
KANK1	213005_s_at	23189	0.971664	0.0996927	0.25107	-3.26193	0.000114722	0.00151683	4	4.2336	repr
DDB2	203409_at	1643	-2.06729	0.000454802	0.01679	2.16288	0.00046345	0.0045657	1	4.23017	IND
CYP26B1	219825_at	56603	-1.88302	0.0451481	0.156285	2.34314	0.00471564	0.027096	1	4.22616	IND
LPHN1	47560_at	22859	-0.571466	0.230819	0.412181	3.65355	3.43809e-09	2.49315e-07	1	4.22502	IND
PEA15	200788_s_at	8682	2.38255	0.000648307	0.0183879	-1.83778	0.0272812	0.0970152	4	4.22033	repr		PEA15
STEAP3	218424_s_at	55240	-1.31435	0.00351488	0.0398127	2.90397	0.000319577	0.00342146	1	4.21831	IND
LEPR	209894_at	3953	0.383236	0.345213	0.534836	-3.83051	1.03884e-06	3.09628e-05	4	4.21374	repr
G6PC	217289_s_at	2538	-3.40327	0.000202338	0.0119601	0.809137	0.201474	0.396188	1	4.21241	IND
HIST1H2AC	215071_s_at	8334	0.654192	0.414092	0.601358	3.54908	0.000209341	0.00244197	2	4.20327	IND
PTPN13	204201_s_at	5783	-1.42415	0.000591134	0.0178795	2.77709	4.78829e-09	3.36809e-07	1	4.20124	IND	PTPN13
TTK	204822_at	7272	-1.83983	0.022573	0.104254	2.35948	0.00227028	0.0156254	1	4.19931	IND
PANX1	204715_at	24145	0.0879315	0.749473	0.852903	-4.10313	1.57484e-33	1.10774e-29	5	4.19106	repr
INPP1	202794_at	3628	1.40865	0.00415373	0.0420393	-2.7793	0.000717283	0.00641905	4	4.18794	repr
CD55	201926_s_at	1604	1.11062	0.0718558	0.206806	-3.0773	0.000147518	0.00184963	4	4.18791	repr
SMC2	204240_s_at	10592	-2.85286	0.00285979	0.0366995	1.33062	0.0426013	0.135102	1	4.18348	IND	SMC2
DUT	208955_at	1854	-3.31157	1.49568e-05	0.00657538	0.869584	0.169978	0.353735	1	4.18115	IND
ASS1	207076_s_at	445	2.33307	0.00357089	0.04006	-1.84266	0.0801559	0.211597	4	4.17573	repr		ASS1
TMEM97	212281_s_at	27346	-1.09967	0.00500413	0.0465596	3.07484	0.00146263	0.0111223	1	4.1745	IND	TMEM97
SALL2	213283_s_at	6297	-1.16214	0.0204166	0.0979555	3.01018	6.19927e-07	2.00026e-05	1	4.17232	IND	SALL2
LMO2	204249_s_at	4005	-0.135456	0.771763	0.867186	4.03402	1.50741e-05	0.000294864	1	4.16948	IND
DCN	201893_x_at	1634	0.661354	0.534763	0.699818	-3.49688	0.0382163	0.125321	4	4.15823	repr
FNBP1	213940_s_at	23048	-1.69905	0.00278596	0.0364365	2.45817	0.000508562	0.00494092	1	4.15722	IND	FNBP1
C10orf10	209183_s_at	11067	-0.313367	0.521792	0.689645	-3.83285	0.000111262	0.00148279	3	4.14622	repr
ESPL1	204817_at	9700	-2.97615	0.000208085	0.0120282	1.16726	0.0378802	0.124684	1	4.14341	IND
EPHA4	206114_at	2043	1.1349	0.106604	0.26109	2.99707	3.1481e-06	7.71558e-05	2	4.13197	IND
JAG1	216268_s_at	182	2.44132	0.00929818	0.0645641	-1.68945	0.0199312	0.0778002	4	4.13077	repr
CDC2	203214_x_at	983	-2.64617	0.0151503	0.0839771	1.48446	0.0961784	0.23956	1	4.13063	IND
HELLS	220085_at	3070	-2.32908	0.00204666	0.0312961	1.79846	0.000904974	0.00766617	1	4.12754	IND	HELLS
UPP1	203234_at	7378	1.74293	0.037958	0.141869	-2.37443	0.00194299	0.0139317	4	4.11737	repr
LGALS3	208949_s_at	3958	0.65582	0.260757	0.447979	-3.45958	0.00152773	0.0115301	4	4.1154	repr
PLCXD1	218951_s_at	55344	-1.72747	0.00171319	0.0288007	2.38434	5.13557e-08	2.52612e-06	1	4.11181	IND
CYLD	221903_s_at	1540	1.40039	0.00694446	0.0556036	-2.70448	0.00135598	0.0106096	4	4.10488	repr
CTSL1	202087_s_at	1514	1.04245	0.0452219	0.156445	-3.06229	8.14388e-07	2.50149e-05	4	4.10474	repr
CD24	209771_x_at	934	4.03367	0.000208621	0.0120282	0.0665922	0.965313	0.984488	5	4.10026	IND
RFC5	203210_s_at	5985	-3.6187	0.000108346	0.0102987	0.480465	0.253776	0.457238	1	4.09916	IND	RFC5
STMN1	200783_s_at	3925	-0.921156	0.0479114	0.162023	3.17542	4.02318e-07	1.39404e-05	1	4.09658	IND
GSTM4	204149_s_at	2948	-2.81114	0.00272048	0.0363109	1.2822	0.0141165	0.060179	1	4.09333	IND	GSTM4
WNT5A	205990_s_at	7474	-1.73296	0.0272588	0.116914	2.35319	7.46796e-05	0.00107203	1	4.08616	IND
TMEM100	219230_at	55273	-0.762683	0.199595	0.377813	-3.32148	1.46562e-05	0.000287966	3	4.08416	repr			TMEM100
PAPSS2	203060_s_at	9060	0.767109	0.0971601	0.247438	-3.31403	0.000372244	0.00385054	4	4.08114	repr		PAPSS2
SLC26A2	205097_at	1836	-2.06798	0.00673602	0.0545866	2.01186	0.0198345	0.0775436	1	4.07984	IND
NEU1	208926_at	4758	2.28272	7.50495e-05	0.00991172	-1.78817	0.000210675	0.00245345	4	4.07089	repr
MAN1A1	221760_at	4121	0.370214	0.135481	0.299112	-3.70003	1.22593e-07	5.29029e-06	4	4.07025	repr
COPZ2	219561_at	51226	0.23067	0.554397	0.71448	-3.83904	8.91634e-10	7.35179e-08	4	4.06971	repr
TROAP	204649_at	10024	-2.99929	0.00156236	0.027962	1.06991	0.0156013	0.0648578	1	4.0692	IND		TROAP
UBE2C	202954_at	11065	-1.51847	0.0192978	0.0951548	2.54498	0.000330178	0.00351799	1	4.06345	IND
GALNT1	201724_s_at	2589	2.18009	0.000182683	0.0114732	-1.88149	0.00538918	0.0299191	4	4.06158	repr		GALNT1
MT1H	206461_x_at	4496	1.06468	0.00445726	0.0436332	-2.99551	0.000323084	0.00345376	4	4.06019	repr
WASF1	204165_at	8936	-1.01474	0.0040589	0.0419118	3.0437	0.000136355	0.00174386	1	4.05843	IND	WASF1
MYO10	216222_s_at	4651	-2.96538	0.000291008	0.0139248	1.09025	0.03688	0.122423	1	4.05563	IND	MYO10
CACNB2	213714_at	783	-1.67385	0.0104475	0.0680441	2.38094	0.000764656	0.00674009	1	4.05479	IND	CACNB2		CACNB2
H2AFY2	218445_at	55506	-1.25551	0.0134908	0.0788447	2.79895	1.91858e-12	4.22871e-10	1	4.05446	IND	H2AFY2
CHD3	208806_at	1107	-0.671687	0.182787	0.358455	3.38138	1.61179e-10	1.8439e-08	1	4.05307	IND
COLEC12	221019_s_at	81035	1.22804	0.19047	0.36737	-2.82448	1.81934e-05	0.00034309	4	4.05253	repr
DSE	218854_at	29940	0.572151	0.179584	0.354233	-3.47629	3.94734e-09	2.82423e-07	4	4.04844	repr
CDC25B	201853_s_at	994	-1.72366	0.00170758	0.0288007	2.32015	0.0130998	0.0570905	1	4.0438	IND		CDC25B
SLC39A14	212110_at	23516	0.573164	0.271884	0.459499	-3.46495	0.000105265	0.00141845	4	4.03811	repr
MCM10	220651_s_at	55388	-3.88809	3.42211e-05	0.00891522	-0.149949	0.726801	0.85962	3	4.03804	repr	MCM10
ATP1B1	201243_s_at	481	2.12825	0.000231187	0.012682	-1.90011	0.186025	0.375787	4	4.02836	repr		ATP1B1
MT1E	212859_x_at	4493	1.10891	0.0182194	0.0926647	-2.91814	0.0086388	0.0420146	4	4.02705	repr
CCDC109B	218802_at	55013	-1.76713	0.0102624	0.0672744	-2.25873	0.0125383	0.0553336	3	4.02586	repr
MT1F	217165_x_at	4494	1.11403	0.00996486	0.0665649	-2.90905	0.00571482	0.0311331	4	4.02308	repr
NR3C1	201865_x_at	2908	1.02863	0.0960263	0.245439	-2.99145	6.79094e-05	0.00100678	4	4.02008	repr		NR3C1
RGS5	209071_s_at	8490	3.37813	0.00806569	0.0600361	-0.640687	0.528364	0.715677	4	4.01882	repr		RGS5
LOC728411	213605_s_at	728411	-0.0919428	0.820076	0.900267	3.92077	6.27271e-08	2.97155e-06	5	4.01271	IND
LAMB2	216264_s_at	3913	1.1956	0.00405383	0.0419118	-2.81478	0.000205196	0.00240017	4	4.01038	repr
MYLK	202555_s_at	4638	0.912031	0.532495	0.698232	-3.09676	0.00406001	0.0242106	4	4.00879	repr
UCP2	208998_at	7351	-1.58164	0.000548663	0.0174711	2.42407	0.0527402	0.157192	1	4.00571	IND
ADFP	209122_at	123	-0.250347	0.290528	0.480729	-3.75473	7.42696e-05	0.00106833	3	4.00508	repr
RP4-691N24.1	207705_s_at	22981	-0.762834	0.0842403	0.226792	3.2215	9.29205e-09	5.88831e-07	1	3.98433	IND
CUGBP2	202157_s_at	10659	0.216487	0.348729	0.538047	-3.76209	0.000301427	0.00324692	4	3.97858	repr
PDSS1	220865_s_at	23590	-2.53912	0.00127249	0.0257338	1.43928	0.00664186	0.0346066	1	3.9784	IND	PDSS1
PCDH9	219737_s_at	5101	1.0266	0.0890595	0.234238	-2.94794	0.00343642	0.0214826	4	3.97454	repr
FAM3C	201889_at	10447	1.38331	0.00269359	0.0363109	-2.58912	0.000190745	0.00225875	4	3.97243	repr		FAM3C
NME4	212739_s_at	4833	-1.29649	0.000726716	0.0193626	2.67538	8.61438e-05	0.00119987	1	3.97187	IND
IGSF3	202421_at	3321	-1.79107	0.00706108	0.055932	2.177	0.000701775	0.00633358	1	3.96807	IND
RCOR1	212612_at	23186	-1.11356	0.00402543	0.0419118	2.84795	2.92734e-08	1.52526e-06	1	3.96151	IND	RCOR1
NCAPG	218663_at	64151	-2.44693	0.0012281	0.0253071	1.51371	0.00340084	0.0213585	1	3.96064	IND
AKT3	212607_at	10000	-0.0443275	0.937571	0.965433	-3.91239	1.76278e-07	7.29378e-06	5	3.95671	repr		AKT3
COQ10B	219397_at	80219	0.723135	0.0246595	0.109851	-3.23112	3.97496e-09	2.82423e-07	4	3.95426	repr
PTGER4	204897_at	5734	-0.169389	0.752221	0.85415	-3.78463	0.000244344	0.00275848	3	3.95402	repr
SCG2	204035_at	7857	-0.224624	0.796816	0.884038	3.72366	0.0031378	0.0200831	1	3.94829	IND
CKAP2	218252_at	26586	-1.658	0.00697057	0.0556538	2.2892	0.000259316	0.00289988	1	3.9472	IND
RGS2	202388_at	5997	1.57948	0.0229707	0.105278	-2.35992	0.0509213	0.152807	4	3.9394	repr
HOXB13	209844_at	10481	-1.4481	0.177054	0.351211	2.48453	0.000968328	0.00807974	1	3.93263	IND
DST	212254_s_at	667	1.9132	0.000603838	0.0178795	-2.01905	0.0461375	0.142436	4	3.93225	repr
SLC5A6	204087_s_at	8884	-2.29951	0.0011571	0.0247388	1.63103	0.000829339	0.00717536	1	3.93054	IND	SLC5A6
QSOX1	201482_at	5768	2.32612	2.58355e-05	0.00762237	-1.60326	0.00596744	0.0319444	4	3.92937	repr
HJURP	218726_at	55355	-2.5697	0.021497	0.101415	1.34774	0.0145342	0.0612534	1	3.91744	IND
VCL	200931_s_at	7414	1.71047	0.00999462	0.066574	-2.20207	0.00981797	0.046132	4	3.91254	repr
FBLN1	202994_s_at	2192	0.219947	0.62105	0.762119	-3.69008	1.75344e-05	0.000333343	4	3.91002	repr
SLC5A3	212944_at	6526	1.69614	0.00248599	0.0347425	-2.21301	0.00170549	0.0125862	4	3.90915	repr
BLM	205733_at	641	-2.66541	6.41716e-05	0.00991172	1.24222	0.0593726	0.17158	1	3.90762	IND	BLM
NEUROD6	220045_at	63974	-2.08347	0.0880595	0.232424	1.81935	0.0193225	0.0760574	1	3.90282	IND			NEUROD6
XBP1	200670_at	7494	1.5116	0.00950319	0.0650247	-2.38987	0.000721192	0.00643677	4	3.90147	repr		XBP1
ANXA1	201012_at	301	1.04693	0.106263	0.260728	-2.85368	0.033962	0.1148	4	3.90061	repr
AHNAK	211986_at	79026	1.5893	0.00772445	0.0585493	-2.30284	0.0351793	0.117946	4	3.89214	repr
SCPEP1	218217_at	59342	0.683479	0.0481769	0.162531	-3.20864	3.02144e-07	1.12583e-05	4	3.89212	repr		SCPEP1
SLC37A4	202830_s_at	2542	-2.97206	0.000165607	0.0114732	0.919196	0.139153	0.308863	1	3.89126	IND	SLC37A4
RIT1	209882_at	6016	2.79651	1.48035e-05	0.00657538	-1.08871	0.00352855	0.0218505	4	3.88521	repr
SLC30A1	212907_at	7779	1.54905	0.0778077	0.216348	-2.32596	0.000570316	0.00542108	4	3.87501	repr
OIP5	213599_at	11339	-2.93546	0.000913571	0.0214678	0.938161	0.134812	0.302575	1	3.87362	IND
RBMS1	209868_s_at	5937	1.76257	0.00242785	0.0345	-2.10847	0.0237761	0.0880679	4	3.87104	repr		RBMS1
HIP1R	38340_at	9026	-0.545635	0.197136	0.374905	3.32522	2.20376e-07	8.80753e-06	1	3.87085	IND	HIP1R
PRRX1	205991_s_at	5396	1.0867	0.039287	0.144607	-2.77883	0.000147887	0.00185095	4	3.86553	repr	PRRX1
MEIS1	204069_at	4211	-2.00247	0.000451068	0.01679	1.85932	0.0166545	0.0678724	1	3.86179	IND	MEIS1
LRRC17	205381_at	10234	1.58704	0.0592063	0.184764	-2.27376	0.00355641	0.0219903	4	3.8608	repr		LRRC17
MICAL2	212473_s_at	9645	1.29913	0.0632055	0.192963	-2.56111	0.0203967	0.0789051	4	3.86024	repr
ENPP2	209392_at	5168	0.305689	0.728415	0.8392	-3.5518	0.00591589	0.0317409	4	3.85749	repr
PADI2	209791_at	11240	-0.981172	0.0714088	0.206092	2.87168	0.00453012	0.0263129	1	3.85285	IND	PADI2
PTPN12	202006_at	5782	1.16857	0.0104844	0.0680956	-2.66935	2.85011e-06	7.2114e-05	4	3.83792	repr		PTPN12
MT1P2	211456_x_at	645745	1.25596	0.000579621	0.0178795	-2.58087	0.000991411	0.00822363	4	3.83683	repr
PGCP	208454_s_at	10404	0.977053	0.00453211	0.0439103	-2.85914	5.12576e-10	4.56387e-08	4	3.83619	repr
NDUFA7	202785_at	4701	-1.09193	0.00732749	0.0570782	2.74335	8.20452e-05	0.00115653	1	3.83528	IND
KIF14	206364_at	9928	-1.96419	0.00826389	0.0607313	1.86739	0.000495592	0.00484166	1	3.83158	IND	KIF14
BCL6	203140_at	604	-0.922912	0.187516	0.36416	-2.90557	0.00281258	0.0183863	3	3.82848	repr
FTH1	214211_at	2495	2.23834	0.00213813	0.0318422	-1.5901	0.0506711	0.152252	4	3.82845	repr
KIF2C	211519_s_at	11004	-3.10229	0.00127789	0.0257338	0.720824	0.331408	0.541069	1	3.82312	IND	KIF2C
SERPINE2	212190_at	5270	2.91211	0.000179385	0.0114732	-0.910226	0.436342	0.637298	4	3.82234	repr
ALG6	219649_at	29929	-2.39221	0.000214627	0.0122335	1.42945	0.00504838	0.0285912	1	3.82167	IND
SLC29A1	201801_s_at	2030	-3.73566	7.89887e-07	0.00265296	0.0852209	0.89509	0.949517	5	3.82088	IND
POLE2	205909_at	5427	-3.1062	2.71819e-06	0.00265296	0.709592	0.168738	0.351987	1	3.8158	IND	POLE2
CYB5A	207843_x_at	1528	-1.16153	0.00571733	0.0498531	-2.6499	0.00270354	0.0178901	3	3.81143	repr
GNAI1	209576_at	2770	2.06105	0.000180679	0.0114732	-1.7444	0.000365404	0.00379408	4	3.80545	repr
RACGAP1	222077_s_at	29127	-1.33402	0.0429304	0.152252	2.46522	0.000868251	0.00745699	1	3.79924	IND
TPST1	204140_at	8460	0.280275	0.259998	0.447148	-3.51016	1.11264e-12	2.89864e-10	4	3.79043	repr
PEG3	209242_at	5178	-0.961376	0.0707762	0.205634	2.82018	0.0504449	0.151766	1	3.78155	IND	PEG3
HERPUD1	217168_s_at	9709	1.71737	0.00375206	0.0409448	-2.06164	0.000401903	0.00408821	4	3.77901	repr
PFKFB3	202464_s_at	5209	0.240717	0.445922	0.629338	-3.53701	1.69847e-08	9.96363e-07	4	3.77773	repr
JUN	201464_x_at	3725	1.3913	0.0631652	0.192963	-2.38312	0.0103625	0.0478592	4	3.77442	repr
NAIP	204860_s_at	4671	-1.16665	0.0743136	0.211286	2.6068	0.000365708	0.00379408	1	3.77345	IND
NRP1	210510_s_at	8829	1.2852	0.00348398	0.0397657	-2.48341	8.81196e-08	3.98436e-06	4	3.76861	repr
INA	204465_s_at	9118	2.4453	0.00538359	0.0482398	1.32044	0.343385	0.552844	2	3.76575	IND		INA
METTL7A	207761_s_at	25840	-2.6384	0.00488398	0.0457442	-1.12435	0.269831	0.475179	3	3.76275	repr
SMURF2	205596_s_at	64750	1.00309	0.0765075	0.214918	-2.75689	2.52484e-05	0.000453054	4	3.75998	repr
RMI1	218979_at	80010	-1.61928	0.00516519	0.0471985	2.14008	1.67583e-07	7.14412e-06	1	3.75936	IND	RMI1
SULF1	212354_at	23213	1.40861	0.0730873	0.209363	-2.35054	0.00173544	0.0127503	4	3.75915	repr			SULF1
COQ2	213379_at	27235	-1.56217	0.00011245	0.0104075	2.19084	6.63449e-05	0.000990749	1	3.75302	IND
TSPAN13	217979_at	27075	-0.135135	0.68489	0.810621	3.61733	0.000132164	0.00170264	1	3.75247	IND
PER2	205251_at	8864	-0.221787	0.50256	0.674878	-3.52097	1.27394e-11	2.1487e-09	3	3.74275	repr
HLA-DRB1	209312_x_at	3123	0.05957	0.794192	0.882659	3.67844	0.011883	0.0532667	5	3.73801	IND
LTBP1	202729_s_at	4052	2.22808	0.00192387	0.0306785	-1.50957	0.0343386	0.11579	4	3.73765	repr
MCM7	210983_s_at	4176	-1.81315	0.00468134	0.0445267	1.924	0.0477511	0.145782	1	3.73716	IND	MCM7
DDR1	207169_x_at	780	0.556629	0.150824	0.319117	3.17921	0.00119709	0.00963426	2	3.73584	IND
TNXB	206093_x_at	7148	0.0576564	0.786071	0.876263	-3.67209	3.6151e-07	1.27782e-05	5	3.72974	repr
PDGFA	205463_s_at	5154	1.59705	0.0226767	0.104458	-2.13258	0.00267852	0.0177742	4	3.72963	repr
DUSP6	208893_s_at	1848	2.70844	0.00202723	0.031203	1.01274	0.340711	0.549855	2	3.72118	IND			DUSP6
WASF3	204042_at	10810	0.70751	0.0485042	0.163009	-3.01282	0.0015131	0.0114443	4	3.72033	repr
GPSN2	208336_s_at	9524	-1.65939	0.000702496	0.0190052	2.05857	0.00381808	0.0231195	1	3.71797	IND
AMPH	205257_s_at	273	-1.00579	0.0940221	0.242342	-2.71188	0.00883097	0.0426043	3	3.71767	repr
SH3BP5	201811_x_at	9467	1.41285	0.00415178	0.0420393	-2.30461	0.00548163	0.0302889	4	3.71745	repr
GPC4	204984_at	2239	0.99291	0.0756702	0.213376	-2.72235	3.18904e-18	3.20453e-15	4	3.71526	repr
AURKA	208079_s_at	6790	-1.76134	0.00819008	0.0605773	1.95273	0.00637879	0.0334839	1	3.71407	IND	AURKA
NRIP1	202599_s_at	8204	0.423114	0.13803	0.302367	-3.286	6.03629e-07	1.95665e-05	4	3.70912	repr
SLIT3	203812_at	6586	0.200728	0.345762	0.534878	-3.50819	3.46374e-19	4.06066e-16	4	3.70892	repr
MYLIP	220319_s_at	29116	0.969687	0.0714252	0.206092	-2.73768	0.000125163	0.00162735	4	3.70737	repr
CCNA2	203418_at	890	-2.92978	0.00171401	0.0288007	0.776192	0.256806	0.460106	1	3.70597	IND
RBP1	203423_at	5947	-0.481102	0.368086	0.557159	3.22237	0.00173653	0.0127503	1	3.70347	IND
BIRC5	210334_x_at	332	-3.30617	0.000729774	0.0193707	0.396575	0.350071	0.560273	1	3.70274	IND	BIRC5
PFAS	213302_at	5198	-2.09095	0.00018252	0.0114732	1.60382	0.00267327	0.0177562	1	3.69478	IND	PFAS
NAMPT	217738_at	10135	1.34198	0.0692092	0.202925	-2.35215	0.00236116	0.0161538	4	3.69412	repr
ZYX	215706_x_at	7791	2.05816	0.00105761	0.0231752	1.63089	0.0203343	0.0788052	2	3.68904	IND
SCHIP1	204030_s_at	29970	0.549031	0.226652	0.40809	-3.13849	0.00147833	0.0112296	4	3.68752	repr		SCHIP1
CENPE	205046_at	1062	-2.14117	0.025743	0.113173	1.54635	0.00938808	0.0446365	1	3.68752	IND
GULP1	204235_s_at	51454	0.817285	0.0856587	0.228835	-2.87022	1.72037e-07	7.20301e-06	4	3.68751	repr		GULP1
FAT4	219427_at	79633	0.284406	0.445378	0.629134	3.39807	7.44902e-14	2.49507e-11	2	3.68248	IND
SMA5	215043_s_at	11042	-0.824403	0.0185158	0.0932063	2.85449	8.98854e-10	7.35179e-08	1	3.67889	IND
LTA4H	208771_s_at	4048	-1.37287	0.00271885	0.0363109	2.30534	0.00849045	0.041589	1	3.67821	IND
SCRG1	205475_at	11341	3.41399	0.000293704	0.0139589	0.262925	0.822738	0.913365	2	3.67691	IND			SCRG1
RRBP1	201206_s_at	6238	2.34532	0.000126435	0.0108146	-1.32823	0.022888	0.0853627	4	3.67355	repr
ACVR2A	205327_s_at	92	0.478857	0.11045	0.265973	-3.18929	2.59965e-26	9.14298e-23	4	3.66815	repr
AKAP12	210517_s_at	9590	-0.264223	0.551771	0.712923	-3.40264	0.000383555	0.00394385	3	3.66687	repr		AKAP12
RHOB	212099_at	388	2.60669	0.0114417	0.0711966	-1.05959	0.353921	0.563603	4	3.66628	repr
SLC19A2	209681_at	10560	0.3315	0.341264	0.531662	-3.32976	1.09838e-07	4.82877e-06	4	3.66126	repr
CELSR2	204029_at	1952	-0.77986	0.0190402	0.0945827	2.88065	0.000344871	0.00363876	1	3.66051	IND	CELSR2
EMP2	204975_at	2013	-1.13909	0.0269227	0.116209	-2.50798	0.00270652	0.0178901	3	3.64707	repr
YAP1	213342_at	10413	0.599198	0.192454	0.369263	-3.04604	1.62393e-12	3.80758e-10	4	3.64524	repr
ATP2B1	215716_s_at	490	2.26135	0.000191716	0.0116294	-1.37963	0.00529784	0.0296224	4	3.64097	repr
CIT	212801_at	11113	-2.32211	0.0032034	0.0382558	1.31492	0.0478352	0.145944	1	3.63704	IND
SIRPA	202897_at	140885	-1.58799	0.00135757	0.0264359	2.04559	0.0351048	0.117753	1	3.63358	IND	SIRPA
CFHR1	215388_s_at	3078	0.0174193	0.951563	0.973303	-3.61382	1.50789e-06	4.1923e-05	5	3.63124	repr
IL6ST	212195_at	3572	1.49047	0.00278239	0.0364365	-2.13854	0.00519523	0.0291959	4	3.62901	repr		IL6ST
KLF7	204334_at	8609	0.978774	0.00194963	0.0307483	-2.64809	4.25243e-06	0.000100039	4	3.62686	repr
ARTN	207675_x_at	9048	-0.681981	0.0490953	0.164133	2.93918	4.04884e-05	0.000662315	1	3.62116	IND
INSIG1	201626_at	3638	0.560997	0.408187	0.595806	-3.06002	3.8009e-06	9.09372e-05	4	3.62102	repr
OSR2	213568_at	116039	1.12446	0.119341	0.277136	-2.48181	3.73439e-06	8.99579e-05	4	3.60627	repr
LAMA2	205116_at	3908	-0.233737	0.324126	0.515465	-3.37234	1.45283e-14	6.01131e-12	3	3.60608	repr
POLD3	212836_at	10714	-2.39858	0.000490394	0.0170891	1.20337	0.00798972	0.0398297	1	3.60195	IND	POLD3
MRP63	204386_s_at	78988	-1.46505	0.00342999	0.0394633	2.13644	3.22221e-05	0.000543525	1	3.60148	IND
MMP1	204475_at	4312	3.00597	0.0170669	0.0901529	0.595292	0.523413	0.7113	2	3.60126	IND
GAS6	202177_at	2621	0.120438	0.712993	0.829145	-3.48042	2.63143e-08	1.40223e-06	4	3.60086	repr
SPARCL1	200795_at	8404	3.1556	0.00122008	0.0253071	-0.445048	0.799151	0.902294	4	3.60065	repr
GRK5	204395_s_at	2869	-2.03623	0.00158804	0.0280041	1.55988	0.00200136	0.0142516	1	3.59611	IND	GRK5		GRK5
USP13	205356_at	8975	-1.65505	0.000601101	0.0178795	1.93797	0.00373109	0.0227422	1	3.59302	IND
FAM46A	221766_s_at	55603	1.76586	0.0060087	0.0514175	-1.81864	0.0553052	0.162905	4	3.5845	repr
IMPAD1	218516_s_at	54928	0.706143	0.113539	0.270082	-2.87829	1.25204e-14	5.50427e-12	4	3.58443	repr
MARCKS	201668_x_at	4082	2.81725	0.00572666	0.0498531	-0.762328	0.1875	0.377559	4	3.57958	repr		MARCKS
PROS1	207808_s_at	5627	0.859565	0.0359924	0.137774	-2.71958	6.89261e-05	0.00101428	4	3.57915	repr		PROS1
C8orf70	205308_at	51101	0.985531	0.002786	0.0364365	-2.59095	2.10542e-08	1.19432e-06	4	3.57648	repr
ITM2A	202747_s_at	9452	-1.30555	0.0180237	0.0922029	2.26556	0.00574279	0.0311801	1	3.57111	IND
LMCD1	218574_s_at	29995	1.02012	0.213954	0.394276	-2.54647	0.0035899	0.0220729	4	3.56658	repr
IDH2	210046_s_at	3418	-0.927499	0.0034583	0.0396183	2.63746	0.00417684	0.0247722	1	3.56496	IND
OSBPL10	219073_s_at	114884	0.761513	0.0243741	0.109526	-2.79732	9.27534e-06	0.000190212	4	3.55883	repr
KLHL21	203068_at	9903	0.623309	0.0460728	0.157932	-2.92587	2.16459e-12	4.47816e-10	4	3.54918	repr
C14orf139	219563_at	79686	0.396433	0.182003	0.357219	-3.14697	0.000204551	0.00240017	4	3.5434	repr
PLS3	201215_at	5358	0.561214	0.0422153	0.150596	-2.98101	0.00769385	0.0386838	4	3.54222	repr		PLS3
PLAGL1	209318_x_at	5325	0.0550319	0.823138	0.902424	-3.48612	4.26605e-05	0.000688242	5	3.54115	repr
PDS5B	207956_x_at	23047	-1.12781	0.0346224	0.134698	2.40957	0.000288548	0.00313277	1	3.53738	IND
USP3	221654_s_at	9960	0.448496	0.18167	0.356747	-3.07754	0.000590104	0.00557101	4	3.52604	repr
IMPA2	203126_at	3613	-3.28195	2.1577e-06	0.00265296	0.230276	0.823476	0.913617	1	3.51223	IND
TSPAN8	203824_at	7103	-0.373965	0.619512	0.761331	3.13813	0.00572558	0.0311475	1	3.5121	IND
IGF2	202409_at	3481	-0.360658	0.368566	0.557645	-3.15031	0.0265612	0.095275	3	3.51097	repr
PHKA2	209439_s_at	5256	-0.984832	0.0105491	0.0683261	2.52433	4.89825e-09	3.41132e-07	1	3.50916	IND
CYP1B1	202436_s_at	1545	0.949233	0.0260216	0.113616	-2.55823	0.00902302	0.0433228	4	3.50746	repr
TRIB1	202241_at	10221	-0.867437	0.188492	0.364846	-2.63916	0.00891857	0.0428799	3	3.50659	repr	TRIB1
GPX7	213170_at	2882	-1.09694	0.00780304	0.0587132	2.40529	8.63629e-06	0.000179844	1	3.50224	IND
GYS1	201673_s_at	2997	-2.06117	0.000788185	0.020308	1.44	0.0346445	0.116593	1	3.50117	IND
NCAPG2	219588_s_at	54892	-2.21962	0.00142527	0.0268867	1.28043	0.0118892	0.0532667	1	3.50005	IND
TP53I3	210609_s_at	9540	0.623946	0.0466863	0.159104	-2.86752	3.11217e-08	1.59788e-06	4	3.49146	repr
MRPL22	218339_at	29093	-1.06251	0.00114739	0.0246299	2.42628	6.00624e-05	0.000910053	1	3.48879	IND
LDLR	202068_s_at	3949	0.889863	0.0262298	0.114242	-2.59776	0.0144036	0.0610802	4	3.48762	repr
DDAH2	214909_s_at	23564	1.81408	0.00248937	0.0347425	-1.67213	0.000591613	0.00557101	4	3.4862	repr
CTSA	200661_at	5476	1.69061	0.000103874	0.0101479	-1.79401	0.0326704	0.111827	4	3.48462	repr
SQSTM1	201471_s_at	8878	1.72636	0.00269744	0.0363109	-1.75359	7.89871e-05	0.0011179	4	3.47995	repr
MARCKSL1	200644_at	65108	0.108154	0.678326	0.805462	3.36509	1.30422e-05	0.00025842	2	3.47324	IND
EHD2	221870_at	30846	0.881642	0.0340687	0.13343	-2.59043	0.000299994	0.00323644	4	3.47207	repr
NRD1	208709_s_at	4898	-1.50535	0.0271599	0.116632	1.96393	0.000138464	0.00176441	1	3.46928	IND
CENPF	209172_s_at	1063	-1.68915	0.0134076	0.0786565	1.77925	0.000104361	0.00140898	1	3.4684	IND
UST	205139_s_at	10090	0.897155	0.0595209	0.185499	-2.56833	1.14986e-11	2.03111e-09	4	3.46548	repr
PLSCR4	218901_at	57088	1.76979	0.0172285	0.0903065	-1.69561	0.044232	0.138896	4	3.46539	repr
NEK2	204641_at	4751	-1.67626	0.00922233	0.0642524	1.78785	0.014169	0.0603663	1	3.46411	IND
LEPROT	202377_at	54741	1.12235	0.0014164	0.0268867	-2.33939	0.00402169	0.0240959	4	3.46175	repr
FAM111A	218248_at	63901	-1.55352	0.100977	0.253577	1.9032	0.00765415	0.0385392	1	3.45672	IND
LOC26010	222154_s_at	26010	1.1431	0.00369512	0.040867	-2.31176	0.0099692	0.0466581	4	3.45486	repr
MTHFD1	202309_at	4522	-1.75253	4.11372e-05	0.00923861	1.69848	0.0035237	0.0218505	1	3.45101	IND	MTHFD1
RUVBL1	201614_s_at	8607	-1.59787	0.000180568	0.0114732	1.85264	3.08955e-06	7.65207e-05	1	3.45051	IND
PTPRF	200637_s_at	5792	-1.88877	0.0311881	0.126224	1.55993	0.0446044	0.139505	1	3.4487	IND
TIMP2	203167_at	7077	1.25292	0.00985657	0.0663456	-2.19388	0.00385861	0.0233174	4	3.4468	repr
IVNS1ABP	201362_at	10625	-0.980766	0.00218317	0.0321264	2.45806	0.000548538	0.0052567	1	3.43882	IND	IVNS1ABP
CHSY1	203044_at	22856	1.49656	0.0015817	0.0280041	-1.94208	0.00551431	0.0303743	4	3.43864	repr
PDLIM2	219165_at	64236	0.988203	0.0138069	0.0794746	-2.44275	0.00131017	0.0103304	4	3.43095	repr
PLSCR1	202446_s_at	5359	-0.489322	0.162105	0.33253	-2.93829	0.000296862	0.00320757	3	3.42761	repr
STK32B	219686_at	55351	-1.49481	0.0984973	0.249758	1.92941	0.000355461	0.00371754	1	3.42422	IND	STK32B
KIF18B	222039_at	146909	-2.04091	0.00298555	0.0371688	1.3816	0.0129755	0.0567597	1	3.42251	IND
PLXNA1	221538_s_at	5361	0.905544	0.0528127	0.171214	-2.51507	8.00766e-06	0.000170169	4	3.42062	repr
FAM49A	208092_s_at	81553	-2.5926	0.00661573	0.0540476	0.827633	0.171694	0.355728	1	3.42023	IND	FAM49A
DUSP1	201041_s_at	1843	0.869878	0.0779543	0.21656	-2.54598	0.0246441	0.0905676	4	3.41586	repr
BAT2	212081_x_at	7916	-0.513245	0.0558006	0.177464	2.90261	7.65622e-08	3.54302e-06	1	3.41586	IND
SUCLG2	215772_x_at	8801	-1.23894	0.0114477	0.0711966	-2.17409	0.0014067	0.0108257	3	3.41303	repr
FAS	204780_s_at	355	0.0795435	0.9153	0.953215	-3.33208	2.13589e-07	8.58507e-06	5	3.41162	repr			FAS
HSD17B2	204818_at	3294	2.49338	0.118216	0.275373	0.915259	0.234119	0.435076	2	3.40864	IND
EPB41	214530_x_at	2035	-2.9524	0.00127725	0.0257338	0.453828	0.288863	0.495767	1	3.40623	IND	EPB41
IER5	218611_at	51278	0.704215	0.0292854	0.122034	-2.70123	0.00263419	0.0175131	4	3.40545	repr
CDR2	209501_at	1039	1.01042	0.0224339	0.103884	-2.39002	1.87513e-06	5.01507e-05	4	3.40044	repr
PRR3	204795_at	80742	-1.56262	0.00147046	0.027219	1.8375	6.64819e-05	0.000990749	1	3.40012	IND			PRR3
HAP1	211222_s_at	9001	-1.52618	0.0350628	0.135716	1.87294	0.00549018	0.0303123	1	3.39913	IND	HAP1
ENPP1	205066_s_at	5167	-1.26339	0.0230626	0.105523	2.1354	0.00299553	0.0193486	1	3.39879	IND
GSTM2	204418_x_at	2946	-1.63764	0.0110079	0.0701355	1.75962	0.00463217	0.026751	1	3.39726	IND	GSTM2
MSH6	211450_s_at	2956	-1.77774	0.000518676	0.0171355	1.61613	0.017248	0.0696857	1	3.39387	IND	MSH6
PXMP2	219076_s_at	5827	-1.58481	0.000828332	0.0208089	1.80465	0.00144065	0.0109908	1	3.38946	IND	PXMP2
BUB1	209642_at	699	-2.4271	0.00461464	0.0443434	0.959134	0.119338	0.278319	1	3.38623	IND	BUB1
PTTG1	203554_x_at	9232	-1.49755	0.00838091	0.0610966	1.88578	0.108603	0.261078	1	3.38333	IND
COL4A2	211966_at	1284	1.94517	0.0111256	0.0704011	-1.43452	0.225124	0.425449	4	3.37969	repr
SYCP1	206740_x_at	6847	-0.937225	0.278581	0.466335	2.429	0.00723098	0.0369373	1	3.36622	IND
PCOLCE	202465_at	5118	0.156175	0.639161	0.776747	-3.20825	3.11462e-06	7.66298e-05	4	3.36443	repr
LIMCH1	212327_at	22998	2.17769	0.0544976	0.17488	-1.18437	0.226309	0.426457	4	3.36206	repr
GSTM1	204550_x_at	2944	-1.74035	0.00317257	0.038212	1.61609	0.00357055	0.0220309	1	3.35644	IND	GSTM1
LOC389168	215780_s_at	389168	-1.0151	0.00230544	0.0331625	2.34111	0.00256841	0.0172248	1	3.35621	IND
SH3GL3	205637_s_at	6457	-2.08878	0.0139883	0.0800598	1.2625	0.284151	0.490332	1	3.35128	IND	SH3GL3
PTOV1	212032_s_at	53635	-0.528565	0.153313	0.322682	2.8191	1.80471e-05	0.000341246	1	3.34766	IND
STX3	209238_at	6809	2.24263	0.000440639	0.0165746	-1.10282	0.0328119	0.112202	4	3.34545	repr
FANCG	203564_at	2189	-2.35473	0.00148606	0.0273637	0.987896	0.0583099	0.169344	1	3.34263	IND
GP1BB	206655_s_at	2812	-0.874591	0.0111801	0.0704626	2.46606	0.00104987	0.00864728	1	3.34065	IND
AGBL5	218480_at	60509	-1.09455	0.00186785	0.0299729	2.24537	0.000453465	0.0044925	1	3.33992	IND
CTSK	202450_s_at	1513	0.689803	0.233315	0.415515	-2.64956	0.00958793	0.0454457	4	3.33937	repr
NID1	202007_at	4811	1.1282	0.0104686	0.0680809	-2.20857	0.0125514	0.0553522	4	3.33677	repr
RAD54B	219494_at	25788	-1.9337	0.00861154	0.0617497	1.40158	0.000980653	0.00815356	1	3.33529	IND	RAD54B
ZC3HAV1	213051_at	56829	0.40534	0.137129	0.301427	-2.92778	0.00173208	0.0127442	4	3.33312	repr
ARRB2	203388_at	409	-1.9943	4.46279e-05	0.00951251	1.33713	0.087618	0.225011	1	3.33143	IND
MEST	202016_at	4232	0.324718	0.587341	0.739723	-3.00644	0.00259745	0.0173318	4	3.33116	repr
DNAJB4	203810_at	11080	2.20969	0.00098855	0.0225031	-1.11873	0.00319147	0.0203613	4	3.32841	repr
DHRS7	210788_s_at	51635	1.31682	0.0192995	0.0951548	-2.01153	0.00670643	0.0348397	4	3.32835	repr
RIPK4	221215_s_at	54101	-1.72227	0.0604718	0.187465	1.603	0.0244444	0.0899278	1	3.32527	IND
CAMK1G	215161_at	57172	-1.24213	0.0242071	0.109038	2.08164	0.00124343	0.00996158	1	3.32376	IND
TNFAIP8	208296_x_at	25816	0.220729	0.510581	0.680895	-3.10281	6.87538e-05	0.00101387	4	3.32354	repr
MCM4	212142_at	4173	-3.30994	6.04974e-05	0.00991172	0.0124521	0.977023	0.990394	5	3.32239	IND	MCM4
NEB	205054_at	4703	0.765164	0.0951438	0.244487	2.55649	0.0457275	0.141632	2	3.32165	IND
NDST4	208334_at	64579	-1.75388	0.00780935	0.0587132	1.56445	0.0013916	0.0107448	1	3.31832	IND
GGH	203560_at	8836	-0.866489	0.00893126	0.0632643	2.44886	4.16311e-05	0.000674731	1	3.31535	IND
HSD17B8	213540_at	7923	-1.83582	0.0125334	0.075609	1.46987	0.0111333	0.0506234	1	3.3057	IND
AURKB	209464_at	9212	-2.5272	0.00343051	0.0394633	0.778276	0.218477	0.416069	1	3.30548	IND	AURKB
COG7	213190_at	91949	-1.45804	0.00320192	0.0382558	1.84612	6.65343e-06	0.000147171	1	3.30417	IND
ICAM2	213620_s_at	3384	-0.595532	0.218224	0.399009	2.70824	0.0100115	0.0468223	1	3.30377	IND
MYH11	201497_x_at	4629	0.0915965	0.728283	0.8392	-3.21195	0.00986603	0.0463269	5	3.30354	repr
OSBPL1A	209485_s_at	114876	0.801894	0.0307575	0.125347	-2.49639	0.00218374	0.0151483	4	3.29828	repr
EML1	204797_s_at	2009	0.219267	0.741746	0.847929	-3.07785	1.17243e-14	5.49791e-12	4	3.29712	repr
ST5	202440_s_at	6764	1.71882	0.00458718	0.0442003	-1.57772	0.00413492	0.0245858	4	3.29654	repr
CTPS	202613_at	1503	-1.95279	7.44982e-05	0.00991172	1.33939	0.0238975	0.0884558	1	3.29218	IND	CTPS
DHFR	202534_x_at	1719	-2.12889	6.29993e-05	0.00991172	1.16129	0.0291568	0.102598	1	3.29018	IND
CLIP3	212358_at	25999	1.66268	0.000280014	0.0137606	1.62331	0.165117	0.346331	2	3.28599	IND
LSM4	202736_s_at	25804	-1.12364	0.0010529	0.0231752	2.16221	0.00422217	0.0248942	1	3.28585	IND	LSM4
HOXD11	214604_at	3237	-0.678144	0.0575292	0.181307	2.60623	7.23348e-09	4.84574e-07	1	3.28437	IND
ZEB1	212764_at	6935	1.08942	0.0276155	0.11794	-2.19466	0.00276853	0.0181659	4	3.28407	repr
HRSP12	203790_s_at	10247	-1.41333	0.00213535	0.0318422	1.87013	0.0134098	0.0580319	1	3.28346	IND	HRSP12
ZDHHC4	220261_s_at	55146	-1.1202	0.0052725	0.0474255	2.16048	0.000422161	0.00425427	1	3.28068	IND
RREB1	203704_s_at	6239	-0.481421	0.0701614	0.204439	2.79049	0.000246021	0.00276439	1	3.27191	IND
GUSBP1	214850_at	153561	-0.467675	0.096524	0.245996	2.80385	4.89269e-10	4.4122e-08	1	3.27153	IND
TOB1	202704_at	10140	0.68451	0.016042	0.0865111	-2.58259	0.00117577	0.0095281	4	3.2671	repr
WDR82	215509_s_at	80335	-3.17426	0.000636821	0.0182089	0.0867131	0.795996	0.901471	5	3.26097	IND
MTMR9	204837_at	66036	2.02482	0.00282943	0.036585	-1.23496	0.0333588	0.11341	4	3.25977	repr			MTMR9
CARHSP1	218384_at	23589	-1.36634	0.00130124	0.0259803	1.8889	6.93305e-05	0.00101658	1	3.25525	IND
JARID2	203298_s_at	3720	-0.480947	0.274043	0.461815	2.76144	3.77063e-06	9.05209e-05	1	3.24239	IND
SSH1	221752_at	54434	-0.762002	0.0804638	0.22126	2.47521	1.03124e-06	3.08669e-05	1	3.23721	IND	SSH1
ARID1A	210649_s_at	8289	0.0800472	0.835582	0.910109	3.15632	3.24148e-07	1.17756e-05	5	3.23637	IND
FAM129A	217966_s_at	116496	0.27915	0.597478	0.744228	-2.95099	6.64655e-07	2.11547e-05	4	3.23014	repr
TM4SF1	209386_at	4071	1.38978	0.0082941	0.0607716	-1.84033	0.0514435	0.154177	4	3.23011	repr
FCGBP	203240_at	8857	-0.336065	0.356676	0.546117	2.89373	0.000117436	0.00154348	1	3.22979	IND
S100A11	200660_at	6282	0.967365	0.128913	0.29054	-2.26152	0.0609422	0.174681	4	3.22889	repr
RNF219	219303_at	79596	-1.68254	0.00256698	0.0353566	1.54174	0.00177446	0.0129165	1	3.22428	IND
TXNIP	201009_s_at	10628	1.40004	0.00136051	0.0264359	-1.81923	0.0722738	0.19674	4	3.21927	repr
HLA-DRB4	208306_x_at	3126	0.697327	0.179364	0.354097	2.5211	0.00581876	0.0314598	2	3.21843	IND
DDAH1	209094_at	23576	2.25447	0.000278082	0.0137606	-0.961937	0.439922	0.640218	4	3.2164	repr
OSTM1	218196_at	28962	1.06275	0.00289729	0.0368502	-2.1518	2.68033e-06	6.80629e-05	4	3.21455	repr
TRIO	209012_at	7204	1.12517	0.00860576	0.0617497	-2.08872	6.35162e-09	4.29589e-07	4	3.2139	repr		TRIO
ADAM9	202381_at	8754	0.998288	0.00307319	0.037727	-2.21516	0.000715375	0.00641012	4	3.21345	repr
C1QA	218232_at	712	-0.162557	0.637365	0.774974	3.05074	0.000520475	0.00502566	1	3.2133	IND
HNRNPU	216855_s_at	3192	-3.06692	0.000983138	0.0224526	-0.143211	0.404945	0.610324	3	3.21013	repr
LHFP	218656_s_at	10186	-2.23482	0.00110412	0.0239703	-0.974343	0.213551	0.410191	3	3.20917	repr
BMPR2	209920_at	659	1.25878	0.00548665	0.048658	-1.95008	5.18624e-06	0.000117677	4	3.20886	repr
RRAS	212647_at	6237	-0.530973	0.0982776	0.249471	-2.67685	0.000281279	0.00309143	3	3.20782	repr
PER3	221045_s_at	8863	-0.150089	0.638244	0.775909	-3.05659	4.513e-12	8.81791e-10	3	3.20668	repr
SLC25A11	209003_at	8402	-1.72104	0.000928011	0.0215433	1.48522	0.0227586	0.0851023	1	3.20626	IND
ISYNA1	222240_s_at	51477	-1.57011	0.0173969	0.0906972	1.63069	0.0203042	0.0787947	1	3.20079	IND
TPBG	203476_at	7162	0.169904	0.525064	0.692068	-3.0293	0.000708741	0.00637505	4	3.19921	repr
CDT1	209832_s_at	81620	-2.4859	0.0133392	0.0783859	0.712125	0.266104	0.470887	1	3.19803	IND	CDT1
UNG	202330_s_at	7374	-1.51434	0.00104209	0.0231231	1.68241	7.58929e-05	0.00108689	1	3.19675	IND
CDC42EP4	218062_x_at	23580	0.204412	0.557581	0.716245	-2.98881	3.13455e-07	1.14835e-05	4	3.19322	repr
MAP2K3	215498_s_at	5606	0.881425	0.0415265	0.149489	-2.31116	0.0147859	0.0619809	4	3.19259	repr
DGCR6	208579_x_at	8214	2.20532	0.00163334	0.0283182	0.987255	0.145221	0.317625	2	3.19257	IND
REV3L	208070_s_at	5980	0.0995637	0.669563	0.799067	-3.09189	1.71047e-08	9.96363e-07	5	3.19145	repr
WIPI1	203827_at	55062	1.09663	0.00808377	0.0600435	-2.0947	9.19994e-06	0.000189772	4	3.19133	repr
SMC4	201663_s_at	10051	-1.38655	0.0170832	0.0901529	1.80415	0.0410718	0.131828	1	3.1907	IND	SMC4
COX7C	213846_at	1350	-0.757643	0.0192207	0.0951548	2.4325	5.32114e-05	0.000823	1	3.19014	IND
INTS3	202809_s_at	65123	-0.269616	0.293235	0.483841	2.9193	8.26196e-11	1.03776e-08	1	3.18892	IND
ECT2	219787_s_at	1894	-1.62899	0.00597623	0.051208	1.55752	0.00062015	0.0057548	1	3.18651	IND	ECT2
ANXA2P2	208816_x_at	304	1.35134	0.00362676	0.0405574	-1.83392	0.000117281	0.00154348	4	3.18526	repr
MRS2	218536_at	57380	-1.49497	0.000671024	0.0185097	1.68747	1.16967e-05	0.00023507	1	3.18244	IND
ANXA2	213503_x_at	302	1.24927	0.00105618	0.0231752	-1.93173	0.0473837	0.144913	4	3.181	repr
TMSL8	205347_s_at	11013	-1.50422	0.0268937	0.116198	1.67671	0.0138112	0.0592006	1	3.18093	IND
PLOD2	202620_s_at	5352	1.29667	0.00141518	0.0268867	-1.88108	0.0433956	0.136758	4	3.17775	repr
CTNNAL1	202468_s_at	8727	-0.728494	0.0331754	0.131025	-2.44745	0.00637558	0.0334839	3	3.17595	repr
SPAG5	203145_at	10615	-2.08587	0.00284585	0.0366995	1.08727	0.0320998	0.110195	1	3.17314	IND	SPAG5
TSPYL5	213122_at	85453	-0.162859	0.727133	0.838331	3.00958	8.66747e-06	0.000179844	1	3.17244	IND
MCM6	201930_at	4175	-1.66066	0.000235795	0.0127298	1.51044	0.0406712	0.13099	1	3.1711	IND
WDR12	218512_at	55759	-1.24172	0.0120899	0.073692	1.92687	0.000701879	0.00633358	1	3.16859	IND	WDR12
AHCY	200903_s_at	191	-1.06752	0.00128224	0.0257338	2.09894	0.0178058	0.0714565	1	3.16646	IND	AHCY
S100A13	202598_at	6284	0.37906	0.297459	0.488177	-2.77923	0.000737016	0.00653742	4	3.15829	repr
TAF9B	221618_s_at	51616	-2.09292	0.000353498	0.0153488	1.06229	0.00569683	0.0311114	1	3.15521	IND
NUP85	218014_at	79902	-1.45537	0.00163215	0.0283182	1.69594	0.00578283	0.0312896	1	3.1513	IND	NUP85
PLAU	211668_s_at	5328	0.834176	0.0171893	0.0902986	-2.31521	2.60118e-06	6.62925e-05	4	3.14939	repr		PLAU
FEM1C	213341_at	56929	0.145394	0.496624	0.670728	-3.00183	2.7213e-23	6.38055e-20	4	3.14723	repr
EGFL7	218825_at	51162	-1.4204	0.000410214	0.0162104	1.72413	0.0026971	0.0178807	1	3.14453	IND
MLL	212080_at	4297	0.583133	0.0995685	0.251069	2.56052	4.72409e-05	0.000750096	2	3.14366	IND
CPVL	208146_s_at	54504	-0.711667	0.0504285	0.167082	2.42975	0.00479965	0.0274701	1	3.14142	IND	CPVL
DSTN	201022_s_at	11034	1.31021	0.00446789	0.0436332	-1.82726	0.00634435	0.0334028	4	3.13747	repr
PGAP1	213469_at	80055	-0.806637	0.0284578	0.11972	2.33074	7.86083e-06	0.000168075	1	3.13738	IND
MDK	209035_at	4192	1.28572	0.00334469	0.0390807	1.85101	0.00634913	0.033403	2	3.13672	IND		MDK
PDGFC	218718_at	56034	1.11646	0.0437994	0.153976	-2.01652	0.0182876	0.0727985	4	3.13298	repr
TH1L	220607_x_at	51497	-0.642783	0.0207352	0.0990165	2.48923	0.00109143	0.00897911	1	3.13201	IND	TH1L
TSPYL2	218012_at	64061	1.19447	0.00278171	0.0364365	1.93716	0.0147413	0.0619416	2	3.13163	IND
ITGAV	202351_at	3685	1.5328	0.00324285	0.0385307	-1.59698	0.0208244	0.0798738	4	3.12977	repr
RPL37A	214041_x_at	6168	-0.117732	0.77901	0.871669	3.01039	1.58362e-06	4.35124e-05	1	3.12812	IND
GATA2	209710_at	2624	-0.0769319	0.854397	0.92006	3.04956	3.48224e-05	0.000583193	5	3.12649	IND	GATA2		GATA2
COL4A1	211980_at	1282	1.82114	0.0173426	0.0905626	-1.30507	0.236325	0.43791	4	3.12621	repr
ZNF232	219123_at	7775	-0.93257	0.0751691	0.21243	2.1929	5.69991e-08	2.76504e-06	1	3.12547	IND	ZNF232
NMI	203964_at	9111	-1.28647	0.0153428	0.0846443	1.83842	0.0486772	0.148031	1	3.12489	IND	NMI
RHOQ	212117_at	23433	1.54601	9.50799e-05	0.00991172	-1.57386	0.00531225	0.0296324	4	3.11987	repr
CDC7	204510_at	8317	-1.41074	0.00298551	0.0371688	1.70683	0.00316319	0.0202088	1	3.11756	IND	CDC7
TUBB4	212664_at	10382	-1.81603	0.0144222	0.0814977	1.29728	0.377849	0.58645	1	3.11331	IND
RFC3	204127_at	5983	-1.92699	0.00114851	0.0246299	1.18618	0.0491204	0.149121	1	3.11317	IND	RFC3
TMEM9B	218065_s_at	56674	1.44174	0.00205398	0.03134	-1.67014	0.000340613	0.00360282	4	3.11188	repr
APBB2	213419_at	323	-0.825608	0.066	0.197719	-2.28283	4.64831e-10	4.32462e-08	3	3.10844	repr		APBB2
CREB3L2	212345_s_at	64764	1.34783	0.00130697	0.0259803	-1.76007	0.0241833	0.0892942	4	3.10789	repr		CREB3L2
MRPL23	213897_s_at	6150	-1.23397	0.00292984	0.0369328	1.87173	0.00258138	0.0172763	1	3.1057	IND
DPYSL3	201431_s_at	1809	-0.490365	0.281949	0.469826	-2.61479	0.00698189	0.0358996	3	3.10515	repr
RBM10	215089_s_at	8241	-0.464148	0.0902738	0.236535	2.63801	3.0116e-05	0.000514165	1	3.10216	IND
CLEC2B	209732_at	9976	1.90216	0.00010639	0.0102513	-1.19411	0.156211	0.33418	4	3.09627	repr
SSRP1	200956_s_at	6749	-1.10046	0.000915603	0.0214678	1.99471	0.00207808	0.0146318	1	3.09517	IND	SSRP1
CDCA3	221436_s_at	83461	-2.39849	0.0114927	0.0713501	0.694672	0.169836	0.353649	1	3.09316	IND	CDCA3
LSM8	219119_at	51691	-1.00688	0.0136297	0.0792979	2.08258	0.000613589	0.00572412	1	3.08947	IND
WDR6	217734_s_at	11180	-0.00927933	0.972888	0.983939	3.07656	4.94863e-05	0.000782217	5	3.08584	IND
RCN1	201063_at	5954	1.29763	0.00123005	0.0253071	-1.78772	0.00801423	0.0398953	4	3.08535	repr
ENDOG	204824_at	2021	-2.38287	0.0044085	0.0435052	0.701995	0.178794	0.365805	1	3.08486	IND
ASRGL1	218857_s_at	80150	-2.15163	0.00581531	0.05019	0.932874	0.295372	0.502696	1	3.0845	IND	ASRGL1
XAGE1D	220057_at	9503	-1.94764	0.000227253	0.0126629	1.13627	0.0275208	0.0977168	1	3.08391	IND
DDEF2	206414_s_at	8853	0.0883558	0.871111	0.92952	-2.99505	8.39076e-06	0.000176708	5	3.0834	repr
FAM64A	221591_s_at	54478	-1.9387	0.0228854	0.105068	1.14418	0.0236429	0.0877132	1	3.08288	IND
TIMELESS	203046_s_at	8914	-1.68732	0.00286789	0.0366995	1.39529	0.00128173	0.0101987	1	3.08261	IND	TIMELESS
GEMIN6	219539_at	79833	-1.853	0.000128127	0.0108146	1.22777	0.0118839	0.0532667	1	3.08077	IND
PAICS	201014_s_at	10606	-1.18975	0.00395227	0.0419118	1.88747	0.0140262	0.0599395	1	3.07721	IND	PAICS
PIP4K2A	212829_at	5305	0.842696	0.00834246	0.0609355	-2.23425	0.0279065	0.0989385	4	3.07695	repr
OAT	201599_at	4942	0.220978	0.561773	0.719635	-2.85074	1.86453e-05	0.000347882	4	3.07171	repr		OAT
KLF6	208961_s_at	1316	0.883067	0.0699936	0.204288	-2.18619	0.0265012	0.0951553	4	3.06925	repr
MAD2L1	203362_s_at	4085	-1.47722	0.00896112	0.0633016	1.59159	0.0154134	0.0642288	1	3.06881	IND
TJP1	202011_at	7082	1.36098	0.0221827	0.103196	-1.70716	0.132254	0.299221	4	3.06814	repr			TJP1
TUBG1	201714_at	7283	-1.46442	0.0010661	0.0232167	1.60025	0.0559702	0.164519	1	3.06467	IND
SCLY	221575_at	51540	-2.00066	8.72101e-05	0.00991172	1.06273	0.0025909	0.0173071	1	3.06339	IND			SCLY
GYG1	201554_x_at	2992	0.625287	0.150848	0.319117	-2.43394	0.00135583	0.0106096	4	3.05923	repr
SQRDL	217995_at	58472	0.0340227	0.891965	0.941912	-3.02391	0.000457474	0.00452584	5	3.05793	repr
CD83	204440_at	9308	-2.03767	2.24228e-05	0.00762237	-1.01693	0.107719	0.259661	3	3.0546	repr	CD83
TACC1	200911_s_at	6867	-0.541922	0.118886	0.276306	-2.51145	0.000274231	0.00303292	3	3.05337	repr
NOL5A	200875_s_at	10528	-1.18318	0.000477955	0.0170891	1.86967	0.00258132	0.0172763	1	3.05285	IND	NOL5A
THTPA	218540_at	79178	-1.17421	0.0117324	0.0724545	1.8768	7.06906e-05	0.00103161	1	3.05101	IND
IGFBP2	202718_at	3485	1.17825	0.04222	0.150596	1.87149	0.0591639	0.171188	2	3.04975	IND
HSPB8	221667_s_at	26353	-0.198185	0.529348	0.695189	-2.84691	0.0198434	0.0775436	3	3.04509	repr
CHAC1	219270_at	79094	1.62474	0.108778	0.263661	-1.42018	0.00215205	0.0149783	4	3.04492	repr
BMP1	205574_x_at	649	2.43557	0.000500128	0.0170891	-0.609307	0.246635	0.449038	4	3.04488	repr		BMP1
STXBP2	209367_at	6813	-1.47876	0.000735288	0.0194437	1.56482	0.0220577	0.0833263	1	3.04358	IND
KIAA0391	202713_s_at	9692	-1.43528	0.00370734	0.0408737	1.60493	0.00826622	0.0407746	1	3.0402	IND
SMA4	215599_at	11039	-0.382878	0.110441	0.265973	2.65717	5.35493e-09	3.65695e-07	1	3.04004	IND
LAMP2	203041_s_at	3920	1.41935	0.00279225	0.0364365	-1.61611	0.0149201	0.062469	4	3.03545	repr
BGLAP	206956_at	632	-1.299	0.00442305	0.0435052	1.73568	2.9953e-05	0.000514118	1	3.03469	IND	BGLAP
KIAA1598	221802_s_at	57698	-0.0848883	0.847784	0.917292	2.94803	0.000822881	0.00713284	5	3.03292	IND
FJX1	219522_at	24147	1.97251	0.0149164	0.0830661	-1.06037	0.00995566	0.0466581	4	3.03288	repr
DDX12	213378_s_at	440081	-1.74206	0.00012363	0.0108146	1.29013	0.0261962	0.0945916	1	3.03219	IND
C22orf9	217118_s_at	23313	0.476945	0.108765	0.263661	-2.55103	0.00110806	0.00908402	4	3.02797	repr
ZNF292	212368_at	23036	0.707585	0.00936344	0.0647956	2.32034	6.55687e-05	0.000984652	2	3.02793	IND
TCF7L1	221016_s_at	83439	1.29113	0.00886999	0.0629014	-1.734	0.000220029	0.00254553	4	3.02513	repr
GEMIN4	205527_s_at	50628	-1.75299	0.000208615	0.0120282	1.26585	0.0140954	0.0601254	1	3.01885	IND
MYL6B	204173_at	140465	-0.312068	0.187597	0.364217	2.70583	0.0017855	0.0129744	1	3.0179	IND
EXO1	204603_at	9156	-2.74085	2.60075e-05	0.00762237	0.275227	0.347606	0.557724	1	3.01608	IND	EXO1
TMED5	202195_s_at	50999	0.674563	0.123281	0.282462	-2.33973	2.00482e-12	4.27331e-10	4	3.0143	repr
PFN1	200634_at	5216	-0.258114	0.284331	0.472362	2.75191	0.00308776	0.0198713	1	3.01002	IND
PALM2-AKAP2	202760_s_at	445815	0.291902	0.645924	0.781284	-2.71721	0.00420208	0.0248382	4	3.00911	repr
DNMT1	201697_s_at	1786	-1.77404	0.00030285	0.0141076	1.23158	0.111759	0.265848	1	3.00563	IND	DNMT1
HMGB3	203744_at	3149	-0.95435	0.0356083	0.137093	2.04953	0.00111431	0.00911398	1	3.00388	IND	HMGB3
ASF1B	218115_at	55723	-2.65262	0.0114058	0.0711966	0.350198	0.629347	0.794905	1	3.00282	IND
TIAM1	213135_at	7074	0.439758	0.127349	0.288214	-2.5525	0.0203204	0.0787947	4	2.99226	repr
LAGE3	219061_s_at	8270	-0.578516	0.139057	0.303107	2.412	4.12422e-05	0.000669971	1	2.99052	IND
ALDH1L1	205208_at	10840	-0.859054	0.0838663	0.226289	2.12255	0.00166652	0.0123515	1	2.98161	IND
UBA1	200964_at	7317	-0.498033	0.101819	0.254422	2.47216	6.13224e-06	0.00013772	1	2.97019	IND
ICAM1	202637_s_at	3383	-0.0147525	0.960992	0.978148	-2.95282	8.81678e-06	0.000182404	5	2.96758	repr
CAPRIN2	218456_at	65981	2.32868	0.00140815	0.0268867	-0.637391	0.362568	0.571833	4	2.96607	repr
GPD1L	212510_at	23171	-0.521379	0.246427	0.430329	-2.44448	0.00381928	0.0231195	3	2.96586	repr
IGF2BP2	218847_at	10644	0.782384	0.104743	0.258967	2.18285	0.00741269	0.0376244	2	2.96524	IND
ATIC	208758_at	471	-1.07035	0.00394027	0.0419118	1.89361	0.0259455	0.0940115	1	2.96396	IND
SEC23A	204344_s_at	10484	1.44587	0.00131832	0.0261213	-1.51346	0.000678262	0.00618793	4	2.95933	repr		SEC23A
GPSM3	204265_s_at	63940	-0.765842	0.309362	0.500013	2.19206	0.0194944	0.0765625	1	2.9579	IND	GPSM3
CDC37L1	219343_at	55664	-0.865452	0.114908	0.271738	2.09124	8.33896e-05	0.00117242	1	2.95669	IND			CDC37L1
SLC25A15	218653_at	10166	-1.04648	0.0293822	0.122125	1.90856	0.00358827	0.0220729	1	2.95504	IND
TRIM22	213293_s_at	10346	1.62439	0.00559852	0.0493483	-1.33048	0.188986	0.379266	4	2.95487	repr
IFT122	220744_s_at	55764	-1.40551	0.015578	0.0853527	1.5488	0.0445075	0.13944	1	2.95432	IND
SH3GLB1	209090_s_at	51100	1.24655	0.00202726	0.031203	-1.70705	0.0144145	0.0610802	4	2.9536	repr		SH3GLB1
DNAJB9	202842_s_at	4189	2.06507	0.000130455	0.0108146	-0.885006	0.25992	0.463794	4	2.95007	repr
LOXL1	203570_at	4016	0.942215	0.0245082	0.109526	-2.00689	0.0289001	0.101951	4	2.9491	repr
GRINA	212090_at	2907	0.890831	0.0052397	0.047379	2.05697	0.000544655	0.00524091	2	2.94781	IND
CSGlcA-T	55093_at	54480	2.52978	3.70778e-05	0.00899329	-0.406919	0.306632	0.515413	4	2.9367	repr
RAD51AP1	204146_at	10635	-1.72485	0.000489573	0.0170891	1.21173	0.0100428	0.0468755	1	2.93658	IND	RAD51AP1
AES	217729_s_at	166	-0.554849	0.0388596	0.143821	2.38039	7.82992e-05	0.00111264	1	2.93523	IND
SMG1	211996_s_at	23049	0.69652	0.0716802	0.206558	2.23832	0.000225119	0.00257897	2	2.93484	IND
MCM5	201755_at	4174	-2.0899	0.00027987	0.0137606	0.843974	0.211845	0.408482	1	2.93387	IND	MCM5
THYN1	218491_s_at	29087	-1.7764	0.000591144	0.0178795	1.15535	0.0222543	0.0837543	1	2.93175	IND			THYN1
JAK1	201648_at	3716	-0.954189	0.0222278	0.103338	1.97586	0.0122141	0.0542729	1	2.93005	IND	JAK1
MSL-1	212708_at	339287	-1.85441	0.00858557	0.0617497	1.07439	0.0933035	0.234475	1	2.9288	IND
GOLT1B	218193_s_at	51026	1.3832	0.00322833	0.0384232	-1.54525	1.23217e-06	3.61128e-05	4	2.92845	repr		GOLT1B
ANKRD12	212286_at	23253	0.539473	0.142171	0.307041	-2.3873	8.7411e-05	0.00121512	4	2.92678	repr
COL1A1	202310_s_at	1277	2.81756	0.00411658	0.0420262	0.103935	0.945995	0.976456	2	2.9215	IND
HMBS	203040_s_at	3145	-1.62003	0.000811494	0.0206813	1.30138	0.0775654	0.2069	1	2.92141	IND
PPFIA3	215280_s_at	8541	-0.20618	0.559594	0.718019	2.71334	1.20608e-08	7.57459e-07	1	2.91952	IND	PPFIA3
EXT2	202013_s_at	2132	0.431438	0.242382	0.425591	-2.4865	1.69871e-09	1.32764e-07	4	2.91794	repr
CHAF1A	203976_s_at	10036	-2.42054	0.00291294	0.0368502	0.496372	0.220964	0.41939	1	2.91691	IND	CHAF1A
PKD2	203688_at	5311	0.777416	0.0733031	0.209471	-2.13805	2.07165e-10	2.24185e-08	4	2.91546	repr
MLLT3	204918_s_at	4300	-1.65468	0.00760384	0.0581589	1.25864	0.00446252	0.0260276	1	2.91332	IND
ADCY9	204497_at	115	0.391452	0.133809	0.297382	-2.52088	2.43444e-05	0.000437951	4	2.91233	repr		ADCY9
GRB10	209409_at	2887	0.632993	0.0617739	0.189994	-2.27384	0.00715731	0.0366408	4	2.90683	repr			GRB10
RRAGC	218088_s_at	64121	1.29047	0.000392683	0.016054	-1.61402	0.0128702	0.0564396	4	2.90449	repr
ITGB1BP1	203337_x_at	9270	-0.599068	0.137932	0.302247	-2.3044	1.01003e-06	3.03615e-05	3	2.90347	repr
FZD1	204452_s_at	8321	-2.05175	0.154877	0.324229	0.851321	0.14011	0.309819	1	2.90307	IND	FZD1
FOXD1	206307_s_at	2297	1.28252	0.0285336	0.119881	-1.62025	4.27636e-05	0.000688328	4	2.90277	repr
PIK3R3	202743_at	8503	0.732237	0.219649	0.400262	2.16938	0.000959881	0.00801877	2	2.90162	IND
IGF1	209541_at	3479	-0.403285	0.314325	0.50467	-2.49734	0.0033735	0.0212602	3	2.90063	repr			IGF1
ADCK2	221893_s_at	90956	-1.08535	0.011418	0.0711966	1.8139	1.54399e-06	4.27575e-05	1	2.89925	IND
TBCD	211052_s_at	6904	-1.42535	0.00122286	0.0253071	1.4726	0.000810013	0.0070492	1	2.89794	IND
STCH	202558_s_at	6782	1.28992	0.00863829	0.0617497	-1.60781	4.53466e-08	2.26218e-06	4	2.89773	repr		STCH
DNAL4	204008_at	10126	-0.357599	0.288477	0.477783	2.53924	1.10106e-06	3.25414e-05	1	2.89684	IND
DEAF1	209407_s_at	10522	-1.18266	0.00182986	0.0298637	1.71353	0.00240337	0.0163494	1	2.89619	IND
HYOU1	200825_s_at	10525	1.35133	0.00506573	0.0468847	1.54448	0.0203469	0.0788105	2	2.89582	IND
PRKAA1	209799_at	5562	0.0211297	0.944829	0.969501	-2.87442	7.61832e-09	5.00815e-07	5	2.89555	repr
ABCB6	203192_at	10058	-1.42706	0.046538	0.15883	1.46808	0.000351534	0.00368508	1	2.89514	IND	ABCB6
CDO1	204154_at	1036	0.356059	0.226569	0.40809	-2.53865	0.000184301	0.00218982	4	2.89471	repr
EGR1	201694_s_at	1958	-0.219278	0.81365	0.896072	-2.6754	0.0204049	0.0789051	3	2.89468	repr
PSRC1	201896_s_at	84722	-1.44194	0.0509733	0.168029	1.44994	0.0127897	0.0561914	1	2.89188	IND	PSRC1
ZNF91	206059_at	7644	0.664773	0.0414376	0.149402	2.219	0.00137622	0.0107083	2	2.88378	IND
LOC643246	208785_s_at	643246	1.54249	0.000537471	0.0173421	-1.34098	0.0114692	0.0517805	4	2.88348	repr
ANP32E	208103_s_at	81611	-2.10858	0.00455916	0.043998	-0.774459	0.135813	0.304141	3	2.88304	repr
LMNA	212086_x_at	4000	1.63613	0.00213193	0.0318422	-1.24109	0.0294578	0.103396	4	2.87721	repr
ANGEL2	221826_at	90806	-1.5454	0.000658094	0.0184424	-1.33133	4.77727e-06	0.000110537	3	2.87673	repr
SOCS5	209647_s_at	9655	0.914676	0.142877	0.308282	-1.96173	1.74747e-05	0.000333108	4	2.87641	repr
MT1G	204745_x_at	4495	0.988026	0.00209949	0.0315552	-1.88424	0.0164301	0.0671134	4	2.87226	repr
CHPT1	221675_s_at	56994	0.0561241	0.818599	0.899748	-2.81589	7.22603e-06	0.000157851	5	2.87202	repr
HMGB1	200679_x_at	3146	-1.28382	0.00368585	0.0408287	1.58279	0.00310171	0.0199428	1	2.86661	IND
GINS2	221521_s_at	51659	-1.78263	0.0031078	0.037845	1.0831	0.0757069	0.203408	1	2.86572	IND
CRMP1	202517_at	1400	0.615364	0.110026	0.265516	2.24903	0.00271487	0.0179053	2	2.86439	IND		CRMP1
SWAP70	209306_s_at	23075	0.503912	0.171232	0.344654	-2.36013	0.000135234	0.00173502	4	2.86404	repr
DNAJC16	212908_at	23341	1.15476	0.0186354	0.0933628	1.70922	0.000140798	0.0017836	2	2.86399	IND
TMEM48	218073_s_at	55706	-2.40013	9.87623e-05	0.00991172	0.462126	0.187598	0.377559	1	2.86226	IND	TMEM48
CLEC3B	212627_s_at	7123	-1.08038	0.00321827	0.0383683	1.77938	0.000238221	0.00270702	1	2.85976	IND
GALNT7	218313_s_at	51809	-0.313901	0.411345	0.5988	2.54496	0.000602239	0.0056482	1	2.85886	IND	GALNT7
NFKBIA	201502_s_at	4792	-0.491803	0.0438501	0.154037	-2.36662	0.00614356	0.0326882	3	2.85842	repr
NBL1	201621_at	4681	1.55613	0.00243772	0.0345704	-1.30114	0.0611765	0.175121	4	2.85728	repr
GSTM3	202554_s_at	2947	-0.594769	0.0202318	0.097406	2.25996	0.029755	0.104283	1	2.85472	IND
DCXR	217973_at	51181	-1.78883	0.00069085	0.0187938	1.06561	0.273505	0.478881	1	2.85444	IND
NCAPD3	212789_at	23310	-1.21365	0.00373885	0.0409333	1.63924	0.00575271	0.0311801	1	2.85289	IND
TRIP13	204033_at	9319	-1.80654	0.015208	0.0841647	1.04633	0.092018	0.232407	1	2.85287	IND
MBD3	41160_at	53615	-0.555404	0.0378774	0.141643	2.29615	2.54148e-06	6.50063e-05	1	2.85156	IND
SLIT2	209897_s_at	9353	0.0831058	0.916497	0.953767	-2.76542	0.000213394	0.00248102	5	2.84853	repr
DUSP14	203367_at	11072	0.265697	0.296222	0.486601	-2.58254	2.29676e-10	2.41126e-08	4	2.84823	repr
KIAA0913	212359_s_at	23053	1.15843	0.0201917	0.0973463	1.68863	0.00015551	0.00193262	2	2.84706	IND
STAM	203544_s_at	8027	1.04529	0.0027641	0.0364365	-1.7998	0.000413407	0.00419053	4	2.84509	repr
PDE9A	205593_s_at	5152	-1.0356	0.0136745	0.0794274	1.80646	0.000168576	0.00206219	1	2.84205	IND
EIF2AK3	218696_at	9451	1.17628	0.00297306	0.0371447	-1.66565	0.00017428	0.00211796	4	2.84193	repr
AKAP8L	218064_s_at	26993	0.993293	0.00211968	0.0317907	1.84833	0.000153496	0.00191435	2	2.84163	IND	AKAP8L
NRGN	204081_at	4900	-1.84499	0.0154543	0.0850594	0.994963	0.461141	0.656612	1	2.83995	IND
RFX5	202963_at	5993	-1.48029	0.00148197	0.0273601	1.35416	0.0786715	0.209057	1	2.83445	IND
ARHGAP4	204425_at	393	-0.93506	0.0195069	0.0955443	1.893	0.00313618	0.0200831	1	2.82806	IND
SERPINH1	207714_s_at	871	1.73925	0.00516258	0.0471985	-1.08612	0.331461	0.541069	4	2.82537	repr			SERPINH1
PARP1	208644_at	142	-0.811849	0.0183001	0.0928228	2.0118	5.03443e-05	0.000792218	1	2.82365	IND			PARP1
STK17A	202693_s_at	9263	0.716477	0.0480126	0.162132	-2.10669	0.00355772	0.0219903	4	2.82317	repr
PNKP	218961_s_at	11284	-0.900098	0.0709018	0.205829	1.92296	5.2711e-05	0.000819085	1	2.82306	IND
GABARAPL3	211458_s_at	23766	1.6391	0.00311128	0.037845	-1.18379	0.192257	0.383642	4	2.82289	repr
ANXA4	201302_at	307	0.15968	0.688491	0.812385	-2.66117	0.00208376	0.014643	4	2.82085	repr
C14orf169	219526_at	79697	-1.31787	0.000718431	0.0192262	1.50226	0.00028104	0.00309143	1	2.82014	IND
CSE1L	201112_s_at	1434	-1.38273	0.00186434	0.0299729	1.43648	0.0389871	0.127137	1	2.81921	IND	CSE1L
CRABP2	202575_at	1382	0.495948	0.282195	0.469924	-2.32265	7.32628e-10	6.2088e-08	4	2.8186	repr
C13orf18	219471_at	80183	-2.65353	0.00547249	0.0486118	-0.16454	0.829235	0.916533	3	2.81807	repr			C13orf18
NFKB1	209239_at	4790	0.201785	0.387168	0.573334	-2.61536	0.000326367	0.00348356	4	2.81715	repr		NFKB1
LARP1	210966_x_at	23367	-0.173736	0.520852	0.68879	2.64154	3.28041e-05	0.00055202	1	2.81528	IND
CPB2	206651_s_at	1361	-2.30593	0.0180028	0.0921626	0.507679	0.448251	0.646503	1	2.81361	IND
NRN1	218625_at	51299	-1.50774	0.0149271	0.0830661	1.30403	0.296789	0.504102	1	2.81177	IND
VGLL4	214004_s_at	9686	1.50804	0.000494862	0.0170891	1.30081	0.00468871	0.0269668	2	2.80885	IND
PAPPA	201982_s_at	5069	-1.28586	0.0594551	0.185376	1.52057	0.059538	0.1718	1	2.80642	IND
SIPA1L1	202254_at	26037	-1.0507	0.0425215	0.151402	1.75564	0.02004	0.078175	1	2.80634	IND
IL1RAP	205227_at	3556	-1.58162	0.00396878	0.0419118	1.22382	9.39845e-05	0.00128867	1	2.80544	IND	IL1RAP
MRPS27	212145_at	23107	-1.49996	0.000266363	0.0135768	1.30497	0.0369632	0.122452	1	2.80493	IND	MRPS27
GJA1	201667_at	2697	0.508325	0.375408	0.563272	-2.29614	0.0718626	0.196118	4	2.80446	repr
FEZ1	203562_at	9638	0.19269	0.475164	0.653944	-2.61114	0.0912407	0.231525	4	2.80383	repr
ACIN1	201715_s_at	22985	-0.482439	0.168518	0.340522	2.32058	2.30246e-09	1.72293e-07	1	2.80302	IND	ACIN1		ACIN1
PDE4DIP	205872_x_at	9659	-1.24094	0.167006	0.339319	1.56167	0.0828371	0.216287	1	2.80261	IND
PCYOX1	203803_at	51449	0.561817	0.118599	0.27605	-2.23869	1.62527e-10	1.8439e-08	4	2.80051	repr
RBMS3	206767_at	27303	0.981806	0.0176836	0.0912591	-1.81626	6.96269e-06	0.000152572	4	2.79807	repr
KDELC1	219479_at	79070	0.614454	0.236525	0.418861	-2.18233	5.13e-08	2.52612e-06	4	2.79679	repr
PBX3	204082_at	5090	0.742828	0.192318	0.369248	-2.05336	0.000288516	0.00313277	4	2.79619	repr
CREB3L1	213059_at	90993	1.13693	0.0035385	0.0399515	-1.65887	0.00223463	0.0154404	4	2.7958	repr
WDR68	221745_at	10238	-0.47015	0.329493	0.519887	2.32443	1.69377e-05	0.000326411	1	2.79458	IND
GLIPR1	214085_x_at	11010	1.82737	0.0277048	0.118116	-0.965624	0.33714	0.545912	4	2.79299	repr
ENO1	217294_s_at	2023	-0.430273	0.12794	0.288996	2.36215	0.088566	0.226765	1	2.79242	IND
C1orf103	220235_s_at	55791	1.3713	0.00312057	0.037845	1.41955	0.00230189	0.0158275	2	2.79085	IND
SERPINF1	202283_at	5176	-1.07392	0.124208	0.283846	-1.71654	0.190518	0.381563	3	2.79046	repr
SCRN1	201462_at	9805	0.528628	0.0992489	0.25076	-2.25662	0.0410896	0.131828	4	2.78525	repr
NUP98	210793_s_at	4928	-0.154452	0.764213	0.862145	-2.62938	1.28772e-06	3.72751e-05	3	2.78383	repr
POU3F2	207084_at	5454	-1.50409	0.0146756	0.0822884	1.27875	0.00709208	0.0363383	1	2.78284	IND
RP6-213H19.1	218499_at	51765	-0.57062	0.0517213	0.169845	-2.20436	0.00527136	0.0294978	3	2.77498	repr
KLF10	202393_s_at	7071	0.341999	0.484987	0.66215	-2.43223	0.000334107	0.00354023	4	2.77423	repr
CAPRIN1	200722_s_at	4076	-0.915877	0.0094862	0.0649717	1.85749	0.00839287	0.0411907	1	2.77337	IND
PRDX2	39729_at	7001	-0.722175	0.0259702	0.113594	2.05105	0.013706	0.058965	1	2.77322	IND
NUP205	212247_at	23165	-1.32354	0.00100224	0.0225983	1.44591	0.00143689	0.010974	1	2.76945	IND	NUP205
TPD52L1	203786_s_at	7164	2.20128	0.0558075	0.177464	-0.566492	0.57307	0.751749	4	2.76777	repr
BLOC1S1	202592_at	2647	-0.841465	0.0326831	0.129972	1.92631	1.95528e-07	7.99617e-06	1	2.76777	IND
GRAMD3	218706_s_at	65983	0.642723	0.189604	0.366287	-2.12464	0.000164815	0.00202676	4	2.76736	repr
ZMYM6	213698_at	9204	-0.09807	0.840661	0.913195	-2.66735	7.64804e-06	0.000165527	5	2.76542	repr
MANBA	203778_at	4126	1.1082	0.00958471	0.0654247	-1.65377	0.000204702	0.00240017	4	2.76197	repr		MANBA
B4GALT1	201883_s_at	2683	0.513798	0.144836	0.310602	-2.24769	0.0171534	0.069423	4	2.76149	repr
CCDC90A	220094_s_at	63933	-0.937061	0.00350508	0.0397657	1.82143	0.0070562	0.0362023	1	2.75849	IND
RRM1	201476_s_at	6240	-2.06325	0.00325864	0.038588	0.692494	0.298068	0.505695	1	2.75574	IND	RRM1
PKM2	201251_at	5315	0.28946	0.276264	0.463794	2.46374	0.00587521	0.0315995	2	2.7532	IND
SLC23A2	209236_at	9962	-1.10961	0.0192313	0.0951548	1.64245	0.0141943	0.0604376	1	2.75205	IND
CEP55	218542_at	55165	-1.82047	0.0418723	0.15027	0.929098	0.0769661	0.205983	1	2.74957	IND	CEP55
DDIT4	202887_s_at	54541	1.54958	0.0349656	0.135508	-1.19902	0.247338	0.449788	4	2.7486	repr
NAP1L3	204749_at	4675	1.40265	0.0160502	0.0865111	-1.34426	0.202565	0.397355	4	2.74691	repr
OGDHL	219277_s_at	55753	-0.730755	0.0684769	0.201903	2.01298	0.0226162	0.0846938	1	2.74373	IND
ADA	216705_s_at	100	-1.13425	0.00750738	0.0577756	-1.60759	0.0300955	0.105267	3	2.74184	repr
CTBP2	201218_at	1488	0.581245	0.263266	0.450453	-2.16049	0.00719342	0.0367989	4	2.74174	repr
ADAM19	209765_at	8728	1.54315	0.0318736	0.128085	-1.1978	0.0997854	0.246105	4	2.74094	repr		ADAM19
TM7SF2	210130_s_at	7108	-0.684145	0.336051	0.526074	2.05575	0.00424706	0.024999	1	2.73989	IND
SFRS2	200753_x_at	6427	-1.51987	0.00154036	0.0278125	1.21825	0.0343649	0.115823	1	2.73812	IND
DNAJB1	200666_s_at	3337	0.969081	0.0209142	0.0996011	-1.76358	0.0101157	0.0471215	4	2.73266	repr
PBX2	202875_s_at	5089	-1.27849	0.0458429	0.157682	1.45004	0.000959879	0.00801877	1	2.72853	IND	PBX2
GMPR2	217990_at	51292	-1.87558	0.00469068	0.0445267	0.85102	0.251851	0.454586	1	2.7266	IND			GMPR2
TK1	202338_at	7083	-2.58	0.00271153	0.0363109	0.146567	0.798743	0.902294	1	2.72657	IND
MAP1LC3B	208786_s_at	81631	1.73369	0.00015561	0.0114732	-0.992714	0.0443651	0.139128	4	2.7264	repr
UBE2S	202779_s_at	27338	-1.19955	0.00919914	0.0642524	1.52625	0.12359	0.284933	1	2.72581	IND
LBH	221011_s_at	81606	-2.32376	0.000599225	0.0178795	-0.399559	0.717641	0.853404	3	2.72332	repr
POLD1	203422_at	5424	-1.8437	4.14308e-05	0.00923861	0.879331	0.0319658	0.110147	1	2.72304	IND
ARG2	203946_s_at	384	-1.68505	9.4957e-05	0.00991172	1.03737	0.13693	0.305767	1	2.72242	IND
SCAP	212329_at	22937	-0.594672	0.0305671	0.124949	2.12744	0.00138995	0.0107448	1	2.72211	IND
GGA2	208914_at	23062	-1.46232	0.00721596	0.0566348	1.25908	0.036976	0.122452	1	2.7214	IND	GGA2
NEFH	33767_at	4744	-0.390782	0.272952	0.460528	2.33038	0.0317083	0.109492	1	2.72116	IND
BTG2	201236_s_at	7832	-0.799803	0.0895639	0.23516	-1.92066	0.0187414	0.0741149	3	2.72046	repr
CAMK2N1	218309_at	55450	1.81748	0.0147954	0.0825669	0.90191	0.543886	0.728981	2	2.71939	IND
SPTAN1	208611_s_at	6709	0.948967	0.0501791	0.166464	1.76968	0.0376235	0.124059	2	2.71865	IND
PGF	209652_s_at	5228	1.547	0.00525491	0.0474182	-1.17156	0.00871193	0.0422328	4	2.71856	repr		PGF
MRC2	37408_at	9902	0.758194	0.0138005	0.0794746	-1.95546	0.00165857	0.0123063	4	2.71366	repr
MACROD1	219188_s_at	28992	-1.58652	0.048339	0.162795	1.12669	0.0855501	0.221154	1	2.71321	IND
HOXC10	218959_at	3226	1.10505	0.024241	0.109038	1.60801	0.0174131	0.070312	2	2.71306	IND
C11orf51	204218_at	25906	-1.1383	0.0108825	0.0696522	1.57287	9.47205e-05	0.00129372	1	2.71117	IND
F2R	203989_x_at	2149	1.63937	0.00616016	0.05208	1.06833	0.0295701	0.103739	2	2.7077	IND			F2R
MYBL2	201710_at	4605	-2.00104	0.00185653	0.0299729	0.706494	0.154381	0.331133	1	2.70753	IND
SNTB2	205315_s_at	6645	-0.451063	0.181149	0.356121	-2.25539	0.00139363	0.0107487	3	2.70646	repr
CNOT7	218250_s_at	29883	-0.834093	0.00411296	0.0420262	1.87124	0.00643592	0.0337083	1	2.70533	IND
MRPL15	218027_at	29088	-0.475748	0.0528453	0.171218	2.22778	0.00136094	0.0106247	1	2.70353	IND
DTYMK	203270_at	1841	-2.50161	0.000179531	0.0114732	0.201017	0.629917	0.795305	1	2.70263	IND	DTYMK
FUBP1	214093_s_at	8880	-0.756103	0.0252831	0.111569	1.94589	0.00256878	0.0172248	1	2.70199	IND
HEBP2	203430_at	23593	0.0522727	0.828418	0.904978	-2.64947	0.0057185	0.0311331	5	2.70174	repr		HEBP2
NCAPD2	201774_s_at	9918	-2.17574	0.0693897	0.203285	0.525187	0.229454	0.429756	1	2.70092	IND
PCCB	212694_s_at	5096	-1.19109	0.000718864	0.0192262	1.5096	0.0108079	0.0495261	1	2.70068	IND
PBXIP1	212259_s_at	57326	2.17708	0.000846749	0.0208253	0.52199	0.37318	0.581687	2	2.69907	IND		PBXIP1
QTRT1	221270_s_at	81890	-1.19157	0.00123214	0.0253071	1.50635	0.00202936	0.0143751	1	2.69792	IND
ENDOD1	212573_at	23052	0.200765	0.477239	0.656414	-2.4969	0.00174107	0.0127703	4	2.69766	repr
TSC22D2	204094_s_at	9819	1.36215	0.0017266	0.0288478	-1.33532	0.0130177	0.0568381	4	2.69748	repr
ZNF692	220661_s_at	55657	-0.687449	0.0244297	0.109526	2.00795	9.00268e-05	0.00124655	1	2.6954	IND
LRP10	201412_at	26020	1.49669	0.0112058	0.0704626	-1.19649	0.109413	0.261861	4	2.69318	repr
SGCB	205120_s_at	6443	0.440131	0.247216	0.431494	-2.25282	0.000415525	0.00420548	4	2.69295	repr
COCH	205229_s_at	1690	-2.05595	6.76736e-05	0.00991172	-0.632416	0.262814	0.467654	3	2.68837	repr
COASY	201913_s_at	80347	-0.934663	0.00356953	0.04006	1.74633	4.25115e-05	0.000687415	1	2.68099	IND
SFRP1	202037_s_at	6422	0.597707	0.149563	0.317066	-2.08323	0.0198315	0.0775436	4	2.68094	repr		SFRP1
HOXB2	205453_at	3212	0.289917	0.363268	0.552137	-2.38721	1.19946e-05	0.000238333	4	2.67713	repr		HOXB2
EPB41L3	211776_s_at	23136	0.706356	0.0457166	0.157401	-1.97034	0.00531051	0.0296324	4	2.6767	repr			EPB41L3
PRMT1	206445_s_at	3276	-1.18318	0.00398393	0.0419118	1.49324	0.0591079	0.171097	1	2.67643	IND	PRMT1
ACVR1	203935_at	90	0.65621	0.0376625	0.141139	-2.01967	7.31956e-08	3.40965e-06	4	2.67588	repr
OAS3	218400_at	4940	-0.928244	0.0670424	0.199398	1.74741	5.27503e-05	0.000819085	1	2.67565	IND
LITAF	200706_s_at	9516	0.563865	0.241534	0.424843	-2.11124	0.0193165	0.0760574	4	2.67511	repr
MATN2	202350_s_at	4147	0.113236	0.692101	0.814342	-2.55931	0.00356799	0.0220309	4	2.67255	repr
CLIP1	201975_at	6249	1.14121	0.0119565	0.0730053	-1.53121	2.665e-05	0.000474572	4	2.67242	repr
WFS1	202908_at	7466	1.86293	0.000285272	0.0137606	-0.808883	0.314716	0.523984	4	2.67181	repr
KIAA1462	213316_at	57608	-1.45192	0.0449601	0.15574	1.21979	0.0132449	0.0575446	1	2.67171	IND
CD47	211075_s_at	961	0.352292	0.280442	0.468003	-2.31934	0.0081612	0.0404115	4	2.67163	repr
GAMT	205354_at	2593	-1.58737	0.000751376	0.0197208	1.08391	0.122757	0.2837	1	2.67128	IND
RSBN1	213694_at	54665	-0.757269	0.0851191	0.228261	1.91372	0.000368891	0.00382148	1	2.67099	IND	RSBN1
ACOT9	221641_s_at	23597	-0.0897161	0.838347	0.912555	-2.58062	1.11477e-10	1.35194e-08	5	2.67034	repr
CDC6	203967_at	990	-2.24541	0.0044077	0.0435052	-0.422672	0.353075	0.562903	3	2.66808	repr	CDC6
CDC42BPB	217849_s_at	9578	0.125201	0.69879	0.818942	2.54278	0.000552818	0.0052905	2	2.66798	IND
CREB3	209432_s_at	10488	1.85943	0.00628643	0.0525319	-0.807908	0.104281	0.253985	4	2.66734	repr
FASTKD1	219002_at	79675	-0.754473	0.0162158	0.0871366	1.90952	0.000287747	0.00313277	1	2.66399	IND
NDUFA3	218563_at	4696	-0.54464	0.117397	0.274651	2.11884	2.0091e-05	0.000371894	1	2.66348	IND
POLRMT	203782_s_at	5442	-0.611241	0.0446383	0.155081	2.05156	0.00589731	0.0316896	1	2.6628	IND
PTPRK	203038_at	5796	0.421474	0.333536	0.523756	-2.23969	0.0374489	0.123611	4	2.66117	repr
GOLIM4	204324_s_at	27333	0.773742	0.0248736	0.110327	-1.88591	8.59145e-08	3.94982e-06	4	2.65966	repr
DLX2	207147_at	1746	2.49574	0.00256855	0.0353566	0.162833	0.618198	0.78491	2	2.65858	IND
POLR3K	218866_s_at	51728	-0.9696	0.00505328	0.0468732	1.68894	0.00135533	0.0106096	1	2.65854	IND
SELENBP1	214433_s_at	8991	-0.817469	0.203619	0.382547	-1.84047	0.11003	0.262981	3	2.65794	repr
GRAMD1B	212906_at	57476	-0.550546	0.108619	0.263638	2.10428	0.00113998	0.00928079	1	2.65482	IND
CCNB1IP1	217988_at	57820	-0.631008	0.0280774	0.118974	2.02257	0.00217056	0.0150718	1	2.65358	IND
MRPS34	218112_at	65993	-1.20934	0.000523197	0.0171355	1.44419	0.000567482	0.00540877	1	2.65353	IND
DIMT1L	210802_s_at	27292	-1.57143	0.00146875	0.027219	-1.07511	0.00221156	0.0153111	3	2.64654	repr	DIMT1L
TGS1	219231_at	96764	-1.55186	0.00142957	0.0268867	1.09369	0.00833223	0.0409852	1	2.64555	IND
FOSL2	218880_at	2355	1.04521	0.00241211	0.0343458	-1.59955	0.0115378	0.0519569	4	2.64476	repr		FOSL2
RPL36	219762_s_at	25873	-0.400927	0.140188	0.304538	2.243	0.000159594	0.00197638	1	2.64393	IND
LMNB1	203276_at	4001	-1.63855	0.00023941	0.0127298	1.00476	0.0220075	0.0832263	1	2.64331	IND	LMNB1
NFYC	211251_x_at	4802	-1.1772	0.00678965	0.0549579	1.46571	0.000254077	0.00284582	1	2.64292	IND
BAMBI	203304_at	25805	1.69573	0.0062251	0.0524399	-0.94666	0.234039	0.435076	4	2.64239	repr	BAMBI
TSTA3	201644_at	7264	-1.0945	0.00118448	0.0250952	1.54783	2.53194e-07	9.78555e-06	1	2.64232	IND
GTF3C3	218343_s_at	9330	-0.369303	0.298567	0.489653	2.27297	0.000227916	0.00260253	1	2.64228	IND
MPDU1	209208_at	9526	-1.38154	0.0276946	0.118116	1.25836	0.0918109	0.23221	1	2.6399	IND
EIF4B	211937_at	1975	-0.718949	0.0587401	0.183798	1.92058	8.66076e-06	0.000179844	1	2.63953	IND
CUTC	218970_s_at	51076	-0.121295	0.645832	0.781284	-2.51808	0.000114307	0.0015142	3	2.63938	repr
HEBP1	218450_at	50865	-0.949716	0.00839926	0.0610966	-1.68586	0.0461693	0.142436	3	2.63557	repr
LPIN2	202459_s_at	9663	0.603652	0.373603	0.560923	2.02713	0.00121932	0.00979075	2	2.63078	IND
VPS37B	221704_s_at	79720	0.587173	0.0798685	0.219967	2.0428	0.00368555	0.0225624	2	2.62997	IND
RBM14	204178_s_at	10432	-1.52485	0.00201923	0.031203	1.10114	0.00630064	0.0332473	1	2.62599	IND
HOXA9	214651_s_at	3205	0.614364	0.105979	0.260431	-2.01102	0.00013876	0.00176498	4	2.62539	repr			HOXA9
PSEN1	203460_s_at	5663	1.41079	0.000652998	0.0184424	-1.21156	0.0921001	0.232531	4	2.62235	repr
KLF5	209212_s_at	688	0.891112	0.0631111	0.192926	-1.73008	0.00642269	0.0336641	4	2.62119	repr
RHBDF1	218686_s_at	64285	0.742276	0.0203915	0.0979071	-1.87809	4.07256e-05	0.00066337	4	2.62036	repr
LUM	201744_s_at	4060	0.398165	0.655041	0.787423	-2.22218	0.0243316	0.0896067	4	2.62035	repr
EXOSC5	218481_at	56915	-1.45213	0.0110372	0.0702275	1.1662	0.00153103	0.0115332	1	2.61833	IND
LHFPL2	212658_at	10184	0.111098	0.781033	0.873	-2.50653	4.62652e-06	0.000107758	4	2.61763	repr			LHFPL2
CD79A	205049_s_at	973	-0.98748	0.00738768	0.0573564	1.63009	0.109139	0.261764	1	2.61757	IND			CD79A
GFRA2	205722_s_at	2675	-1.80669	0.00681747	0.0549932	0.80994	0.0320443	0.110147	1	2.61663	IND
ECD	203013_at	11319	-1.11173	0.0425429	0.151402	1.5041	0.00138796	0.0107448	1	2.61583	IND
ENO2	201313_at	2026	-0.920296	0.0113969	0.0711966	1.69529	0.240325	0.442863	1	2.61559	IND
TMEM14A	218477_at	28978	-0.612361	0.122614	0.281761	-2.00033	0.0101002	0.0470808	3	2.61269	repr
GCDH	208369_s_at	2639	-1.4172	0.000845701	0.0208253	1.19524	0.0156903	0.0649593	1	2.61244	IND
MYO6	203216_s_at	4646	0.27593	0.369769	0.558474	-2.33198	2.28666e-05	0.000416693	4	2.60792	repr		MYO6
KIAA0182	212057_at	23199	1.00725	0.022362	0.103688	1.5998	0.0164217	0.0671134	2	2.60706	IND
PRNP	215707_s_at	5621	1.71919	0.0147064	0.0823139	-0.887158	0.392601	0.599296	4	2.60635	repr
TUBB6	209191_at	84617	-0.848356	0.0284247	0.119702	-1.7578	0.0678208	0.188558	3	2.60616	repr
SLC43A3	213113_s_at	29015	-0.896254	0.156876	0.326661	-1.70986	0.00516093	0.0290648	3	2.60612	repr
RSU1	201980_s_at	6251	0.319476	0.371372	0.559365	-2.28663	0.000109194	0.00146499	4	2.60611	repr
TTC3	210645_s_at	7267	0.336329	0.198509	0.376466	2.26772	0.00141838	0.0108677	2	2.60405	IND
NUP37	218622_at	79023	-1.22737	0.0187411	0.0937147	1.37588	0.0205339	0.0792731	1	2.60325	IND	NUP37
STXBP1	202260_s_at	6812	1.04417	0.00632203	0.052564	-1.55525	0.252692	0.455635	4	2.59942	repr
TPP1	200742_s_at	1200	1.18238	0.0144365	0.0814977	-1.41608	0.0820755	0.215017	4	2.59846	repr
TTC17	218972_at	55761	1.0965	0.0358317	0.137529	-1.50188	0.0260365	0.0942536	4	2.59838	repr
CADM1	209031_at	23705	-0.254771	0.449469	0.633073	2.34346	0.0129459	0.0566705	1	2.59823	IND
MSH2	209421_at	4436	-1.18797	0.000502725	0.0170891	1.41006	0.0137035	0.058965	1	2.59803	IND
ACBD3	202324_s_at	64746	1.57574	0.000222832	0.0125392	-1.0222	0.0381226	0.12513	4	2.59795	repr
RAB1A	207791_s_at	5861	0.858367	0.00508444	0.0469413	-1.73891	0.000484336	0.00474488	4	2.59728	repr
ZKSCAN1	214670_at	7586	0.507095	0.21144	0.391902	2.08879	7.53531e-06	0.000163591	2	2.59589	IND
MAF	209348_s_at	4094	0.883874	0.0432633	0.152768	-1.71119	0.00337571	0.0212602	4	2.59507	repr
MDFIC	211675_s_at	29969	-0.589032	0.0672865	0.199912	-2.00552	0.00153142	0.0115332	3	2.59455	repr
ATP5D	213041_s_at	513	-1.33831	0.00172237	0.0288455	1.25623	0.0265616	0.095275	1	2.59454	IND
APOLD1	221031_s_at	81575	1.11904	0.0556952	0.177347	-1.47547	0.0552039	0.162743	4	2.59451	repr
MEG3	210794_s_at	55384	1.21506	0.017806	0.0914882	1.37767	0.156404	0.334256	2	2.59273	IND
SATB2	213435_at	23314	0.748512	0.108302	0.263142	-1.84252	0.0180776	0.0722135	4	2.59103	repr
HMG20B	210719_s_at	10362	-1.52309	0.00974466	0.0657811	1.0673	0.134888	0.302649	1	2.59039	IND
FLRT2	204358_s_at	23768	-0.721895	0.163839	0.334644	1.86751	0.00168155	0.0124375	1	2.5894	IND	FLRT2
SPRED2	212458_at	200734	0.92589	0.12718	0.287976	-1.66337	0.00535037	0.0297894	4	2.58926	repr
OTUD3	213216_at	23252	0.284445	0.572627	0.727182	2.30425	2.87985e-05	0.000501555	2	2.5887	IND
RAP1B	200833_s_at	5908	0.837204	0.00727838	0.0568215	-1.75019	0.0628496	0.17862	4	2.58739	repr
CPE	201116_s_at	1363	-0.194159	0.45324	0.636218	-2.39319	0.073447	0.199118	3	2.58735	repr
EEF1A2	204540_at	1917	-0.394279	0.516644	0.685573	2.19306	0.0976312	0.241809	1	2.58734	IND
SLC17A7	204230_s_at	57030	-0.717177	0.171983	0.345736	1.86906	0.0811204	0.213149	1	2.58623	IND	SLC17A7
DCLRE1A	209804_at	9937	-1.85151	0.0135263	0.0789578	0.733888	0.0212744	0.0810639	1	2.5854	IND	DCLRE1A
SOX4	213668_s_at	6659	1.91118	0.0531666	0.171996	0.672076	0.142075	0.312885	2	2.58325	IND
RAB27A	210951_x_at	5873	0.396926	0.194719	0.371583	-2.18582	0.00363119	0.0222489	4	2.58274	repr
LAMB1	211651_s_at	3912	1.50814	0.00407853	0.0419421	1.07397	0.125395	0.287713	2	2.58212	IND
WHSC1	209052_s_at	7468	-2.34666	0.0101818	0.0671218	0.235282	0.654321	0.812587	1	2.58194	IND	WHSC1
CDCA4	218399_s_at	55038	-1.20065	0.00609657	0.051827	1.37989	0.00621046	0.0328949	1	2.58054	IND
FLJ10404	218920_at	54540	0.166772	0.506718	0.677342	2.41357	3.32195e-07	1.19217e-05	2	2.58034	IND
FGF2	204421_s_at	2247	0.385611	0.373506	0.560897	-2.19147	1.36904e-11	2.23949e-09	4	2.57708	repr
ZWILCH	218349_s_at	55055	-1.01012	0.0084187	0.0611116	1.56673	0.0102419	0.0475206	1	2.57684	IND
PA2G4	208676_s_at	5036	-1.21837	0.000430329	0.0163618	1.35763	0.00141987	0.0108677	1	2.576	IND	PA2G4
C16orf58	217891_at	64755	-0.670986	0.016912	0.0897129	1.90455	0.000146816	0.00184742	1	2.57553	IND
ID3	207826_s_at	3399	0.424823	0.0829434	0.224913	-2.14941	0.00135435	0.0106096	4	2.57423	repr
PARD3	221526_x_at	56288	0.301461	0.429541	0.614604	-2.27221	3.43032e-10	3.35123e-08	4	2.57367	repr
RIN2	209684_at	54453	1.53424	0.000297649	0.0140401	-1.03798	0.116608	0.274228	4	2.57222	repr
ARHGEF6	209539_at	9459	-1.68722	0.00972637	0.0657811	0.884129	0.246605	0.449038	1	2.57135	IND	ARHGEF6
ATP5H	210149_s_at	10476	-0.449341	0.07068	0.205542	2.1215	1.34392e-06	3.80896e-05	1	2.57084	IND
H1FX	204805_s_at	8971	-1.03008	0.00444852	0.0436332	1.54015	0.0852687	0.220507	1	2.57023	IND
CLIP2	211031_s_at	7461	0.606904	0.10793	0.262783	1.96218	0.00838963	0.0411907	2	2.56908	IND
DNMBP	212838_at	23268	1.16055	0.0170975	0.0901529	-1.40816	0.00369645	0.0225898	4	2.56871	repr
FUZ	221187_s_at	80199	-1.72027	0.000569056	0.0178694	0.848019	0.0101973	0.0473765	1	2.56829	IND
MED12	203506_s_at	9968	-0.583628	0.23483	0.417225	1.98373	0.000732474	0.00650533	1	2.56736	IND
DPH5	219590_x_at	51611	-0.723518	0.0658093	0.197316	1.84376	0.000124578	0.00162274	1	2.56728	IND
ITFG1	221449_s_at	81533	0.676875	0.159451	0.329586	-1.88398	0.054116	0.16012	4	2.56085	repr
WARS	200628_s_at	7453	2.03439	0.0154856	0.0851646	-0.526389	0.551882	0.735323	4	2.56078	repr
CHST6	221059_s_at	4166	1.74541	0.00328674	0.0387901	-0.813869	0.360394	0.569793	4	2.55927	repr
UBL3	201535_at	5412	0.615436	0.140328	0.304743	-1.94335	0.0017757	0.0129165	4	2.55879	repr
SLCO5A1	220984_s_at	81796	-0.985772	0.0534572	0.172565	1.57227	0.000468807	0.00461201	1	2.55804	IND
HMGA2	208025_s_at	8091	1.90218	0.000239664	0.0127298	0.654834	0.182214	0.370538	2	2.55701	IND
CLPP	202799_at	8192	-0.94043	0.00356307	0.04006	1.61475	0.0055899	0.0306943	1	2.55518	IND
DBI	209389_x_at	1622	-0.891504	0.0202936	0.0975717	1.65985	0.0223112	0.0838785	1	2.55135	IND
DBNDD2	218094_s_at	55861	-2.24382	0.000136327	0.0108968	0.305623	0.781814	0.893407	1	2.54944	IND
FLI1	210786_s_at	2313	-1.89234	0.000110289	0.0103436	0.654135	0.16406	0.344685	1	2.54647	IND	FLI1		FLI1
CUX2	213920_at	23316	-0.104786	0.819759	0.900267	2.43915	0.000714694	0.00641012	1	2.54393	IND
MAP2K6	205698_s_at	5608	-1.86164	0.00092323	0.0215433	0.680804	0.158747	0.337397	1	2.54245	IND
CTSC	201487_at	1075	-1.67985	0.00049662	0.0170891	-0.860457	0.383673	0.591282	3	2.54031	repr
WDR19	220917_s_at	57728	0.171967	0.427755	0.613171	2.36801	1.2992e-06	3.74531e-05	2	2.53998	IND
OBSL1	212776_s_at	23363	-0.402545	0.404401	0.591701	2.13582	0.00352888	0.0218505	1	2.53837	IND
IMPDH2	201892_s_at	3615	-1.30415	0.000836739	0.0208253	1.23164	0.115153	0.272173	1	2.53579	IND
CCDC90B	218288_s_at	60492	-1.15084	0.00132959	0.0262247	1.38427	0.0434616	0.136905	1	2.53511	IND
FAM127A	201828_x_at	8933	1.0082	0.0378055	0.141524	-1.52631	0.09892	0.244571	4	2.53451	repr
PAIP1	208051_s_at	10605	-0.407206	0.0988041	0.249906	2.12607	2.07529e-05	0.000383139	1	2.53328	IND
PPM2C	218273_s_at	54704	1.75685	0.00198919	0.0309557	-0.77632	0.130304	0.295886	4	2.53317	repr
ARHGAP17	218076_s_at	55114	-0.981671	0.0537579	0.173053	1.54784	0.0143988	0.0610802	1	2.52951	IND			ARHGAP17
DDX10	204977_at	1662	-0.582817	0.138695	0.302988	1.94634	0.00113287	0.00924589	1	2.52916	IND
MBNL1	201151_s_at	4154	-0.0287731	0.937423	0.965433	-2.49943	8.35061e-05	0.00117242	5	2.5282	repr
FEN1	204768_s_at	2237	-1.93853	0.00060058	0.0178795	0.587267	0.398262	0.604656	1	2.5258	IND	FEN1
TRO	210882_s_at	7216	0.612332	0.23375	0.415867	1.90908	6.05003e-06	0.000136397	2	2.52141	IND
GSTT1	203815_at	2952	-0.0810277	0.74692	0.85102	-2.43866	0.000169623	0.00206781	5	2.51968	repr
C14orf159	218298_s_at	80017	-0.542077	0.159307	0.329482	1.97668	0.0012692	0.0101105	1	2.51876	IND
UCHL1	201387_s_at	7345	0.179299	0.49277	0.667	2.33825	0.178193	0.364787	2	2.51755	IND		UCHL1
DGAT1	203669_s_at	8694	-1.3586	0.00505782	0.0468732	1.15367	0.0178966	0.0716882	1	2.51226	IND
AEBP1	201792_at	165	-0.209147	0.655178	0.787423	-2.29826	0.00596375	0.0319444	3	2.50741	repr
SLC25A32	221020_s_at	81034	0.225312	0.353872	0.54265	-2.2793	7.74658e-05	0.00110526	4	2.50461	repr
UBXD6	215983_s_at	7993	-0.844754	0.0334765	0.131844	1.65878	5.09191e-07	1.69746e-05	1	2.50354	IND			UBXD6
SEC24A	212900_at	10802	1.54823	0.0006096	0.0178795	-0.955107	0.0156451	0.0648813	4	2.50333	repr
FN1	214701_s_at	2335	2.33369	0.0163537	0.0875435	-0.169488	0.853776	0.927958	4	2.50318	repr
CHD8	212571_at	57680	0.235459	0.492433	0.666983	2.26267	4.37374e-07	1.50808e-05	2	2.49813	IND
NUP62	207740_s_at	23636	-1.69695	0.00563303	0.0494666	0.800013	0.141924	0.312847	1	2.49697	IND
PWP2	209336_at	5822	-1.95463	0.00329826	0.038796	0.542005	0.146905	0.320403	1	2.49663	IND
NR4A3	209959_at	8013	-0.26098	0.393846	0.580535	-2.23291	1.98921e-06	5.24049e-05	3	2.49389	repr			NR4A3
CDC25C	205167_s_at	995	-1.68088	0.00222357	0.0323865	0.812773	0.0404333	0.130462	1	2.49365	IND
DEPDC1	220295_x_at	55635	-2.00477	0.0492922	0.164557	0.488003	0.244203	0.446509	1	2.49277	IND	DEPDC1
PTPRG	204944_at	5793	1.38602	0.0254706	0.112115	-1.10638	0.0284386	0.100572	4	2.4924	repr			PTPRG
TP53BP2	203120_at	7159	0.379439	0.192331	0.369248	-2.11288	6.91399e-06	0.000151978	4	2.49232	repr
JUNB	201473_at	3726	-0.628338	0.168069	0.340008	-1.86305	0.0163323	0.0668302	3	2.49139	repr
ZNF22	218005_at	7570	-0.528947	0.370946	0.559076	1.96186	0.0263638	0.0949527	1	2.49081	IND
HN1	217755_at	51155	-0.224462	0.454465	0.637175	2.26528	0.00617392	0.0327972	1	2.48974	IND
RASL12	219167_at	51285	-0.194699	0.489685	0.665335	-2.29501	9.80927e-07	2.9613e-05	3	2.48971	repr
OAS1	205552_s_at	4938	-0.504544	0.144572	0.310281	1.98503	0.00135971	0.0106247	1	2.48957	IND
STOML2	215416_s_at	30968	-0.51249	0.108977	0.263871	1.97482	0.00760414	0.0383698	1	2.48731	IND
RNMT	202683_s_at	8731	0.772238	0.0377431	0.141366	1.7144	3.90001e-05	0.00064396	2	2.48664	IND
MEN1	202645_s_at	4221	-0.429653	0.290908	0.481013	2.0566	0.000920698	0.00774664	1	2.48625	IND	MEN1
FARSA	202159_at	2193	-1.24274	0.00066811	0.0185019	1.24268	0.027952	0.09905	1	2.48541	IND
MFHAS1	213457_at	9258	1.50716	0.0212366	0.100462	-0.976585	0.0722742	0.19674	4	2.48374	repr
C1orf54	219506_at	79630	-1.17962	0.0524452	0.170568	1.30377	0.00743824	0.0376678	1	2.48339	IND
GAB2	203853_s_at	9846	1.6777	0.00364586	0.0406418	-0.805492	0.160451	0.33984	4	2.48319	repr		GAB2	GAB2
OPTN	202074_s_at	10133	0.614848	0.0925444	0.240094	-1.8635	0.00486715	0.027766	4	2.47835	repr
NUP88	202900_s_at	4927	-1.44513	0.0010135	0.0226315	1.03112	0.0818033	0.214543	1	2.47625	IND	NUP88
MFSD1	218109_s_at	64747	1.37619	0.00164882	0.0284481	-1.09948	0.227969	0.428408	4	2.47568	repr
RNF111	218761_at	54778	1.35359	0.000179019	0.0114732	1.12116	0.0156324	0.0648813	2	2.47474	IND
FBXO46	205310_at	23403	-0.694179	0.00916847	0.0641682	1.77933	3.19822e-08	1.63017e-06	1	2.47351	IND
FYN	210105_s_at	2534	0.755034	0.159661	0.329923	-1.71806	0.0497144	0.150455	4	2.47309	repr		FYN
EFNB1	202711_at	1947	-1.39031	0.00414205	0.0420393	1.08039	0.000974437	0.00812108	1	2.4707	IND	EFNB1
DVL2	57532_at	1856	-0.828567	0.0185808	0.0932222	1.6387	2.95343e-05	0.000511686	1	2.46727	IND
CD9	201005_at	928	0.507491	0.423716	0.609742	-1.95848	0.0743594	0.200875	4	2.46597	repr
TNFAIP6	206025_s_at	7130	-2.34238	0.112351	0.268959	-0.121645	0.900226	0.952739	3	2.46402	repr
PRPS2	203401_at	5634	-1.26963	0.00691709	0.0554787	-1.19373	0.105477	0.256102	3	2.46335	repr
MTMR15	203678_at	22909	-0.698244	0.0620524	0.190601	1.76511	1.95754e-06	5.17644e-05	1	2.46335	IND
ADRA1D	210960_at	146	-1.43528	0.0144331	0.0814977	1.02806	0.00250717	0.0169409	1	2.46334	IND
PEBP1	205353_s_at	5037	-0.484302	0.0818674	0.223229	1.97829	0.0085881	0.0419312	1	2.46259	IND
GTSE1	204318_s_at	51512	-1.50466	0.0830815	0.225114	0.956228	0.0243047	0.0895542	1	2.46089	IND	GTSE1
ENC1	201341_at	8507	1.45147	0.0420043	0.150338	-1.00629	0.306506	0.51541	4	2.45776	repr
MPZL1	210594_x_at	9019	1.49481	0.0537189	0.173012	-0.962194	1.71467e-07	7.20301e-06	4	2.45701	repr
LRIG1	211596_s_at	26018	-1.2457	0.0578536	0.181914	1.21118	0.0450149	0.140166	1	2.45688	IND	LRIG1
PAN2	203117_s_at	9924	-0.550377	0.0649246	0.196024	1.90427	2.5798e-05	0.000461738	1	2.45465	IND
SKAP2	204362_at	8935	0.26969	0.230497	0.412129	-2.1847	0.00185104	0.0133541	4	2.45439	repr
DYRK2	202969_at	8445	0.658845	0.246153	0.430247	-1.79285	5.84152e-05	0.000889002	4	2.4517	repr			DYRK2
HDAC1	201209_at	3065	-0.642718	0.0330775	0.130712	1.80818	0.00454361	0.0263663	1	2.45089	IND
PDCD2	213581_at	5134	-1.11492	0.00620852	0.052363	1.33435	0.00163506	0.0121704	1	2.44928	IND
SNRPF	203832_at	6636	-0.570208	0.0234404	0.106718	1.87837	0.0101285	0.0471335	1	2.44858	IND
D4S234E	209569_x_at	27065	-0.522901	0.453109	0.636162	1.92554	0.0440453	0.138372	1	2.44844	IND
PMVK	203515_s_at	10654	-1.19948	0.0113683	0.0711429	1.24754	0.00344504	0.0214826	1	2.44702	IND
SAC3D1	205449_at	29901	-1.34134	0.000428567	0.0163618	1.10422	0.0478459	0.145944	1	2.44555	IND
KIAA0040	203143_s_at	9674	0.731832	0.0397028	0.145173	-1.71358	0.000287935	0.00313277	4	2.44541	repr
LEPRE1	220750_s_at	64175	2.08485	0.000821445	0.0207843	-0.360555	0.372922	0.581497	4	2.4454	repr
CPSF1	201639_s_at	29894	-0.311767	0.222952	0.403978	2.13353	1.73002e-05	0.000330793	1	2.4453	IND
UBXD7	217100_s_at	26043	0.473446	0.123733	0.283128	1.97145	1.34181e-05	0.000265121	2	2.44489	IND
BOLA1	219345_at	51027	-1.01067	0.0281208	0.11907	1.43403	7.50168e-07	2.32453e-05	1	2.44469	IND
N4BP1	32069_at	9683	0.442433	0.112736	0.268994	-2.00057	0.000117039	0.00154348	4	2.443	repr
TBC1D3	209403_at	84218	1.22345	0.00039958	0.0160614	1.2188	0.0392919	0.127835	2	2.44225	IND
KATNB1	203162_s_at	10300	-1.32301	0.000509405	0.0170891	1.11899	0.00379754	0.0230474	1	2.442	IND			KATNB1
AGPS	205401_at	8540	-0.252715	0.489238	0.665243	-2.18853	1.83267e-07	7.53858e-06	3	2.44125	repr
SPTBN1	212071_s_at	6711	0.982479	0.0490271	0.164133	-1.45778	0.131287	0.297799	4	2.44026	repr
GSTA4	202967_at	2941	-0.663673	0.0655347	0.196941	1.77655	0.0427737	0.135466	1	2.44023	IND
FBXO5	218875_s_at	26271	-2.19244	0.000490756	0.0170891	0.24193	0.623152	0.789348	1	2.43437	IND
LIMS1	212687_at	3987	0.702611	0.00936187	0.0647956	-1.73171	0.00421655	0.0248819	4	2.43433	repr
CST3	201360_at	1471	0.711286	0.118788	0.276306	-1.71993	0.168031	0.350676	4	2.43122	repr		CST3
ALDH2	201425_at	217	0.803457	0.0585236	0.183335	-1.62551	0.0579612	0.16875	4	2.42897	repr
KIAA0265	209256_s_at	23008	0.55588	0.327571	0.518393	1.8728	0.000140984	0.0017836	2	2.42868	IND
NDC80	204162_at	10403	-1.1222	0.0283097	0.119526	1.30632	0.00255259	0.0172147	1	2.42852	IND
ZBTB43	204181_s_at	23099	0.421991	0.215414	0.395619	-2.00565	3.64474e-07	1.28186e-05	4	2.42764	repr
CDC2L6	212899_at	23097	-0.213748	0.563831	0.720827	2.20912	0.0039306	0.0236508	1	2.42286	IND
SUPT16H	217815_at	11198	-0.779399	0.00636153	0.0526325	1.64335	0.00336679	0.0212585	1	2.42274	IND			SUPT16H
IGF2R	201392_s_at	3482	1.92768	0.000384497	0.0160033	0.494935	0.412543	0.617278	2	2.42261	IND
HNMT	204112_s_at	3176	0.314518	0.542995	0.705472	-2.10795	0.000794719	0.0069528	4	2.42247	repr
SMARCD3	204099_at	6604	0.532622	0.400212	0.58736	1.88978	0.0320512	0.110147	2	2.4224	IND
HOXD10	207373_at	3236	0.0991867	0.826039	0.903071	2.32201	9.51362e-06	0.000194531	5	2.4212	IND
FBXL7	213249_at	23194	0.266789	0.277599	0.465035	-2.15364	1.01682e-05	0.000206118	4	2.42043	repr
SLC1A1	213664_at	6505	-0.550721	0.129181	0.290872	1.8691	0.00429516	0.0251978	1	2.41982	IND
OGDH	201282_at	4967	-0.936301	0.00368493	0.0408287	1.48346	0.0539341	0.15987	1	2.41976	IND
CPD	201941_at	1362	1.41962	0.00365494	0.0406786	-0.999178	0.193219	0.384906	4	2.41879	repr
OSGEPL1	220631_at	64172	-1.25102	0.00392182	0.0419118	1.16675	0.00116096	0.00942981	1	2.41777	IND
CDC40	203376_at	51362	-1.02855	0.0293843	0.122125	1.38792	0.00519666	0.0291959	1	2.41647	IND
MRPS28	219819_s_at	28957	-1.015	0.00367189	0.0408027	1.40092	0.0133237	0.0577799	1	2.41592	IND
MN1	205330_at	4330	0.186607	0.79584	0.883895	2.22896	0.00349233	0.0217197	2	2.41557	IND
PRKCSH	200707_at	5589	-0.0573528	0.825781	0.90307	2.35613	0.00100122	0.00828538	5	2.41349	IND			PRKCSH
PRPS1	208447_s_at	5631	-1.34473	0.000362941	0.0155666	-1.06813	0.0934105	0.234589	3	2.41286	repr
VAT1	208626_s_at	10493	1.59547	0.000170543	0.0114732	-0.816536	0.179307	0.366748	4	2.41201	repr
SRPRB	218140_x_at	58477	1.09801	0.00158852	0.0280041	-1.31327	0.101245	0.248312	4	2.41129	repr
RIPK1	209941_at	8737	-0.0459301	0.873525	0.930966	-2.36372	3.3647e-12	6.76208e-10	5	2.40965	repr
FKBP1B	206857_s_at	2281	-0.686234	0.070317	0.204807	-1.72194	0.0258458	0.0937594	3	2.40817	repr
FARP1	201910_at	10160	0.821772	0.282624	0.470527	-1.58622	0.000123968	0.0016178	4	2.40799	repr		FARP1
RAP1GAP	203911_at	5909	-0.437692	0.415569	0.60233	1.96977	0.0249839	0.0915296	1	2.40747	IND	RAP1GAP
SLC27A3	222217_s_at	11000	-0.639267	0.0750004	0.212182	-1.76726	0.0117607	0.0528256	3	2.40653	repr
MRPS2	218001_at	51116	-0.505523	0.0808377	0.222049	1.89823	0.00501247	0.0284336	1	2.40376	IND
CSDA	201161_s_at	8531	-0.533026	0.31993	0.510987	-1.86907	0.124733	0.28671	3	2.40209	repr
GNPAT	201956_s_at	8443	-0.893437	0.00424692	0.042433	1.50808	0.00687413	0.0354491	1	2.40152	IND	GNPAT
MAOA	212741_at	4128	0.505202	0.363223	0.552137	-1.89594	0.0357974	0.119449	4	2.40114	repr
SLC38A1	218237_s_at	81539	1.69316	0.00262083	0.0357266	-0.707677	0.575295	0.753363	4	2.40084	repr
RBMX	213762_x_at	27316	-1.21073	0.00126964	0.0257338	1.18996	0.0605605	0.174005	1	2.40069	IND	RBMX
PABPN1	201545_s_at	8106	-0.231682	0.478091	0.656943	2.16875	0.000519331	0.00502472	1	2.40043	IND	PABPN1
LAS1L	208117_s_at	81887	-0.324114	0.278673	0.466378	2.0748	4.5963e-05	0.000731456	1	2.39891	IND
EHMT2	202326_at	10919	-0.868116	0.0435083	0.153532	1.52911	0.00183433	0.0132607	1	2.39722	IND
IPW	221974_at	3653	0.266493	0.310565	0.50138	2.13052	1.15743e-05	0.000233277	2	2.39702	IND
SIM2	206558_at	6493	-0.0445715	0.850887	0.919377	2.35191	0.00134705	0.0105867	5	2.39648	IND			SIM2
CHST1	205567_at	8534	-0.403584	0.0996081	0.251069	1.99221	0.0118834	0.0532667	1	2.39579	IND
MTA1	211783_s_at	9112	-0.503712	0.158297	0.328244	1.89064	0.00128553	0.0102175	1	2.39436	IND
PPM1J	200885_at	333926	1.21566	0.00524038	0.047379	-1.17278	0.119843	0.279082	4	2.38843	repr
PDE4A	204735_at	5141	-1.7229	0.00182748	0.0298637	0.665129	0.293143	0.500599	1	2.38803	IND
C3orf28	220942_x_at	26355	-1.24174	0.0031956	0.0382558	1.14263	0.0600239	0.172852	1	2.38437	IND
APEX1	210027_s_at	328	-0.769128	0.00911473	0.064049	1.61354	0.0049703	0.02824	1	2.38267	IND	APEX1
DHPS	202802_at	1725	-1.52399	0.000595761	0.0178795	0.858536	0.119142	0.278319	1	2.38252	IND
APEH	201284_s_at	327	-1.73751	0.0113113	0.0709125	0.644615	0.367832	0.577014	1	2.38212	IND
GALNT10	207357_s_at	55568	1.06075	0.0132649	0.0780799	-1.32047	6.36757e-05	0.00095909	4	2.38122	repr
ANXA5	200782_at	308	0.387397	0.158326	0.328244	-1.99372	0.00551436	0.0303743	4	2.38112	repr
MAGED1	209014_at	9500	0.036514	0.887455	0.93969	2.34351	0.00328808	0.0208928	5	2.38003	IND
C9orf16	41047_at	79095	0.0270507	0.951173	0.973248	2.35047	0.000748623	0.00661534	5	2.37752	IND
REXO2	218194_at	25996	0.971367	0.00487676	0.0457375	-1.40613	0.0894252	0.228401	4	2.3775	repr
SF3B3	200687_s_at	23450	-1.03934	0.00291805	0.0368502	1.33801	0.00091313	0.00771063	1	2.37735	IND
PEX6	204545_at	5190	-0.719746	0.0574289	0.181227	1.65644	0.00084474	0.00729068	1	2.37619	IND
RECQL4	213520_at	9401	-1.36033	0.0170338	0.0901529	1.01404	0.0112225	0.0508626	1	2.37437	IND
FDXR	207813_s_at	2232	-1.2967	0.0132479	0.0780451	1.07546	0.0618181	0.176258	1	2.37216	IND
RNF41	201962_s_at	10193	1.33111	0.0114143	0.0711966	1.04072	0.0916555	0.232075	2	2.37183	IND
FKBP4	200894_s_at	2288	-1.1929	0.000969961	0.0222964	1.17858	0.0472824	0.144728	1	2.37148	IND	FKBP4
MKKS	218138_at	8195	-1.19957	0.00160881	0.0281502	1.16681	0.00980303	0.0460926	1	2.36638	IND	MKKS
PCAF	203845_at	8850	-0.0354168	0.867987	0.928512	-2.32914	0.0007291	0.00648355	5	2.36456	repr
HMGB2	208808_s_at	3148	-1.15717	0.00746134	0.0576104	1.20676	0.251272	0.454144	1	2.36392	IND
CAPN6	202965_s_at	827	0.494932	0.139056	0.303107	-1.86894	0.00733039	0.0373637	4	2.36388	repr
FXYD5	218084_x_at	53827	1.18228	0.103807	0.257619	-1.17947	0.329272	0.539345	4	2.36175	repr
RC3H2	220202_s_at	54542	0.341963	0.193715	0.370949	2.01904	9.53333e-05	0.00129956	2	2.361	IND
IGF1R	203628_at	3480	1.32319	0.0057655	0.050036	1.03707	0.0868624	0.22356	2	2.36026	IND
C11orf67	221599_at	28971	1.15506	0.0159322	0.0861392	-1.20498	0.000882858	0.00753643	4	2.36004	repr
MSRA	219281_at	4482	-0.454823	0.274761	0.462693	1.90437	0.000617815	0.0057483	1	2.35919	IND
CAV2	203323_at	858	-2.18375	8.36454e-05	0.00991172	-0.173973	0.849035	0.926284	3	2.35772	repr	CAV2
ZFPM2	219778_at	23414	-0.00972659	0.982004	0.989743	-2.34693	0.000631804	0.00585522	5	2.35666	repr
SNRPA	201770_at	6626	-1.39394	0.000503657	0.0170891	0.96261	0.191157	0.382096	1	2.35656	IND
SLC20A1	201920_at	6574	-0.429712	0.319157	0.510333	-1.92676	0.0353488	0.118233	3	2.35648	repr	SLC20A1
CKB	200884_at	1152	-0.897633	0.144581	0.310281	1.45868	0.241715	0.444236	1	2.35632	IND
GNS	203676_at	2799	1.89092	0.048393	0.162869	-0.465291	0.290741	0.49836	4	2.35621	repr
TDRD3	208089_s_at	81550	-0.389696	0.212326	0.392613	1.9647	8.97888e-09	5.79426e-07	1	2.35439	IND
TWIST1	213943_at	7291	-0.686898	0.0845566	0.227356	-1.66596	0.0100738	0.0469887	3	2.35285	repr
BACE1	217904_s_at	23621	0.662556	0.115933	0.272671	-1.68867	0.010023	0.0468451	4	2.35123	repr
CENTG2	204066_s_at	116987	-0.678406	0.0232252	0.106013	1.67171	0.0117271	0.0527421	1	2.35012	IND
APITD1	213454_at	378708	-1.23822	0.000657776	0.0184424	1.11079	0.0337756	0.114385	1	2.34901	IND
PALB2	219530_at	79728	-0.797316	0.0110659	0.0702508	1.5505	5.74092e-10	4.92459e-08	1	2.34781	IND
C12orf44	218214_at	60673	0.801297	0.01496	0.0830661	-1.54629	0.00341229	0.0214113	4	2.34758	repr
OPLAH	222025_s_at	26873	-0.31058	0.439231	0.622983	2.03676	0.000178943	0.00216641	1	2.34734	IND
HOXA10	213150_at	3206	0.480936	0.153799	0.323028	-1.86566	0.000127383	0.00165012	4	2.34659	repr
TNS3	217853_at	64759	1.07685	0.0139029	0.079766	-1.2694	0.196563	0.390461	4	2.34625	repr			TNS3
SH3BP4	222258_s_at	23677	2.26614	9.71396e-05	0.00991172	-0.0795694	0.919796	0.962918	5	2.34571	repr
TNS1	221748_s_at	7145	-1.39913	0.0134957	0.0788447	-0.945541	0.413422	0.618068	3	2.34467	repr	TNS1
SLC39A4	219215_s_at	55630	-1.39751	0.000401243	0.0160614	0.946324	0.0174607	0.0704233	1	2.34383	IND	SLC39A4
ORC1L	205085_at	4998	-2.32114	6.70662e-05	0.00991172	0.0226629	0.926751	0.966315	5	2.3438	IND	ORC1L
SNAPC1	205443_at	6617	1.47617	0.00382721	0.0414801	-0.867055	0.0538452	0.159674	4	2.34322	repr
C19orf42	212509_s_at	79086	0.562397	0.0589567	0.184394	-1.78066	0.0886972	0.226871	4	2.34305	repr
TMEM50B	219600_s_at	757	0.713358	0.126408	0.286917	-1.62838	0.00924533	0.0441192	4	2.34174	repr
TGIF2	218724_s_at	60436	-1.77224	7.31219e-05	0.00991172	0.56853	0.213962	0.410628	1	2.34077	IND
C12orf51	211034_s_at	283450	-0.00366034	0.993298	0.995846	2.33516	0.000306957	0.00329137	5	2.33882	IND
TIPARP	212665_at	25976	-0.358245	0.462352	0.643997	-1.97955	0.00177357	0.0129165	3	2.3378	repr
CCDC131	213065_at	196441	-0.526902	0.0604529	0.187465	1.80915	0.00145405	0.011069	1	2.33605	IND
PCDHA12	210674_s_at	56137	1.01217	0.0175901	0.0909794	1.32069	0.051415	0.154157	2	2.33286	IND			PCDHA12
POMZP3	210910_s_at	22932	-0.303961	0.200825	0.379397	2.02765	0.00018024	0.0021709	1	2.33161	IND
GABRA5	206456_at	2558	-1.32291	0.0786111	0.217725	1.00848	0.258034	0.461718	1	2.3314	IND			GABRA5
ICAM4	207194_s_at	3386	-1.2557	0.0131394	0.0777314	-1.07568	0.0341168	0.115152	3	2.33138	repr
TMEM127	219460_s_at	55654	1.1402	0.00791283	0.0592746	-1.18861	0.0216182	0.0821516	4	2.3288	repr
IQGAP1	213446_s_at	8826	0.0351371	0.942157	0.967747	-2.29188	0.0144843	0.0611538	5	2.32702	repr
PPIB	200968_s_at	5479	1.36832	0.00142728	0.0268867	-0.958395	0.314294	0.523501	4	2.32672	repr		PPIB
PTP4A1	200730_s_at	7803	1.24658	0.00271847	0.0363109	-1.07854	0.119118	0.278319	4	2.32512	repr
HUWE1	208598_s_at	10075	0.0488568	0.869131	0.928957	2.27453	4.89491e-07	1.64741e-05	5	2.32339	IND
JUP	201015_s_at	3728	0.594387	0.348831	0.538088	1.72846	0.0502862	0.151377	2	2.32284	IND
SETX	201964_at	23064	0.786351	0.0575445	0.181307	1.53594	0.000918438	0.00774615	2	2.32229	IND
NIT1	202891_at	4817	-0.726379	0.13408	0.297755	1.59526	6.70514e-05	0.000997124	1	2.32164	IND
ITGA7	216331_at	3679	0.582983	0.246196	0.430247	-1.73689	0.0209481	0.0801721	4	2.31988	repr		ITGA7
MAP3K11	203652_at	4296	-0.513309	0.156241	0.326017	1.80637	0.00019682	0.00231898	1	2.31968	IND
METTL3	209265_s_at	56339	-1.05945	0.0122421	0.0742335	1.26008	0.0568778	0.166422	1	2.31953	IND			METTL3
KLHL24	221985_at	54800	0.958165	0.0445635	0.155025	-1.36115	0.0103087	0.0477363	4	2.31931	repr
CREM	207630_s_at	1390	0.817117	0.152509	0.321375	1.50166	0.0104041	0.0479887	2	2.31878	IND
OASL	205660_at	8638	0.0667294	0.806258	0.890559	-2.2511	3.9936e-06	9.49019e-05	5	2.31783	repr
DUSP10	221563_at	11221	0.620966	0.170974	0.344298	-1.69589	2.29084e-08	1.2891e-06	4	2.31685	repr		DUSP10
ARL1	201659_s_at	400	1.03341	0.00512419	0.0471158	-1.28066	0.00637325	0.0334839	4	2.31408	repr
EPHB3	1438_at	2049	-1.1998	0.0839325	0.226373	1.11423	0.0303724	0.105978	1	2.31403	IND	EPHB3
PDLIM5	216804_s_at	10611	0.688774	0.0916336	0.238811	-1.62504	0.00234641	0.0160864	4	2.31381	repr
MTR	203774_at	4548	-1.60907	0.000194631	0.0116294	0.70459	0.0929385	0.233882	1	2.31366	IND
AQP1	209047_at	358	0.975603	0.0198866	0.096537	1.33753	0.292479	0.500072	2	2.31314	IND
GTF2IRD1	218412_s_at	9569	0.0300125	0.934711	0.964324	2.28174	1.73062e-05	0.000330793	5	2.31175	IND
HIF1A	200989_at	3091	0.643892	0.0387307	0.143745	-1.66737	0.0242826	0.0895197	4	2.31126	repr
ACTG2	202274_at	72	1.69748	0.0711159	0.20608	-0.613331	0.527123	0.71447	4	2.31081	repr
PCM1	202174_s_at	5108	-0.364537	0.176628	0.350808	1.94606	0.00821486	0.0405497	1	2.31059	IND
FXYD6	217897_at	53826	-0.271135	0.390086	0.576017	2.03728	0.118878	0.277896	1	2.30841	IND
C5orf5	218518_at	51306	1.24977	0.000587246	0.0178795	-1.05864	0.0424599	0.135016	4	2.3084	repr
PRRG1	205618_at	5638	-0.0230003	0.927382	0.960425	-2.28451	2.9936e-07	1.12583e-05	5	2.30751	repr
ACCN1	206690_at	40	-1.11854	0.0577455	0.181737	1.18844	0.00475725	0.0272941	1	2.30698	IND	ACCN1
RHBDL2	219489_s_at	54933	0.858239	0.161307	0.331798	-1.44786	0.0559374	0.164492	4	2.3061	repr
PLD3	201050_at	23646	0.709145	0.126331	0.286917	1.59614	0.097005	0.240763	2	2.30528	IND
ID2	201566_x_at	3398	-1.3534	0.0104218	0.0679399	0.951755	0.133517	0.300916	1	2.30516	IND	ID2
MRPS16	218046_s_at	51021	-1.09462	0.017407	0.0906972	1.21031	0.019838	0.0775436	1	2.30493	IND
APTX	218527_at	54840	-0.335937	0.226073	0.407741	1.96867	3.59338e-07	1.27656e-05	1	2.30461	IND
PICALM	215236_s_at	8301	1.01516	0.0197657	0.0962824	-1.28913	0.0736109	0.199353	4	2.3043	repr
GUCY1A3	221942_s_at	2982	-0.0105619	0.968693	0.98194	-2.29188	1.18928e-05	0.000237654	5	2.30244	repr
SFRS1	201742_x_at	6426	-1.31011	0.00523917	0.047379	0.991647	0.280786	0.487305	1	2.30176	IND	SFRS1
RANGRF	218526_s_at	29098	-2.14554	5.35974e-05	0.00991172	0.155598	0.843195	0.922875	1	2.30113	IND
RBBP4	217301_x_at	5928	-0.837569	0.0177147	0.0912861	1.46235	0.173921	0.359151	1	2.29992	IND
IFI30	201422_at	10437	-0.523216	0.328403	0.518749	1.77655	0.0566072	0.165837	1	2.29976	IND
CUL7	36084_at	9820	0.621743	0.195155	0.372315	1.67715	1.25464e-06	3.66188e-05	2	2.29889	IND
RNF44	203286_at	22838	0.356393	0.21097	0.391542	1.93987	0.00283777	0.0184994	2	2.29627	IND	RNF44
FDX1	203646_at	2230	-1.54407	0.000622165	0.0179924	0.751597	0.2158	0.41266	1	2.29566	IND	FDX1
TLE1	203221_at	7088	1.20288	0.00827234	0.0607313	-1.09267	0.0599925	0.172852	4	2.29555	repr		TLE1
CDC45L	204126_s_at	8318	-2.25532	0.000901014	0.0214678	-0.0377197	0.951168	0.97875	5	2.29304	repr	CDC45L
MAPRE2	202501_at	10982	-0.333613	0.212521	0.392727	-1.95937	0.00202443	0.0143547	3	2.29299	repr
SERPINB6	211474_s_at	5269	0.106232	0.668526	0.798507	-2.1864	0.0122348	0.0543304	4	2.29263	repr
LRP1	200785_s_at	4035	1.0527	0.0135947	0.0792079	-1.23948	0.00465172	0.0268199	4	2.29218	repr
SH3BGRL3	221269_s_at	83442	1.78666	0.000406547	0.0161562	-0.500536	0.603181	0.774536	4	2.2872	repr
AKTIP	218373_at	64400	0.444434	0.0874682	0.231471	-1.84241	0.000639725	0.00590529	4	2.28685	repr
CYFIP2	215785_s_at	26999	0.195113	0.593151	0.742412	2.09156	0.0186682	0.0739369	2	2.28668	IND
CD63	200663_at	967	1.07156	0.00194245	0.0307038	-1.21388	0.0335146	0.113775	4	2.28544	repr
TLN2	212703_at	83660	1.0503	0.0175767	0.0909794	-1.23393	0.0211727	0.0807641	4	2.28423	repr		TLN2
POGZ	212153_at	23126	0.191045	0.404534	0.591701	2.09174	0.000241616	0.00273676	2	2.28278	IND
CSNK1D	208774_at	1453	0.713997	0.0121467	0.0739097	1.56809	0.00554591	0.0305003	2	2.28209	IND
FBL	211623_s_at	2091	-1.03819	0.00120313	0.0253071	1.24258	0.134645	0.302431	1	2.28076	IND	FBL
GDF10	206159_at	2662	-1.20542	0.117534	0.274651	-1.07497	0.17407	0.359151	3	2.2804	repr			GDF10
PECAM1	208982_at	5175	0.243673	0.308138	0.498729	2.03661	0.014621	0.0615094	2	2.28028	IND
CCNF	204827_s_at	899	-2.25573	0.00441373	0.0435052	0.0241787	0.918979	0.962635	5	2.27991	IND	CCNF
MRPL48	218281_at	51642	-1.23895	0.000908548	0.0214678	1.04069	0.00586531	0.0315995	1	2.27964	IND
C7orf44	209445_x_at	55744	-1.10685	0.0119423	0.0729821	1.17187	0.000167266	0.00204974	1	2.27872	IND
DCTN1	201082_s_at	1639	-0.353189	0.474067	0.653201	1.92545	0.0203195	0.0787947	1	2.27864	IND
DHRS3	202481_at	9249	-0.305104	0.718518	0.833178	-1.97094	0.00799799	0.0398427	3	2.27605	repr
PECI	218025_s_at	10455	-0.939946	0.0071615	0.0563468	-1.33522	0.0714553	0.195515	3	2.27517	repr
PRAME	204086_at	23532	-0.724823	0.171249	0.344654	1.54909	0.0964319	0.240107	1	2.27392	IND
TBC1D12	221858_at	23232	0.109056	0.631586	0.770745	-2.16454	4.07415e-05	0.00066337	4	2.2736	repr
AKAP1	210625_s_at	8165	-1.91726	0.000636728	0.0182089	-0.355433	0.381432	0.589853	3	2.2727	repr
TARBP2	203677_s_at	6895	-1.03571	0.0242368	0.109038	1.23611	0.0011941	0.00962122	1	2.27181	IND
CEBPG	204203_at	1054	0.341574	0.437366	0.621443	-1.93012	6.84857e-05	0.00101203	4	2.27169	repr
FLJ14213	219383_at	79899	-1.45636	0.00410946	0.0420262	0.815051	0.00693762	0.0357242	1	2.27141	IND	FLJ14213
MERTK	206028_s_at	10461	-0.597501	0.0342675	0.133835	1.67213	0.00734246	0.0373711	1	2.26963	IND
RALA	214435_x_at	5898	1.15147	0.0863573	0.229831	-1.11755	0.0476285	0.145534	4	2.26902	repr
ZFAND5	217741_s_at	7763	0.431148	0.261088	0.448253	-1.83779	0.004805	0.0274783	4	2.26894	repr
VLDLR	209822_s_at	7436	1.02654	0.0260842	0.113815	-1.24155	0.000768086	0.00676185	4	2.26809	repr
C14orf130	218108_at	55148	-1.64606	0.0022072	0.0322774	0.621397	0.340452	0.549757	1	2.26746	IND
LARS	217810_x_at	51520	-0.969715	0.0175047	0.0909794	1.29738	0.000162585	0.00200308	1	2.26709	IND
CACNA1G	210380_s_at	8913	-0.725332	0.0466538	0.159071	1.54085	0.000136999	0.00174891	1	2.26618	IND
ZNF395	221123_x_at	55893	-0.267091	0.462606	0.644095	1.9989	0.000285094	0.00312847	1	2.26599	IND
FAM26B	57715_at	51063	-0.406279	0.262345	0.449643	-1.85898	5.36565e-05	0.000825864	3	2.26526	repr
TIMM13	218188_s_at	26517	-0.856029	0.00420438	0.0422676	1.40919	0.0200717	0.078175	1	2.26522	IND
RAP2C	218669_at	57826	1.01378	0.0169111	0.0897129	-1.25113	0.00895445	0.043023	4	2.2649	repr
IFI44	214453_s_at	10561	-0.0116803	0.980433	0.988726	-2.2527	0.00398871	0.0239559	5	2.26438	repr
NDUFS8	203190_at	4728	-0.0617455	0.821581	0.90156	2.20237	0.00130752	0.0103304	5	2.26411	IND
INTS8	218905_at	55656	-0.845843	0.00707144	0.0559511	1.41551	0.0358321	0.119508	1	2.26135	IND
MRPS31	212604_at	10240	-0.670391	0.0126452	0.0759575	1.59081	0.00645393	0.0337775	1	2.2612	IND	MRPS31		MRPS31
JAM3	212813_at	83700	0.602313	0.047064	0.160159	-1.65821	0.0116464	0.0524125	4	2.26052	repr
SMARCB1	212167_s_at	6598	-0.518915	0.0939229	0.242264	1.74052	0.000345563	0.00363876	1	2.25943	IND
SEC24D	202375_at	9871	0.538768	0.141001	0.305358	-1.72044	2.94686e-06	7.40294e-05	4	2.25921	repr		SEC24D
EXOSC2	214507_s_at	23404	-1.97087	0.000390569	0.016054	0.288316	0.412868	0.617633	1	2.25919	IND	EXOSC2
PBX1	205253_at	5087	0.891625	0.0220759	0.10312	1.36645	0.00224094	0.0154596	2	2.25807	IND	PBX1
STX10	212625_at	8677	-0.994776	0.0028267	0.036585	1.26304	0.00332215	0.0210522	1	2.25781	IND
SIN3B	209352_s_at	23309	0.751524	0.0306789	0.125244	1.50411	0.00702345	0.0360605	2	2.25563	IND
WDR67	214061_at	93594	-0.990694	0.0042258	0.0422924	1.26453	0.00129771	0.0103026	1	2.25522	IND
BNIP3	201848_s_at	664	-0.837752	0.015855	0.0859734	1.41495	0.0383999	0.125764	1	2.25271	IND
CBX5	209715_at	23468	-1.12282	0.000865125	0.0209838	1.12861	0.0161647	0.066299	1	2.25143	IND	CBX5
ALCAM	201952_at	214	0.685029	0.0421444	0.150555	1.56633	0.109976	0.26294	2	2.25136	IND
POFUT2	209578_s_at	23275	2.17053	0.000769515	0.0199733	-0.0786681	0.799022	0.902294	5	2.24919	repr
TLE4	204872_at	7091	0.999052	0.11987	0.277855	-1.24979	0.0269598	0.0963082	4	2.24884	repr
SULT1C4	205812_s_at	27233	1.20173	0.000684305	0.0187701	-1.04428	0.141424	0.312038	4	2.246	repr
ATP10D	213238_at	57205	0.696631	0.111172	0.26707	-1.54911	0.0202349	0.0786366	4	2.24574	repr
HBP1	209102_s_at	26959	1.17908	0.0190198	0.0945827	-1.06523	0.0275341	0.0977168	4	2.24431	repr
C16orf53	218300_at	79447	-0.886782	0.04397	0.154037	1.35603	0.00014708	0.00184743	1	2.24281	IND
ANP32A	201051_at	8125	-0.457671	0.177639	0.351778	1.78375	0.0675213	0.188023	1	2.24142	IND	ANP32A
TCF3	209153_s_at	6929	-0.472161	0.158361	0.328244	1.7688	0.00233143	0.0159993	1	2.24096	IND	TCF3
TRMT5	221952_x_at	57570	-1.31121	0.00852618	0.0615585	0.92717	0.0717483	0.195991	1	2.23839	IND			TRMT5
SYT11	209197_at	23208	1.40617	0.0336498	0.13223	0.832126	0.466273	0.660371	2	2.2383	IND		SYT11
WDR70	219193_at	55100	-0.458401	0.129656	0.291654	1.7798	2.12205e-05	0.000390746	1	2.2382	IND
CHMP2B	202536_at	25978	0.351949	0.19269	0.369584	-1.88427	9.4545e-05	0.00129372	4	2.23622	repr
TMCO6	221096_s_at	55374	-0.956993	0.00846822	0.0613445	1.27863	0.00256502	0.0172248	1	2.23562	IND
UBE2G2	209041_s_at	7327	-1.38088	0.0130742	0.0774762	0.850361	0.0303892	0.105978	1	2.23124	IND
EXT1	201995_at	2131	1.29735	0.00571003	0.0498531	-0.932951	0.0702815	0.193412	4	2.2303	repr	EXT1		EXT1
NSUN5B	213670_x_at	155400	0.288119	0.41189	0.599122	1.94171	0.000349537	0.00366962	2	2.22983	IND
TNNT1	213201_s_at	7138	-0.648927	0.104251	0.258297	1.57918	0.128389	0.292805	1	2.22811	IND	TNNT1
VIM	201426_s_at	7431	1.12983	0.0031176	0.037845	-1.09819	0.248481	0.451048	4	2.22802	repr
POP1	213449_at	10940	-2.04727	0.00333023	0.0390807	0.180705	0.379977	0.588713	1	2.22797	IND	POP1
WBP5	217975_at	51186	1.31097	0.00452738	0.0439103	-0.916302	0.26848	0.473304	4	2.22727	repr
PRRC1	221734_at	133619	1.92319	0.00015489	0.0114732	-0.303639	0.423261	0.624679	4	2.22683	repr
MAPK6	207121_s_at	5597	0.543401	0.163328	0.333968	-1.68342	0.0248374	0.0911489	4	2.22682	repr
SERINC3	211769_x_at	10955	1.01325	0.011093	0.0702954	-1.21272	0.110701	0.264046	4	2.22597	repr		SERINC3
KIAA0515	212069_s_at	84726	-0.16818	0.594536	0.7428	2.0565	5.2184e-05	0.000813885	1	2.22468	IND
COX8A	201119_s_at	1351	-0.836098	0.0194914	0.095542	1.3879	0.00632615	0.0333319	1	2.224	IND
HIVEP2	212642_s_at	3097	0.290254	0.390121	0.576017	-1.9337	0.000721654	0.00643677	4	2.22395	repr
CRABP1	205350_at	1381	0.874112	0.415043	0.602189	1.34823	0.107348	0.259123	2	2.22235	IND
C2CD2	212875_s_at	25966	0.934144	0.021957	0.102753	-1.287	0.102355	0.250536	4	2.22114	repr
GAS7	202191_s_at	8522	-0.13993	0.569201	0.724794	-2.0806	0.0137537	0.0590981	3	2.22053	repr
PTDSS1	201433_s_at	9791	-0.673118	0.0389798	0.144061	1.54658	0.0128386	0.0563712	1	2.2197	IND
YPEL5	217783_s_at	51646	-1.96831	0.000164444	0.0114732	-0.25065	0.791227	0.899243	3	2.21896	repr	YPEL5
ARF4	201096_s_at	378	1.37783	0.000312013	0.0143444	-0.840186	0.184151	0.373075	4	2.21801	repr			ARF4
SEC11A	201290_at	23478	0.914352	0.00286318	0.0366995	-1.3031	0.0422365	0.134735	4	2.21746	repr
AVPI1	218631_at	60370	1.0158	0.0378704	0.141643	-1.20066	0.0464778	0.143137	4	2.21646	repr
POPDC3	212221_x_at	64208	1.23825	0.00155812	0.0279587	-0.977577	0.359353	0.568631	4	2.21583	repr
ARHGAP1	202117_at	392	0.515224	0.0754074	0.212762	-1.70049	0.00165499	0.0122949	4	2.21572	repr
STC2	203438_at	8614	0.971153	0.0447784	0.155311	-1.24456	0.0309038	0.1074	4	2.21572	repr
ZNF512B	55872_at	57473	-0.478817	0.191458	0.368183	1.73608	0.000182528	0.00218199	1	2.2149	IND
NIPBL	213918_s_at	25836	-0.662534	0.14177	0.306645	-1.5518	0.000992882	0.00822606	3	2.21434	repr
TSPAN4	209263_x_at	7106	-0.37649	0.383023	0.57	-1.83751	0.000583347	0.00553	3	2.214	repr		TSPAN4
ELF4	31845_at	2000	-0.195291	0.555482	0.715306	-2.01651	0.0136576	0.0588288	3	2.2118	repr
FAM108A1	221267_s_at	81926	-0.584389	0.0394668	0.14489	1.62604	0.0459218	0.141984	1	2.21043	IND
B3GNT1	203188_at	11041	-1.25867	0.00463925	0.0444118	0.951571	0.281952	0.488124	1	2.21024	IND
KIF2A	213598_at	3796	-1.07068	0.00402566	0.0419118	1.13937	0.0145734	0.0613459	1	2.21004	IND
NCK2	203315_at	8440	0.89873	0.0534133	0.172502	-1.31057	0.00814052	0.0403811	4	2.2093	repr
TIA1	201448_at	7072	-0.125454	0.745251	0.850161	2.07991	0.000685498	0.00621744	1	2.20536	IND	TIA1
NPDC1	218086_at	56654	-0.515772	0.0848004	0.227713	1.68946	0.00992595	0.0465771	1	2.20523	IND
TMEM30A	217743_s_at	55754	0.958224	0.0370854	0.139633	-1.24654	0.0223367	0.0839298	4	2.20476	repr
RTN4	211509_s_at	57142	0.802985	0.0106831	0.0689089	-1.40044	0.0130039	0.0568347	4	2.20343	repr
TOPBP1	202633_at	11073	-1.22174	0.00184024	0.0298955	0.979955	0.0397042	0.128641	1	2.20169	IND
NRBP1	217765_at	29959	1.78218	0.000712681	0.0192069	0.418979	0.369745	0.57924	2	2.20116	IND		NRBP1	NRBP1
NFATC1	211105_s_at	4772	0.708997	0.0322483	0.128922	-1.4918	0.00741897	0.0376244	4	2.20079	repr
LOC388344	212191_x_at	388344	-0.466244	0.0768666	0.215584	1.73296	0.00383513	0.0231955	1	2.19921	IND
GMNN	218350_s_at	51053	-1.77596	0.00273255	0.036403	0.422672	0.576153	0.753843	1	2.19863	IND	GMNN
XIST	221728_x_at	7503	0.471559	0.330431	0.520433	-1.72671	0.257472	0.461064	4	2.19826	repr
ARHGAP19	37577_at	84986	-1.54712	0.00021566	0.0122335	0.649533	0.0952921	0.237774	1	2.19665	IND	ARHGAP19
LSM2	209449_at	57819	-1.199	0.000574981	0.0178795	0.99756	0.0953269	0.237776	1	2.19656	IND	LSM2
UBR4	211950_at	23352	1.12531	0.0247494	0.110043	1.06998	0.16747	0.349965	2	2.1953	IND
NAB1	211139_s_at	4664	-1.84652	0.000351182	0.0153488	0.348122	0.39917	0.605396	1	2.19464	IND
RAD50	208393_s_at	10111	-0.274696	0.41868	0.605095	1.91992	5.8365e-05	0.000889002	1	2.19461	IND
SMARCC1	201072_s_at	6599	-0.73583	0.0328672	0.13032	1.45857	0.00156034	0.0117133	1	2.1944	IND	SMARCC1
OAZ2	201365_at	4947	0.729458	0.019001	0.0945827	-1.46465	0.000649011	0.00596751	4	2.19411	repr
HNRNPA1	216559_x_at	3178	-1.29024	0.00597693	0.051208	0.903239	0.091748	0.232142	1	2.19348	IND
CTH	217127_at	1491	1.03338	0.0304043	0.124702	-1.15975	0.0138924	0.059476	4	2.19312	repr
RANBP1	202483_s_at	5902	-0.959319	0.00308072	0.0377523	1.23315	0.090242	0.2297	1	2.19247	IND	RANBP1
GCHFR	204867_at	2644	-1.39056	0.0354527	0.136644	0.801874	0.249671	0.452276	1	2.19244	IND
HIST1H4C	205967_at	8364	-1.49728	0.00667341	0.0543296	0.694697	0.369833	0.579248	1	2.19198	IND			HIST1H4C
LY6E	202145_at	4061	-0.439554	0.208923	0.389465	1.75138	0.00507333	0.0286633	1	2.19093	IND
BTG3	213134_x_at	10950	0.1652	0.578369	0.732094	-2.02539	0.00809472	0.0401823	4	2.19059	repr
MTX1	213448_at	4580	2.05471	0.00158296	0.0280041	-0.135757	0.579081	0.755614	4	2.19046	repr	MTX1
RGS10	204319_s_at	6001	-0.414294	0.211709	0.392091	1.77547	0.0461568	0.142436	1	2.18977	IND
SH3PXD2A	213252_at	9644	-0.131376	0.610576	0.754134	2.05797	5.04935e-07	1.69129e-05	1	2.18935	IND
UPF3B	218757_s_at	65109	-0.0968979	0.688668	0.812385	2.0921	0.000398018	0.00405748	5	2.189	IND	UPF3B
MXRA8	213422_s_at	54587	0.514505	0.168811	0.340919	-1.67447	0.0573065	0.167342	4	2.18898	repr
CHIC2	219492_at	26511	0.788103	0.018159	0.0924915	-1.39989	0.0456546	0.141469	4	2.18799	repr
MRPL4	218105_s_at	51073	-0.713368	0.11718	0.274474	1.47448	0.000978271	0.00814338	1	2.18784	IND
CCNL1	220046_s_at	57018	0.648564	0.0298072	0.12297	-1.53844	0.125685	0.288251	4	2.187	repr
MAP2K1	202670_at	5604	0.600061	0.0995461	0.251069	-1.58682	0.0181862	0.0725181	4	2.18688	repr
RIPK2	209545_s_at	8767	0.754457	0.0242148	0.109038	-1.43143	0.00850439	0.0416283	4	2.18588	repr
ZNF532	220617_s_at	55205	-0.407509	0.163915	0.334682	1.77833	0.0209492	0.0801721	1	2.18584	IND
PPA2	220741_s_at	27068	-0.854667	0.0259284	0.113534	1.33038	0.00420565	0.0248384	1	2.18504	IND
NARG2	218713_at	79664	-0.903479	0.0024787	0.0347425	1.28099	0.000135371	0.00173502	1	2.18447	IND
NDUFA8	218160_at	4702	-0.504522	0.0549558	0.175948	1.67931	0.0377059	0.124227	1	2.18383	IND
CAST	212586_at	831	0.276667	0.241254	0.424669	-1.90569	0.0420277	0.134313	4	2.18236	repr		CAST
TCFL5	204849_at	10732	-0.903429	0.0172524	0.0903065	1.27764	0.110648	0.264009	1	2.18107	IND
ADO	212502_at	84890	-0.703886	0.0198603	0.096537	1.47701	0.0310608	0.107839	1	2.1809	IND
EHD1	208112_x_at	10938	1.03268	0.000838287	0.0208253	-1.14787	0.0303769	0.105978	4	2.18055	repr
RPP25	219143_s_at	54913	-1.33407	0.007013	0.0558025	0.842762	0.0189063	0.0745444	1	2.17683	IND
QPRT	204044_at	23475	-1.92487	0.0182715	0.0927955	0.246569	0.74818	0.872318	1	2.17144	IND
RAMP2	205779_at	10266	-1.31796	0.0176035	0.0909794	0.851905	0.0862275	0.222333	1	2.16986	IND
NPTX2	213479_at	4885	1.32658	0.0748985	0.212092	0.842961	0.43998	0.640218	2	2.16954	IND
RPL10A	200036_s_at	4736	-0.67501	0.0195543	0.0955836	1.49407	0.0148788	0.0623332	1	2.16908	IND			RPL10A
PMS1	213677_s_at	5378	-1.05169	0.0072396	0.0567075	1.11677	0.0664639	0.185814	1	2.16846	IND
MMP14	202827_s_at	4323	1.93233	0.0221085	0.10312	0.23588	0.750775	0.874184	2	2.16821	IND
HLA-DMA	217478_s_at	3108	-0.165896	0.64567	0.781284	2.00156	0.15756	0.33574	1	2.16746	IND
C17orf90	50374_at	339229	-0.821825	0.00640509	0.0526325	1.34494	7.16607e-05	0.00104145	1	2.16676	IND
SASH1	213236_at	23328	1.10814	0.0180422	0.0922303	-1.05822	0.0575189	0.16774	4	2.16636	repr
ATP5G2	208764_s_at	517	-0.766544	0.0137901	0.0794746	1.39949	0.0321258	0.110231	1	2.16604	IND
SPAST	209748_at	6683	-0.635969	0.0474893	0.161138	1.52902	2.85635e-05	0.000501037	1	2.16499	IND
UCKL1	218533_s_at	54963	0.0786642	0.824392	0.902954	2.08607	0.00213163	0.0149045	5	2.16474	IND
IRF3	202621_at	3661	-0.80732	0.0163731	0.0875808	1.35647	0.0129164	0.0566068	1	2.16379	IND
CPSF3L	217994_x_at	54973	-0.916472	0.0072608	0.0567472	1.24653	0.00215611	0.0149862	1	2.163	IND
NUP93	202188_at	9688	-0.663141	0.0224136	0.103859	1.49967	0.00685136	0.0353576	1	2.16281	IND
C16orf33	218493_at	79622	-0.737277	0.129601	0.291623	1.42498	0.088464	0.226765	1	2.16225	IND
MLC1	213395_at	23209	-0.441359	0.347446	0.53658	1.72016	0.0999223	0.246356	1	2.16152	IND
SYN1	221914_at	6853	-0.837279	0.154106	0.323481	1.32354	0.187191	0.377446	1	2.16081	IND			SYN1
THY1	213869_x_at	7070	0.583857	0.196597	0.3744	-1.57482	0.120777	0.28047	4	2.15868	repr
VAMP7	202829_s_at	6845	0.34464	0.22613	0.407741	-1.81353	0.025235	0.0922092	4	2.15817	repr
SFRS18	212179_at	25957	-0.0100996	0.96212	0.978529	2.14788	0.00130896	0.0103304	5	2.15798	IND
WWOX	219077_s_at	51741	-1.90329	0.00288551	0.0367693	0.253793	0.673359	0.825733	1	2.15709	IND			WWOX
REEP1	204365_s_at	65055	0.288783	0.383175	0.570032	1.86716	0.104738	0.254922	2	2.15594	IND
GCLC	202923_s_at	2729	0.606247	0.14999	0.31778	-1.54825	0.016936	0.0687013	4	2.1545	repr
RNU2	210230_at	6066	-0.156991	0.588839	0.740284	1.99732	0.00131149	0.0103304	1	2.15431	IND
ELN	212670_at	2006	-1.69328	0.0436549	0.153688	-0.459779	0.518801	0.706944	3	2.15306	repr
MPHOSPH9	215731_s_at	10198	-1.13866	0.0118964	0.0727645	1.01408	0.00374016	0.0227777	1	2.15274	IND
LEPROTL1	202594_at	23484	0.0821827	0.709791	0.826903	2.07046	0.000590591	0.00557101	5	2.15264	IND
PPP1CA	200846_s_at	5499	-0.74035	0.0101945	0.0671426	1.41159	0.0727097	0.197773	1	2.15194	IND
HADH	211569_s_at	3033	-1.65867	0.00156625	0.027962	0.492377	0.444128	0.643498	1	2.15104	IND
HIST1H2BK	209806_at	85236	1.92023	0.0225066	0.104084	-0.229593	0.767932	0.884789	4	2.14983	repr			HIST1H2BK
UCHL5IP	207891_s_at	55559	-1.82547	0.00278928	0.0364365	0.324229	0.146717	0.320299	1	2.14969	IND
ARC	210090_at	23237	-1.04585	0.0694483	0.203372	-1.10343	0.0267164	0.0956514	3	2.14928	repr
CLDN1	218182_s_at	9076	-0.777211	0.133123	0.296751	1.37132	0.0169547	0.0687374	1	2.14853	IND	CLDN1
GSDMDC1	218154_at	79792	-0.492138	0.0992863	0.250765	1.65604	0.00455946	0.0263961	1	2.14818	IND
NSUN5C	213460_x_at	260294	0.174306	0.636241	0.774009	1.97386	0.00082341	0.00713284	2	2.14817	IND
H2AFX	212525_s_at	3014	-2.02966	0.000496286	0.0170891	0.118314	0.661544	0.817722	1	2.14797	IND
MCCC2	209623_at	64087	-0.903328	0.00603518	0.0515813	1.24388	0.00907966	0.0435057	1	2.14721	IND
FAM134B	218532_s_at	54463	-0.642219	0.0384145	0.142897	1.50276	0.0226139	0.0846938	1	2.14498	IND
C11orf75	219806_s_at	56935	0.681298	0.0360495	0.137774	-1.46161	0.117766	0.276306	4	2.14291	repr
LTBP4	213176_s_at	8425	-1.24044	0.0330727	0.130712	0.900447	0.0502032	0.151298	1	2.14088	IND
THOC6	218848_at	79228	-1.72885	0.00947167	0.0649717	0.411792	0.233312	0.434274	1	2.14064	IND
R3HDM1	202754_at	23518	-0.669291	0.0392654	0.144603	1.47131	0.0269865	0.0963082	1	2.1406	IND	R3HDM1
DNAJB6	209015_s_at	10049	1.19616	0.153848	0.323035	-0.943653	0.00506203	0.0286454	4	2.13981	repr			DNAJB6
RLF	204243_at	6018	0.479763	0.221542	0.40246	-1.65856	8.62462e-06	0.000179844	4	2.13832	repr
SCAMP4	213244_at	113178	0.510465	0.121017	0.279275	1.62709	4.93225e-05	0.000781385	2	2.13756	IND
FUCA1	202838_at	2517	-0.639552	0.363115	0.552137	1.49577	0.112737	0.267361	1	2.13532	IND	FUCA1
PBRM1	220355_s_at	55193	-0.575056	0.0615677	0.189697	1.56023	0.00080267	0.00699626	1	2.13528	IND
INCENP	219769_at	3619	-2.13248	0.00319704	0.0382558	4.08542e-06	0.999964	1	5	2.13248	IND
NDUFS2	201966_at	4720	-0.835548	0.00406367	0.0419118	1.2963	0.00959628	0.0454547	1	2.13185	IND	NDUFS2
TBK1	218520_at	29110	0.34404	0.326056	0.517365	-1.78768	1.35893e-06	3.80896e-05	4	2.13172	repr
EIF4EBP1	221539_at	1978	-0.473932	0.285609	0.473591	1.65737	0.00534289	0.0297797	1	2.1313	IND
NRCAM	204105_s_at	4897	1.93775	0.0107648	0.0692137	0.192656	0.83317	0.918333	2	2.1304	IND
PLP2	201136_at	5355	-1.66988	0.0004791	0.0170891	-0.460323	0.616125	0.783551	3	2.1302	repr
COG5	203630_s_at	10466	0.684474	0.100079	0.251599	-1.44388	0.00369236	0.0225844	4	2.12835	repr
CXorf40A	213315_x_at	91966	0.946672	0.00198425	0.0309472	-1.18074	0.0134148	0.0580319	4	2.12741	repr
ING2	205981_s_at	3622	-1.04842	0.00141865	0.0268867	-1.07893	0.0302028	0.105584	3	2.12735	repr
KIF22	216969_s_at	3835	-1.99804	0.00248126	0.0347425	0.129194	0.728687	0.860804	1	2.12723	IND
DDX11	210206_s_at	1663	-1.82964	0.000523178	0.0171355	0.297408	0.368875	0.578135	1	2.12704	IND
MPDZ	205079_s_at	8777	1.17196	0.00186902	0.0299729	-0.953925	0.108383	0.260727	4	2.12588	repr
TAX1BP3	209154_at	30851	0.223845	0.646904	0.781843	-1.90153	0.0424242	0.135016	4	2.12537	repr
SMG7	201794_s_at	9887	0.327896	0.401563	0.588825	1.7967	5.78047e-05	0.000885835	2	2.12459	IND
ZNF330	209814_at	27309	-0.188209	0.615679	0.758306	-1.93621	5.04871e-05	0.000792693	3	2.12442	repr
NFE2L2	201146_at	4780	0.266365	0.398389	0.585636	-1.85724	9.31096e-05	0.00128167	4	2.1236	repr
C20orf111	209020_at	51526	0.816301	0.0234253	0.106718	-1.30666	0.0447252	0.139635	4	2.12297	repr
PPP2R1B	202886_s_at	5519	-0.906181	0.0322274	0.128922	-1.21667	0.000375459	0.00387809	3	2.12285	repr
AKAP2	202759_s_at	11217	0.810002	0.132761	0.296551	-1.31135	0.10285	0.251546	4	2.12135	repr
NTHL1	209731_at	4913	-1.73414	0.00064002	0.0182263	0.386277	0.240924	0.443397	1	2.12042	IND
ISOC1	218170_at	51015	-1.04523	0.00776921	0.0586359	-1.07461	0.0476721	0.145604	3	2.11984	repr
MADD	210252_s_at	8567	-0.425923	0.196718	0.3744	1.69328	5.93582e-07	1.93299e-05	1	2.11921	IND
KIAA0100	201729_s_at	9703	-0.396946	0.0995234	0.251069	1.72017	0.000872971	0.00748839	1	2.11711	IND
EP400	212375_at	57634	0.270896	0.305604	0.496907	1.84568	5.27256e-07	1.73305e-05	2	2.11657	IND
SLC17A5	221041_s_at	26503	1.78728	0.0171466	0.0902788	-0.329098	0.29175	0.499218	4	2.11638	repr
C14orf122	219203_at	51016	-1.16884	0.0801373	0.220621	0.947272	0.0230771	0.0858405	1	2.11611	IND
INPP5A	203006_at	3632	-0.678693	0.0732412	0.209471	-1.43628	0.0538428	0.159674	3	2.11497	repr
S100A4	203186_s_at	6275	-0.0655976	0.851342	0.919422	-2.04937	0.0951439	0.237657	5	2.11497	repr
COL16A1	204345_at	1307	0.545545	0.223106	0.40404	-1.56856	0.023695	0.0878601	4	2.1141	repr
PAQR4	212858_at	124222	-0.718503	0.0152015	0.0841647	1.39518	9.22945e-07	2.79827e-05	1	2.11368	IND
JRK	216309_x_at	8629	0.838208	0.0178195	0.0914909	1.27503	0.000424956	0.00427631	2	2.11323	IND
RPS6KA3	203843_at	6197	-0.345441	0.188131	0.36455	-1.76688	0.000151803	0.0018966	3	2.11232	repr
RAB5B	201276_at	5869	0.864592	0.0837001	0.226093	1.24748	0.0183943	0.0731403	2	2.11207	IND
PCNA	201202_at	5111	-1.48657	0.000465662	0.0169713	0.625448	0.391785	0.59883	1	2.11202	IND
CSTF3	203947_at	1479	-0.543452	0.183558	0.358881	1.56827	0.00024471	0.00275848	1	2.11173	IND			CSTF3
IER2	202081_at	9592	-0.423918	0.383052	0.57	-1.68637	0.115727	0.272979	3	2.11029	repr
TIPIN	219258_at	54962	-1.54155	0.000194052	0.0116294	0.568444	0.103742	0.253024	1	2.10999	IND
UHRF1BP1L	213118_at	23074	-0.157859	0.553358	0.713913	-1.95132	5.58873e-10	4.85322e-08	3	2.10918	repr
SSFA2	202506_at	6744	1.23558	0.00755173	0.0579268	0.873551	0.0857521	0.221432	2	2.10913	IND
SOX12	204432_at	6666	-1.06017	0.00169039	0.0288007	1.04896	0.000419439	0.00423899	1	2.10913	IND
SLC35E2	217122_s_at	9906	-0.291266	0.460384	0.642539	1.81731	0.0206919	0.0796962	1	2.10858	IND
TEX264	218548_x_at	51368	-0.562648	0.127722	0.288695	1.54569	0.00236313	0.0161538	1	2.10834	IND			TEX264
SFRS9	201698_s_at	8683	-0.702024	0.00959156	0.0654247	1.4057	0.00617803	0.0327972	1	2.10773	IND
NIF3L1	218133_s_at	60491	-1.12999	0.00818064	0.0605712	0.975054	0.0525341	0.156778	1	2.10504	IND	NIF3L1
MLL4	203419_at	9757	0.342112	0.397366	0.584376	1.76279	0.000385463	0.00394665	2	2.10491	IND
NAT10	217884_at	55226	-0.741382	0.0279187	0.118704	1.36331	0.00404894	0.0241973	1	2.10469	IND
PILRB	220954_s_at	29990	0.412081	0.232542	0.414497	1.69038	0.00815769	0.0404115	2	2.10247	IND
GPBP1L1	217877_s_at	60313	0.111441	0.659656	0.791138	1.98998	0.000798619	0.00697382	2	2.10142	IND
RNF13	201779_s_at	11342	0.243252	0.353688	0.542486	-1.85811	0.0186636	0.0739369	4	2.10136	repr
ATP5G1	208972_s_at	516	-1.83871	0.00824319	0.0607313	0.262052	0.473524	0.667444	1	2.10076	IND
FKBP3	218003_s_at	2287	-0.834905	0.015285	0.0844318	1.26568	0.00051317	0.00497881	1	2.10058	IND
DEF8	219646_at	54849	1.59393	0.000851302	0.0208643	-0.50623	0.312543	0.521887	4	2.10016	repr
CYTL1	219837_s_at	54360	-0.712261	0.300428	0.491901	1.38514	0.0788056	0.209335	1	2.0974	IND
NAP1L4	201414_s_at	4676	-0.438725	0.103832	0.257619	1.65616	0.00649049	0.0339226	1	2.09488	IND
FAM82B	218549_s_at	51115	-1.45056	0.000265927	0.0135768	0.644322	0.210399	0.407061	1	2.09488	IND
PRPF8	200000_s_at	10594	-0.474458	0.0584109	0.183175	1.62	0.0121623	0.0541285	1	2.09445	IND
FKBP9	212169_at	11328	0.592122	0.182848	0.358455	-1.50211	0.0679475	0.188835	4	2.09423	repr
MED8	213127_s_at	112950	1.7764	0.00154207	0.0278125	-0.317578	0.395038	0.601579	4	2.09398	repr
FAM60A	220147_s_at	58516	-0.153031	0.625124	0.765544	1.9407	0.0114073	0.0515341	1	2.09373	IND
C11orf2	217969_at	738	-1.29393	0.00420633	0.0422676	0.799453	0.225984	0.426457	1	2.09339	IND
ZXDC	218639_s_at	79364	-0.941532	0.0346859	0.13487	1.15129	0.00537459	0.0298617	1	2.09282	IND
SMARCC2	201321_s_at	6601	-0.199016	0.376013	0.563699	1.89223	1.71751e-06	4.68253e-05	1	2.09125	IND
LAMB3	209270_at	3914	-0.704208	0.0454945	0.157021	1.38647	0.0595463	0.1718	1	2.09067	IND	LAMB3
FAM21C	211068_x_at	253725	1.30961	0.000609395	0.0178795	0.780997	0.0800457	0.211511	2	2.09061	IND
FBXL6	219189_at	26233	-1.27625	0.00200311	0.0310975	0.813235	0.0340831	0.115094	1	2.08948	IND
SLCO2B1	203473_at	11309	0.378564	0.186813	0.363317	1.71018	0.00428939	0.025185	2	2.08875	IND
CAV1	203065_s_at	857	-1.81753	0.000439204	0.0165746	-0.270837	0.828604	0.915983	3	2.08837	repr	CAV1		CAV1
CASP8AP2	222201_s_at	9994	-1.0236	0.0569621	0.180077	1.06344	0.00494811	0.0281594	1	2.08704	IND
USP22	200083_at	23326	-0.335358	0.148372	0.315397	1.75072	0.00203228	0.0143813	1	2.08608	IND
OTUB1	38710_at	55611	-0.45865	0.30635	0.497545	1.62707	0.0472173	0.144591	1	2.08572	IND
MYC	202431_s_at	4609	-1.0805	0.0910008	0.237568	-1.00469	0.172763	0.357836	3	2.08519	repr	MYC
SDC4	202071_at	6385	-0.588872	0.226073	0.407741	-1.49605	0.165385	0.346741	3	2.08492	repr
C21orf45	219004_s_at	54069	-1.25668	0.00259259	0.0354915	0.827697	0.0903912	0.229867	1	2.08438	IND
SLC27A5	219733_s_at	10998	-1.34892	0.00917553	0.0641682	0.734111	0.244376	0.446646	1	2.08303	IND
PAPSS1	209043_at	9061	-0.440766	0.102342	0.255184	1.64072	0.0227698	0.0851023	1	2.08149	IND
BRD3	203825_at	8019	-0.0636445	0.845159	0.916401	2.01753	0.000285959	0.00313277	5	2.08117	IND
RAB20	219622_at	55647	0.609622	0.0332052	0.131069	-1.47135	0.0103545	0.0478538	4	2.08098	repr
ZNF32	209538_at	7580	-0.672241	0.0382003	0.142396	1.4083	0.00211466	0.0148005	1	2.08054	IND
ZNF580	220748_s_at	51157	-0.242147	0.355295	0.544594	1.83815	9.16542e-05	0.00126659	1	2.0803	IND
ZNF76	207494_s_at	7629	0.169003	0.465617	0.646223	1.91037	1.59719e-08	9.68504e-07	2	2.07937	IND
PYGB	201481_s_at	5834	1.47253	0.00372668	0.0409333	-0.605841	0.122087	0.282859	4	2.07837	repr
CALCRL	210815_s_at	10203	-1.22632	0.0504939	0.167175	0.851934	0.0764322	0.204887	1	2.07826	IND
TUBGCP3	203690_at	10426	-1.50098	0.000473276	0.0170719	0.577149	0.137827	0.306879	1	2.07813	IND
CD99	201028_s_at	4267	-0.914616	0.0285141	0.119881	1.1627	0.212323	0.408724	1	2.07732	IND
CA11	209726_at	770	-0.752361	0.0907378	0.237099	1.32496	0.122772	0.2837	1	2.07732	IND
BZW1L1	200776_s_at	151579	0.244267	0.327052	0.518126	-1.83298	0.000290823	0.00315201	4	2.07724	repr
LOC654342	214110_s_at	654342	0.923155	0.0418959	0.150278	-1.15389	0.0119931	0.0535312	4	2.07704	repr
C6orf134	218874_s_at	79969	0.437396	0.0953526	0.244549	1.63961	3.07143e-05	0.00052311	2	2.07701	IND
RPL39L	210115_at	116832	-0.975337	0.0269867	0.116323	1.10074	0.091319	0.231528	1	2.07608	IND
SECISBP2	218265_at	79048	-0.671617	0.0187456	0.0937147	1.40444	0.000176497	0.00214048	1	2.07605	IND			SECISBP2
POGK	218229_s_at	57645	-0.950594	0.088444	0.233338	1.12383	0.0808218	0.212524	1	2.07442	IND
PHC2	200919_at	1912	0.64621	0.0265857	0.115363	1.42815	0.00140278	0.0108074	2	2.07436	IND
SETD5	221806_s_at	55209	0.369038	0.138225	0.302606	1.7048	0.000722009	0.00643677	2	2.07384	IND
ARL4A	205020_s_at	10124	-0.200845	0.619528	0.761331	-1.87234	0.0471413	0.144422	3	2.07318	repr
CD320	218529_at	51293	-1.25991	0.00396355	0.0419118	0.812896	0.103817	0.25312	1	2.07281	IND
BRD8	202227_s_at	10902	-0.100545	0.783221	0.874473	1.97118	2.8807e-05	0.000501555	1	2.07173	IND
ANXA7	201366_at	310	0.588904	0.056428	0.178957	-1.48221	0.000181794	0.00218199	4	2.07112	repr
NEDD9	202150_s_at	4739	1.16826	0.0099815	0.066574	-0.902649	0.0584333	0.169493	4	2.0709	repr
WIPF1	202664_at	7456	0.176506	0.437296	0.621443	-1.89439	0.0105776	0.048661	4	2.0709	repr
FGFR2	203638_s_at	2263	-0.246165	0.481826	0.659403	-1.82431	0.0732541	0.198869	3	2.07047	repr
ACSL1	201963_at	2180	0.105804	0.751329	0.853751	-1.96283	0.0293807	0.103229	4	2.06864	repr		ACSL1
LSM1	203534_at	27257	0.54114	0.131378	0.294069	1.52563	0.00182161	0.0132095	2	2.06677	IND
STX7	212632_at	8417	1.21407	0.0014336	0.0268905	-0.8524	0.210642	0.407199	4	2.06647	repr
ZNF133	216960_s_at	7692	-0.173989	0.673678	0.802844	1.8924	2.43263e-07	9.50619e-06	1	2.06639	IND
BRD7	221776_s_at	29117	-0.647738	0.0493334	0.164616	1.41697	0.00415984	0.0247131	1	2.0647	IND
FIG4	203656_at	9896	-0.890807	0.0156	0.0853527	1.17355	0.0167391	0.0680889	1	2.06436	IND
ILF3	208930_s_at	3609	-1.44323	0.000774465	0.0200279	0.620116	0.415343	0.619681	1	2.06335	IND	ILF3
CRY1	209674_at	1407	0.756721	0.0236728	0.107637	-1.30487	0.00574641	0.0311801	4	2.06159	repr
SDCBP	200958_s_at	6386	1.03632	0.00276094	0.0364365	-1.02408	0.133578	0.300956	4	2.0604	repr
PRKX	204060_s_at	5613	-0.198336	0.674815	0.803462	1.8619	0.00412368	0.0245397	1	2.06024	IND
NONO	208698_s_at	4841	-0.699483	0.0160776	0.0865605	1.36062	0.0353093	0.118192	1	2.0601	IND
MDFI	205375_at	4188	-1.03357	0.00789574	0.0592097	1.02646	0.000420696	0.00424559	1	2.06003	IND	MDFI
LRFN4	219491_at	78999	-1.11358	0.00529611	0.0475771	0.945534	0.0313205	0.108634	1	2.05912	IND
GBP1	202269_x_at	2633	0.707503	0.347955	0.536971	-1.35129	0.066322	0.185712	4	2.0588	repr
PFKM	210976_s_at	5213	-1.10811	0.00133472	0.0262247	0.949786	0.332163	0.541719	1	2.0579	IND
RFXANK	202758_s_at	8625	-0.42819	0.121562	0.280258	1.62923	0.0023946	0.0163055	1	2.05742	IND
RAD51C	209849_s_at	5889	-0.770293	0.0160066	0.0864086	1.28646	0.00223041	0.0154264	1	2.05676	IND	RAD51C
DNAJB2	202500_at	3300	1.57868	0.00123585	0.0253071	0.47772	0.365438	0.575054	2	2.0564	IND
ZMYND8	209049_s_at	23613	-0.317576	0.298418	0.489523	1.73757	0.00338415	0.0212727	1	2.05515	IND
SIRT1	218878_s_at	23411	-0.84885	0.00853278	0.0615585	-1.20489	0.0137931	0.0591591	3	2.05374	repr
RBM12	212170_at	10137	-0.435488	0.119775	0.277854	1.61822	4.6726e-10	4.32462e-08	1	2.0537	IND
LMBR1L	220036_s_at	55716	1.23346	0.00341003	0.0394633	-0.819519	0.0332669	0.113331	4	2.05297	repr
FLAD1	205661_s_at	80308	-0.924527	0.0489084	0.163902	1.12809	0.000991418	0.00822363	1	2.05261	IND
TSC2	215735_s_at	7249	-0.404651	0.251445	0.436922	1.64681	0.00623551	0.0329779	1	2.05146	IND
SET	200631_s_at	6418	-0.792424	0.00407498	0.0419421	1.25866	0.0425142	0.135016	1	2.05108	IND
CKS1B	201897_s_at	1163	-0.920219	0.0342304	0.133835	1.13043	0.229286	0.429658	1	2.05065	IND
TRIM16	204341_at	10626	1.62175	0.0663109	0.198228	-0.427764	0.263587	0.468317	4	2.04952	repr
CHAF1B	204775_at	8208	-1.99444	0.000981643	0.0224526	-0.0528753	0.78408	0.894747	5	2.04731	repr	CHAF1B
GOLGA8A	210425_x_at	23015	0.51678	0.286665	0.475118	1.53025	0.0965768	0.240383	2	2.04703	IND
MTERFD1	219363_s_at	51001	-0.849174	0.0365546	0.138537	1.19623	0.00345449	0.0215225	1	2.0454	IND
BIRC2	202076_at	329	0.786754	0.00734981	0.0571887	-1.25723	0.0798867	0.21117	4	2.04398	repr
JARID1B	201548_s_at	10765	0.714437	0.0131728	0.0778623	1.32657	0.0425589	0.13509	2	2.041	IND	JARID1B
POU4F1	206940_s_at	5457	-1.72515	0.00863401	0.0617497	0.315385	0.461933	0.657387	1	2.04053	IND
NAB2	212803_at	4665	0.311229	0.246339	0.430313	1.72872	9.24732e-06	0.000190192	2	2.03995	IND
RAE1	201558_at	8480	0.63387	0.129889	0.291928	1.40539	0.0283497	0.100308	2	2.03926	IND	RAE1		RAE1
CHST3	209834_at	9469	0.511635	0.137796	0.302171	-1.5266	1.78647e-05	0.000338706	4	2.03824	repr		CHST3
CDC42BPA	214464_at	8476	0.103642	0.646587	0.781594	-1.93426	0.00670294	0.0348397	4	2.0379	repr
ZNF423	214761_at	23090	0.196366	0.750424	0.853433	-1.84036	0.000638737	0.00590529	4	2.03673	repr		ZNF423
NGFR	205858_at	4804	-1.33658	0.00462121	0.044346	0.699828	0.100563	0.247331	1	2.03641	IND	NGFR
ROCK2	202762_at	9475	-0.079452	0.899895	0.946105	-1.95535	0.00630012	0.0332473	5	2.0348	repr
C12orf24	204521_at	29902	-1.21192	0.00706	0.055932	0.8223	0.242798	0.445098	1	2.03421	IND
MCCC1	218440_at	56922	-1.29612	0.0048647	0.0457375	0.737728	0.0314414	0.108892	1	2.03385	IND
GLS	221510_s_at	2744	0.711863	0.0740503	0.21102	-1.32066	0.0220059	0.0832263	4	2.03252	repr	GLS	GLS
BLMH	202179_at	642	-1.2911	0.0200727	0.0969722	0.737984	0.123932	0.285547	1	2.02909	IND	BLMH
MRE11A	205395_s_at	4361	-1.56066	0.0012347	0.0253071	0.468354	0.158086	0.336452	1	2.02902	IND
RAI16	218337_at	64760	1.03491	0.00181305	0.0297967	0.993653	0.0145254	0.0612534	2	2.02856	IND
PPOX	204788_s_at	5498	-0.852421	0.012677	0.0760189	1.17592	0.025065	0.0917312	1	2.02834	IND
TIMM9	218316_at	26520	-0.824638	0.0393921	0.144843	1.20347	0.00563365	0.0308622	1	2.02811	IND
ATXN10	208832_at	25814	-1.16136	0.0106264	0.0686372	0.8667	0.0230574	0.0858125	1	2.02806	IND
POLD2	201115_at	5425	-1.01599	0.00151925	0.0276135	1.01196	0.0348064	0.116982	1	2.02795	IND
BTBD2	207722_s_at	55643	-0.89935	0.00345075	0.0395964	1.12857	0.00137582	0.0107083	1	2.02792	IND
NOTCH2	210756_s_at	4853	0.921286	0.146579	0.312531	-1.10636	0.0539672	0.15987	4	2.02765	repr
PRPF31	202407_s_at	26121	-1.47373	0.0171711	0.0902788	0.552252	0.305713	0.514569	1	2.02598	IND
ERLIN1	202444_s_at	10613	-1.55806	0.0212709	0.100551	-0.466701	0.247002	0.449291	3	2.02476	repr
SPG11	203513_at	80208	-0.735591	0.0155479	0.0853527	1.2891	0.0371681	0.122915	1	2.02469	IND
ZNF672	218068_s_at	79894	-0.83692	0.0293971	0.122125	1.18749	0.00649129	0.0339226	1	2.02441	IND			ZNF672
HNRPUL1	208713_at	11100	-0.528499	0.0723747	0.207789	1.49558	0.00510741	0.0288096	1	2.02408	IND
ELOVL5	208788_at	60481	0.372225	0.238335	0.420703	-1.64959	0.0355283	0.118664	4	2.02181	repr
ITPR3	201189_s_at	3710	-1.89819	0.015585	0.0853527	0.122379	0.886979	0.946021	1	2.02057	IND
ANXA11	214783_s_at	311	-0.0445095	0.854353	0.92006	-1.97545	0.0006657	0.00608912	5	2.01996	repr
LYRM1	203897_at	57149	0.178911	0.641185	0.778408	-1.84034	0.00113461	0.00924777	4	2.01926	repr
KHK	211028_s_at	3795	-1.58996	0.0253305	0.111638	0.42892	0.394425	0.601019	1	2.01888	IND	KHK
EFS	204400_at	10278	-0.826548	0.00999092	0.066574	1.19116	0.00876518	0.0424032	1	2.01771	IND
ARMCX3	217858_s_at	51566	1.81464	9.77067e-05	0.00991172	-0.202672	0.708237	0.847523	4	2.01731	repr
TRAF3	221571_at	7187	-0.851715	0.0200439	0.0969662	1.16546	0.00349869	0.0217401	1	2.01717	IND
CKLF	219161_s_at	51192	-1.27801	0.0261426	0.113932	-0.737595	0.26599	0.470887	3	2.0156	repr		CKLF
TPRKB	219030_at	51002	-0.435393	0.121893	0.280652	1.57797	0.00138426	0.0107448	1	2.01337	IND			TPRKB
CCDC47	217814_at	57003	0.468818	0.173626	0.347539	-1.54408	0.0113914	0.0514957	4	2.0129	repr
SLC38A2	220924_s_at	54407	1.1082	0.000615309	0.0178846	-0.904685	0.27457	0.480075	4	2.01289	repr
TOP1	208900_s_at	7150	0.644055	0.0404513	0.147342	-1.36801	0.170676	0.354348	4	2.01206	repr
XPO7	208459_s_at	23039	-0.974179	0.109388	0.264502	1.03597	0.188942	0.379266	1	2.01015	IND	XPO7
TMEM38B	218772_x_at	55151	-0.153695	0.674912	0.803462	-1.85619	4.55335e-07	1.56235e-05	3	2.00988	repr
PAWR	204005_s_at	5074	-0.174732	0.838874	0.912564	-1.83377	8.43307e-06	0.000177069	3	2.0085	repr
CKS2	204170_s_at	1164	-0.596149	0.137853	0.302171	1.41233	0.259209	0.462995	1	2.00848	IND
MAT2A	200769_s_at	4144	-1.37936	0.00389459	0.0418237	0.628892	0.283694	0.489934	1	2.00825	IND
COX15	219547_at	1355	-0.820809	0.0186	0.0932521	1.18517	0.000811086	0.0070492	1	2.00598	IND
EPHB4	202894_at	2050	0.374965	0.155917	0.325629	1.63059	6.59263e-06	0.000146286	2	2.00555	IND
SNRP70	201221_s_at	6625	-0.518455	0.0678563	0.200969	1.48666	0.00510375	0.0288096	1	2.00511	IND
NXT1	218708_at	29107	-0.681556	0.015698	0.0855306	-1.32347	0.0187145	0.0740787	3	2.00503	repr
VEGFA	210512_s_at	7422	0.20594	0.688094	0.812258	-1.7985	0.0414585	0.132856	4	2.00444	repr	VEGFA
SOX2	213721_at	6657	-1.1784	0.0137554	0.0794746	0.825801	0.0563832	0.165388	1	2.0042	IND
RAD23A	201039_s_at	5886	-0.819556	0.0190336	0.0945827	1.1845	0.0690879	0.191339	1	2.00406	IND
GCN5L2	202182_at	2648	-0.6114	0.0502135	0.166464	1.39201	0.00311062	0.0199818	1	2.00341	IND
TEAD4	41037_at	7004	-1.69324	0.0168317	0.0894569	0.309414	0.400497	0.606479	1	2.00265	IND
ATP6V0C	36994_at	527	0.569794	0.0484759	0.162992	1.43266	0.0570117	0.166653	2	2.00246	IND
DEGS1	209250_at	8560	0.541648	0.112541	0.268994	-1.45998	0.00256682	0.0172248	4	2.00162	repr
PCDHGC3	205717_x_at	5098	0.793259	0.0495682	0.165087	1.20836	0.174904	0.360059	2	2.00162	IND
FOXO1	202724_s_at	2308	1.26451	0.00274242	0.0364365	-0.736918	0.128059	0.292458	4	2.00143	repr
SS18L1	213140_s_at	26039	0.510567	0.181376	0.35627	1.49071	0.00145175	0.0110635	2	2.00128	IND
DDIT3	209383_at	1649	1.47742	0.0114598	0.0712084	-0.52354	0.085645	0.221237	4	2.00096	repr
CNN2	201605_x_at	1265	1.25293	0.0324409	0.129359	-0.747525	0.110586	0.264009	4	2.00046	repr
ARHGEF1	203055_s_at	9138	-0.670733	0.0100662	0.0668014	1.32877	0.00337612	0.0212602	1	1.99951	IND
SEMA4A	219259_at	64218	0.273924	0.370311	0.558954	-1.7241	0.000182405	0.00218199	4	1.99802	repr
CITED2	207980_s_at	10370	-0.580677	0.208299	0.388745	1.41732	0.0374903	0.12369	1	1.998	IND	CITED2
GMDS	204875_s_at	2762	-0.568139	0.183675	0.358881	1.42948	0.00123216	0.00988257	1	1.99762	IND
GOLGB1	201057_s_at	2804	1.82606	5.22214e-05	0.00991172	-0.170926	0.763677	0.882633	4	1.99699	repr			GOLGB1
EFEMP2	209356_x_at	30008	0.855987	0.112256	0.268849	-1.14096	0.0752209	0.202411	4	1.99694	repr
ENPEP	204844_at	2028	-0.279513	0.253349	0.439147	-1.71561	0.00344158	0.0214826	3	1.99513	repr
CAPN2	208683_at	824	0.331535	0.327775	0.518514	-1.66253	0.105718	0.256509	4	1.99406	repr
ARL6IP4	218216_x_at	51329	-1.076	0.00628899	0.0525319	0.91684	0.0290713	0.102397	1	1.99284	IND
PRPF18	221547_at	8559	0.364692	0.191091	0.367886	-1.62789	0.000518358	0.00502222	4	1.99258	repr
HELZ	203674_at	9931	0.521853	0.240199	0.423236	1.47069	0.00259952	0.0173318	2	1.99254	IND
QARS	217846_at	5859	-1.18697	0.00568168	0.0498316	0.805506	0.287361	0.494085	1	1.99248	IND
KIAA0317	202128_at	9870	0.627262	0.0506649	0.167313	1.36395	0.0208937	0.0800857	2	1.99121	IND
TUFM	201113_at	7284	-0.545133	0.041378	0.149402	1.44599	0.0261225	0.0943737	1	1.99112	IND
UBE2Z	217750_s_at	65264	-0.303539	0.177331	0.351464	1.68732	2.98408e-05	0.000514118	1	1.99086	IND
DERA	218102_at	51071	-1.05904	0.00244519	0.0346066	-0.930869	0.0719178	0.19615	3	1.98991	repr
PPP2R2A	202313_at	5520	-0.252984	0.251424	0.436922	1.73679	0.00607353	0.0323645	1	1.98978	IND	PPP2R2A
FAM57A	218898_at	79850	0.583466	0.180055	0.354764	-1.40399	0.000355687	0.00371754	4	1.98745	repr			FAM57A
PTENP1	217492_s_at	11191	0.566406	0.0651815	0.196438	-1.42083	0.0363274	0.120816	4	1.98724	repr
TRHDE	219937_at	29953	-1.58275	0.000764858	0.0199272	0.404483	0.407967	0.613086	1	1.98723	IND	TRHDE
SERINC1	208671_at	57515	1.00919	0.00406042	0.0419118	-0.977041	0.181641	0.369848	4	1.98623	repr
MTHFD2	201761_at	10797	0.113074	0.687974	0.812258	-1.87222	0.0484843	0.147508	4	1.9853	repr
USP11	208723_at	8237	-0.0156672	0.963238	0.978849	1.96886	0.0469834	0.144126	5	1.98453	IND
KCTD5	218474_s_at	54442	1.13753	0.00636236	0.0526325	-0.845613	0.108589	0.261078	4	1.98315	repr
TAF5	210053_at	6877	-1.52459	0.00526495	0.0474182	-0.45844	0.35524	0.56469	3	1.98303	repr	TAF5
PDCD5	219275_at	9141	-1.24775	0.00042793	0.0163618	0.73499	0.0404976	0.13057	1	1.98274	IND
BAT3	210208_x_at	7917	-0.398755	0.156537	0.326441	1.58354	0.000502655	0.00489028	1	1.98229	IND
AMD1	201196_s_at	262	-0.0537193	0.840524	0.913195	-1.92767	0.00204541	0.0144597	5	1.98139	repr
HIST1H2BG	210387_at	8339	0.92988	0.0673005	0.199912	1.05054	0.125241	0.287609	2	1.98042	IND
MAPBPIP	218291_at	28956	-0.636985	0.0361021	0.137787	1.34254	0.00446836	0.0260401	1	1.97952	IND
DFNA5	203695_s_at	1687	0.721098	0.0364209	0.138313	-1.25804	0.0502941	0.151377	4	1.97914	repr
BOLA2	209836_x_at	552900	-0.19361	0.365113	0.554208	1.78523	0.00439221	0.0257028	1	1.97884	IND
NDRG1	200632_s_at	10397	0.735485	0.0721734	0.207465	-1.2432	0.134621	0.302431	4	1.97869	repr
TTC19	217964_at	54902	-0.600719	0.0526865	0.171097	1.37786	0.0379809	0.12484	1	1.97858	IND
C10orf56	212423_at	219654	0.401865	0.215115	0.395353	-1.57669	0.0483908	0.147351	4	1.97855	repr
SLC7A11	209921_at	23657	1.94579	0.0035046	0.0397657	-0.0325066	0.967929	0.985625	5	1.97829	repr
PTCD3	217895_at	55037	-0.853333	0.00349793	0.0397657	1.12455	0.0743929	0.200875	1	1.97788	IND
TCTA	203054_s_at	6988	1.17503	0.0208052	0.0992835	-0.802757	0.0617335	0.17616	4	1.97779	repr
TUBGCP4	211337_s_at	27229	-1.31024	0.00341896	0.0394633	0.66734	0.101377	0.248548	1	1.97758	IND
GPR172A	222155_s_at	79581	0.899708	0.0221515	0.10312	1.07778	0.163749	0.344404	2	1.97749	IND
U1SNRNPBP	205300_s_at	11066	-0.714744	0.0185671	0.09322	1.26245	7.85441e-05	0.00111387	1	1.9772	IND
EEF1E1	204905_s_at	9521	-0.605323	0.0244535	0.109526	1.37162	0.0239059	0.0884558	1	1.97694	IND
RBM9	213901_x_at	23543	0.351274	0.480667	0.658807	1.6246	0.0497495	0.150455	2	1.97587	IND
SEPT8	208999_at	23176	-1.30317	0.00937922	0.0647956	-0.672449	0.236984	0.438901	3	1.97561	repr
SMAD1	210993_s_at	4086	-0.329135	0.211875	0.392191	1.64589	0.00237085	0.0161908	1	1.97503	IND
C16orf45	212736_at	89927	0.563154	0.237096	0.419662	-1.40858	0.117704	0.276253	4	1.97173	repr
CCT3	200910_at	7203	-0.0847765	0.707049	0.824363	1.88633	0.00213818	0.0149206	5	1.97111	IND
PRPF4B	211090_s_at	8899	-1.06625	0.00668796	0.0543851	0.90372	0.170473	0.354242	1	1.96997	IND
NEK7	212530_at	140609	0.626861	0.14902	0.316296	-1.34301	0.0103815	0.0479155	4	1.96987	repr		NEK7
KPNA4	209653_at	3840	1.08442	0.0845929	0.227356	-0.884499	0.00879705	0.0424989	4	1.96892	repr
C1orf112	220840_s_at	55732	-1.50498	0.00342883	0.0394633	0.4628	0.0906479	0.23027	1	1.96778	IND
USP1	202413_s_at	7398	-1.13327	0.0166957	0.0889717	0.833999	0.316875	0.52618	1	1.96727	IND	USP1
SAFB	201747_s_at	6294	-1.36402	0.00100558	0.0225983	0.602898	0.0228851	0.0853627	1	1.96692	IND
NUP133	202184_s_at	55746	-0.680164	0.0259842	0.113594	1.28572	0.00567795	0.0310565	1	1.96589	IND
BAZ2A	201353_s_at	11176	0.422857	0.0775975	0.216318	1.54246	7.43309e-09	4.93249e-07	2	1.96531	IND
DOPEY1	213271_s_at	23033	-0.814618	0.0568117	0.179763	1.15039	0.00196354	0.0140471	1	1.965	IND
SATB1	203408_s_at	6304	1.09052	0.0763269	0.214582	0.874193	0.375221	0.583916	2	1.96472	IND		SATB1
CENPB	212437_at	1059	-1.55177	0.000455914	0.01679	0.412	0.092872	0.233809	1	1.96377	IND
RNF40	206845_s_at	9810	1.00639	0.189632	0.366287	0.957374	0.111209	0.264718	2	1.96377	IND
HSPD1	200806_s_at	3329	-0.362917	0.132686	0.296479	1.60068	0.0700602	0.192976	1	1.96359	IND
ACSL5	218322_s_at	51703	-0.316698	0.328636	0.519	-1.64632	0.000180213	0.0021709	3	1.96301	repr
ZC3H4	213390_at	23211	-0.950411	0.04633	0.158395	1.0123	0.0604114	0.173868	1	1.96271	IND
HES1	203394_s_at	3280	-1.02394	0.124755	0.284449	0.937449	0.24392	0.446403	1	1.96139	IND
AP3S1	202442_at	1176	0.429334	0.0877505	0.232044	-1.53043	0.0147765	0.0619785	4	1.95976	repr
RAB7A	211960_s_at	7879	0.263278	0.585542	0.738296	-1.69629	2.1824e-06	5.64376e-05	4	1.95957	repr
CDC25A	204695_at	993	-1.89999	0.00240997	0.0343458	0.0593394	0.883028	0.943699	5	1.95933	IND
CYHR1	213072_at	50626	1.00733	0.00157405	0.0280041	0.95178	0.00272075	0.0179192	2	1.95911	IND
PTEN	204053_x_at	5728	0.579295	0.0813748	0.22285	-1.37914	0.029987	0.105044	4	1.95843	repr
RBL2	212332_at	5934	-1.14663	0.00800691	0.0597249	0.810852	0.276094	0.481898	1	1.95748	IND
NOL8	218244_at	55035	0.124904	0.591914	0.741993	1.83247	0.000608717	0.00569377	2	1.95737	IND	NOL8
C8orf32	219060_at	55093	-1.25268	0.00562661	0.0494666	0.70361	0.00851783	0.0416651	1	1.95629	IND
MIF	217871_s_at	4282	-0.518229	0.046358	0.158395	1.43727	0.0540595	0.16004	1	1.9555	IND
ACACB	221928_at	32	-0.0731939	0.776472	0.869772	1.88174	0.0140847	0.0601166	5	1.95494	IND	ACACB
CCNL2	221427_s_at	81669	0.163922	0.554322	0.71448	1.79086	0.00793897	0.0396892	2	1.95479	IND
SEC23B	201583_s_at	10483	0.793555	0.028151	0.11907	1.15932	0.0381534	0.125173	2	1.95288	IND
TFDP1	204147_s_at	7027	-1.73917	0.0129717	0.0771283	0.213641	0.691232	0.839701	1	1.95281	IND
ALMS1	214220_s_at	7840	-0.592627	0.0769993	0.215782	1.35947	1.83292e-05	0.000344725	1	1.9521	IND
CNOT3	203239_s_at	4849	-0.479992	0.137854	0.302171	1.47125	0.00931855	0.0444384	1	1.95125	IND
MZF1	40569_at	7593	-0.0878441	0.701889	0.820968	1.86319	0.000222297	0.00255915	5	1.95103	IND
WDR18	209461_x_at	57418	-1.54143	0.00092718	0.0215433	0.409095	0.141494	0.312095	1	1.95052	IND
MYST3	202423_at	7994	0.124905	0.594224	0.7428	1.82538	0.00240773	0.0163633	2	1.95029	IND
TTLL12	216251_s_at	23170	-1.43344	0.0108328	0.0694942	0.514961	0.262201	0.466798	1	1.9484	IND
CAP1	213798_s_at	10487	0.591586	0.23108	0.412543	-1.35596	0.067126	0.187218	4	1.94754	repr
NOLA2	209104_s_at	55651	-0.710234	0.00878747	0.0625067	1.23651	0.00238959	0.0162872	1	1.94674	IND
MED22	206593_s_at	6837	-0.668057	0.0252571	0.11153	1.27838	3.55636e-05	0.000594191	1	1.94643	IND
UMPS	202706_s_at	7372	-0.881155	0.068003	0.201234	1.06506	0.00148639	0.0112786	1	1.94621	IND	UMPS
L1CAM	204584_at	3897	1.55139	0.00267282	0.0363109	0.3945	0.599757	0.772718	2	1.94589	IND		L1CAM
MYBBP1A	219098_at	10514	-1.09368	0.0185036	0.0932063	0.851784	0.00879634	0.0424989	1	1.94546	IND
PGRMC2	213227_at	10424	0.178273	0.5323	0.698154	-1.7671	0.000135417	0.00173502	4	1.94538	repr
UBAC1	202151_s_at	10422	-0.812829	0.05854	0.183335	1.13184	0.0706457	0.19411	1	1.94467	IND
OGT	207563_s_at	8473	0.431931	0.369704	0.558474	1.51188	0.0671744	0.187279	2	1.94381	IND
ACTR1B	202135_s_at	10120	-1.10304	0.000881319	0.0213031	0.840072	0.0227663	0.0851023	1	1.94311	IND
WTAP	203137_at	9589	-0.124585	0.64158	0.778619	-1.81844	0.0002249	0.00257897	3	1.94302	repr
ACACA	212186_at	31	-0.268996	0.427893	0.613243	1.67389	0.000742749	0.00657191	1	1.94289	IND
KIAA1305	220911_s_at	57523	-0.615361	0.179458	0.354183	1.32741	6.95161e-05	0.00101658	1	1.94277	IND
RPL27	213642_at	6155	-0.869159	0.0219062	0.102657	1.07314	0.200344	0.394863	1	1.9423	IND
KCTD9	218823_s_at	54793	-0.279574	0.428618	0.614033	-1.66102	5.24641e-07	1.73255e-05	3	1.94059	repr
SOCS1	210001_s_at	8651	0.739858	0.0294814	0.122344	-1.20018	0.0123821	0.0548619	4	1.94004	repr
H3F3A	213826_s_at	3020	-0.860317	0.0356421	0.137148	1.0785	0.267715	0.47255	1	1.93882	IND
DUSP22	218845_at	56940	-0.227234	0.380297	0.567701	-1.70947	0.00515419	0.0290501	3	1.9367	repr
MGC3196	220934_s_at	79064	-0.754976	0.0341221	0.133564	1.18154	0.000402195	0.00408821	1	1.93652	IND	MGC3196
ZNF432	219848_s_at	9668	0.509585	0.219367	0.400092	1.42634	0.000566431	0.00540607	2	1.93593	IND
AGPAT5	218096_at	55326	-0.720749	0.0610528	0.188837	1.21472	0.0258361	0.0937594	1	1.93546	IND
SSX1	206626_x_at	6756	-0.749592	0.0484247	0.162898	1.18578	0.0276935	0.098233	1	1.93537	IND
PIP5K1C	212518_at	23396	1.23407	0.00052376	0.0171355	0.701073	0.372149	0.581194	2	1.93514	IND
RBM7	218379_at	10179	0.658798	0.0583411	0.183038	-1.27608	1.57719e-05	0.000305745	4	1.93488	repr
LDOC1	204454_at	23641	0.740823	0.0329404	0.130464	-1.19381	0.158945	0.337667	4	1.93463	repr			LDOC1
CD58	211744_s_at	965	-0.578965	0.0431311	0.152684	-1.35438	0.00762818	0.038436	3	1.93335	repr
CYC1	201066_at	1537	-0.942973	0.00961381	0.0654253	0.990129	0.231224	0.431086	1	1.9331	IND
DCHS1	218892_at	8642	0.920117	0.0729985	0.209238	1.0122	0.00428502	0.0251803	2	1.93232	IND
PUS1	218670_at	80324	-1.07444	0.0212018	0.100427	0.857783	0.0332875	0.113331	1	1.93223	IND
ECM1	209365_s_at	1893	0.779677	0.0134193	0.0786595	-1.15224	0.0433503	0.136758	4	1.93192	repr		ECM1
PDHA1	200980_s_at	5160	-0.896712	0.0041612	0.0420544	1.03489	0.144737	0.316916	1	1.9316	IND	PDHA1
SOCS2	203373_at	8835	0.210641	0.400211	0.58736	-1.72054	0.0402638	0.130035	4	1.93118	repr
FZD6	203987_at	8323	0.762796	0.173964	0.347986	-1.16739	0.0348389	0.117028	4	1.93019	repr
KLHL20	204177_s_at	27252	1.125	0.0277301	0.118143	-0.804858	0.0348086	0.116982	4	1.92986	repr
RRN3	216908_x_at	54700	1.4333	0.0137827	0.0794746	0.496091	0.366341	0.576056	2	1.9294	IND
JMJD6	212723_at	23210	1.19122	0.00327865	0.0387597	-0.736908	0.0656947	0.184617	4	1.92813	repr
CALU	200755_s_at	813	1.1633	0.00468597	0.0445267	-0.764491	0.291158	0.498436	4	1.9278	repr		CALU
AP1S2	203300_x_at	8905	0.788718	0.0316949	0.127694	1.13907	0.242789	0.445098	2	1.92779	IND
CDCA8	221520_s_at	55143	-1.49162	0.00291492	0.0368502	0.436031	0.43932	0.64016	1	1.92766	IND	CDCA8
SMAD6	207069_s_at	4091	1.37266	0.0102568	0.0672744	-0.554703	0.131043	0.29734	4	1.92736	repr	SMAD6
FAM18B	218446_s_at	51030	0.790026	0.013793	0.0794746	-1.13631	0.000955333	0.00799978	4	1.92633	repr
ARMC1	218185_s_at	55156	-0.661183	0.0521335	0.170329	1.26431	0.00201326	0.0143188	1	1.9255	IND
PFTK1	211502_s_at	5218	-1.61654	0.00511228	0.0470678	0.308692	0.233103	0.433999	1	1.92523	IND	PFTK1
LOC727942	213388_at	727942	0.4953	0.148934	0.31624	-1.42918	0.0140006	0.0598666	4	1.92448	repr
ACP6	218795_at	51205	-0.563259	0.0813907	0.22285	1.3593	0.000618887	0.00575066	1	1.92256	IND
PAXIP1	212825_at	22976	-1.41869	0.0117739	0.0725302	0.502899	0.248854	0.451376	1	1.92159	IND	PAXIP1
CECR5	218592_s_at	27440	-0.781134	0.0152326	0.0842344	1.1401	0.0448206	0.139706	1	1.92123	IND
MLF1	204784_s_at	4291	0.910964	0.0443588	0.15477	-1.00979	0.234932	0.435903	4	1.92076	repr
PGM3	210041_s_at	5238	1.0552	0.0104042	0.0678882	-0.864892	0.00681296	0.035237	4	1.92009	repr
PRKCZ	202178_at	5590	-0.359264	0.472483	0.652103	1.55929	0.0581066	0.169103	1	1.91855	IND
NDFIP1	217800_s_at	80762	0.772754	0.0127064	0.0760655	1.14575	0.112274	0.266622	2	1.9185	IND
CKAP5	212832_s_at	9793	-0.364162	0.166073	0.33791	1.55411	0.0160026	0.0658645	1	1.91827	IND
EXOSC10	207541_s_at	5394	-0.535789	0.0650047	0.196073	1.38219	0.00113306	0.00924589	1	1.91798	IND
ILK	201234_at	3611	0.638879	0.0171727	0.0902788	-1.27898	0.0101714	0.0472875	4	1.91785	repr
TFPT	218996_at	29844	0.872965	0.00705158	0.055932	1.04386	0.0353198	0.118192	2	1.91683	IND
ARPC3	208736_at	10094	0.236926	0.349903	0.539179	1.6791	0.00803333	0.0399339	2	1.91603	IND
CBR4	213626_at	84869	-0.839186	0.0195294	0.0955443	1.07642	0.00961436	0.0455097	1	1.91561	IND
TXNDC5	221253_s_at	81567	0.62473	0.0435232	0.153532	-1.29074	0.133034	0.300212	4	1.91546	repr
UTP18	203721_s_at	51096	-0.602416	0.0260098	0.113616	1.3129	0.0836359	0.2178	1	1.91531	IND
RAB5C	201140_s_at	5878	0.493979	0.0505131	0.167175	1.42095	0.000359833	0.00374973	2	1.91493	IND
G6PD	202275_at	2539	1.67736	0.0425535	0.151402	0.237514	0.671863	0.824551	2	1.91488	IND
PLTP	202075_s_at	5360	-0.766551	0.0199504	0.0967135	1.14781	0.188524	0.378662	1	1.91436	IND
PCGF2	203793_x_at	7703	1.05801	0.0259382	0.113534	0.856335	0.0392758	0.127835	2	1.91434	IND
C12orf52	221777_at	84934	-0.63175	0.106859	0.261259	1.28255	0.0112086	0.0508365	1	1.9143	IND
WWTR1	202134_s_at	25937	1.23769	0.00607396	0.051787	-0.675711	0.103406	0.252467	4	1.9134	repr
YWHAE	210317_s_at	7531	-0.433785	0.124503	0.28415	1.47914	0.0708068	0.194401	1	1.91293	IND
SF3A2	37462_i_at	8175	0.160576	0.690007	0.813255	1.75231	0.00597732	0.031973	2	1.91289	IND
CES1	209616_s_at	1066	-1.29758	0.118905	0.276306	0.613746	0.518488	0.7068	1	1.91133	IND	CES1
LIPA	201847_at	3988	0.863193	0.0221352	0.10312	-1.04666	0.288517	0.495467	4	1.90985	repr
TMEM43	217795_s_at	79188	0.362357	0.199578	0.377813	-1.54631	0.0120954	0.0539159	4	1.90867	repr
ZNF238	212774_at	10472	0.609394	0.0399217	0.145799	-1.29669	0.138175	0.307377	4	1.90608	repr
MPI	202472_at	4351	-0.810004	0.0156314	0.0853662	1.09603	0.000595897	0.00559752	1	1.90603	IND			MPI
POLR2A	202725_at	5430	0.419406	0.262472	0.449752	1.48653	2.87637e-06	7.25174e-05	2	1.90594	IND
TRAP1	201391_at	10131	-1.00588	0.00886658	0.0629014	0.898964	0.00295998	0.0191365	1	1.90485	IND
PSAP	200866_s_at	5660	1.27332	0.000420094	0.0163618	-0.63121	0.538487	0.724507	4	1.90453	repr
RECQL	210568_s_at	5965	0.335792	0.389579	0.57566	-1.56759	1.67081e-09	1.3205e-07	4	1.90338	repr
SLC25A36	201918_at	55186	1.17219	0.00467506	0.0445267	-0.729945	0.29749	0.504911	4	1.90213	repr
RNF38	218528_s_at	152006	0.966716	0.0171487	0.0902788	-0.934859	0.0521218	0.155679	4	1.90158	repr
MRPL42	217919_s_at	28977	-0.780802	0.0100877	0.0668014	1.12053	0.105298	0.255857	1	1.90133	IND	MRPL42
CSTF1	202190_at	1477	-1.3719	0.00259349	0.0354915	0.529312	0.0514773	0.154213	1	1.90121	IND	CSTF1
RAB5A	209089_at	5868	0.7736	0.00522881	0.047379	-1.12745	0.0105286	0.0485308	4	1.90105	repr
STX1A	204729_s_at	6804	1.65696	0.0654682	0.196941	0.243195	0.765654	0.883756	2	1.90016	IND
STAM2	209649_at	10254	1.34073	0.000349276	0.0153488	-0.55823	0.0357378	0.119307	4	1.89896	repr
LMO4	209205_s_at	8543	0.890534	0.0106978	0.0689089	-1.008	0.308448	0.517363	4	1.89853	repr
THBS4	204776_at	7060	-0.209545	0.404279	0.591697	1.6885	0.100599	0.247331	1	1.89804	IND
IDH3A	202069_s_at	3419	-0.53296	0.10187	0.254427	-1.36401	0.0057156	0.0311331	3	1.89697	repr
GNA14	220108_at	9630	-1.4999	0.00473831	0.0448577	0.396988	0.390034	0.597321	1	1.89688	IND
C17orf71	218514_at	55181	-0.546066	0.033872	0.132881	1.35027	6.01613e-05	0.000910053	1	1.89634	IND
FH	203032_s_at	2271	-1.85282	0.000177231	0.0114732	0.0425429	0.836651	0.919738	5	1.89536	IND
GPR153	64942_at	387509	-0.208656	0.491424	0.666669	1.68598	5.07641e-05	0.000795266	1	1.89464	IND
GLE1	206920_s_at	2733	-1.32769	0.000232582	0.012682	0.566785	0.163855	0.344458	1	1.89447	IND
TRRAP	214908_s_at	8295	-0.647893	0.101123	0.253765	1.24647	0.0124577	0.0551465	1	1.89436	IND
ANKHD1	219081_at	54882	-0.370948	0.466216	0.646435	-1.523	0.00357933	0.0220464	3	1.89395	repr
TMPO	209753_s_at	7112	-1.61135	0.00852173	0.0615585	0.282445	0.386109	0.593538	1	1.89379	IND	TMPO
PPP1R12B	201957_at	4660	-0.471018	0.140513	0.304879	-1.42139	0.0154799	0.0644677	3	1.89241	repr
HSPA5	211936_at	3309	1.451	0.00372143	0.0409333	-0.441169	0.4035	0.609529	4	1.89217	repr
NPC1	202679_at	4864	1.0822	0.0452386	0.156445	-0.809951	0.238938	0.441083	4	1.89215	repr
HEATR2	218460_at	54919	-0.939923	0.00767288	0.0582841	0.952133	0.000930524	0.00781996	1	1.89206	IND	HEATR2
C20orf27	50314_i_at	54976	-1.4507	0.00169297	0.0288007	0.440543	0.385231	0.592547	1	1.89124	IND
BIK	213132_s_at	638	-1.03476	0.019309	0.0951548	0.855536	0.0424232	0.135016	1	1.89029	IND
PCDHGA1	209079_x_at	56114	0.711698	0.0615753	0.189697	1.17807	0.191277	0.382228	2	1.88977	IND
IFT88	204703_at	8100	-0.447369	0.0913797	0.238238	1.44212	0.00315885	0.0201994	1	1.88949	IND
RBM38	212430_at	55544	-0.404197	0.214837	0.395353	1.48429	0.0312562	0.108464	1	1.88849	IND
HLA-DPA1	211991_s_at	3113	0.0353105	0.89008	0.941618	1.85147	0.127909	0.292208	5	1.88679	IND
JMJD1A	212689_s_at	55818	0.44345	0.164183	0.334936	1.44204	0.0433789	0.136758	2	1.88549	IND
EFNB2	202668_at	1948	0.448212	0.622057	0.763088	1.4352	0.119337	0.278319	2	1.88341	IND
ORC5L	204957_at	5001	-0.622327	0.0704282	0.205046	1.26061	0.00934622	0.0445402	1	1.88294	IND
NFYA	213322_at	4800	-1.24499	0.00402407	0.0419118	0.636733	0.266504	0.471357	1	1.88172	IND	NFYA
SETDB1	203155_at	9869	-0.381425	0.126773	0.287373	1.50013	4.32997e-05	0.000695366	1	1.88156	IND
HIPK1	212291_at	204851	-0.413905	0.350736	0.539724	1.46687	0.0293103	0.103033	1	1.88077	IND	HIPK1
SND1	201622_at	27044	0.670593	0.0268049	0.115885	1.20947	0.00757193	0.0382347	2	1.88006	IND
MRPL39	218558_s_at	54148	-1.4866	0.000561941	0.0177251	0.393169	0.474421	0.66795	1	1.87977	IND	MRPL39
TTC15	203122_at	51112	-0.612331	0.0198519	0.096537	1.26742	0.00130954	0.0103304	1	1.87975	IND
FGFR1	211535_s_at	2260	0.961834	0.0429439	0.152252	-0.917151	0.123216	0.284256	4	1.87898	repr
BEX4	215440_s_at	56271	-0.0729474	0.828426	0.904978	1.80487	0.0290099	0.102257	5	1.87782	IND
PDXDC1	212053_at	23042	0.804101	0.00549253	0.048658	1.07254	0.0123005	0.0545536	2	1.87664	IND
TXNDC13	201580_s_at	56255	-0.641947	0.159983	0.330006	-1.23456	0.00406492	0.0242106	3	1.87651	repr
COQ9	212228_s_at	57017	-0.470421	0.0937147	0.242171	1.40587	0.0132279	0.0575062	1	1.87629	IND
JAG2	209784_s_at	3714	-0.668925	0.283411	0.471168	1.20553	0.00786795	0.0394182	1	1.87445	IND
DOCK9	212538_at	23348	0.238649	0.360656	0.549578	-1.63572	0.0041702	0.0247538	4	1.87437	repr
LRRC59	222231_s_at	55379	0.512247	0.144405	0.310277	-1.36141	0.0398869	0.129054	4	1.87366	repr
ABI2	211793_s_at	10152	-1.28899	0.00117639	0.0250749	0.584376	0.0534212	0.158819	1	1.87337	IND	ABI2
RGL1	209568_s_at	23179	0.29275	0.454198	0.637055	1.58058	0.0248993	0.0913146	2	1.87333	IND	RGL1
GOLGA2	204384_at	2801	1.64674	0.000134436	0.0108692	-0.225634	0.169735	0.353543	4	1.87237	repr
SLC16A1	202234_s_at	6566	0.0828527	0.795963	0.883895	-1.78733	1.17575e-05	0.000235618	5	1.87018	repr
SNRPB	208821_at	6628	-1.2266	0.00402335	0.0419118	0.643501	0.419304	0.622222	1	1.8701	IND			SNRPB
CCNE2	211814_s_at	9134	-1.60857	0.0039971	0.0419118	-0.261341	0.258731	0.462377	3	1.86991	repr
MRPS18B	208907_s_at	28973	-0.795313	0.0260996	0.113815	1.07445	0.00404186	0.0241755	1	1.86977	IND
HIG2	218507_at	29923	-1.15555	0.00286959	0.0366995	-0.714003	0.281789	0.488124	3	1.86955	repr
PSMD1	201199_s_at	5707	-0.0934235	0.738193	0.845952	1.77599	0.00159494	0.0118844	5	1.86942	IND
PIGF	205078_at	5281	-1.14891	0.00133339	0.0262247	0.719837	0.0209666	0.0801954	1	1.86874	IND
ASAH1	213702_x_at	427	0.884978	0.00555951	0.049066	-0.983654	0.157477	0.335665	4	1.86863	repr
ACP1	201629_s_at	52	-1.08681	0.00572317	0.0498531	0.781323	0.177146	0.363273	1	1.86814	IND	ACP1
DHX30	204355_at	22907	-0.789889	0.00425879	0.0424913	1.07765	0.03618	0.120383	1	1.86754	IND
SNRPD2	200826_at	6633	-0.287891	0.24996	0.43526	1.57944	0.0044414	0.025926	1	1.86733	IND
KIF18A	221258_s_at	81930	-1.398	0.0443802	0.15477	0.469196	0.0395338	0.128325	1	1.8672	IND
NUDT3	221579_s_at	11165	-0.999644	0.0200724	0.0969722	0.867259	0.0479654	0.146182	1	1.8669	IND
NPC2	200701_at	10577	1.27957	0.00118368	0.0250952	-0.586412	0.482024	0.674604	4	1.86598	repr		NPC2
VPS45	209268_at	11311	-0.64396	0.195694	0.373139	1.22147	0.0170858	0.0691893	1	1.86543	IND
PTPLA	219654_at	9200	0.064783	0.907793	0.949363	-1.79953	0.000111724	0.00148457	5	1.86431	repr
PGRMC1	201120_s_at	10857	-0.209025	0.37881	0.566444	-1.65351	0.0390482	0.127278	3	1.86254	repr
RAB40B	204547_at	10966	0.304087	0.371954	0.559761	1.55785	0.0520741	0.155603	2	1.86194	IND
TNC	201645_at	3371	0.828498	0.183658	0.358881	-1.03253	0.184826	0.373904	4	1.86103	repr		TNC
RIOK3	202129_s_at	8780	1.09578	0.00546983	0.0486118	-0.763726	0.203197	0.397355	4	1.8595	repr
MAPK8IP3	213178_s_at	23162	0.837198	0.0030733	0.037727	1.02218	0.055401	0.163119	2	1.85938	IND
PFKP	201037_at	5214	-1.70026	0.00826388	0.0607313	-0.159057	0.841832	0.922875	3	1.85932	repr	PFKP
PKMYT1	204267_x_at	9088	-1.75917	0.000309452	0.0143203	0.0999807	0.788244	0.896786	5	1.85915	IND
FLJ11506	202852_s_at	79719	1.76037	0.000666529	0.0185019	-0.0972848	0.777601	0.890186	5	1.85765	repr
MRPS33	218654_s_at	51650	-0.261479	0.35042	0.539591	1.59466	0.000880462	0.00752512	1	1.85614	IND
CUX1	214743_at	1523	1.14785	0.0121962	0.0740831	-0.707813	0.269558	0.474967	4	1.85567	repr
MRPS7	217932_at	51081	-0.847387	0.0764138	0.21474	1.00783	0.106397	0.257344	1	1.85522	IND	MRPS7
GANAB	214626_s_at	23193	0.145255	0.504062	0.675492	1.70976	8.4295e-05	0.00118114	2	1.85502	IND
PIK3C2B	204484_at	5287	-0.710407	0.13607	0.299943	1.14434	0.0784325	0.208659	1	1.85474	IND
EVL	217838_s_at	51466	-0.556181	0.177554	0.351778	1.29814	0.211539	0.408297	1	1.85432	IND
FPGS	202945_at	2356	-1.36268	0.0113299	0.0709657	0.491482	0.138128	0.30737	1	1.85417	IND
MRPS17	218982_s_at	51373	-0.471819	0.125405	0.285396	1.38078	0.00551022	0.0303743	1	1.85259	IND
OPHN1	206323_x_at	4983	0.489289	0.224367	0.405498	1.36309	0.0567764	0.166264	2	1.85238	IND
SNRPC	201342_at	6631	-0.413005	0.130896	0.293225	1.43842	0.00603905	0.0322296	1	1.85142	IND			SNRPC
GPSM2	221922_at	29899	-1.1222	0.0187767	0.0938036	0.729029	0.152568	0.328385	1	1.85123	IND
NSMCE4A	219067_s_at	54780	-1.24996	0.00186008	0.0299729	0.601102	0.259516	0.463308	1	1.85106	IND
NDEL1	208093_s_at	81565	0.69845	0.0465832	0.158907	-1.15194	0.0320003	0.110147	4	1.8504	repr
GNB2L1	200651_at	10399	-0.365245	0.111735	0.26824	1.4851	0.0205866	0.0793772	1	1.85034	IND			GNB2L1
STOM	201061_s_at	2040	0.920264	0.0293441	0.122125	-0.929433	0.263879	0.4686	4	1.8497	repr
SIAH1	202981_x_at	6477	0.466047	0.21102	0.391542	-1.38306	0.00493603	0.0281362	4	1.84911	repr
ITM2B	217731_s_at	9445	0.440404	0.0754022	0.212762	-1.40772	0.0121855	0.05418	4	1.84813	repr
PHIP	212542_s_at	55023	-0.1076	0.69253	0.814455	1.74001	0.00077516	0.00681559	1	1.84761	IND
MCRS1	202556_s_at	10445	-0.324667	0.276683	0.463978	1.52183	0.00175849	0.0128578	1	1.8465	IND			MCRS1
RFC2	1053_at	5982	-1.56476	0.000173483	0.0114732	0.28088	0.301475	0.509876	1	1.84564	IND
TRAPPC6A	204985_s_at	79090	-0.631938	0.168393	0.340367	1.21331	0.00783899	0.0393291	1	1.84525	IND
RUNX1	209360_s_at	861	-0.318294	0.236435	0.418861	-1.5238	0.0274546	0.0975632	3	1.84209	repr
IQGAP2	203474_at	10788	-0.880866	0.0840166	0.226513	0.960607	0.149761	0.324292	1	1.84147	IND
DDEF1	221039_s_at	50807	-1.25602	0.00491884	0.0459484	0.58482	0.250188	0.452979	1	1.84084	IND
FAM21B	214946_x_at	55747	0.954184	0.00410712	0.0420262	0.886625	0.00784489	0.0393307	2	1.84081	IND
TRAM1	201398_s_at	23471	1.1613	0.00946808	0.0649717	-0.678141	0.34919	0.559372	4	1.83945	repr
RPA3	209507_at	6119	-1.02028	0.00452526	0.0439103	0.819146	0.1836	0.372281	1	1.83943	IND
RAB11FIP1	219681_s_at	80223	-0.673835	0.137015	0.301269	1.16537	0.115374	0.27242	1	1.8392	IND
TBC1D25	213789_at	4943	-1.15791	0.0409946	0.148581	0.680734	0.299984	0.507965	1	1.83865	IND
NT5DC2	218051_s_at	64943	-0.957572	0.0101723	0.0671217	0.880759	0.249336	0.451901	1	1.83833	IND
MGRN1	212576_at	23295	0.792579	0.00748283	0.057713	1.0452	0.0826455	0.215867	2	1.83778	IND
C21orf33	210667_s_at	8209	-1.05247	0.0163195	0.0874933	0.781842	0.205709	0.401041	1	1.83431	IND
SMYD3	218788_s_at	64754	-0.707154	0.0238861	0.108397	-1.12631	0.0657992	0.184837	3	1.83347	repr
ETF1	201573_s_at	2107	0.411923	0.106596	0.26109	-1.42144	0.0207849	0.0798477	4	1.83337	repr
MCAM	209087_x_at	4162	0.0837999	0.861813	0.925212	-1.74954	0.0161417	0.0662433	5	1.83334	repr
MAP4K5	203553_s_at	11183	0.590112	0.0732143	0.209471	-1.2428	0.000876482	0.00750021	4	1.83292	repr
TMEM109	201361_at	79073	-0.233249	0.384198	0.570618	-1.59911	0.000584651	0.00553491	3	1.83236	repr
UBE2I	213535_s_at	7329	-0.538751	0.0528777	0.171244	1.29357	0.100954	0.247857	1	1.83232	IND
TICAM2	214658_at	353376	0.543942	0.0439618	0.154037	-1.28622	0.000162384	0.00200308	4	1.83016	repr
DCBLD2	213865_at	131566	0.77837	0.116303	0.273148	-1.05174	2.79477e-07	1.0569e-05	4	1.83011	repr
POLR1B	220113_x_at	84172	0.162919	0.632206	0.771101	1.66713	0.00443734	0.0259238	2	1.83005	IND
EFR3A	212149_at	23167	0.798244	0.0590853	0.18455	-1.02916	0.177848	0.364186	4	1.82741	repr
GABARAPL1	208868_s_at	23710	1.25888	0.0443167	0.154704	-0.567822	0.238475	0.440502	4	1.8267	repr
SEPT9	208657_s_at	10801	0.615875	0.0651232	0.196347	1.21044	0.00341995	0.0214402	2	1.82631	IND
MPPE1	209858_x_at	65258	0.179159	0.398987	0.58627	-1.64641	0.0002051	0.00240017	4	1.82557	repr
SAP30	204899_s_at	8819	-0.981452	0.0143514	0.0814754	0.843112	0.000919539	0.00774615	1	1.82456	IND
TRAF5	204352_at	7188	-0.14762	0.697008	0.817671	-1.67687	0.0220768	0.0833538	3	1.82449	repr
Magmas	218969_at	51025	-0.652324	0.0519754	0.170329	1.17187	9.92775e-06	0.000201826	1	1.82419	IND
HIST2H2BE	202708_s_at	8349	0.923113	0.108767	0.263661	0.901037	0.258357	0.462061	2	1.82415	IND
RABEP2	74694_s_at	79874	0.545185	0.179966	0.354687	1.27881	0.0221615	0.0834498	2	1.82399	IND
S100A6	217728_at	6277	0.337011	0.567331	0.723285	-1.48695	0.147659	0.321259	4	1.82396	repr		S100A6
ELOVL2	213712_at	54898	-1.59603	0.0188365	0.0940354	-0.226791	0.481365	0.674084	3	1.82283	repr
FLJ10038	205510_s_at	55056	-0.469018	0.0564677	0.178957	-1.35355	1.23089e-08	7.66201e-07	3	1.82257	repr
SLC39A7	202667_s_at	7922	1.4089	0.0295843	0.122504	-0.41351	0.175968	0.361707	4	1.82241	repr
KIAA1033	212794_s_at	23325	1.06417	0.0199359	0.0967095	-0.75781	0.350032	0.560273	4	1.82198	repr
RANBP6	213019_at	26953	0.684738	0.0426277	0.151589	1.13641	0.00312003	0.020024	2	1.82114	IND
[truncated: 5,035 more rows]

## Sheet: GS1
Gene_Symbol	affyID_hgu133a	EntrezGeneID	deltaKD	P.Value.KD	adj.P.Val.KD	deltaET	P.Value.ET	adj.P.Val.ET	quad	deltaSum	EWS-FLI1 induced or repressed	HancockUP	HancockDOWN	GangwalChIP
RND3	212724_at	390	4.82312	1.37478e-05	0.00657538	-6.71863	2.17422e-10	2.31719e-08	4	11.5418	repr
PRKCB1	207957_s_at	5579	-4.03434	0.000347599	0.0153488	7.27741	2.4428e-08	1.3424e-06	1	11.3117	IND	PRKCB1
PTX3	206157_at	5806	4.44734	4.50151e-07	0.00265296	-5.9198	8.16796e-11	1.03776e-08	4	10.3671	repr			PTX3
LOX	204298_s_at	4015	5.68551	6.95105e-05	0.00991172	-4.15261	2.61852e-08	1.40223e-06	4	9.83812	repr		LOX
NR0B1	206645_s_at	190	-3.43272	2.00835e-05	0.00762237	6.25909	6.5003e-11	8.46724e-09	1	9.69181	IND	NR0B1		NR0B1
NKX2-2	206915_at	4821	-1.99842	0.000805807	0.0206111	7.62184	2.35255e-22	4.13696e-19	1	9.62025	IND	NKX2-2
BCL11B	219528_s_at	64919	-3.63525	0.00012217	0.0108146	5.93425	1.61928e-13	5.17729e-11	1	9.5695	IND
KMO	211138_s_at	8564	-3.63767	0.0112095	0.0704626	5.80529	1.55046e-12	3.77167e-10	1	9.44297	IND	KMO
OPN3	205306_x_at	23596	-3.37612	0.0124485	0.0752902	6.06436	8.95806e-13	2.4235e-10	1	9.44048	IND
PPP1R1A	205478_at	5502	-4.64058	2.25669e-06	0.00265296	4.76416	6.9003e-07	2.18634e-05	1	9.40475	IND	PPP1R1A
TFPI2	209278_s_at	7980	3.85373	0.0226494	0.104458	-5.41785	8.12814e-06	0.000172209	4	9.27158	repr		TFPI2
ADM	202912_at	133	3.68897	8.75969e-05	0.00991172	-5.42627	2.26697e-07	8.90831e-06	4	9.11524	repr		ADM
PKP1	221854_at	5317	-2.02479	0.0192958	0.0951548	7.08	3.92321e-11	5.30689e-09	1	9.10478	IND
DAPK1	203139_at	1612	-2.32334	0.00128413	0.0257338	6.54312	6.13119e-13	1.72507e-10	1	8.86645	IND	DAPK1
CCK	205827_at	885	-4.1169	0.00200714	0.0310975	4.72963	0.000448553	0.00445638	1	8.84654	IND	CCK
TAGLN	205547_s_at	6876	4.99416	0.00226992	0.0327857	-3.79786	0.00977474	0.0459903	4	8.79202	repr
DAB2	210757_x_at	1601	3.45836	0.0226359	0.104458	-5.14463	1.71105e-05	0.00032884	4	8.603	repr
SRPX	204955_at	8406	1.86247	0.00165212	0.0284481	-6.53774	1.72215e-08	9.96363e-07	4	8.40021	repr		SRPX
GADD45B	207574_s_at	4616	2.09444	5.42358e-05	0.00991172	-6.18671	1.43069e-10	1.67724e-08	4	8.28114	repr
TRPM4	219360_s_at	54795	-3.83342	7.23637e-05	0.00991172	4.36106	1.38393e-10	1.64993e-08	1	8.19448	IND
PHLDA1	217996_at	22822	3.43638	0.00105084	0.0231752	-4.75433	3.04104e-07	1.12583e-05	4	8.19071	repr
THBS1	201109_s_at	7057	4.34289	0.00180436	0.0297967	-3.71996	0.000179727	0.0021709	4	8.06286	repr
FNDC3B	218618_s_at	64778	3.93852	2.1269e-06	0.00265296	-4.09435	1.57784e-05	0.000305745	4	8.03287	repr
DNAJC12	218976_at	56521	-2.45222	0.00252973	0.03519	5.50162	3.26496e-11	4.68689e-09	1	7.95384	IND	DNAJC12
TPM1	210987_x_at	7168	4.25924	0.00027322	0.0137606	-3.65199	0.000582183	0.00552642	4	7.91123	repr		TPM1
ADAMTS1	222162_s_at	9510	2.23055	0.00984021	0.0662989	-5.6301	1.999e-07	8.09071e-06	4	7.86066	repr
SLC24A3	219090_at	57419	-2.86213	0.00247971	0.0347425	4.95823	2.59141e-08	1.40215e-06	1	7.82036	IND	SLC24A3
CYR61	210764_s_at	3491	4.01657	6.26857e-05	0.00991172	-3.78984	0.00130503	0.0103304	4	7.80641	repr		CYR61
AKAP7	205771_s_at	9465	-3.34718	0.00016449	0.0114732	4.45334	1.0097e-15	6.45655e-13	1	7.80052	IND	AKAP7
MAFF	36711_at	23764	1.61178	0.0182538	0.0927726	-5.99209	2.9993e-08	1.55125e-06	4	7.60388	repr
CTGF	209101_at	1490	4.04819	3.0173e-06	0.00265296	-3.49021	0.00246557	0.0166918	4	7.53839	repr
ARHGAP29	203910_at	9411	4.5916	0.000299405	0.0140401	-2.9436	0.000480852	0.00471731	4	7.5352	repr		ARHGAP29
PMP22	210139_s_at	5376	3.19622	0.000416369	0.0163617	-4.33788	0.00114952	0.00934769	4	7.53411	repr		PMP22
DKK1	204602_at	22943	5.20502	0.0055576	0.049066	-2.32801	0.000591633	0.00557101	4	7.53303	repr		DKK1
NUSAP1	218039_at	51203	-2.98109	0.0056128	0.0494123	4.26578	1.50911e-05	0.000294864	1	7.24687	IND
MAPT	206401_s_at	4137	-3.03638	0.000429758	0.0163618	4.20914	1.8049e-06	4.86423e-05	1	7.24552	IND	MAPT
PTGER3	210832_x_at	5733	-3.52437	0.00193073	0.0306785	3.66144	2.8154e-09	2.06287e-07	1	7.18582	IND	PTGER3
FBLN5	203088_at	10516	1.59492	0.0103769	0.0677725	-5.55605	2.16768e-15	1.23491e-12	4	7.15096	repr
CCL2	216598_s_at	6347	1.95826	0.00198157	0.0309472	-5.17933	1.07142e-06	3.1799e-05	4	7.13759	repr		CCL2
FER1L3	201798_s_at	26509	2.25413	0.000506369	0.0170891	-4.86973	5.55151e-06	0.00012556	4	7.12386	repr		FER1L3
ATF3	202672_s_at	467	2.24953	0.00580123	0.05013	-4.86057	1.97033e-05	0.000365681	4	7.1101	repr
EPAS1	200878_at	2034	3.9814	0.000278002	0.0137606	-3.0703	0.0140484	0.0599978	4	7.05169	repr
RAMP1	204916_at	10267	-2.40742	0.0071736	0.0563789	4.64362	9.30716e-11	1.14854e-08	1	7.05104	IND
IGFBP3	210095_s_at	3486	2.17694	0.00610076	0.051827	-4.82836	0.000111304	0.00148279	4	7.0053	repr		IGFBP3	IGFBP3
RFTN1	212646_at	23180	3.12963	0.00807706	0.0600435	-3.87283	7.37131e-05	0.00106468	4	7.00246	repr
OLFM1	213131_at	10439	-1.76259	0.00637926	0.0526325	5.22501	6.64525e-05	0.000990749	1	6.9876	IND	OLFM1
AMIGO2	222108_at	347902	3.02535	0.00214123	0.0318422	-3.95827	2.0014e-07	8.09071e-06	4	6.98363	repr
CCND1	208711_s_at	595	-2.84205	0.000544574	0.0174711	4.10056	3.57849e-11	4.93552e-09	1	6.9426	IND
PHLDA2	209803_s_at	7262	1.68494	0.00812177	0.0601987	-5.25089	2.81422e-11	4.21175e-09	4	6.93583	repr
CLEC11A	205131_x_at	6320	-2.26849	0.0601781	0.186935	4.65977	2.56253e-07	9.84965e-06	1	6.92826	IND	CLEC11A
FCGRT	218831_s_at	2217	-3.4406	2.24578e-05	0.00762237	3.46293	5.53836e-07	1.81194e-05	1	6.90353	IND	FCGRT		FCGRT
SORD	201562_s_at	6652	-2.66136	7.75902e-06	0.00514564	4.22763	5.00413e-09	3.45088e-07	1	6.88899	IND	SORD
AMOTL2	203002_at	51421	2.02493	0.00222847	0.0323865	-4.75198	2.45947e-13	7.52171e-11	4	6.77692	repr
HMOX1	203665_at	3162	3.34274	0.0431699	0.152715	-3.43005	7.25398e-05	0.00105205	4	6.77278	repr
TRAM2	202369_s_at	9697	3.20453	0.00426484	0.0424913	-3.56255	3.35793e-08	1.69926e-06	4	6.76708	repr		TRAM2
NFIL3	203574_at	4783	1.64912	0.00146204	0.0272064	-5.10885	8.89194e-08	3.98436e-06	4	6.75796	repr		NFIL3
C17orf91	214696_at	84981	2.45906	7.14857e-05	0.00991172	-4.20786	2.34086e-08	1.2965e-06	4	6.66692	repr
RHOH	204951_at	399	-4.04522	0.000150235	0.0114732	2.59111	0.0109683	0.0500008	1	6.63632	IND	RHOH		RHOH
P4HA2	202733_at	8974	2.64381	0.0145686	0.081963	-3.97795	6.39489e-06	0.000142347	4	6.62176	repr		P4HA2
RCAN1	208370_s_at	1827	3.48294	0.000957338	0.0220784	-3.08877	1.32562e-06	3.79041e-05	4	6.57171	repr
C6orf145	212923_s_at	221749	2.39899	1.27601e-05	0.00657538	-4.15583	2.03035e-08	1.1611e-06	4	6.55483	repr
TNFRSF12A	218368_s_at	51330	3.42519	0.000249992	0.0131227	-3.04139	1.50767e-06	4.1923e-05	4	6.46657	repr
HBA2	217414_x_at	3040	-1.92622	0.0859542	0.22919	4.51563	0.0266405	0.0955092	1	6.44186	IND
GPNMB	201141_at	10457	2.48581	0.00293977	0.0369791	-3.95198	0.00184029	0.0132902	4	6.43779	repr
NPTXR	213040_s_at	23467	-2.06898	0.00421613	0.0422924	4.36391	8.69425e-08	3.97112e-06	1	6.43289	IND
PPP1R15A	202014_at	23645	2.38227	0.00762582	0.0581688	-4.04763	8.0403e-07	2.4805e-05	4	6.4299	repr
KIT	205051_s_at	3815	-1.86184	0.0233219	0.106355	4.51789	6.29458e-08	2.97155e-06	1	6.37973	IND
STARD13	213103_at	90627	-1.88372	0.0391254	0.144239	4.48831	4.89018e-12	9.29664e-10	1	6.37202	IND
TMEM194	212621_at	23306	-2.74021	0.000582143	0.0178795	3.62491	2.34334e-11	3.58327e-09	1	6.36511	IND
CDKN3	209714_s_at	1033	-2.87427	0.00398101	0.0419118	3.48336	0.000662025	0.00606339	1	6.35763	IND	CDKN3
MMP2	201069_at	4313	2.54273	0.000624132	0.0179924	-3.81272	0.000750447	0.00662314	4	6.35545	repr
NT5E	203939_at	4907	2.41317	0.00399732	0.0419118	-3.90825	4.87849e-14	1.71576e-11	4	6.32142	repr		NT5E
PCSK2	204870_s_at	5126	-4.12648	0.00140997	0.0268867	2.18076	0.0264588	0.0951078	1	6.30724	IND
FADS1	208963_x_at	3992	-1.60015	0.00025212	0.0131364	4.66652	2.07778e-09	1.5886e-07	1	6.26667	IND	FADS1
GAS1	204456_s_at	2619	-3.29165	0.0416179	0.149699	2.97208	0.000245553	0.00276355	1	6.26372	IND	GAS1
SERTAD2	202656_s_at	9792	2.13005	2.43481e-05	0.00762237	-4.10626	4.23536e-06	9.99715e-05	4	6.23631	repr
GYG2	210963_s_at	8908	-3.29529	0.00134499	0.0263527	2.93735	0.00030296	0.00325346	1	6.23263	IND	GYG2
FBN1	202766_s_at	2200	2.90498	0.000832935	0.0208253	-3.31476	0.000279517	0.00308169	4	6.21975	repr		FBN1
MAGED4B	221261_x_at	81557	1.35114	0.00381872	0.041452	4.85958	1.15502e-11	2.03111e-09	2	6.21073	IND
STEAP1	205542_at	26872	-3.19483	7.19068e-06	0.00514564	3.01418	7.4277e-07	2.31179e-05	1	6.20901	IND	STEAP1
FERMT2	209210_s_at	10979	2.46133	7.29377e-05	0.00991172	-3.73413	0.000333209	0.00354023	4	6.19547	repr
TCF7L2	216035_x_at	6934	2.7948	0.000132223	0.0108146	-3.38108	1.14676e-07	5.01014e-06	4	6.17588	repr
BUB1B	203755_at	701	-2.62217	0.00280241	0.0364365	3.53956	3.00402e-05	0.000514118	1	6.16173	IND
CDKN1A	202284_s_at	1026	2.25832	0.00541471	0.0483338	-3.89727	7.40036e-07	2.31179e-05	4	6.15559	repr
PNMA2	209598_at	10687	-1.46164	0.00150702	0.0275174	4.66576	0.00199211	0.0142259	1	6.1274	IND
CALD1	201617_x_at	800	2.90712	0.00246653	0.0347425	-3.20114	2.0071e-06	5.26788e-05	4	6.10826	repr
MT2A	212185_x_at	4502	2.50172	0.000126757	0.0108146	-3.57842	2.80148e-05	0.00049264	4	6.08014	repr
ABHD6	221679_s_at	57406	-2.72053	0.000155879	0.0114732	3.34119	3.81412e-07	1.33475e-05	1	6.06172	IND
RRM2	209773_s_at	6241	-2.28743	0.000377418	0.0158021	3.76199	0.00477448	0.0273483	1	6.04943	IND
SEMA3C	203789_s_at	10512	1.80875	0.0156583	0.0854463	-4.23021	3.08403e-06	7.65207e-05	4	6.03897	repr
VRK1	203856_at	7443	-2.04918	0.000317838	0.0144361	3.96127	1.64526e-08	9.80743e-07	1	6.01044	IND
KIAA0101	202503_s_at	9768	-1.31789	0.00375453	0.0409448	4.66217	0.000885134	0.0075467	1	5.98005	IND
UTS2	220784_s_at	10911	-2.19413	0.00387321	0.0417379	3.77665	0.000154631	0.00192509	1	5.97078	IND			UTS2
SMAD7	204790_at	4092	1.38094	0.00350372	0.0397657	-4.57556	2.78441e-15	1.39897e-12	4	5.95649	repr
GREM1	218468_s_at	26585	3.03725	0.0143902	0.0814977	-2.90692	4.0117e-07	1.39404e-05	4	5.94417	repr
SNAI2	213139_at	6591	3.45148	3.34462e-05	0.00891522	-2.48301	0.00119921	0.00964029	4	5.93449	repr		SNAI2
PRC1	218009_s_at	9055	-1.88778	0.00638281	0.0526325	4.03832	0.000101883	0.00138348	1	5.9261	IND	PRC1
SDC2	212158_at	6383	2.03451	0.00395413	0.0419118	-3.88486	1.76759e-06	4.80048e-05	4	5.91937	repr			SDC2
UGCG	204881_s_at	7357	2.28122	0.000900553	0.0214678	-3.62549	3.16716e-05	0.000535525	4	5.90671	repr		UGCG
S100A10	200872_at	6281	2.87201	0.000240698	0.0127298	-3.02454	0.00016552	0.00203188	4	5.89655	repr		S100A10
MT1X	208581_x_at	4501	2.66388	6.31118e-05	0.00991172	-3.22266	0.00116445	0.00944718	4	5.88654	repr
CHN2	213385_at	1124	-1.05894	0.311054	0.501825	4.81479	3.8537e-08	1.93621e-06	1	5.87373	IND
TGFBR2	208944_at	7048	1.92522	8.57221e-05	0.00991172	-3.94714	2.21609e-05	0.000406678	4	5.87236	repr			TGFBR2
TOP2A	201292_at	7153	-2.27235	0.0039431	0.0419118	3.59815	3.77484e-05	0.000626231	1	5.87049	IND	TOP2A
OLFML3	218162_at	56944	-2.73475	0.00959885	0.0654247	-3.1305	0.000205417	0.00240017	3	5.86525	repr
NAV3	204823_at	89795	2.14409	0.0665695	0.198411	-3.66695	2.12372e-06	5.53269e-05	4	5.81104	repr
NLGN4X	221933_at	57502	-1.96132	0.00270919	0.0363109	3.8436	3.3702e-11	4.74119e-09	1	5.80492	IND
FSTL1	208782_at	11167	2.87352	0.00100172	0.0225983	-2.92965	0.00863706	0.0420146	4	5.80318	repr
JAKMIP2	205888_s_at	9832	-1.5063	0.0117056	0.0723523	4.28682	1.83816e-14	7.18311e-12	1	5.79312	IND
CRIM1	202551_s_at	51232	2.94822	9.00457e-05	0.00991172	-2.83561	7.35383e-07	2.30923e-05	4	5.78383	repr
NCKAP1L	209734_at	3071	-2.07085	0.00579008	0.0501202	3.70951	5.32364e-05	0.000823	1	5.78037	IND	NCKAP1L
TUFT1	205807_s_at	7286	1.96532	0.00130751	0.0259803	-3.79856	3.30024e-10	3.26956e-08	4	5.76388	repr
NELL2	203413_at	4753	-1.6534	0.00294928	0.0369791	4.10348	0.00024238	0.002741	1	5.75688	IND	NELL2
UGDH	203343_at	7358	1.58731	0.000797623	0.0204762	-4.1605	5.38586e-13	1.57851e-10	4	5.7478	repr
NP	201695_s_at	4860	-2.05214	0.00432575	0.0429764	-3.64938	0.0001941	0.00229463	3	5.70152	repr
AKR1C2	211653_x_at	1646	1.74648	0.0932799	0.241313	-3.9542	7.32847e-05	0.00106067	4	5.70069	repr
ACTA2	200974_at	59	2.94086	0.0109861	0.0700601	-2.75244	0.0156875	0.0649593	4	5.6933	repr
GSN	200696_s_at	2934	1.9126	0.00493916	0.046016	-3.77685	0.00158339	0.0118233	4	5.68945	repr
TYMS	202589_at	7298	-2.12614	0.000422224	0.0163618	3.5601	0.00278559	0.0182268	1	5.68624	IND	TYMS
CEBPD	203973_s_at	1052	2.06008	0.00438053	0.0433981	-3.6234	0.00259078	0.0173071	4	5.68349	repr		CEBPD
GADD45A	203725_at	1647	2.02544	0.001818	0.0298084	-3.64492	5.86799e-08	2.82709e-06	4	5.67035	repr
PIM1	209193_at	5292	1.23073	0.0107111	0.0689314	-4.43468	6.29536e-06	0.000140576	4	5.66541	repr
HEG1	213069_at	57493	1.67496	0.00990188	0.0663964	-3.97257	1.28251e-07	5.5007e-06	4	5.64753	repr		HEG1
PRIM1	205053_at	5557	-3.40134	0.000115993	0.0105961	2.24532	0.0034243	0.0214484	1	5.64666	IND	PRIM1
PBK	219148_at	55872	-3.25741	0.000372486	0.0157501	2.37575	0.00551971	0.03038	1	5.63316	IND
PTRF	208789_at	284119	2.37474	0.000522599	0.0171355	-3.25002	0.00302447	0.0195175	4	5.62476	repr
PLAUR	210845_s_at	5329	1.60794	0.013032	0.0774121	-3.9994	2.1899e-09	1.65632e-07	4	5.60734	repr		PLAUR
CCNB1	214710_s_at	891	-2.69958	0.00965629	0.0655621	2.88399	0.000616426	0.00574297	1	5.58357	IND
KIF15	219306_at	56992	-3.01272	0.000505536	0.0170891	2.55332	0.000221804	0.00255766	1	5.56603	IND	KIF15
GBE1	203282_at	2632	2.21912	4.72297e-05	0.00977098	-3.3256	0.000117615	0.00154348	4	5.54471	repr
GLG1	212045_at	2734	-1.81182	0.00222605	0.0323865	3.72625	4.26842e-17	3.33601e-14	1	5.53808	IND	GLG1
GNG12	212294_at	55970	1.95986	0.00149997	0.0274955	-3.56992	2.74558e-05	0.00048402	4	5.52977	repr
ACTN2	203861_s_at	88	-1.60972	0.00119476	0.0252371	3.8646	0.000169301	0.00206747	1	5.47432	IND	ACTN2
LAMC1	200771_at	3915	1.54187	0.0366019	0.138642	-3.92369	0.000330593	0.00351799	4	5.46556	repr
FOSL1	204420_at	8061	2.39345	0.0210306	0.10002	-3.05148	2.78836e-08	1.47468e-06	4	5.44493	repr
NQO1	201467_s_at	1728	4.30183	0.00343354	0.0394633	-1.13988	0.0209038	0.0800857	4	5.4417	repr
CSPG5	39966_at	10675	-1.74639	0.000401877	0.0160614	3.69111	4.93949e-06	0.000113544	1	5.43751	IND	CSPG5
PAFAH1B3	203228_at	5050	-1.48597	0.000132083	0.0108146	3.94411	9.7445e-10	7.87849e-08	1	5.43008	IND
GCLM	203925_at	2730	2.06287	0.0193172	0.0951548	-3.36049	1.6331e-08	9.80743e-07	4	5.42336	repr
ATP1A1	220948_s_at	476	-1.3468	0.00180558	0.0297967	4.04337	1.90899e-10	2.0981e-08	1	5.39017	IND
HTRA1	201185_at	5654	1.78877	0.0620831	0.190612	-3.59882	0.013364	0.0579189	4	5.38759	repr
TSC22D3	208763_s_at	1831	2.39353	0.00861088	0.0617497	-2.99394	0.00142785	0.0109169	4	5.38748	repr
MBNL2	205018_s_at	10150	2.37741	0.00385588	0.0416625	-2.94829	1.7511e-10	1.95512e-08	4	5.32571	repr
IL13RA1	201887_at	3597	1.58835	0.00100928	0.0226091	-3.728	1.32574e-09	1.05969e-07	4	5.31634	repr
KCTD12	212188_at	115207	1.63717	0.0117441	0.0724633	-3.66815	3.04105e-07	1.12583e-05	4	5.30531	repr
PPIC	204518_s_at	5480	2.43437	0.000188869	0.0116294	-2.86547	1.4567e-05	0.000287016	4	5.29984	repr		PPIC
FHL2	202949_s_at	2274	1.94162	0.0251015	0.111116	-3.33876	0.0018236	0.0132103	4	5.28038	repr
TFPI	213258_at	7035	2.30754	0.00333892	0.0390807	-2.9707	0.000302086	0.00324904	4	5.27824	repr
RRAS2	212589_at	22800	1.34125	0.0045194	0.0439103	-3.93602	5.16977e-07	1.71529e-05	4	5.27727	repr
PRSS23	202458_at	11098	1.91725	0.00168841	0.0288007	-3.34887	0.000145233	0.00183077	4	5.26611	repr
SPRY1	212558_at	10252	1.91857	0.0115529	0.0715973	-3.33685	3.51842e-06	8.50467e-05	4	5.25542	repr		SPRY1
TPX2	210052_s_at	22974	-2.28248	0.0228988	0.105068	2.94925	0.00330164	0.02096	1	5.23172	IND	TPX2
KIF20A	218755_at	10112	-2.43549	0.0270684	0.116451	2.78746	9.36712e-05	0.00128688	1	5.22295	IND
DLC1	210762_s_at	10395	1.53681	0.00628088	0.0525319	-3.67992	8.37518e-06	0.000176708	4	5.21673	repr
CDC20	202870_s_at	991	-1.70891	0.0344221	0.134067	3.50163	0.00270525	0.0178901	1	5.21054	IND	CDC20
GINS1	206102_at	9837	-2.56738	0.00018875	0.0116294	2.63946	0.000286553	0.00313277	1	5.20684	IND
FAM114A1	213455_at	92689	1.89506	0.00616936	0.0520952	-3.31106	0.000240642	0.00273012	4	5.20612	repr
ARHGEF10	216620_s_at	9639	1.10537	0.00853022	0.0615585	-4.09956	5.53946e-08	2.70587e-06	4	5.20493	repr
FOXM1	202580_x_at	2305	-2.55744	0.0076533	0.0581982	2.64108	0.00400776	0.0240329	1	5.19853	IND	FOXM1	FOXM1
SERPINE1	202627_s_at	5054	2.19609	0.0394595	0.14489	-2.99399	0.00399151	0.0239559	4	5.19009	repr
RNF141	219104_at	50862	-2.40332	2.29416e-05	0.00762237	2.77332	3.06185e-06	7.63726e-05	1	5.17663	IND
CADPS2	219572_at	93664	-1.95193	0.000351393	0.0153488	3.22465	3.9156e-05	0.00064502	1	5.17657	IND
GRP	206326_at	2922	-2.42198	0.00356327	0.04006	2.75206	0.00141728	0.0108677	1	5.17404	IND
MLF1IP	218883_s_at	79682	-2.08472	0.000282962	0.0137606	3.08007	0.000531162	0.00511807	1	5.16479	IND
PALLD	200907_s_at	23022	2.54467	3.55242e-05	0.00892418	-2.57953	0.014974	0.0626204	4	5.1242	repr		PALLD
CSRP2	211126_s_at	1466	1.70414	0.0266667	0.115572	-3.40359	1.35684e-08	8.37195e-07	4	5.10772	repr		CSRP2
NUPR1	209230_s_at	26471	3.15735	0.00100522	0.0225983	-1.94549	0.0262501	0.0947374	4	5.10284	repr
FOXC1	213260_at	2296	2.27268	0.0252258	0.111526	-2.82991	3.58444e-07	1.27656e-05	4	5.10259	repr
KDSR	202419_at	2531	-2.33127	9.31756e-05	0.00991172	2.76905	3.4705e-06	8.41776e-05	1	5.10031	IND
MT1L	204326_x_at	4500	2.24073	0.000911697	0.0214678	-2.85217	0.0101316	0.0471335	4	5.0929	repr
LDB2	206481_s_at	9079	-2.91131	2.24475e-05	0.00762237	2.16229	0.00911284	0.0436349	1	5.0736	IND	LDB2
ITGB5	201125_s_at	3693	1.0786	0.0102482	0.0672744	-3.90925	7.86136e-06	0.000168075	4	4.98785	repr
NUAK1	204589_at	9891	2.34017	0.0006858	0.0187701	-2.64408	0.0055739	0.0306303	4	4.98425	repr
KIF4A	218355_at	24137	-2.32809	0.0105439	0.0683261	2.61327	0.000643354	0.00592324	1	4.94136	IND
CENPA	204962_s_at	1058	-2.81152	0.0022043	0.0322774	2.11612	0.00343487	0.0214826	1	4.92764	IND	CENPA
CBR3	205379_at	874	-2.43094	4.20295e-05	0.00923861	-2.48124	1.71679e-07	7.20301e-06	3	4.91218	repr
SPRY2	204011_at	10253	1.57914	0.00760856	0.0581589	-3.32639	3.10252e-07	1.14257e-05	4	4.90553	repr		SPRY2
HOOK1	219976_at	51361	-1.46989	0.00337578	0.0393134	3.43206	5.97807e-08	2.86053e-06	1	4.90195	IND	HOOK1
HSPA1A	200800_s_at	3303	2.93661	0.00181073	0.0297967	-1.95247	0.0125094	0.0553197	4	4.88907	repr
COL5A2	221730_at	1290	2.52715	0.00420411	0.0422676	-2.348	0.00839741	0.0411907	4	4.87515	repr		COL5A2
RFC4	204023_at	5984	-1.71838	0.00123765	0.0253071	3.15222	0.000276656	0.00305494	1	4.8706	IND
ARID5B	212614_at	84159	2.26383	0.00304589	0.0377197	-2.60523	0.00208383	0.014643	4	4.86906	repr
RNASEH2A	203022_at	10535	-2.60488	0.000334654	0.0149934	2.25491	2.7099e-05	0.000480137	1	4.85979	IND	RNASEH2A
DLG7	203764_at	9787	-2.61034	0.0173082	0.0904501	2.242	0.00181029	0.013141	1	4.85234	IND	DLG7
SRPX2	205499_at	27286	1.75785	0.00028562	0.0137606	-3.06514	1.05226e-11	1.94779e-09	4	4.82299	repr		SRPX2
DUSP5	209457_at	1847	2.20365	0.0717813	0.206676	-2.61714	0.00867669	0.0421199	4	4.82079	repr			DUSP5
MID1	203636_at	4281	3.09272	0.000826339	0.0208089	-1.72069	0.000546349	0.00524319	4	4.81341	repr
LYPD1	212909_at	116372	-1.72324	0.0157966	0.0859709	3.08437	5.85169e-05	0.000889002	1	4.80761	IND
SERPING1	200986_at	710	-1.02089	0.00337225	0.0393134	-3.77783	0.000118449	0.00155152	3	4.79872	repr
MRPL35	218890_x_at	51318	-2.05739	9.17666e-05	0.00991172	2.73905	0.000109551	0.00146499	1	4.79644	IND	MRPL35
FANCI	213008_at	55215	-2.2698	0.00022863	0.0126629	2.52063	0.000182474	0.00218199	1	4.79044	IND
GFPT1	202721_s_at	2673	3.44921	0.000118412	0.0106783	-1.33878	0.00312963	0.0200673	4	4.78799	repr			GFPT1
CDKN1C	213348_at	1028	1.95908	0.090719	0.237099	-2.82631	0.013052	0.0569526	4	4.78538	repr		CDKN1C
SAMD4A	212845_at	23034	1.5534	0.00752332	0.057835	-3.21894	1.19938e-05	0.000238333	4	4.77234	repr
GLB1L2	213713_s_at	89944	-2.98498	8.77846e-06	0.00514564	1.77862	0.00188574	0.0135502	1	4.7636	IND
MICA	205904_at	4276	2.20586	0.000147558	0.0114732	-2.54086	4.8438e-07	1.63804e-05	4	4.74673	repr
CTSO	203758_at	1519	1.75499	0.0015966	0.0280761	-2.98631	2.26605e-07	8.90831e-06	4	4.7413	repr
ITGB2	202803_s_at	3689	-1.77374	0.00178285	0.0295768	2.94839	0.0150399	0.0628583	1	4.72213	IND			ITGB2
MYO1B	212365_at	4430	1.09092	0.0147273	0.0823139	-3.59501	2.49859e-08	1.36241e-06	4	4.68593	repr
NNMT	202237_at	4837	1.1609	0.00208563	0.0314588	-3.49929	0.00351749	0.0218377	4	4.66019	repr
NUDT1	204766_s_at	4521	-2.56941	0.000357274	0.0154176	2.08144	0.000675114	0.00616721	1	4.65084	IND	NUDT1
ZWINT	204026_s_at	11130	-1.92524	0.00374184	0.0409333	2.72411	0.00523869	0.0293384	1	4.64935	IND
CAP2	212551_at	10486	1.87639	0.0025652	0.0353566	-2.76256	0.00953803	0.0452397	4	4.63894	repr
ZFP36L2	201368_at	678	1.48834	0.000318112	0.0144361	-3.14807	0.000709937	0.00637765	4	4.63641	repr		ZFP36L2
HIST1H2BD	209911_x_at	3017	1.34756	0.0656714	0.19707	3.28479	3.82853e-05	0.000633644	2	4.63235	IND
CAD	202715_at	790	-1.80724	8.06156e-05	0.00991172	2.81883	1.84523e-05	0.000345557	1	4.62607	IND	CAD
ALDH7A1	208950_s_at	501	-1.86649	0.00543205	0.0484272	2.75142	4.06026e-06	9.61612e-05	1	4.61791	IND
LIG1	202726_at	3978	-2.19659	0.0033886	0.0393974	2.41775	7.40812e-05	0.0010678	1	4.61434	IND
CCNB2	202705_at	9133	-2.0251	0.0031265	0.0378517	2.58696	0.00466004	0.0268458	1	4.61206	IND	CCNB2
C6orf108	204238_s_at	10591	-2.87483	0.000527464	0.0171603	1.73486	0.0246344	0.0905676	1	4.6097	IND
HMMR	207165_at	3161	-2.23765	0.0134496	0.0787714	2.36834	0.00598931	0.0320128	1	4.60599	IND
SH2B3	203320_at	10019	-2.60972	0.00187064	0.0299729	1.99531	0.00171825	0.0126557	1	4.60503	IND	SH2B3
ATAD2	218782_s_at	29028	-2.9293	0.0044725	0.0436332	1.66318	0.0106054	0.0487255	1	4.59247	IND	ATAD2
CNN3	201445_at	1266	0.989454	0.00637957	0.0526325	-3.59929	0.000265266	0.00295235	4	4.58874	repr
TLE2	40837_at	7089	-1.64843	0.00225857	0.0327018	2.90783	1.90083e-06	5.06455e-05	1	4.55627	IND
TACC3	218308_at	10460	-1.77507	0.0204434	0.0979555	2.76344	0.000638912	0.00590529	1	4.53851	IND	TACC3
KLF2	219371_s_at	10365	1.71728	0.0133997	0.0786565	-2.81399	0.000429487	0.00429731	4	4.53126	repr
POLA1	204835_at	5422	-2.84542	0.00054892	0.0174711	1.6709	0.000145042	0.00183077	1	4.51631	IND
KIAA1797	218503_at	54914	-1.13515	0.00710491	0.0560897	3.37621	5.57299e-10	4.85322e-08	1	4.51136	IND
ASPH	210896_s_at	444	1.85886	0.00247386	0.0347425	-2.63746	1.34862e-06	3.80896e-05	4	4.49632	repr
ATXN1	203232_s_at	6310	2.51149	0.000100047	0.00991172	-1.97909	0.0253434	0.0924133	4	4.49058	repr
LPP	202822_at	4026	2.11818	0.000845088	0.0208253	-2.36538	0.000777639	0.00682885	4	4.48356	repr
IFRD1	202146_at	3475	1.31348	0.0089401	0.0632643	-3.14125	1.21453e-07	5.27344e-06	4	4.45473	repr
PRKDC	208694_at	5591	-1.0496	0.00455992	0.043998	3.38999	1.76234e-07	7.29378e-06	1	4.4396	IND
MELK	204825_at	9833	-1.53508	0.00946669	0.0649717	2.87091	9.3097e-05	0.00128167	1	4.40599	IND
ELL2	214446_at	22936	2.2826	0.00442135	0.0435052	-2.12116	3.20118e-06	7.79138e-05	4	4.40377	repr
BAG3	217911_s_at	9531	1.39098	0.00434296	0.0430865	-3.01049	3.00095e-05	0.000514118	4	4.40147	repr
KIF11	204444_at	3832	-2.04394	0.00392818	0.0419118	2.3567	0.000498333	0.00486168	1	4.40064	IND
DTL	218585_s_at	51514	-2.1719	6.30685e-05	0.00991172	2.21754	0.000799105	0.00697382	1	4.38944	IND
ITGB3BP	205176_s_at	23421	-2.42389	7.77974e-05	0.00991172	1.96492	0.00432321	0.0253412	1	4.38881	IND	ITGB3BP
DNAJC9	213092_x_at	23234	-2.11858	0.000554582	0.0175718	2.25563	4.00074e-05	0.000655971	1	4.37421	IND
NUDT11	219855_at	55190	-1.16467	0.00989545	0.0663964	3.20779	2.75783e-07	1.04857e-05	1	4.37247	IND	NUDT11
SGK1	201739_at	6446	1.52519	0.0230054	0.105351	-2.82795	0.00214491	0.0149527	4	4.35314	repr
PARVA	217890_s_at	55742	1.46995	0.00121949	0.0253071	-2.8792	2.86425e-05	0.000501172	4	4.34915	repr
MCM3	201555_at	4172	-2.06455	5.12239e-05	0.00991172	2.27045	0.00419886	0.0248382	1	4.335	IND
LIMA1	217892_s_at	51474	2.04181	0.000394846	0.016054	-2.28809	0.003337	0.0211083	4	4.3299	repr
DRAM	218627_at	55332	2.21362	0.00414033	0.0420393	-2.11522	1.34828e-06	3.80896e-05	4	4.32884	repr
HOXD13	207398_at	3239	-2.48868	0.00216486	0.031932	1.82709	0.00277535	0.0181767	1	4.31577	IND
NPY1R	205440_s_at	4886	-1.66507	0.00989599	0.0663964	2.64768	0.000269219	0.00299161	1	4.31275	IND	NPY1R
BACH1	204194_at	571	1.4523	0.000595131	0.0178795	-2.86009	3.29948e-10	3.26956e-08	4	4.31238	repr
ZDHHC3	218078_s_at	51304	-2.08313	0.00111971	0.024234	2.22301	2.30299e-05	0.000418585	1	4.30614	IND	ZDHHC3
KNTC1	206316_s_at	9735	-2.18242	2.92259e-05	0.00822299	2.11955	3.46667e-05	0.000581971	1	4.30197	IND
TMEM106C	201764_at	79022	-1.62202	0.00410823	0.0420262	2.67292	0.00011186	0.00148457	1	4.29495	IND
EZH2	203358_s_at	2146	-1.46848	0.000195091	0.0116294	2.82346	5.79424e-05	0.000886015	1	4.29194	IND	EZH2
MYOM2	205826_at	9172	-1.88004	0.0100675	0.0668014	2.39662	0.00742696	0.0376378	1	4.27666	IND	MYOM2
RANBP5	211952_at	3843	-2.16459	9.68766e-05	0.00991172	2.10434	7.80295e-06	0.000167847	1	4.26893	IND			RANBP5
SNX7	205573_s_at	51375	-1.39751	0.00654569	0.0535377	-2.86044	0.000229412	0.00261537	3	4.25795	repr
CD59	200984_s_at	966	1.29576	0.000391034	0.016054	-2.96149	0.000858369	0.00739017	4	4.25725	repr
LARP6	218651_s_at	55323	1.84886	0.00526233	0.0474182	-2.40766	0.00370249	0.0226071	4	4.25652	repr
CBLB	209682_at	868	1.00837	0.00503234	0.0467602	-3.23118	4.70275e-07	1.60578e-05	4	4.23955	repr
DDB2	203409_at	1643	-2.06729	0.000454802	0.01679	2.16288	0.00046345	0.0045657	1	4.23017	IND
CYP26B1	219825_at	56603	-1.88302	0.0451481	0.156285	2.34314	0.00471564	0.027096	1	4.22616	IND
PEA15	200788_s_at	8682	2.38255	0.000648307	0.0183879	-1.83778	0.0272812	0.0970152	4	4.22033	repr		PEA15
STEAP3	218424_s_at	55240	-1.31435	0.00351488	0.0398127	2.90397	0.000319577	0.00342146	1	4.21831	IND
PTPN13	204201_s_at	5783	-1.42415	0.000591134	0.0178795	2.77709	4.78829e-09	3.36809e-07	1	4.20124	IND	PTPN13
TTK	204822_at	7272	-1.83983	0.022573	0.104254	2.35948	0.00227028	0.0156254	1	4.19931	IND
INPP1	202794_at	3628	1.40865	0.00415373	0.0420393	-2.7793	0.000717283	0.00641905	4	4.18794	repr
TMEM97	212281_s_at	27346	-1.09967	0.00500413	0.0465596	3.07484	0.00146263	0.0111223	1	4.1745	IND	TMEM97
SALL2	213283_s_at	6297	-1.16214	0.0204166	0.0979555	3.01018	6.19927e-07	2.00026e-05	1	4.17232	IND	SALL2
FNBP1	213940_s_at	23048	-1.69905	0.00278596	0.0364365	2.45817	0.000508562	0.00494092	1	4.15722	IND	FNBP1
JAG1	216268_s_at	182	2.44132	0.00929818	0.0645641	-1.68945	0.0199312	0.0778002	4	4.13077	repr
HELLS	220085_at	3070	-2.32908	0.00204666	0.0312961	1.79846	0.000904974	0.00766617	1	4.12754	IND	HELLS
UPP1	203234_at	7378	1.74293	0.037958	0.141869	-2.37443	0.00194299	0.0139317	4	4.11737	repr
PLCXD1	218951_s_at	55344	-1.72747	0.00171319	0.0288007	2.38434	5.13557e-08	2.52612e-06	1	4.11181	IND
CYLD	221903_s_at	1540	1.40039	0.00694446	0.0556036	-2.70448	0.00135598	0.0106096	4	4.10488	repr
GSTM4	204149_s_at	2948	-2.81114	0.00272048	0.0363109	1.2822	0.0141165	0.060179	1	4.09333	IND	GSTM4
WNT5A	205990_s_at	7474	-1.73296	0.0272588	0.116914	2.35319	7.46796e-05	0.00107203	1	4.08616	IND
SLC26A2	205097_at	1836	-2.06798	0.00673602	0.0545866	2.01186	0.0198345	0.0775436	1	4.07984	IND
NEU1	208926_at	4758	2.28272	7.50495e-05	0.00991172	-1.78817	0.000210675	0.00245345	4	4.07089	repr
TROAP	204649_at	10024	-2.99929	0.00156236	0.027962	1.06991	0.0156013	0.0648578	1	4.0692	IND		TROAP
UBE2C	202954_at	11065	-1.51847	0.0192978	0.0951548	2.54498	0.000330178	0.00351799	1	4.06345	IND
GALNT1	201724_s_at	2589	2.18009	0.000182683	0.0114732	-1.88149	0.00538918	0.0299191	4	4.06158	repr		GALNT1
MT1H	206461_x_at	4496	1.06468	0.00445726	0.0436332	-2.99551	0.000323084	0.00345376	4	4.06019	repr
WASF1	204165_at	8936	-1.01474	0.0040589	0.0419118	3.0437	0.000136355	0.00174386	1	4.05843	IND	WASF1
CACNB2	213714_at	783	-1.67385	0.0104475	0.0680441	2.38094	0.000764656	0.00674009	1	4.05479	IND	CACNB2		CACNB2
H2AFY2	218445_at	55506	-1.25551	0.0134908	0.0788447	2.79895	1.91858e-12	4.22871e-10	1	4.05446	IND	H2AFY2
CDC25B	201853_s_at	994	-1.72366	0.00170758	0.0288007	2.32015	0.0130998	0.0570905	1	4.0438	IND		CDC25B
MT1E	212859_x_at	4493	1.10891	0.0182194	0.0926647	-2.91814	0.0086388	0.0420146	4	4.02705	repr
CCDC109B	218802_at	55013	-1.76713	0.0102624	0.0672744	-2.25873	0.0125383	0.0553336	3	4.02586	repr
MT1F	217165_x_at	4494	1.11403	0.00996486	0.0665649	-2.90905	0.00571482	0.0311331	4	4.02308	repr
LAMB2	216264_s_at	3913	1.1956	0.00405383	0.0419118	-2.81478	0.000205196	0.00240017	4	4.01038	repr
PDSS1	220865_s_at	23590	-2.53912	0.00127249	0.0257338	1.43928	0.00664186	0.0346066	1	3.9784	IND	PDSS1
FAM3C	201889_at	10447	1.38331	0.00269359	0.0363109	-2.58912	0.000190745	0.00225875	4	3.97243	repr		FAM3C
NME4	212739_s_at	4833	-1.29649	0.000726716	0.0193626	2.67538	8.61438e-05	0.00119987	1	3.97187	IND
IGSF3	202421_at	3321	-1.79107	0.00706108	0.055932	2.177	0.000701775	0.00633358	1	3.96807	IND
RCOR1	212612_at	23186	-1.11356	0.00402543	0.0419118	2.84795	2.92734e-08	1.52526e-06	1	3.96151	IND	RCOR1
NCAPG	218663_at	64151	-2.44693	0.0012281	0.0253071	1.51371	0.00340084	0.0213585	1	3.96064	IND
CKAP2	218252_at	26586	-1.658	0.00697057	0.0556538	2.2892	0.000259316	0.00289988	1	3.9472	IND
HOXB13	209844_at	10481	-1.4481	0.177054	0.351211	2.48453	0.000968328	0.00807974	1	3.93263	IND
SLC5A6	204087_s_at	8884	-2.29951	0.0011571	0.0247388	1.63103	0.000829339	0.00717536	1	3.93054	IND	SLC5A6
QSOX1	201482_at	5768	2.32612	2.58355e-05	0.00762237	-1.60326	0.00596744	0.0319444	4	3.92937	repr
HJURP	218726_at	55355	-2.5697	0.021497	0.101415	1.34774	0.0145342	0.0612534	1	3.91744	IND
VCL	200931_s_at	7414	1.71047	0.00999462	0.066574	-2.20207	0.00981797	0.046132	4	3.91254	repr
SLC5A3	212944_at	6526	1.69614	0.00248599	0.0347425	-2.21301	0.00170549	0.0125862	4	3.90915	repr
NEUROD6	220045_at	63974	-2.08347	0.0880595	0.232424	1.81935	0.0193225	0.0760574	1	3.90282	IND			NEUROD6
XBP1	200670_at	7494	1.5116	0.00950319	0.0650247	-2.38987	0.000721192	0.00643677	4	3.90147	repr		XBP1
RIT1	209882_at	6016	2.79651	1.48035e-05	0.00657538	-1.08871	0.00352855	0.0218505	4	3.88521	repr
SLC30A1	212907_at	7779	1.54905	0.0778077	0.216348	-2.32596	0.000570316	0.00542108	4	3.87501	repr
RBMS1	209868_s_at	5937	1.76257	0.00242785	0.0345	-2.10847	0.0237761	0.0880679	4	3.87104	repr		RBMS1
MEIS1	204069_at	4211	-2.00247	0.000451068	0.01679	1.85932	0.0166545	0.0678724	1	3.86179	IND	MEIS1
PTPN12	202006_at	5782	1.16857	0.0104844	0.0680956	-2.66935	2.85011e-06	7.2114e-05	4	3.83792	repr		PTPN12
MT1P2	211456_x_at	645745	1.25596	0.000579621	0.0178795	-2.58087	0.000991411	0.00822363	4	3.83683	repr
PGCP	208454_s_at	10404	0.977053	0.00453211	0.0439103	-2.85914	5.12576e-10	4.56387e-08	4	3.83619	repr
NDUFA7	202785_at	4701	-1.09193	0.00732749	0.0570782	2.74335	8.20452e-05	0.00115653	1	3.83528	IND
KIF14	206364_at	9928	-1.96419	0.00826389	0.0607313	1.86739	0.000495592	0.00484166	1	3.83158	IND	KIF14
ALG6	219649_at	29929	-2.39221	0.000214627	0.0122335	1.42945	0.00504838	0.0285912	1	3.82167	IND
CYB5A	207843_x_at	1528	-1.16153	0.00571733	0.0498531	-2.6499	0.00270354	0.0178901	3	3.81143	repr
GNAI1	209576_at	2770	2.06105	0.000180679	0.0114732	-1.7444	0.000365404	0.00379408	4	3.80545	repr
HERPUD1	217168_s_at	9709	1.71737	0.00375206	0.0409448	-2.06164	0.000401903	0.00408821	4	3.77901	repr
NRP1	210510_s_at	8829	1.2852	0.00348398	0.0397657	-2.48341	8.81196e-08	3.98436e-06	4	3.76861	repr
RMI1	218979_at	80010	-1.61928	0.00516519	0.0471985	2.14008	1.67583e-07	7.14412e-06	1	3.75936	IND	RMI1
COQ2	213379_at	27235	-1.56217	0.00011245	0.0104075	2.19084	6.63449e-05	0.000990749	1	3.75302	IND
GPSN2	208336_s_at	9524	-1.65939	0.000702496	0.0190052	2.05857	0.00381808	0.0231195	1	3.71797	IND
SH3BP5	201811_x_at	9467	1.41285	0.00415178	0.0420393	-2.30461	0.00548163	0.0302889	4	3.71745	repr
AURKA	208079_s_at	6790	-1.76134	0.00819008	0.0605773	1.95273	0.00637879	0.0334839	1	3.71407	IND	AURKA
PFAS	213302_at	5198	-2.09095	0.00018252	0.0114732	1.60382	0.00267327	0.0177562	1	3.69478	IND	PFAS
ZYX	215706_x_at	7791	2.05816	0.00105761	0.0231752	1.63089	0.0203343	0.0788052	2	3.68904	IND
CENPE	205046_at	1062	-2.14117	0.025743	0.113173	1.54635	0.00938808	0.0446365	1	3.68752	IND
SMA5	215043_s_at	11042	-0.824403	0.0185158	0.0932063	2.85449	8.98854e-10	7.35179e-08	1	3.67889	IND
LTA4H	208771_s_at	4048	-1.37287	0.00271885	0.0363109	2.30534	0.00849045	0.041589	1	3.67821	IND
RRBP1	201206_s_at	6238	2.34532	0.000126435	0.0108146	-1.32823	0.022888	0.0853627	4	3.67355	repr
CELSR2	204029_at	1952	-0.77986	0.0190402	0.0945827	2.88065	0.000344871	0.00363876	1	3.66051	IND	CELSR2
ATP2B1	215716_s_at	490	2.26135	0.000191716	0.0116294	-1.37963	0.00529784	0.0296224	4	3.64097	repr
IL6ST	212195_at	3572	1.49047	0.00278239	0.0364365	-2.13854	0.00519523	0.0291959	4	3.62901	repr		IL6ST
KLF7	204334_at	8609	0.978774	0.00194963	0.0307483	-2.64809	4.25243e-06	0.000100039	4	3.62686	repr
POLD3	212836_at	10714	-2.39858	0.000490394	0.0170891	1.20337	0.00798972	0.0398297	1	3.60195	IND	POLD3
MRP63	204386_s_at	78988	-1.46505	0.00342999	0.0394633	2.13644	3.22221e-05	0.000543525	1	3.60148	IND
GRK5	204395_s_at	2869	-2.03623	0.00158804	0.0280041	1.55988	0.00200136	0.0142516	1	3.59611	IND	GRK5		GRK5
USP13	205356_at	8975	-1.65505	0.000601101	0.0178795	1.93797	0.00373109	0.0227422	1	3.59302	IND
C8orf70	205308_at	51101	0.985531	0.002786	0.0364365	-2.59095	2.10542e-08	1.19432e-06	4	3.57648	repr
ITM2A	202747_s_at	9452	-1.30555	0.0180237	0.0922029	2.26556	0.00574279	0.0311801	1	3.57111	IND
IDH2	210046_s_at	3418	-0.927499	0.0034583	0.0396183	2.63746	0.00417684	0.0247722	1	3.56496	IND
PHKA2	209439_s_at	5256	-0.984832	0.0105491	0.0683261	2.52433	4.89825e-09	3.41132e-07	1	3.50916	IND
GPX7	213170_at	2882	-1.09694	0.00780304	0.0587132	2.40529	8.63629e-06	0.000179844	1	3.50224	IND
NCAPG2	219588_s_at	54892	-2.21962	0.00142527	0.0268867	1.28043	0.0118892	0.0532667	1	3.50005	IND
MRPL22	218339_at	29093	-1.06251	0.00114739	0.0246299	2.42628	6.00624e-05	0.000910053	1	3.48879	IND
DDAH2	214909_s_at	23564	1.81408	0.00248937	0.0347425	-1.67213	0.000591613	0.00557101	4	3.4862	repr
SQSTM1	201471_s_at	8878	1.72636	0.00269744	0.0363109	-1.75359	7.89871e-05	0.0011179	4	3.47995	repr
CENPF	209172_s_at	1063	-1.68915	0.0134076	0.0786565	1.77925	0.000104361	0.00140898	1	3.4684	IND
NEK2	204641_at	4751	-1.67626	0.00922233	0.0642524	1.78785	0.014169	0.0603663	1	3.46411	IND
LEPROT	202377_at	54741	1.12235	0.0014164	0.0268867	-2.33939	0.00402169	0.0240959	4	3.46175	repr
FAM111A	218248_at	63901	-1.55352	0.100977	0.253577	1.9032	0.00765415	0.0385392	1	3.45672	IND
LOC26010	222154_s_at	26010	1.1431	0.00369512	0.040867	-2.31176	0.0099692	0.0466581	4	3.45486	repr
MTHFD1	202309_at	4522	-1.75253	4.11372e-05	0.00923861	1.69848	0.0035237	0.0218505	1	3.45101	IND	MTHFD1
RUVBL1	201614_s_at	8607	-1.59787	0.000180568	0.0114732	1.85264	3.08955e-06	7.65207e-05	1	3.45051	IND
TIMP2	203167_at	7077	1.25292	0.00985657	0.0663456	-2.19388	0.00385861	0.0233174	4	3.4468	repr
IVNS1ABP	201362_at	10625	-0.980766	0.00218317	0.0321264	2.45806	0.000548538	0.0052567	1	3.43882	IND	IVNS1ABP
CHSY1	203044_at	22856	1.49656	0.0015817	0.0280041	-1.94208	0.00551431	0.0303743	4	3.43864	repr
PDLIM2	219165_at	64236	0.988203	0.0138069	0.0794746	-2.44275	0.00131017	0.0103304	4	3.43095	repr
KIF18B	222039_at	146909	-2.04091	0.00298555	0.0371688	1.3816	0.0129755	0.0567597	1	3.42251	IND
SUCLG2	215772_x_at	8801	-1.23894	0.0114477	0.0711966	-2.17409	0.0014067	0.0108257	3	3.41303	repr
PRR3	204795_at	80742	-1.56262	0.00147046	0.027219	1.8375	6.64819e-05	0.000990749	1	3.40012	IND			PRR3
GSTM2	204418_x_at	2946	-1.63764	0.0110079	0.0701355	1.75962	0.00463217	0.026751	1	3.39726	IND	GSTM2
MSH6	211450_s_at	2956	-1.77774	0.000518676	0.0171355	1.61613	0.017248	0.0696857	1	3.39387	IND	MSH6
PXMP2	219076_s_at	5827	-1.58481	0.000828332	0.0208089	1.80465	0.00144065	0.0109908	1	3.38946	IND	PXMP2
GSTM1	204550_x_at	2944	-1.74035	0.00317257	0.038212	1.61609	0.00357055	0.0220309	1	3.35644	IND	GSTM1
LOC389168	215780_s_at	389168	-1.0151	0.00230544	0.0331625	2.34111	0.00256841	0.0172248	1	3.35621	IND
GP1BB	206655_s_at	2812	-0.874591	0.0111801	0.0704626	2.46606	0.00104987	0.00864728	1	3.34065	IND
AGBL5	218480_at	60509	-1.09455	0.00186785	0.0299729	2.24537	0.000453465	0.0044925	1	3.33992	IND
NID1	202007_at	4811	1.1282	0.0104686	0.0680809	-2.20857	0.0125514	0.0553522	4	3.33677	repr
RAD54B	219494_at	25788	-1.9337	0.00861154	0.0617497	1.40158	0.000980653	0.00815356	1	3.33529	IND	RAD54B
DNAJB4	203810_at	11080	2.20969	0.00098855	0.0225031	-1.11873	0.00319147	0.0203613	4	3.32841	repr
DHRS7	210788_s_at	51635	1.31682	0.0192995	0.0951548	-2.01153	0.00670643	0.0348397	4	3.32835	repr
NDST4	208334_at	64579	-1.75388	0.00780935	0.0587132	1.56445	0.0013916	0.0107448	1	3.31832	IND
GGH	203560_at	8836	-0.866489	0.00893126	0.0632643	2.44886	4.16311e-05	0.000674731	1	3.31535	IND
HSD17B8	213540_at	7923	-1.83582	0.0125334	0.075609	1.46987	0.0111333	0.0506234	1	3.3057	IND
COG7	213190_at	91949	-1.45804	0.00320192	0.0382558	1.84612	6.65343e-06	0.000147171	1	3.30417	IND
ST5	202440_s_at	6764	1.71882	0.00458718	0.0442003	-1.57772	0.00413492	0.0245858	4	3.29654	repr
CTPS	202613_at	1503	-1.95279	7.44982e-05	0.00991172	1.33939	0.0238975	0.0884558	1	3.29218	IND	CTPS
LSM4	202736_s_at	25804	-1.12364	0.0010529	0.0231752	2.16221	0.00422217	0.0248942	1	3.28585	IND	LSM4
HRSP12	203790_s_at	10247	-1.41333	0.00213535	0.0318422	1.87013	0.0134098	0.0580319	1	3.28346	IND	HRSP12
ZDHHC4	220261_s_at	55146	-1.1202	0.0052725	0.0474255	2.16048	0.000422161	0.00425427	1	3.28068	IND
TOB1	202704_at	10140	0.68451	0.016042	0.0865111	-2.58259	0.00117577	0.0095281	4	3.2671	repr
CARHSP1	218384_at	23589	-1.36634	0.00130124	0.0259803	1.8889	6.93305e-05	0.00101658	1	3.25525	IND
RNF219	219303_at	79596	-1.68254	0.00256698	0.0353566	1.54174	0.00177446	0.0129165	1	3.22428	IND
OSTM1	218196_at	28962	1.06275	0.00289729	0.0368502	-2.1518	2.68033e-06	6.80629e-05	4	3.21455	repr
TRIO	209012_at	7204	1.12517	0.00860576	0.0617497	-2.08872	6.35162e-09	4.29589e-07	4	3.2139	repr		TRIO
ADAM9	202381_at	8754	0.998288	0.00307319	0.037727	-2.21516	0.000715375	0.00641012	4	3.21345	repr
BMPR2	209920_at	659	1.25878	0.00548665	0.048658	-1.95008	5.18624e-06	0.000117677	4	3.20886	repr
SLC25A11	209003_at	8402	-1.72104	0.000928011	0.0215433	1.48522	0.0227586	0.0851023	1	3.20626	IND
ISYNA1	222240_s_at	51477	-1.57011	0.0173969	0.0906972	1.63069	0.0203042	0.0787947	1	3.20079	IND
UNG	202330_s_at	7374	-1.51434	0.00104209	0.0231231	1.68241	7.58929e-05	0.00108689	1	3.19675	IND
WIPI1	203827_at	55062	1.09663	0.00808377	0.0600435	-2.0947	9.19994e-06	0.000189772	4	3.19133	repr
COX7C	213846_at	1350	-0.757643	0.0192207	0.0951548	2.4325	5.32114e-05	0.000823	1	3.19014	IND
ECT2	219787_s_at	1894	-1.62899	0.00597623	0.051208	1.55752	0.00062015	0.0057548	1	3.18651	IND	ECT2
ANXA2P2	208816_x_at	304	1.35134	0.00362676	0.0405574	-1.83392	0.000117281	0.00154348	4	3.18526	repr
MRS2	218536_at	57380	-1.49497	0.000671024	0.0185097	1.68747	1.16967e-05	0.00023507	1	3.18244	IND
WDR12	218512_at	55759	-1.24172	0.0120899	0.073692	1.92687	0.000701879	0.00633358	1	3.16859	IND	WDR12
AHCY	200903_s_at	191	-1.06752	0.00128224	0.0257338	2.09894	0.0178058	0.0714565	1	3.16646	IND	AHCY
TAF9B	221618_s_at	51616	-2.09292	0.000353498	0.0153488	1.06229	0.00569683	0.0311114	1	3.15521	IND
NUP85	218014_at	79902	-1.45537	0.00163215	0.0283182	1.69594	0.00578283	0.0312896	1	3.1513	IND	NUP85
PLAU	211668_s_at	5328	0.834176	0.0171893	0.0902986	-2.31521	2.60118e-06	6.62925e-05	4	3.14939	repr		PLAU
EGFL7	218825_at	51162	-1.4204	0.000410214	0.0162104	1.72413	0.0026971	0.0178807	1	3.14453	IND
DSTN	201022_s_at	11034	1.31021	0.00446789	0.0436332	-1.82726	0.00634435	0.0334028	4	3.13747	repr
MDK	209035_at	4192	1.28572	0.00334469	0.0390807	1.85101	0.00634913	0.033403	2	3.13672	IND		MDK
TH1L	220607_x_at	51497	-0.642783	0.0207352	0.0990165	2.48923	0.00109143	0.00897911	1	3.13201	IND	TH1L
TSPYL2	218012_at	64061	1.19447	0.00278171	0.0364365	1.93716	0.0147413	0.0619416	2	3.13163	IND
ITGAV	202351_at	3685	1.5328	0.00324285	0.0385307	-1.59698	0.0208244	0.0798738	4	3.12977	repr
RHOQ	212117_at	23433	1.54601	9.50799e-05	0.00991172	-1.57386	0.00531225	0.0296324	4	3.11987	repr
CDC7	204510_at	8317	-1.41074	0.00298551	0.0371688	1.70683	0.00316319	0.0202088	1	3.11756	IND	CDC7
TMEM9B	218065_s_at	56674	1.44174	0.00205398	0.03134	-1.67014	0.000340613	0.00360282	4	3.11188	repr
CREB3L2	212345_s_at	64764	1.34783	0.00130697	0.0259803	-1.76007	0.0241833	0.0892942	4	3.10789	repr		CREB3L2
MRPL23	213897_s_at	6150	-1.23397	0.00292984	0.0369328	1.87173	0.00258138	0.0172763	1	3.1057	IND
SSRP1	200956_s_at	6749	-1.10046	0.000915603	0.0214678	1.99471	0.00207808	0.0146318	1	3.09517	IND	SSRP1
LSM8	219119_at	51691	-1.00688	0.0136297	0.0792979	2.08258	0.000613589	0.00572412	1	3.08947	IND
RCN1	201063_at	5954	1.29763	0.00123005	0.0253071	-1.78772	0.00801423	0.0398953	4	3.08535	repr
XAGE1D	220057_at	9503	-1.94764	0.000227253	0.0126629	1.13627	0.0275208	0.0977168	1	3.08391	IND
FAM64A	221591_s_at	54478	-1.9387	0.0228854	0.105068	1.14418	0.0236429	0.0877132	1	3.08288	IND
TIMELESS	203046_s_at	8914	-1.68732	0.00286789	0.0366995	1.39529	0.00128173	0.0101987	1	3.08261	IND	TIMELESS
GEMIN6	219539_at	79833	-1.853	0.000128127	0.0108146	1.22777	0.0118839	0.0532667	1	3.08077	IND
PAICS	201014_s_at	10606	-1.18975	0.00395227	0.0419118	1.88747	0.0140262	0.0599395	1	3.07721	IND	PAICS
PIP4K2A	212829_at	5305	0.842696	0.00834246	0.0609355	-2.23425	0.0279065	0.0989385	4	3.07695	repr
MAD2L1	203362_s_at	4085	-1.47722	0.00896112	0.0633016	1.59159	0.0154134	0.0642288	1	3.06881	IND
SCLY	221575_at	51540	-2.00066	8.72101e-05	0.00991172	1.06273	0.0025909	0.0173071	1	3.06339	IND			SCLY
NOL5A	200875_s_at	10528	-1.18318	0.000477955	0.0170891	1.86967	0.00258132	0.0172763	1	3.05285	IND	NOL5A
THTPA	218540_at	79178	-1.17421	0.0117324	0.0724545	1.8768	7.06906e-05	0.00103161	1	3.05101	IND
CHAC1	219270_at	79094	1.62474	0.108778	0.263661	-1.42018	0.00215205	0.0149783	4	3.04492	repr
STXBP2	209367_at	6813	-1.47876	0.000735288	0.0194437	1.56482	0.0220577	0.0833263	1	3.04358	IND
KIAA0391	202713_s_at	9692	-1.43528	0.00370734	0.0408737	1.60493	0.00826622	0.0407746	1	3.0402	IND
LAMP2	203041_s_at	3920	1.41935	0.00279225	0.0364365	-1.61611	0.0149201	0.062469	4	3.03545	repr
BGLAP	206956_at	632	-1.299	0.00442305	0.0435052	1.73568	2.9953e-05	0.000514118	1	3.03469	IND	BGLAP
FJX1	219522_at	24147	1.97251	0.0149164	0.0830661	-1.06037	0.00995566	0.0466581	4	3.03288	repr
DDX12	213378_s_at	440081	-1.74206	0.00012363	0.0108146	1.29013	0.0261962	0.0945916	1	3.03219	IND
ZNF292	212368_at	23036	0.707585	0.00936344	0.0647956	2.32034	6.55687e-05	0.000984652	2	3.02793	IND
TCF7L1	221016_s_at	83439	1.29113	0.00886999	0.0629014	-1.734	0.000220029	0.00254553	4	3.02513	repr
GEMIN4	205527_s_at	50628	-1.75299	0.000208615	0.0120282	1.26585	0.0140954	0.0601254	1	3.01885	IND
ATIC	208758_at	471	-1.07035	0.00394027	0.0419118	1.89361	0.0259455	0.0940115	1	2.96396	IND
SEC23A	204344_s_at	10484	1.44587	0.00131832	0.0261213	-1.51346	0.000678262	0.00618793	4	2.95933	repr		SEC23A
SH3GLB1	209090_s_at	51100	1.24655	0.00202726	0.031203	-1.70705	0.0144145	0.0610802	4	2.9536	repr		SH3GLB1
GRINA	212090_at	2907	0.890831	0.0052397	0.047379	2.05697	0.000544655	0.00524091	2	2.94781	IND
RAD51AP1	204146_at	10635	-1.72485	0.000489573	0.0170891	1.21173	0.0100428	0.0468755	1	2.93658	IND	RAD51AP1
THYN1	218491_s_at	29087	-1.7764	0.000591144	0.0178795	1.15535	0.0222543	0.0837543	1	2.93175	IND			THYN1
GOLT1B	218193_s_at	51026	1.3832	0.00322833	0.0384232	-1.54525	1.23217e-06	3.61128e-05	4	2.92845	repr		GOLT1B
MLLT3	204918_s_at	4300	-1.65468	0.00760384	0.0581589	1.25864	0.00446252	0.0260276	1	2.91332	IND
RRAGC	218088_s_at	64121	1.29047	0.000392683	0.016054	-1.61402	0.0128702	0.0564396	4	2.90449	repr
ADCK2	221893_s_at	90956	-1.08535	0.011418	0.0711966	1.8139	1.54399e-06	4.27575e-05	1	2.89925	IND
TBCD	211052_s_at	6904	-1.42535	0.00122286	0.0253071	1.4726	0.000810013	0.0070492	1	2.89794	IND
STCH	202558_s_at	6782	1.28992	0.00863829	0.0617497	-1.60781	4.53466e-08	2.26218e-06	4	2.89773	repr		STCH
DEAF1	209407_s_at	10522	-1.18266	0.00182986	0.0298637	1.71353	0.00240337	0.0163494	1	2.89619	IND
HYOU1	200825_s_at	10525	1.35133	0.00506573	0.0468847	1.54448	0.0203469	0.0788105	2	2.89582	IND
PSRC1	201896_s_at	84722	-1.44194	0.0509733	0.168029	1.44994	0.0127897	0.0561914	1	2.89188	IND	PSRC1
LOC643246	208785_s_at	643246	1.54249	0.000537471	0.0173421	-1.34098	0.0114692	0.0517805	4	2.88348	repr
ANGEL2	221826_at	90806	-1.5454	0.000658094	0.0184424	-1.33133	4.77727e-06	0.000110537	3	2.87673	repr
MT1G	204745_x_at	4495	0.988026	0.00209949	0.0315552	-1.88424	0.0164301	0.0671134	4	2.87226	repr
HMGB1	200679_x_at	3146	-1.28382	0.00368585	0.0408287	1.58279	0.00310171	0.0199428	1	2.86661	IND
DNAJC16	212908_at	23341	1.15476	0.0186354	0.0933628	1.70922	0.000140798	0.0017836	2	2.86399	IND
CLEC3B	212627_s_at	7123	-1.08038	0.00321827	0.0383683	1.77938	0.000238221	0.00270702	1	2.85976	IND
NCAPD3	212789_at	23310	-1.21365	0.00373885	0.0409333	1.63924	0.00575271	0.0311801	1	2.85289	IND
KIAA0913	212359_s_at	23053	1.15843	0.0201917	0.0973463	1.68863	0.00015551	0.00193262	2	2.84706	IND
STAM	203544_s_at	8027	1.04529	0.0027641	0.0364365	-1.7998	0.000413407	0.00419053	4	2.84509	repr
PDE9A	205593_s_at	5152	-1.0356	0.0136745	0.0794274	1.80646	0.000168576	0.00206219	1	2.84205	IND
EIF2AK3	218696_at	9451	1.17628	0.00297306	0.0371447	-1.66565	0.00017428	0.00211796	4	2.84193	repr
AKAP8L	218064_s_at	26993	0.993293	0.00211968	0.0317907	1.84833	0.000153496	0.00191435	2	2.84163	IND	AKAP8L
ARHGAP4	204425_at	393	-0.93506	0.0195069	0.0955443	1.893	0.00313618	0.0200831	1	2.82806	IND
PARP1	208644_at	142	-0.811849	0.0183001	0.0928228	2.0118	5.03443e-05	0.000792218	1	2.82365	IND			PARP1
C14orf169	219526_at	79697	-1.31787	0.000718431	0.0192262	1.50226	0.00028104	0.00309143	1	2.82014	IND
VGLL4	214004_s_at	9686	1.50804	0.000494862	0.0170891	1.30081	0.00468871	0.0269668	2	2.80885	IND
IL1RAP	205227_at	3556	-1.58162	0.00396878	0.0419118	1.22382	9.39845e-05	0.00128867	1	2.80544	IND	IL1RAP
RBMS3	206767_at	27303	0.981806	0.0176836	0.0912591	-1.81626	6.96269e-06	0.000152572	4	2.79807	repr
CREB3L1	213059_at	90993	1.13693	0.0035385	0.0399515	-1.65887	0.00223463	0.0154404	4	2.7958	repr
C1orf103	220235_s_at	55791	1.3713	0.00312057	0.037845	1.41955	0.00230189	0.0158275	2	2.79085	IND
POU3F2	207084_at	5454	-1.50409	0.0146756	0.0822884	1.27875	0.00709208	0.0363383	1	2.78284	IND
CAPRIN1	200722_s_at	4076	-0.915877	0.0094862	0.0649717	1.85749	0.00839287	0.0411907	1	2.77337	IND
NUP205	212247_at	23165	-1.32354	0.00100224	0.0225983	1.44591	0.00143689	0.010974	1	2.76945	IND	NUP205
MANBA	203778_at	4126	1.1082	0.00958471	0.0654247	-1.65377	0.000204702	0.00240017	4	2.76197	repr		MANBA
CCDC90A	220094_s_at	63933	-0.937061	0.00350508	0.0397657	1.82143	0.0070562	0.0362023	1	2.75849	IND
SLC23A2	209236_at	9962	-1.10961	0.0192313	0.0951548	1.64245	0.0141943	0.0604376	1	2.75205	IND
DNAJB1	200666_s_at	3337	0.969081	0.0209142	0.0996011	-1.76358	0.0101157	0.0471215	4	2.73266	repr
PGF	209652_s_at	5228	1.547	0.00525491	0.0474182	-1.17156	0.00871193	0.0422328	4	2.71856	repr		PGF
MRC2	37408_at	9902	0.758194	0.0138005	0.0794746	-1.95546	0.00165857	0.0123063	4	2.71366	repr
C11orf51	204218_at	25906	-1.1383	0.0108825	0.0696522	1.57287	9.47205e-05	0.00129372	1	2.71117	IND
CNOT7	218250_s_at	29883	-0.834093	0.00411296	0.0420262	1.87124	0.00643592	0.0337083	1	2.70533	IND
PCCB	212694_s_at	5096	-1.19109	0.000718864	0.0192262	1.5096	0.0108079	0.0495261	1	2.70068	IND
QTRT1	221270_s_at	81890	-1.19157	0.00123214	0.0253071	1.50635	0.00202936	0.0143751	1	2.69792	IND
TSC22D2	204094_s_at	9819	1.36215	0.0017266	0.0288478	-1.33532	0.0130177	0.0568381	4	2.69748	repr
COASY	201913_s_at	80347	-0.934663	0.00356953	0.04006	1.74633	4.25115e-05	0.000687415	1	2.68099	IND
CLIP1	201975_at	6249	1.14121	0.0119565	0.0730053	-1.53121	2.665e-05	0.000474572	4	2.67242	repr
FASTKD1	219002_at	79675	-0.754473	0.0162158	0.0871366	1.90952	0.000287747	0.00313277	1	2.66399	IND
POLR3K	218866_s_at	51728	-0.9696	0.00505328	0.0468732	1.68894	0.00135533	0.0106096	1	2.65854	IND
MRPS34	218112_at	65993	-1.20934	0.000523197	0.0171355	1.44419	0.000567482	0.00540877	1	2.65353	IND
DIMT1L	210802_s_at	27292	-1.57143	0.00146875	0.027219	-1.07511	0.00221156	0.0153111	3	2.64654	repr	DIMT1L
TGS1	219231_at	96764	-1.55186	0.00142957	0.0268867	1.09369	0.00833223	0.0409852	1	2.64555	IND
FOSL2	218880_at	2355	1.04521	0.00241211	0.0343458	-1.59955	0.0115378	0.0519569	4	2.64476	repr		FOSL2
LMNB1	203276_at	4001	-1.63855	0.00023941	0.0127298	1.00476	0.0220075	0.0832263	1	2.64331	IND	LMNB1
NFYC	211251_x_at	4802	-1.1772	0.00678965	0.0549579	1.46571	0.000254077	0.00284582	1	2.64292	IND
TSTA3	201644_at	7264	-1.0945	0.00118448	0.0250952	1.54783	2.53194e-07	9.78555e-06	1	2.64232	IND
RBM14	204178_s_at	10432	-1.52485	0.00201923	0.031203	1.10114	0.00630064	0.0332473	1	2.62599	IND
RHBDF1	218686_s_at	64285	0.742276	0.0203915	0.0979071	-1.87809	4.07256e-05	0.00066337	4	2.62036	repr
EXOSC5	218481_at	56915	-1.45213	0.0110372	0.0702275	1.1662	0.00153103	0.0115332	1	2.61833	IND
GCDH	208369_s_at	2639	-1.4172	0.000845701	0.0208253	1.19524	0.0156903	0.0649593	1	2.61244	IND
NUP37	218622_at	79023	-1.22737	0.0187411	0.0937147	1.37588	0.0205339	0.0792731	1	2.60325	IND	NUP37
MSH2	209421_at	4436	-1.18797	0.000502725	0.0170891	1.41006	0.0137035	0.058965	1	2.59803	IND
RAB1A	207791_s_at	5861	0.858367	0.00508444	0.0469413	-1.73891	0.000484336	0.00474488	4	2.59728	repr
ATP5D	213041_s_at	513	-1.33831	0.00172237	0.0288455	1.25623	0.0265616	0.095275	1	2.59454	IND
DCLRE1A	209804_at	9937	-1.85151	0.0135263	0.0789578	0.733888	0.0212744	0.0810639	1	2.5854	IND	DCLRE1A
CDCA4	218399_s_at	55038	-1.20065	0.00609657	0.051827	1.37989	0.00621046	0.0328949	1	2.58054	IND
ZWILCH	218349_s_at	55055	-1.01012	0.0084187	0.0611116	1.56673	0.0102419	0.0475206	1	2.57684	IND
PA2G4	208676_s_at	5036	-1.21837	0.000430329	0.0163618	1.35763	0.00141987	0.0108677	1	2.576	IND	PA2G4
C16orf58	217891_at	64755	-0.670986	0.016912	0.0897129	1.90455	0.000146816	0.00184742	1	2.57553	IND
DNMBP	212838_at	23268	1.16055	0.0170975	0.0901529	-1.40816	0.00369645	0.0225898	4	2.56871	repr
FUZ	221187_s_at	80199	-1.72027	0.000569056	0.0178694	0.848019	0.0101973	0.0473765	1	2.56829	IND
CLPP	202799_at	8192	-0.94043	0.00356307	0.04006	1.61475	0.0055899	0.0306943	1	2.55518	IND
DBI	209389_x_at	1622	-0.891504	0.0202936	0.0975717	1.65985	0.0223112	0.0838785	1	2.55135	IND
DGAT1	203669_s_at	8694	-1.3586	0.00505782	0.0468732	1.15367	0.0178966	0.0716882	1	2.51226	IND
SEC24A	212900_at	10802	1.54823	0.0006096	0.0178795	-0.955107	0.0156451	0.0648813	4	2.50333	repr
FARSA	202159_at	2193	-1.24274	0.00066811	0.0185019	1.24268	0.027952	0.09905	1	2.48541	IND
RNF111	218761_at	54778	1.35359	0.000179019	0.0114732	1.12116	0.0156324	0.0648813	2	2.47474	IND
FBXO46	205310_at	23403	-0.694179	0.00916847	0.0641682	1.77933	3.19822e-08	1.63017e-06	1	2.47351	IND
EFNB1	202711_at	1947	-1.39031	0.00414205	0.0420393	1.08039	0.000974437	0.00812108	1	2.4707	IND	EFNB1
DVL2	57532_at	1856	-0.828567	0.0185808	0.0932222	1.6387	2.95343e-05	0.000511686	1	2.46727	IND
ADRA1D	210960_at	146	-1.43528	0.0144331	0.0814977	1.02806	0.00250717	0.0169409	1	2.46334	IND
GTSE1	204318_s_at	51512	-1.50466	0.0830815	0.225114	0.956228	0.0243047	0.0895542	1	2.46089	IND	GTSE1
MPZL1	210594_x_at	9019	1.49481	0.0537189	0.173012	-0.962194	1.71467e-07	7.20301e-06	4	2.45701	repr
PDCD2	213581_at	5134	-1.11492	0.00620852	0.052363	1.33435	0.00163506	0.0121704	1	2.44928	IND
PMVK	203515_s_at	10654	-1.19948	0.0113683	0.0711429	1.24754	0.00344504	0.0214826	1	2.44702	IND
KATNB1	203162_s_at	10300	-1.32301	0.000509405	0.0170891	1.11899	0.00379754	0.0230474	1	2.442	IND			KATNB1
LIMS1	212687_at	3987	0.702611	0.00936187	0.0647956	-1.73171	0.00421655	0.0248819	4	2.43433	repr
SUPT16H	217815_at	11198	-0.779399	0.00636153	0.0526325	1.64335	0.00336679	0.0212585	1	2.42274	IND			SUPT16H
OSGEPL1	220631_at	64172	-1.25102	0.00392182	0.0419118	1.16675	0.00116096	0.00942981	1	2.41777	IND
MRPS28	219819_s_at	28957	-1.015	0.00367189	0.0408027	1.40092	0.0133237	0.0577799	1	2.41592	IND
GNPAT	201956_s_at	8443	-0.893437	0.00424692	0.042433	1.50808	0.00687413	0.0354491	1	2.40152	IND	GNPAT
APEX1	210027_s_at	328	-0.769128	0.00911473	0.064049	1.61354	0.0049703	0.02824	1	2.38267	IND	APEX1
GALNT10	207357_s_at	55568	1.06075	0.0132649	0.0780799	-1.32047	6.36757e-05	0.00095909	4	2.38122	repr
SF3B3	200687_s_at	23450	-1.03934	0.00291805	0.0368502	1.33801	0.00091313	0.00771063	1	2.37735	IND
RECQL4	213520_at	9401	-1.36033	0.0170338	0.0901529	1.01404	0.0112225	0.0508626	1	2.37437	IND
MKKS	218138_at	8195	-1.19957	0.00160881	0.0281502	1.16681	0.00980303	0.0460926	1	2.36638	IND	MKKS
C11orf67	221599_at	28971	1.15506	0.0159322	0.0861392	-1.20498	0.000882858	0.00753643	4	2.36004	repr
PALB2	219530_at	79728	-0.797316	0.0110659	0.0702508	1.5505	5.74092e-10	4.92459e-08	1	2.34781	IND
C12orf44	218214_at	60673	0.801297	0.01496	0.0830661	-1.54629	0.00341229	0.0214113	4	2.34758	repr
SLC39A4	219215_s_at	55630	-1.39751	0.000401243	0.0160614	0.946324	0.0174607	0.0704233	1	2.34383	IND	SLC39A4
TMEM127	219460_s_at	55654	1.1402	0.00791283	0.0592746	-1.18861	0.0216182	0.0821516	4	2.3288	repr
ARL1	201659_s_at	400	1.03341	0.00512419	0.0471158	-1.28066	0.00637325	0.0334839	4	2.31408	repr
MRPS16	218046_s_at	51021	-1.09462	0.017407	0.0906972	1.21031	0.019838	0.0775436	1	2.30493	IND
LRP1	200785_s_at	4035	1.0527	0.0135947	0.0792079	-1.23948	0.00465172	0.0268199	4	2.29218	repr
TLN2	212703_at	83660	1.0503	0.0175767	0.0909794	-1.23393	0.0211727	0.0807641	4	2.28423	repr		TLN2
CSNK1D	208774_at	1453	0.713997	0.0121467	0.0739097	1.56809	0.00554591	0.0305003	2	2.28209	IND
MRPL48	218281_at	51642	-1.23895	0.000908548	0.0214678	1.04069	0.00586531	0.0315995	1	2.27964	IND
C7orf44	209445_x_at	55744	-1.10685	0.0119423	0.0729821	1.17187	0.000167266	0.00204974	1	2.27872	IND
FLJ14213	219383_at	79899	-1.45636	0.00410946	0.0420262	0.815051	0.00693762	0.0357242	1	2.27141	IND	FLJ14213
LARS	217810_x_at	51520	-0.969715	0.0175047	0.0909794	1.29738	0.000162585	0.00200308	1	2.26709	IND
TIMM13	218188_s_at	26517	-0.856029	0.00420438	0.0422676	1.40919	0.0200717	0.078175	1	2.26522	IND
RAP2C	218669_at	57826	1.01378	0.0169111	0.0897129	-1.25113	0.00895445	0.043023	4	2.2649	repr
MRPS31	212604_at	10240	-0.670391	0.0126452	0.0759575	1.59081	0.00645393	0.0337775	1	2.2612	IND	MRPS31		MRPS31
STX10	212625_at	8677	-0.994776	0.0028267	0.036585	1.26304	0.00332215	0.0210522	1	2.25781	IND
WDR67	214061_at	93594	-0.990694	0.0042258	0.0422924	1.26453	0.00129771	0.0103026	1	2.25522	IND
CBX5	209715_at	23468	-1.12282	0.000865125	0.0209838	1.12861	0.0161647	0.066299	1	2.25143	IND	CBX5
HBP1	209102_s_at	26959	1.17908	0.0190198	0.0945827	-1.06523	0.0275341	0.0977168	4	2.24431	repr
TMCO6	221096_s_at	55374	-0.956993	0.00846822	0.0613445	1.27863	0.00256502	0.0172248	1	2.23562	IND
COX8A	201119_s_at	1351	-0.836098	0.0194914	0.095542	1.3879	0.00632615	0.0333319	1	2.224	IND
KIF2A	213598_at	3796	-1.07068	0.00402566	0.0419118	1.13937	0.0145734	0.0613459	1	2.21004	IND
RTN4	211509_s_at	57142	0.802985	0.0106831	0.0689089	-1.40044	0.0130039	0.0568347	4	2.20343	repr
OAZ2	201365_at	4947	0.729458	0.019001	0.0945827	-1.46465	0.000649011	0.00596751	4	2.19411	repr
NARG2	218713_at	79664	-0.903479	0.0024787	0.0347425	1.28099	0.000135371	0.00173502	1	2.18447	IND
RPP25	219143_s_at	54913	-1.33407	0.007013	0.0558025	0.842762	0.0189063	0.0745444	1	2.17683	IND
RPL10A	200036_s_at	4736	-0.67501	0.0195543	0.0955836	1.49407	0.0148788	0.0623332	1	2.16908	IND			RPL10A
C17orf90	50374_at	339229	-0.821825	0.00640509	0.0526325	1.34494	7.16607e-05	0.00104145	1	2.16676	IND
IRF3	202621_at	3661	-0.80732	0.0163731	0.0875808	1.35647	0.0129164	0.0566068	1	2.16379	IND
CPSF3L	217994_x_at	54973	-0.916472	0.0072608	0.0567472	1.24653	0.00215611	0.0149862	1	2.163	IND
MPHOSPH9	215731_s_at	10198	-1.13866	0.0118964	0.0727645	1.01408	0.00374016	0.0227777	1	2.15274	IND
MCCC2	209623_at	64087	-0.903328	0.00603518	0.0515813	1.24388	0.00907966	0.0435057	1	2.14721	IND
DNAJB6	209015_s_at	10049	1.19616	0.153848	0.323035	-0.943653	0.00506203	0.0286454	4	2.13981	repr			DNAJB6
NDUFS2	201966_at	4720	-0.835548	0.00406367	0.0419118	1.2963	0.00959628	0.0454547	1	2.13185	IND	NDUFS2
CXorf40A	213315_x_at	91966	0.946672	0.00198425	0.0309472	-1.18074	0.0134148	0.0580319	4	2.12741	repr
PAQR4	212858_at	124222	-0.718503	0.0152015	0.0841647	1.39518	9.22945e-07	2.79827e-05	1	2.11368	IND
JRK	216309_x_at	8629	0.838208	0.0178195	0.0914909	1.27503	0.000424956	0.00427631	2	2.11323	IND
SOX12	204432_at	6666	-1.06017	0.00169039	0.0288007	1.04896	0.000419439	0.00423899	1	2.10913	IND
SFRS9	201698_s_at	8683	-0.702024	0.00959156	0.0654247	1.4057	0.00617803	0.0327972	1	2.10773	IND
FKBP3	218003_s_at	2287	-0.834905	0.015285	0.0844318	1.26568	0.00051317	0.00497881	1	2.10058	IND
SECISBP2	218265_at	79048	-0.671617	0.0187456	0.0937147	1.40444	0.000176497	0.00214048	1	2.07605	IND			SECISBP2
FIG4	203656_at	9896	-0.890807	0.0156	0.0853527	1.17355	0.0167391	0.0680889	1	2.06436	IND
MDFI	205375_at	4188	-1.03357	0.00789574	0.0592097	1.02646	0.000420696	0.00424559	1	2.06003	IND	MDFI
RAD51C	209849_s_at	5889	-0.770293	0.0160066	0.0864086	1.28646	0.00223041	0.0154264	1	2.05676	IND	RAD51C
SIRT1	218878_s_at	23411	-0.84885	0.00853278	0.0615585	-1.20489	0.0137931	0.0591591	3	2.05374	repr
RAI16	218337_at	64760	1.03491	0.00181305	0.0297967	0.993653	0.0145254	0.0612534	2	2.02856	IND
PPOX	204788_s_at	5498	-0.852421	0.012677	0.0760189	1.17592	0.025065	0.0917312	1	2.02834	IND
ATXN10	208832_at	25814	-1.16136	0.0106264	0.0686372	0.8667	0.0230574	0.0858125	1	2.02806	IND
BTBD2	207722_s_at	55643	-0.89935	0.00345075	0.0395964	1.12857	0.00137582	0.0107083	1	2.02792	IND
EFS	204400_at	10278	-0.826548	0.00999092	0.066574	1.19116	0.00876518	0.0424032	1	2.01771	IND
TRAF3	221571_at	7187	-0.851715	0.0200439	0.0969662	1.16546	0.00349869	0.0217401	1	2.01717	IND
COX15	219547_at	1355	-0.820809	0.0186	0.0932521	1.18517	0.000811086	0.0070492	1	2.00598	IND
NXT1	218708_at	29107	-0.681556	0.015698	0.0855306	-1.32347	0.0187145	0.0740787	3	2.00503	repr
ARHGEF1	203055_s_at	9138	-0.670733	0.0100662	0.0668014	1.32877	0.00337612	0.0212602	1	1.99951	IND
U1SNRNPBP	205300_s_at	11066	-0.714744	0.0185671	0.09322	1.26245	7.85441e-05	0.00111387	1	1.9772	IND
SAFB	201747_s_at	6294	-1.36402	0.00100558	0.0225983	0.602898	0.0228851	0.0853627	1	1.96692	IND
CYHR1	213072_at	50626	1.00733	0.00157405	0.0280041	0.95178	0.00272075	0.0179192	2	1.95911	IND
C8orf32	219060_at	55093	-1.25268	0.00562661	0.0494666	0.70361	0.00851783	0.0416651	1	1.95629	IND
NOLA2	209104_s_at	55651	-0.710234	0.00878747	0.0625067	1.23651	0.00238959	0.0162872	1	1.94674	IND
MYBBP1A	219098_at	10514	-1.09368	0.0185036	0.0932063	0.851784	0.00879634	0.0424989	1	1.94546	IND
ACTR1B	202135_s_at	10120	-1.10304	0.000881319	0.0213031	0.840072	0.0227663	0.0851023	1	1.94311	IND
FAM18B	218446_s_at	51030	0.790026	0.013793	0.0794746	-1.13631	0.000955333	0.00799978	4	1.92633	repr
PGM3	210041_s_at	5238	1.0552	0.0104042	0.0678882	-0.864892	0.00681296	0.035237	4	1.92009	repr
ILK	201234_at	3611	0.638879	0.0171727	0.0902788	-1.27898	0.0101714	0.0472875	4	1.91785	repr
CBR4	213626_at	84869	-0.839186	0.0195294	0.0955443	1.07642	0.00961436	0.0455097	1	1.91561	IND
MPI	202472_at	4351	-0.810004	0.0156314	0.0853662	1.09603	0.000595897	0.00559752	1	1.90603	IND			MPI
TRAP1	201391_at	10131	-1.00588	0.00886658	0.0629014	0.898964	0.00295998	0.0191365	1	1.90485	IND
RAB5A	209089_at	5868	0.7736	0.00522881	0.047379	-1.12745	0.0105286	0.0485308	4	1.90105	repr
HEATR2	218460_at	54919	-0.939923	0.00767288	0.0582841	0.952133	0.000930524	0.00781996	1	1.89206	IND	HEATR2
TTC15	203122_at	51112	-0.612331	0.0198519	0.096537	1.26742	0.00130954	0.0103304	1	1.87975	IND
PDXDC1	212053_at	23042	0.804101	0.00549253	0.048658	1.07254	0.0123005	0.0545536	2	1.87664	IND
PIGF	205078_at	5281	-1.14891	0.00133339	0.0262247	0.719837	0.0209666	0.0801954	1	1.86874	IND
FAM21B	214946_x_at	55747	0.954184	0.00410712	0.0420262	0.886625	0.00784489	0.0393307	2	1.84081	IND
SAP30	204899_s_at	8819	-0.981452	0.0143514	0.0814754	0.843112	0.000919539	0.00774615	1	1.82456	IND
ARL2BP	202092_s_at	23568	0.908262	0.00827997	0.0607313	-0.907037	0.00338261	0.0212727	4	1.8153	repr
STIL	205339_at	6491	-0.955552	0.0126175	0.075891	0.845346	0.0172086	0.0696062	1	1.8009	IND
ATXN2	202622_s_at	6311	0.714485	0.0103671	0.0677713	1.07748	0.0106407	0.0488556	2	1.79196	IND
ZNF211	205437_at	10520	0.861184	0.00744636	0.0575729	0.913106	0.0159176	0.0655912	2	1.77429	IND
UTP14A	221514_at	10813	-0.642243	0.0125499	0.0756437	1.12385	0.000705471	0.00635376	1	1.7661	IND
EIF2B3	218488_at	8891	-0.814663	0.00681639	0.0549932	-0.923844	0.000288603	0.00313277	3	1.73851	repr
SEC22B	209207_s_at	9554	0.848322	0.014957	0.0830661	-0.804079	0.000430163	0.00429796	4	1.6524	repr
NDUFB1	206790_s_at	4707	-0.73783	0.0100203	0.0666437	0.914183	0.0182813	0.0727985	1	1.65201	IND
CEP192	218827_s_at	55125	-0.700082	0.0114417	0.0711966	0.941884	0.0264916	0.0951553	1	1.64197	IND
C2orf43	222192_s_at	60526	-0.778787	0.0165641	0.0884674	0.828953	0.0178746	0.0716446	1	1.60774	IND
THOP1	203235_at	7064	-0.910445	0.00938679	0.0647956	0.686751	0.0248106	0.0911321	1	1.5972	IND
KLHL9	213233_s_at	55958	0.616333	0.0200136	0.0968862	0.910444	0.0102356	0.0475206	2	1.52678	IND
C2orf44	219120_at	80304	-0.980842	0.00550412	0.0486993	0.46048	0.0161801	0.0663235	1	1.44132	IND
TAF5L	213654_at	27097	-0.938127	0.00992321	0.0664053	-0.457701	0.0159148	0.0655912	3	1.39583	repr
RNGTT	204207_s_at	8732	-0.993246	0.0193534	0.0951548	-0.355415	0.0154092	0.0642288	3	1.34866	repr
ARFIP1	214483_s_at	27236	0.618625	0.0209929	0.099908	-0.577849	0.022404	0.0840927	4	1.19647	repr
C19orf2	211563_s_at	8725	-0.612152	0.0179159	0.0917846	0.510683	0.0112595	0.0509977	1	1.12284	IND

## Sheet: GS2
Gene_Symbol	affyID_hgu133a	EntrezGeneID	deltaKD	P.Value.KD	adj.P.Val.KD	deltaET	P.Value.ET	adj.P.Val.ET	quad	deltaSum	EWS-FLI1 induced or repressed	HancockUP	HancockDOWN	GangwalChIP
RND3	212724_at	390	4.82312	1.37478e-05	0.00657538	-6.71863	2.17422e-10	2.31719e-08	4	11.5418	repr
PRKCB1	207957_s_at	5579	-4.03434	0.000347599	0.0153488	7.27741	2.4428e-08	1.3424e-06	1	11.3117	IND	PRKCB1
PTX3	206157_at	5806	4.44734	4.50151e-07	0.00265296	-5.9198	8.16796e-11	1.03776e-08	4	10.3671	repr			PTX3
LOX	204298_s_at	4015	5.68551	6.95105e-05	0.00991172	-4.15261	2.61852e-08	1.40223e-06	4	9.83812	repr		LOX
NR0B1	206645_s_at	190	-3.43272	2.00835e-05	0.00762237	6.25909	6.5003e-11	8.46724e-09	1	9.69181	IND	NR0B1		NR0B1
NKX2-2	206915_at	4821	-1.99842	0.000805807	0.0206111	7.62184	2.35255e-22	4.13696e-19	1	9.62025	IND	NKX2-2
BCL11B	219528_s_at	64919	-3.63525	0.00012217	0.0108146	5.93425	1.61928e-13	5.17729e-11	1	9.5695	IND
KMO	211138_s_at	8564	-3.63767	0.0112095	0.0704626	5.80529	1.55046e-12	3.77167e-10	1	9.44297	IND	KMO
OPN3	205306_x_at	23596	-3.37612	0.0124485	0.0752902	6.06436	8.95806e-13	2.4235e-10	1	9.44048	IND
PPP1R1A	205478_at	5502	-4.64058	2.25669e-06	0.00265296	4.76416	6.9003e-07	2.18634e-05	1	9.40475	IND	PPP1R1A
TFPI2	209278_s_at	7980	3.85373	0.0226494	0.104458	-5.41785	8.12814e-06	0.000172209	4	9.27158	repr		TFPI2
ADM	202912_at	133	3.68897	8.75969e-05	0.00991172	-5.42627	2.26697e-07	8.90831e-06	4	9.11524	repr		ADM
PKP1	221854_at	5317	-2.02479	0.0192958	0.0951548	7.08	3.92321e-11	5.30689e-09	1	9.10478	IND
DAPK1	203139_at	1612	-2.32334	0.00128413	0.0257338	6.54312	6.13119e-13	1.72507e-10	1	8.86645	IND	DAPK1
CCK	205827_at	885	-4.1169	0.00200714	0.0310975	4.72963	0.000448553	0.00445638	1	8.84654	IND	CCK
TAGLN	205547_s_at	6876	4.99416	0.00226992	0.0327857	-3.79786	0.00977474	0.0459903	4	8.79202	repr
DAB2	210757_x_at	1601	3.45836	0.0226359	0.104458	-5.14463	1.71105e-05	0.00032884	4	8.603	repr
SRPX	204955_at	8406	1.86247	0.00165212	0.0284481	-6.53774	1.72215e-08	9.96363e-07	4	8.40021	repr		SRPX
GADD45B	207574_s_at	4616	2.09444	5.42358e-05	0.00991172	-6.18671	1.43069e-10	1.67724e-08	4	8.28114	repr
TRPM4	219360_s_at	54795	-3.83342	7.23637e-05	0.00991172	4.36106	1.38393e-10	1.64993e-08	1	8.19448	IND
PHLDA1	217996_at	22822	3.43638	0.00105084	0.0231752	-4.75433	3.04104e-07	1.12583e-05	4	8.19071	repr
THBS1	201109_s_at	7057	4.34289	0.00180436	0.0297967	-3.71996	0.000179727	0.0021709	4	8.06286	repr
FNDC3B	218618_s_at	64778	3.93852	2.1269e-06	0.00265296	-4.09435	1.57784e-05	0.000305745	4	8.03287	repr
DNAJC12	218976_at	56521	-2.45222	0.00252973	0.03519	5.50162	3.26496e-11	4.68689e-09	1	7.95384	IND	DNAJC12
CFD	205382_s_at	1675	-0.703922	0.0264738	0.11502	-7.21944	8.23643e-09	5.36435e-07	3	7.92336	repr
TPM1	210987_x_at	7168	4.25924	0.00027322	0.0137606	-3.65199	0.000582183	0.00552642	4	7.91123	repr		TPM1
ADAMTS1	222162_s_at	9510	2.23055	0.00984021	0.0662989	-5.6301	1.999e-07	8.09071e-06	4	7.86066	repr
SLC24A3	219090_at	57419	-2.86213	0.00247971	0.0347425	4.95823	2.59141e-08	1.40215e-06	1	7.82036	IND	SLC24A3
CYR61	210764_s_at	3491	4.01657	6.26857e-05	0.00991172	-3.78984	0.00130503	0.0103304	4	7.80641	repr		CYR61
AKAP7	205771_s_at	9465	-3.34718	0.00016449	0.0114732	4.45334	1.0097e-15	6.45655e-13	1	7.80052	IND	AKAP7
MAFF	36711_at	23764	1.61178	0.0182538	0.0927726	-5.99209	2.9993e-08	1.55125e-06	4	7.60388	repr
CTGF	209101_at	1490	4.04819	3.0173e-06	0.00265296	-3.49021	0.00246557	0.0166918	4	7.53839	repr
ARHGAP29	203910_at	9411	4.5916	0.000299405	0.0140401	-2.9436	0.000480852	0.00471731	4	7.5352	repr		ARHGAP29
PMP22	210139_s_at	5376	3.19622	0.000416369	0.0163617	-4.33788	0.00114952	0.00934769	4	7.53411	repr		PMP22
DKK1	204602_at	22943	5.20502	0.0055576	0.049066	-2.32801	0.000591633	0.00557101	4	7.53303	repr		DKK1
NUSAP1	218039_at	51203	-2.98109	0.0056128	0.0494123	4.26578	1.50911e-05	0.000294864	1	7.24687	IND
MAPT	206401_s_at	4137	-3.03638	0.000429758	0.0163618	4.20914	1.8049e-06	4.86423e-05	1	7.24552	IND	MAPT
PTGER3	210832_x_at	5733	-3.52437	0.00193073	0.0306785	3.66144	2.8154e-09	2.06287e-07	1	7.18582	IND	PTGER3
FBLN5	203088_at	10516	1.59492	0.0103769	0.0677725	-5.55605	2.16768e-15	1.23491e-12	4	7.15096	repr
CCL2	216598_s_at	6347	1.95826	0.00198157	0.0309472	-5.17933	1.07142e-06	3.1799e-05	4	7.13759	repr		CCL2
FER1L3	201798_s_at	26509	2.25413	0.000506369	0.0170891	-4.86973	5.55151e-06	0.00012556	4	7.12386	repr		FER1L3
ATF3	202672_s_at	467	2.24953	0.00580123	0.05013	-4.86057	1.97033e-05	0.000365681	4	7.1101	repr
EPAS1	200878_at	2034	3.9814	0.000278002	0.0137606	-3.0703	0.0140484	0.0599978	4	7.05169	repr
RAMP1	204916_at	10267	-2.40742	0.0071736	0.0563789	4.64362	9.30716e-11	1.14854e-08	1	7.05104	IND
IGFBP3	210095_s_at	3486	2.17694	0.00610076	0.051827	-4.82836	0.000111304	0.00148279	4	7.0053	repr		IGFBP3	IGFBP3
RFTN1	212646_at	23180	3.12963	0.00807706	0.0600435	-3.87283	7.37131e-05	0.00106468	4	7.00246	repr
OLFM1	213131_at	10439	-1.76259	0.00637926	0.0526325	5.22501	6.64525e-05	0.000990749	1	6.9876	IND	OLFM1
AMIGO2	222108_at	347902	3.02535	0.00214123	0.0318422	-3.95827	2.0014e-07	8.09071e-06	4	6.98363	repr
IER3	201631_s_at	8870	1.11155	0.035444	0.136644	-5.84233	5.41608e-05	0.000831807	4	6.95387	repr
CCND1	208711_s_at	595	-2.84205	0.000544574	0.0174711	4.10056	3.57849e-11	4.93552e-09	1	6.9426	IND
AKR1C1	216594_x_at	1645	1.58411	0.0666507	0.198485	-5.35186	6.53332e-07	2.08888e-05	4	6.93597	repr
PHLDA2	209803_s_at	7262	1.68494	0.00812177	0.0601987	-5.25089	2.81422e-11	4.21175e-09	4	6.93583	repr
CLEC11A	205131_x_at	6320	-2.26849	0.0601781	0.186935	4.65977	2.56253e-07	9.84965e-06	1	6.92826	IND	CLEC11A
FCGRT	218831_s_at	2217	-3.4406	2.24578e-05	0.00762237	3.46293	5.53836e-07	1.81194e-05	1	6.90353	IND	FCGRT		FCGRT
SORD	201562_s_at	6652	-2.66136	7.75902e-06	0.00514564	4.22763	5.00413e-09	3.45088e-07	1	6.88899	IND	SORD
CALCB	214636_at	797	-1.55485	0.0283683	0.119558	5.25981	1.28299e-11	2.1487e-09	1	6.81465	IND
POM121L1	213089_at	25812	-0.55803	0.0317204	0.127717	6.21901	2.28232e-15	1.23491e-12	1	6.77704	IND
AMOTL2	203002_at	51421	2.02493	0.00222847	0.0323865	-4.75198	2.45947e-13	7.52171e-11	4	6.77692	repr
HMOX1	203665_at	3162	3.34274	0.0431699	0.152715	-3.43005	7.25398e-05	0.00105205	4	6.77278	repr
TRAM2	202369_s_at	9697	3.20453	0.00426484	0.0424913	-3.56255	3.35793e-08	1.69926e-06	4	6.76708	repr		TRAM2
RGS4	204337_at	5999	3.76925	0.00412347	0.0420355	-2.99077	0.0532031	0.158276	4	6.76002	repr
NFIL3	203574_at	4783	1.64912	0.00146204	0.0272064	-5.10885	8.89194e-08	3.98436e-06	4	6.75796	repr		NFIL3
SV2B	205551_at	9899	-4.38823	0.00204639	0.0312961	2.29782	0.0610442	0.174902	1	6.68605	IND
C17orf91	214696_at	84981	2.45906	7.14857e-05	0.00991172	-4.20786	2.34086e-08	1.2965e-06	4	6.66692	repr
IL8	202859_x_at	3576	1.70029	0.135812	0.299655	-4.96544	0.000217943	0.00252556	4	6.66573	repr		IL8
RHOH	204951_at	399	-4.04522	0.000150235	0.0114732	2.59111	0.0109683	0.0500008	1	6.63632	IND	RHOH		RHOH
P4HA2	202733_at	8974	2.64381	0.0145686	0.081963	-3.97795	6.39489e-06	0.000142347	4	6.62176	repr		P4HA2
RCAN1	208370_s_at	1827	3.48294	0.000957338	0.0220784	-3.08877	1.32562e-06	3.79041e-05	4	6.57171	repr
C6orf145	212923_s_at	221749	2.39899	1.27601e-05	0.00657538	-4.15583	2.03035e-08	1.1611e-06	4	6.55483	repr
TNFRSF12A	218368_s_at	51330	3.42519	0.000249992	0.0131227	-3.04139	1.50767e-06	4.1923e-05	4	6.46657	repr
HBA2	217414_x_at	3040	-1.92622	0.0859542	0.22919	4.51563	0.0266405	0.0955092	1	6.44186	IND
GPNMB	201141_at	10457	2.48581	0.00293977	0.0369791	-3.95198	0.00184029	0.0132902	4	6.43779	repr
NPTXR	213040_s_at	23467	-2.06898	0.00421613	0.0422924	4.36391	8.69425e-08	3.97112e-06	1	6.43289	IND
PPP1R15A	202014_at	23645	2.38227	0.00762582	0.0581688	-4.04763	8.0403e-07	2.4805e-05	4	6.4299	repr
KIT	205051_s_at	3815	-1.86184	0.0233219	0.106355	4.51789	6.29458e-08	2.97155e-06	1	6.37973	IND
STARD13	213103_at	90627	-1.88372	0.0391254	0.144239	4.48831	4.89018e-12	9.29664e-10	1	6.37202	IND
TMEM194	212621_at	23306	-2.74021	0.000582143	0.0178795	3.62491	2.34334e-11	3.58327e-09	1	6.36511	IND
CDKN3	209714_s_at	1033	-2.87427	0.00398101	0.0419118	3.48336	0.000662025	0.00606339	1	6.35763	IND	CDKN3
MMP2	201069_at	4313	2.54273	0.000624132	0.0179924	-3.81272	0.000750447	0.00662314	4	6.35545	repr
NT5E	203939_at	4907	2.41317	0.00399732	0.0419118	-3.90825	4.87849e-14	1.71576e-11	4	6.32142	repr		NT5E
PCSK2	204870_s_at	5126	-4.12648	0.00140997	0.0268867	2.18076	0.0264588	0.0951078	1	6.30724	IND
BHLHB2	201170_s_at	8553	1.18386	0.0659283	0.197588	-5.09322	3.24774e-07	1.17756e-05	4	6.27708	repr		BHLHB2
FADS1	208963_x_at	3992	-1.60015	0.00025212	0.0131364	4.66652	2.07778e-09	1.5886e-07	1	6.26667	IND	FADS1
GAS1	204456_s_at	2619	-3.29165	0.0416179	0.149699	2.97208	0.000245553	0.00276355	1	6.26372	IND	GAS1
IGFBP7	201162_at	3490	3.60425	0.0131837	0.0778623	-2.63559	0.0498487	0.150617	4	6.23984	repr
SERTAD2	202656_s_at	9792	2.13005	2.43481e-05	0.00762237	-4.10626	4.23536e-06	9.99715e-05	4	6.23631	repr
GYG2	210963_s_at	8908	-3.29529	0.00134499	0.0263527	2.93735	0.00030296	0.00325346	1	6.23263	IND	GYG2
FBN1	202766_s_at	2200	2.90498	0.000832935	0.0208253	-3.31476	0.000279517	0.00308169	4	6.21975	repr		FBN1
MAGED4B	221261_x_at	81557	1.35114	0.00381872	0.041452	4.85958	1.15502e-11	2.03111e-09	2	6.21073	IND
STEAP1	205542_at	26872	-3.19483	7.19068e-06	0.00514564	3.01418	7.4277e-07	2.31179e-05	1	6.20901	IND	STEAP1
FERMT2	209210_s_at	10979	2.46133	7.29377e-05	0.00991172	-3.73413	0.000333209	0.00354023	4	6.19547	repr
TCF7L2	216035_x_at	6934	2.7948	0.000132223	0.0108146	-3.38108	1.14676e-07	5.01014e-06	4	6.17588	repr
BUB1B	203755_at	701	-2.62217	0.00280241	0.0364365	3.53956	3.00402e-05	0.000514118	1	6.16173	IND
CDKN1A	202284_s_at	1026	2.25832	0.00541471	0.0483338	-3.89727	7.40036e-07	2.31179e-05	4	6.15559	repr
NPY	206001_at	4852	0.739523	0.528722	0.694757	5.39568	2.33638e-06	6.01982e-05	2	6.1352	IND
PNMA2	209598_at	10687	-1.46164	0.00150702	0.0275174	4.66576	0.00199211	0.0142259	1	6.1274	IND
CD44	209835_x_at	960	0.862807	0.0410213	0.148581	-5.25895	4.34797e-10	4.13292e-08	4	6.12176	repr		CD44
RUNX3	204198_s_at	864	-0.735094	0.434236	0.618316	5.38621	7.21611e-07	2.27615e-05	1	6.1213	IND	RUNX3
CALD1	201617_x_at	800	2.90712	0.00246653	0.0347425	-3.20114	2.0071e-06	5.26788e-05	4	6.10826	repr
HBA1	204018_x_at	3039	-1.42774	0.15435	0.323703	4.6746	0.0135254	0.0583665	1	6.10234	IND
MT2A	212185_x_at	4502	2.50172	0.000126757	0.0108146	-3.57842	2.80148e-05	0.00049264	4	6.08014	repr
CLU	208791_at	1191	1.17711	0.13686	0.301082	-4.88865	0.00295437	0.0191178	4	6.06575	repr
ABHD6	221679_s_at	57406	-2.72053	0.000155879	0.0114732	3.34119	3.81412e-07	1.33475e-05	1	6.06172	IND
RRM2	209773_s_at	6241	-2.28743	0.000377418	0.0158021	3.76199	0.00477448	0.0273483	1	6.04943	IND
SEMA3C	203789_s_at	10512	1.80875	0.0156583	0.0854463	-4.23021	3.08403e-06	7.65207e-05	4	6.03897	repr
VRK1	203856_at	7443	-2.04918	0.000317838	0.0144361	3.96127	1.64526e-08	9.80743e-07	1	6.01044	IND
LOXL2	202998_s_at	4017	3.90422	0.00260991	0.0356468	-2.08064	0.0290168	0.102257	4	5.98487	repr		LOXL2
KIAA0101	202503_s_at	9768	-1.31789	0.00375453	0.0409448	4.66217	0.000885134	0.0075467	1	5.98005	IND
PCDH8	206935_at	5100	-0.899911	0.394588	0.580794	5.07937	1.92378e-12	4.22871e-10	1	5.97928	IND
UTS2	220784_s_at	10911	-2.19413	0.00387321	0.0417379	3.77665	0.000154631	0.00192509	1	5.97078	IND			UTS2
SMAD7	204790_at	4092	1.38094	0.00350372	0.0397657	-4.57556	2.78441e-15	1.39897e-12	4	5.95649	repr
GREM1	218468_s_at	26585	3.03725	0.0143902	0.0814977	-2.90692	4.0117e-07	1.39404e-05	4	5.94417	repr
SLC2A3	202497_x_at	6515	1.32511	0.0536313	0.172936	-4.61899	2.1557e-06	5.59528e-05	4	5.94411	repr
SNAI2	213139_at	6591	3.45148	3.34462e-05	0.00891522	-2.48301	0.00119921	0.00964029	4	5.93449	repr		SNAI2
PCDH17	205656_at	27253	-0.903976	0.0325073	0.12955	5.02434	1.78191e-09	1.37736e-07	1	5.92832	IND	PCDH17
PRC1	218009_s_at	9055	-1.88778	0.00638281	0.0526325	4.03832	0.000101883	0.00138348	1	5.9261	IND	PRC1
SDC2	212158_at	6383	2.03451	0.00395413	0.0419118	-3.88486	1.76759e-06	4.80048e-05	4	5.91937	repr			SDC2
UGCG	204881_s_at	7357	2.28122	0.000900553	0.0214678	-3.62549	3.16716e-05	0.000535525	4	5.90671	repr		UGCG
S100A10	200872_at	6281	2.87201	0.000240698	0.0127298	-3.02454	0.00016552	0.00203188	4	5.89655	repr		S100A10
MT1X	208581_x_at	4501	2.66388	6.31118e-05	0.00991172	-3.22266	0.00116445	0.00944718	4	5.88654	repr
CHN2	213385_at	1124	-1.05894	0.311054	0.501825	4.81479	3.8537e-08	1.93621e-06	1	5.87373	IND
TGFBR2	208944_at	7048	1.92522	8.57221e-05	0.00991172	-3.94714	2.21609e-05	0.000406678	4	5.87236	repr			TGFBR2
TOP2A	201292_at	7153	-2.27235	0.0039431	0.0419118	3.59815	3.77484e-05	0.000626231	1	5.87049	IND	TOP2A
OLFML3	218162_at	56944	-2.73475	0.00959885	0.0654247	-3.1305	0.000205417	0.00240017	3	5.86525	repr
NAV3	204823_at	89795	2.14409	0.0665695	0.198411	-3.66695	2.12372e-06	5.53269e-05	4	5.81104	repr
GEM	204472_at	2669	1.27263	0.0300323	0.123609	-4.53312	8.89315e-08	3.98436e-06	4	5.80575	repr
NLGN4X	221933_at	57502	-1.96132	0.00270919	0.0363109	3.8436	3.3702e-11	4.74119e-09	1	5.80492	IND
FSTL1	208782_at	11167	2.87352	0.00100172	0.0225983	-2.92965	0.00863706	0.0420146	4	5.80318	repr
JAKMIP2	205888_s_at	9832	-1.5063	0.0117056	0.0723523	4.28682	1.83816e-14	7.18311e-12	1	5.79312	IND
CRIM1	202551_s_at	51232	2.94822	9.00457e-05	0.00991172	-2.83561	7.35383e-07	2.30923e-05	4	5.78383	repr
NCKAP1L	209734_at	3071	-2.07085	0.00579008	0.0501202	3.70951	5.32364e-05	0.000823	1	5.78037	IND	NCKAP1L
TUFT1	205807_s_at	7286	1.96532	0.00130751	0.0259803	-3.79856	3.30024e-10	3.26956e-08	4	5.76388	repr
NELL2	203413_at	4753	-1.6534	0.00294928	0.0369791	4.10348	0.00024238	0.002741	1	5.75688	IND	NELL2
UGDH	203343_at	7358	1.58731	0.000797623	0.0204762	-4.1605	5.38586e-13	1.57851e-10	4	5.7478	repr
PID1	219093_at	55022	1.27973	0.0811889	0.222704	-4.44483	1.555e-12	3.77167e-10	4	5.72456	repr
NP	201695_s_at	4860	-2.05214	0.00432575	0.0429764	-3.64938	0.0001941	0.00229463	3	5.70152	repr
AKR1C2	211653_x_at	1646	1.74648	0.0932799	0.241313	-3.9542	7.32847e-05	0.00106067	4	5.70069	repr
ACTA2	200974_at	59	2.94086	0.0109861	0.0700601	-2.75244	0.0156875	0.0649593	4	5.6933	repr
GSN	200696_s_at	2934	1.9126	0.00493916	0.046016	-3.77685	0.00158339	0.0118233	4	5.68945	repr
TYMS	202589_at	7298	-2.12614	0.000422224	0.0163618	3.5601	0.00278559	0.0182268	1	5.68624	IND	TYMS
CEBPD	203973_s_at	1052	2.06008	0.00438053	0.0433981	-3.6234	0.00259078	0.0173071	4	5.68349	repr		CEBPD
GADD45A	203725_at	1647	2.02544	0.001818	0.0298084	-3.64492	5.86799e-08	2.82709e-06	4	5.67035	repr
PIM1	209193_at	5292	1.23073	0.0107111	0.0689314	-4.43468	6.29536e-06	0.000140576	4	5.66541	repr
VCAM1	203868_s_at	7412	1.07817	0.0859105	0.22919	-4.57299	7.15499e-08	3.35521e-06	4	5.65117	repr
HEG1	213069_at	57493	1.67496	0.00990188	0.0663964	-3.97257	1.28251e-07	5.5007e-06	4	5.64753	repr		HEG1
PRIM1	205053_at	5557	-3.40134	0.000115993	0.0105961	2.24532	0.0034243	0.0214484	1	5.64666	IND	PRIM1
PBK	219148_at	55872	-3.25741	0.000372486	0.0157501	2.37575	0.00551971	0.03038	1	5.63316	IND
PTRF	208789_at	284119	2.37474	0.000522599	0.0171355	-3.25002	0.00302447	0.0195175	4	5.62476	repr
PLAUR	210845_s_at	5329	1.60794	0.013032	0.0774121	-3.9994	2.1899e-09	1.65632e-07	4	5.60734	repr		PLAUR
SOX11	204913_s_at	6664	1.43601	0.0564468	0.178957	4.16056	4.78339e-07	1.62543e-05	2	5.59656	IND	SOX11
CCNB1	214710_s_at	891	-2.69958	0.00965629	0.0655621	2.88399	0.000616426	0.00574297	1	5.58357	IND
RGS16	209325_s_at	6004	1.08541	0.0717653	0.206676	-4.49149	4.08126e-14	1.51092e-11	4	5.5769	repr
KIF15	219306_at	56992	-3.01272	0.000505536	0.0170891	2.55332	0.000221804	0.00255766	1	5.56603	IND	KIF15
ADRB3	206812_at	155	-1.35139	0.0292674	0.122031	4.20547	7.80478e-10	6.53557e-08	1	5.55685	IND	ADRB3
GBE1	203282_at	2632	2.21912	4.72297e-05	0.00977098	-3.3256	0.000117615	0.00154348	4	5.54471	repr
GLG1	212045_at	2734	-1.81182	0.00222605	0.0323865	3.72625	4.26842e-17	3.33601e-14	1	5.53808	IND	GLG1
GNG12	212294_at	55970	1.95986	0.00149997	0.0274955	-3.56992	2.74558e-05	0.00048402	4	5.52977	repr
KDELR3	204017_at	11015	1.20931	0.0307129	0.12531	-4.30001	2.24441e-07	8.90831e-06	4	5.50931	repr
PTGES3	212063_at	10728	1.3154	0.0241954	0.109038	-4.16708	0.00141666	0.0108677	4	5.48248	repr
ACTN2	203861_s_at	88	-1.60972	0.00119476	0.0252371	3.8646	0.000169301	0.00206747	1	5.47432	IND	ACTN2
FAT	201579_at	2195	1.50849	0.0397091	0.145173	-3.96461	9.22008e-08	4.10468e-06	4	5.4731	repr
LAMC1	200771_at	3915	1.54187	0.0366019	0.138642	-3.92369	0.000330593	0.00351799	4	5.46556	repr
FOSL1	204420_at	8061	2.39345	0.0210306	0.10002	-3.05148	2.78836e-08	1.47468e-06	4	5.44493	repr
NQO1	201467_s_at	1728	4.30183	0.00343354	0.0394633	-1.13988	0.0209038	0.0800857	4	5.4417	repr
CSPG5	39966_at	10675	-1.74639	0.000401877	0.0160614	3.69111	4.93949e-06	0.000113544	1	5.43751	IND	CSPG5
PAFAH1B3	203228_at	5050	-1.48597	0.000132083	0.0108146	3.94411	9.7445e-10	7.87849e-08	1	5.43008	IND
GCLM	203925_at	2730	2.06287	0.0193172	0.0951548	-3.36049	1.6331e-08	9.80743e-07	4	5.42336	repr
ATP1A1	220948_s_at	476	-1.3468	0.00180558	0.0297967	4.04337	1.90899e-10	2.0981e-08	1	5.39017	IND
HTRA1	201185_at	5654	1.78877	0.0620831	0.190612	-3.59882	0.013364	0.0579189	4	5.38759	repr
TSC22D3	208763_s_at	1831	2.39353	0.00861088	0.0617497	-2.99394	0.00142785	0.0109169	4	5.38748	repr
MBNL2	205018_s_at	10150	2.37741	0.00385588	0.0416625	-2.94829	1.7511e-10	1.95512e-08	4	5.32571	repr
IL13RA1	201887_at	3597	1.58835	0.00100928	0.0226091	-3.728	1.32574e-09	1.05969e-07	4	5.31634	repr
KCTD12	212188_at	115207	1.63717	0.0117441	0.0724633	-3.66815	3.04105e-07	1.12583e-05	4	5.30531	repr
PPIC	204518_s_at	5480	2.43437	0.000188869	0.0116294	-2.86547	1.4567e-05	0.000287016	4	5.29984	repr		PPIC
DMN	212730_at	23336	1.46212	0.0283427	0.119558	-3.83025	1.92242e-05	0.000357734	4	5.29236	repr		DMN
FHL2	202949_s_at	2274	1.94162	0.0251015	0.111116	-3.33876	0.0018236	0.0132103	4	5.28038	repr
TFPI	213258_at	7035	2.30754	0.00333892	0.0390807	-2.9707	0.000302086	0.00324904	4	5.27824	repr
RRAS2	212589_at	22800	1.34125	0.0045194	0.0439103	-3.93602	5.16977e-07	1.71529e-05	4	5.27727	repr
PRSS23	202458_at	11098	1.91725	0.00168841	0.0288007	-3.34887	0.000145233	0.00183077	4	5.26611	repr
SPRY1	212558_at	10252	1.91857	0.0115529	0.0715973	-3.33685	3.51842e-06	8.50467e-05	4	5.25542	repr		SPRY1
TPX2	210052_s_at	22974	-2.28248	0.0228988	0.105068	2.94925	0.00330164	0.02096	1	5.23172	IND	TPX2
KIF20A	218755_at	10112	-2.43549	0.0270684	0.116451	2.78746	9.36712e-05	0.00128688	1	5.22295	IND
DLC1	210762_s_at	10395	1.53681	0.00628088	0.0525319	-3.67992	8.37518e-06	0.000176708	4	5.21673	repr
CDC20	202870_s_at	991	-1.70891	0.0344221	0.134067	3.50163	0.00270525	0.0178901	1	5.21054	IND	CDC20
GINS1	206102_at	9837	-2.56738	0.00018875	0.0116294	2.63946	0.000286553	0.00313277	1	5.20684	IND
FAM114A1	213455_at	92689	1.89506	0.00616936	0.0520952	-3.31106	0.000240642	0.00273012	4	5.20612	repr
ARHGEF10	216620_s_at	9639	1.10537	0.00853022	0.0615585	-4.09956	5.53946e-08	2.70587e-06	4	5.20493	repr
FOXM1	202580_x_at	2305	-2.55744	0.0076533	0.0581982	2.64108	0.00400776	0.0240329	1	5.19853	IND	FOXM1	FOXM1
SERPINE1	202627_s_at	5054	2.19609	0.0394595	0.14489	-2.99399	0.00399151	0.0239559	4	5.19009	repr
RNF141	219104_at	50862	-2.40332	2.29416e-05	0.00762237	2.77332	3.06185e-06	7.63726e-05	1	5.17663	IND
CADPS2	219572_at	93664	-1.95193	0.000351393	0.0153488	3.22465	3.9156e-05	0.00064502	1	5.17657	IND
GRP	206326_at	2922	-2.42198	0.00356327	0.04006	2.75206	0.00141728	0.0108677	1	5.17404	IND
MLF1IP	218883_s_at	79682	-2.08472	0.000282962	0.0137606	3.08007	0.000531162	0.00511807	1	5.16479	IND
RECK	205407_at	8434	0.797011	0.0211141	0.100349	-4.33638	4.13617e-21	5.81876e-18	4	5.13339	repr
PALLD	200907_s_at	23022	2.54467	3.55242e-05	0.00892418	-2.57953	0.014974	0.0626204	4	5.1242	repr		PALLD
FADS2	202218_s_at	9415	-0.830999	0.0647988	0.195956	4.28502	2.5775e-10	2.66619e-08	1	5.11602	IND
TIMP3	201149_s_at	7078	-1.3089	0.0750005	0.212182	-3.80653	0.000127212	0.00165012	3	5.11543	repr
CSRP2	211126_s_at	1466	1.70414	0.0266667	0.115572	-3.40359	1.35684e-08	8.37195e-07	4	5.10772	repr		CSRP2
NUPR1	209230_s_at	26471	3.15735	0.00100522	0.0225983	-1.94549	0.0262501	0.0947374	4	5.10284	repr
FOXC1	213260_at	2296	2.27268	0.0252258	0.111526	-2.82991	3.58444e-07	1.27656e-05	4	5.10259	repr
KDSR	202419_at	2531	-2.33127	9.31756e-05	0.00991172	2.76905	3.4705e-06	8.41776e-05	1	5.10031	IND
MT1L	204326_x_at	4500	2.24073	0.000911697	0.0214678	-2.85217	0.0101316	0.0471335	4	5.0929	repr
ANGPTL4	221009_s_at	51129	1.16029	0.0463656	0.158395	-3.92858	1.43488e-11	2.29386e-09	4	5.08888	repr
TGFBI	201506_at	7045	2.8416	0.0109064	0.069678	-2.23484	0.0885838	0.226765	4	5.07644	repr		TGFBI	TGFBI
LDB2	206481_s_at	9079	-2.91131	2.24475e-05	0.00762237	2.16229	0.00911284	0.0436349	1	5.0736	IND	LDB2
ITGB5	201125_s_at	3693	1.0786	0.0102482	0.0672744	-3.90925	7.86136e-06	0.000168075	4	4.98785	repr
NUAK1	204589_at	9891	2.34017	0.0006858	0.0187701	-2.64408	0.0055739	0.0306303	4	4.98425	repr
MKI67	212021_s_at	4288	-3.31711	0.000472697	0.0170719	1.66645	0.0416062	0.133147	1	4.98356	IND	MKI67
EMP1	201324_at	2012	1.20395	0.0414606	0.149402	-3.77704	2.38957e-05	0.000432088	4	4.98098	repr		EMP1
GLCE	213552_at	26035	-1.13342	0.0272123	0.116786	3.8246	7.8191e-18	6.87495e-15	1	4.95801	IND	GLCE
KIF4A	218355_at	24137	-2.32809	0.0105439	0.0683261	2.61327	0.000643354	0.00592324	1	4.94136	IND
CENPA	204962_s_at	1058	-2.81152	0.0022043	0.0322774	2.11612	0.00343487	0.0214826	1	4.92764	IND	CENPA
MMP9	203936_s_at	4318	-0.686524	0.0944839	0.243443	4.24023	2.31641e-05	0.000419938	1	4.92675	IND
GCH1	204224_s_at	2643	-1.18473	0.056697	0.179481	-3.73975	0.000860683	0.00740103	3	4.92448	repr	GCH1
CYBRD1	217889_s_at	79901	1.21927	0.053646	0.172936	-3.69858	4.76632e-10	4.35407e-08	4	4.91784	repr
CBR3	205379_at	874	-2.43094	4.20295e-05	0.00923861	-2.48124	1.71679e-07	7.20301e-06	3	4.91218	repr
SPRY2	204011_at	10253	1.57914	0.00760856	0.0581589	-3.32639	3.10252e-07	1.14257e-05	4	4.90553	repr		SPRY2
HOOK1	219976_at	51361	-1.46989	0.00337578	0.0393134	3.43206	5.97807e-08	2.86053e-06	1	4.90195	IND	HOOK1
HSPA1A	200800_s_at	3303	2.93661	0.00181073	0.0297967	-1.95247	0.0125094	0.0553197	4	4.88907	repr
MEIS2	207480_s_at	4212	1.17927	0.0591185	0.184571	-3.70079	3.29441e-07	1.18835e-05	4	4.88006	repr		MEIS2
COL5A2	221730_at	1290	2.52715	0.00420411	0.0422676	-2.348	0.00839741	0.0411907	4	4.87515	repr		COL5A2
RFC4	204023_at	5984	-1.71838	0.00123765	0.0253071	3.15222	0.000276656	0.00305494	1	4.8706	IND
ARID5B	212614_at	84159	2.26383	0.00304589	0.0377197	-2.60523	0.00208383	0.014643	4	4.86906	repr
RNASEH2A	203022_at	10535	-2.60488	0.000334654	0.0149934	2.25491	2.7099e-05	0.000480137	1	4.85979	IND	RNASEH2A
DLG7	203764_at	9787	-2.61034	0.0173082	0.0904501	2.242	0.00181029	0.013141	1	4.85234	IND	DLG7
AXL	202686_s_at	558	0.752438	0.0756855	0.213376	-4.07101	2.01914e-06	5.27978e-05	4	4.82345	repr
SRPX2	205499_at	27286	1.75785	0.00028562	0.0137606	-3.06514	1.05226e-11	1.94779e-09	4	4.82299	repr		SRPX2
DUSP5	209457_at	1847	2.20365	0.0717813	0.206676	-2.61714	0.00867669	0.0421199	4	4.82079	repr			DUSP5
MID1	203636_at	4281	3.09272	0.000826339	0.0208089	-1.72069	0.000546349	0.00524319	4	4.81341	repr
LYPD1	212909_at	116372	-1.72324	0.0157966	0.0859709	3.08437	5.85169e-05	0.000889002	1	4.80761	IND
TFAP2B	214451_at	7021	-1.65744	0.0446896	0.155156	3.14926	9.73876e-05	0.001325	1	4.8067	IND	TFAP2B
SERPING1	200986_at	710	-1.02089	0.00337225	0.0393134	-3.77783	0.000118449	0.00155152	3	4.79872	repr
MRPL35	218890_x_at	51318	-2.05739	9.17666e-05	0.00991172	2.73905	0.000109551	0.00146499	1	4.79644	IND	MRPL35
PNMAL1	218824_at	55228	-0.986024	0.0648684	0.196024	3.8045	0.000891764	0.00759402	1	4.79052	IND
FANCI	213008_at	55215	-2.2698	0.00022863	0.0126629	2.52063	0.000182474	0.00218199	1	4.79044	IND
GFPT1	202721_s_at	2673	3.44921	0.000118412	0.0106783	-1.33878	0.00312963	0.0200673	4	4.78799	repr			GFPT1
CDKN1C	213348_at	1028	1.95908	0.090719	0.237099	-2.82631	0.013052	0.0569526	4	4.78538	repr		CDKN1C
SAMD4A	212845_at	23034	1.5534	0.00752332	0.057835	-3.21894	1.19938e-05	0.000238333	4	4.77234	repr
GLB1L2	213713_s_at	89944	-2.98498	8.77846e-06	0.00514564	1.77862	0.00188574	0.0135502	1	4.7636	IND
MICA	205904_at	4276	2.20586	0.000147558	0.0114732	-2.54086	4.8438e-07	1.63804e-05	4	4.74673	repr
PAM	212958_x_at	5066	1.0466	0.036853	0.139143	-3.69967	4.36254e-05	0.000697411	4	4.74627	repr
CTSO	203758_at	1519	1.75499	0.0015966	0.0280761	-2.98631	2.26605e-07	8.90831e-06	4	4.7413	repr
ITGB2	202803_s_at	3689	-1.77374	0.00178285	0.0295768	2.94839	0.0150399	0.0628583	1	4.72213	IND			ITGB2
SPARC	212667_at	6678	2.47619	0.000177804	0.0114732	-2.22565	0.0470439	0.144249	4	4.70184	repr		SPARC
MYO1B	212365_at	4430	1.09092	0.0147273	0.0823139	-3.59501	2.49859e-08	1.36241e-06	4	4.68593	repr
TGFBR3	204731_at	7049	0.670108	0.0742846	0.211286	-4.01278	1.56983e-06	4.33028e-05	4	4.68289	repr
DKK2	219908_at	27123	-1.03671	0.184917	0.360436	3.64618	9.10884e-09	5.82469e-07	1	4.68289	IND
NNMT	202237_at	4837	1.1609	0.00208563	0.0314588	-3.49929	0.00351749	0.0218377	4	4.66019	repr
NUDT1	204766_s_at	4521	-2.56941	0.000357274	0.0154176	2.08144	0.000675114	0.00616721	1	4.65084	IND	NUDT1
ZWINT	204026_s_at	11130	-1.92524	0.00374184	0.0409333	2.72411	0.00523869	0.0293384	1	4.64935	IND
CAP2	212551_at	10486	1.87639	0.0025652	0.0353566	-2.76256	0.00953803	0.0452397	4	4.63894	repr
ZFP36L2	201368_at	678	1.48834	0.000318112	0.0144361	-3.14807	0.000709937	0.00637765	4	4.63641	repr		ZFP36L2
HIST1H2BD	209911_x_at	3017	1.34756	0.0656714	0.19707	3.28479	3.82853e-05	0.000633644	2	4.63235	IND
CAD	202715_at	790	-1.80724	8.06156e-05	0.00991172	2.81883	1.84523e-05	0.000345557	1	4.62607	IND	CAD
CD302	203799_at	9936	-0.564882	0.0421712	0.150575	-4.05321	3.11574e-06	7.66298e-05	3	4.61809	repr
ALDH7A1	208950_s_at	501	-1.86649	0.00543205	0.0484272	2.75142	4.06026e-06	9.61612e-05	1	4.61791	IND
LIG1	202726_at	3978	-2.19659	0.0033886	0.0393974	2.41775	7.40812e-05	0.0010678	1	4.61434	IND
CCNB2	202705_at	9133	-2.0251	0.0031265	0.0378517	2.58696	0.00466004	0.0268458	1	4.61206	IND	CCNB2
C6orf108	204238_s_at	10591	-2.87483	0.000527464	0.0171603	1.73486	0.0246344	0.0905676	1	4.6097	IND
HMMR	207165_at	3161	-2.23765	0.0134496	0.0787714	2.36834	0.00598931	0.0320128	1	4.60599	IND
SH2B3	203320_at	10019	-2.60972	0.00187064	0.0299729	1.99531	0.00171825	0.0126557	1	4.60503	IND	SH2B3
ATAD2	218782_s_at	29028	-2.9293	0.0044725	0.0436332	1.66318	0.0106054	0.0487255	1	4.59247	IND	ATAD2
CNN3	201445_at	1266	0.989454	0.00637957	0.0526325	-3.59929	0.000265266	0.00295235	4	4.58874	repr
TLE2	40837_at	7089	-1.64843	0.00225857	0.0327018	2.90783	1.90083e-06	5.06455e-05	1	4.55627	IND
AKR1C3	209160_at	8644	1.38737	0.055399	0.176724	-3.16283	0.00582748	0.0314827	4	4.5502	repr
CDC42EP3	209288_s_at	10602	3.22051	0.00037246	0.0157501	-1.32936	0.0961719	0.23956	4	4.54987	repr
CENPM	218741_at	79019	-3.04482	0.00139369	0.0268867	1.50289	0.0532161	0.158276	1	4.54771	IND	CENPM
TACC3	218308_at	10460	-1.77507	0.0204434	0.0979555	2.76344	0.000638912	0.00590529	1	4.53851	IND	TACC3
KLF2	219371_s_at	10365	1.71728	0.0133997	0.0786565	-2.81399	0.000429487	0.00429731	4	4.53126	repr
IRS2	209184_s_at	8660	-1.107	0.0707671	0.205634	3.41542	3.90566e-06	9.31267e-05	1	4.52242	IND	IRS2
FHL1	214505_s_at	2273	2.69889	0.00294839	0.0369791	-1.82315	0.0391592	0.12758	4	4.52204	repr
POLA1	204835_at	5422	-2.84542	0.00054892	0.0174711	1.6709	0.000145042	0.00183077	1	4.51631	IND
KIAA1797	218503_at	54914	-1.13515	0.00710491	0.0560897	3.37621	5.57299e-10	4.85322e-08	1	4.51136	IND
ASPH	210896_s_at	444	1.85886	0.00247386	0.0347425	-2.63746	1.34862e-06	3.80896e-05	4	4.49632	repr
ATXN1	203232_s_at	6310	2.51149	0.000100047	0.00991172	-1.97909	0.0253434	0.0924133	4	4.49058	repr
LPP	202822_at	4026	2.11818	0.000845088	0.0208253	-2.36538	0.000777639	0.00682885	4	4.48356	repr
IFRD1	202146_at	3475	1.31348	0.0089401	0.0632643	-3.14125	1.21453e-07	5.27344e-06	4	4.45473	repr
COL6A1	213428_s_at	1291	2.38398	0.00310633	0.037845	-2.06622	0.0464776	0.143137	4	4.4502	repr		COL6A1
SYT1	203999_at	6857	-1.69055	0.0269293	0.116209	2.75947	0.0884927	0.226765	1	4.45002	IND	SYT1
PRKDC	208694_at	5591	-1.0496	0.00455992	0.043998	3.38999	1.76234e-07	7.29378e-06	1	4.4396	IND
HSPA1B	202581_at	3304	2.29935	0.00145407	0.0271796	-2.11962	0.0373346	0.12335	4	4.41897	repr
MELK	204825_at	9833	-1.53508	0.00946669	0.0649717	2.87091	9.3097e-05	0.00128167	1	4.40599	IND
MCM2	202107_s_at	4171	-2.22997	0.00026467	0.0135768	2.17577	0.0453631	0.140814	1	4.40575	IND
ELL2	214446_at	22936	2.2826	0.00442135	0.0435052	-2.12116	3.20118e-06	7.79138e-05	4	4.40377	repr
BAG3	217911_s_at	9531	1.39098	0.00434296	0.0430865	-3.01049	3.00095e-05	0.000514118	4	4.40147	repr
KIF11	204444_at	3832	-2.04394	0.00392818	0.0419118	2.3567	0.000498333	0.00486168	1	4.40064	IND
RAI14	202052_s_at	26064	3.06965	9.60857e-05	0.00991172	-1.32981	0.0581885	0.169233	4	4.39946	repr		RAI14
ZC3H13	212402_at	23091	-0.739664	0.0619053	0.190232	3.65885	3.06464e-10	3.12416e-08	1	4.39852	IND
DTL	218585_s_at	51514	-2.1719	6.30685e-05	0.00991172	2.21754	0.000799105	0.00697382	1	4.38944	IND
ITGB3BP	205176_s_at	23421	-2.42389	7.77974e-05	0.00991172	1.96492	0.00432321	0.0253412	1	4.38881	IND	ITGB3BP
COL6A2	209156_s_at	1292	1.74372	0.00821496	0.0606975	-2.63726	0.0655582	0.184381	4	4.38097	repr		COL6A2
DNAJC9	213092_x_at	23234	-2.11858	0.000554582	0.0175718	2.25563	4.00074e-05	0.000655971	1	4.37421	IND
NUDT11	219855_at	55190	-1.16467	0.00989545	0.0663964	3.20779	2.75783e-07	1.04857e-05	1	4.37247	IND	NUDT11
SGK1	201739_at	6446	1.52519	0.0230054	0.105351	-2.82795	0.00214491	0.0149527	4	4.35314	repr
PARVA	217890_s_at	55742	1.46995	0.00121949	0.0253071	-2.8792	2.86425e-05	0.000501172	4	4.34915	repr
MCM3	201555_at	4172	-2.06455	5.12239e-05	0.00991172	2.27045	0.00419886	0.0248382	1	4.335	IND
LIMA1	217892_s_at	51474	2.04181	0.000394846	0.016054	-2.28809	0.003337	0.0211083	4	4.3299	repr
DRAM	218627_at	55332	2.21362	0.00414033	0.0420393	-2.11522	1.34828e-06	3.80896e-05	4	4.32884	repr
HOXD13	207398_at	3239	-2.48868	0.00216486	0.031932	1.82709	0.00277535	0.0181767	1	4.31577	IND
NPY1R	205440_s_at	4886	-1.66507	0.00989599	0.0663964	2.64768	0.000269219	0.00299161	1	4.31275	IND	NPY1R
BACH1	204194_at	571	1.4523	0.000595131	0.0178795	-2.86009	3.29948e-10	3.26956e-08	4	4.31238	repr
NOV	214321_at	4856	1.49444	0.0953911	0.244549	-2.81501	0.000345535	0.00363876	4	4.30945	repr
ZDHHC3	218078_s_at	51304	-2.08313	0.00111971	0.024234	2.22301	2.30299e-05	0.000418585	1	4.30614	IND	ZDHHC3
KNTC1	206316_s_at	9735	-2.18242	2.92259e-05	0.00822299	2.11955	3.46667e-05	0.000581971	1	4.30197	IND
TMEM106C	201764_at	79022	-1.62202	0.00410823	0.0420262	2.67292	0.00011186	0.00148457	1	4.29495	IND
EZH2	203358_s_at	2146	-1.46848	0.000195091	0.0116294	2.82346	5.79424e-05	0.000886015	1	4.29194	IND	EZH2
MYOM2	205826_at	9172	-1.88004	0.0100675	0.0668014	2.39662	0.00742696	0.0376378	1	4.27666	IND	MYOM2
RANBP5	211952_at	3843	-2.16459	9.68766e-05	0.00991172	2.10434	7.80295e-06	0.000167847	1	4.26893	IND			RANBP5
VCAN	221731_x_at	1462	1.70408	0.0662745	0.198204	-2.55752	0.0625524	0.17794	4	4.26161	repr
SNX7	205573_s_at	51375	-1.39751	0.00654569	0.0535377	-2.86044	0.000229412	0.00261537	3	4.25795	repr
CD59	200984_s_at	966	1.29576	0.000391034	0.016054	-2.96149	0.000858369	0.00739017	4	4.25725	repr
LARP6	218651_s_at	55323	1.84886	0.00526233	0.0474182	-2.40766	0.00370249	0.0226071	4	4.25652	repr
CBLB	209682_at	868	1.00837	0.00503234	0.0467602	-3.23118	4.70275e-07	1.60578e-05	4	4.23955	repr
MLLT11	211071_s_at	10962	0.807739	0.0674122	0.19999	3.43023	0.00820369	0.040523	2	4.23796	IND
DDB2	203409_at	1643	-2.06729	0.000454802	0.01679	2.16288	0.00046345	0.0045657	1	4.23017	IND
CYP26B1	219825_at	56603	-1.88302	0.0451481	0.156285	2.34314	0.00471564	0.027096	1	4.22616	IND
PEA15	200788_s_at	8682	2.38255	0.000648307	0.0183879	-1.83778	0.0272812	0.0970152	4	4.22033	repr		PEA15
STEAP3	218424_s_at	55240	-1.31435	0.00351488	0.0398127	2.90397	0.000319577	0.00342146	1	4.21831	IND
HIST1H2AC	215071_s_at	8334	0.654192	0.414092	0.601358	3.54908	0.000209341	0.00244197	2	4.20327	IND
PTPN13	204201_s_at	5783	-1.42415	0.000591134	0.0178795	2.77709	4.78829e-09	3.36809e-07	1	4.20124	IND	PTPN13
TTK	204822_at	7272	-1.83983	0.022573	0.104254	2.35948	0.00227028	0.0156254	1	4.19931	IND
INPP1	202794_at	3628	1.40865	0.00415373	0.0420393	-2.7793	0.000717283	0.00641905	4	4.18794	repr
CD55	201926_s_at	1604	1.11062	0.0718558	0.206806	-3.0773	0.000147518	0.00184963	4	4.18791	repr
SMC2	204240_s_at	10592	-2.85286	0.00285979	0.0366995	1.33062	0.0426013	0.135102	1	4.18348	IND	SMC2
ASS1	207076_s_at	445	2.33307	0.00357089	0.04006	-1.84266	0.0801559	0.211597	4	4.17573	repr		ASS1
TMEM97	212281_s_at	27346	-1.09967	0.00500413	0.0465596	3.07484	0.00146263	0.0111223	1	4.1745	IND	TMEM97
SALL2	213283_s_at	6297	-1.16214	0.0204166	0.0979555	3.01018	6.19927e-07	2.00026e-05	1	4.17232	IND	SALL2
FNBP1	213940_s_at	23048	-1.69905	0.00278596	0.0364365	2.45817	0.000508562	0.00494092	1	4.15722	IND	FNBP1
ESPL1	204817_at	9700	-2.97615	0.000208085	0.0120282	1.16726	0.0378802	0.124684	1	4.14341	IND
EPHA4	206114_at	2043	1.1349	0.106604	0.26109	2.99707	3.1481e-06	7.71558e-05	2	4.13197	IND
JAG1	216268_s_at	182	2.44132	0.00929818	0.0645641	-1.68945	0.0199312	0.0778002	4	4.13077	repr
CDC2	203214_x_at	983	-2.64617	0.0151503	0.0839771	1.48446	0.0961784	0.23956	1	4.13063	IND
HELLS	220085_at	3070	-2.32908	0.00204666	0.0312961	1.79846	0.000904974	0.00766617	1	4.12754	IND	HELLS
UPP1	203234_at	7378	1.74293	0.037958	0.141869	-2.37443	0.00194299	0.0139317	4	4.11737	repr
PLCXD1	218951_s_at	55344	-1.72747	0.00171319	0.0288007	2.38434	5.13557e-08	2.52612e-06	1	4.11181	IND
CYLD	221903_s_at	1540	1.40039	0.00694446	0.0556036	-2.70448	0.00135598	0.0106096	4	4.10488	repr
CTSL1	202087_s_at	1514	1.04245	0.0452219	0.156445	-3.06229	8.14388e-07	2.50149e-05	4	4.10474	repr
STMN1	200783_s_at	3925	-0.921156	0.0479114	0.162023	3.17542	4.02318e-07	1.39404e-05	1	4.09658	IND
GSTM4	204149_s_at	2948	-2.81114	0.00272048	0.0363109	1.2822	0.0141165	0.060179	1	4.09333	IND	GSTM4
WNT5A	205990_s_at	7474	-1.73296	0.0272588	0.116914	2.35319	7.46796e-05	0.00107203	1	4.08616	IND
PAPSS2	203060_s_at	9060	0.767109	0.0971601	0.247438	-3.31403	0.000372244	0.00385054	4	4.08114	repr		PAPSS2
SLC26A2	205097_at	1836	-2.06798	0.00673602	0.0545866	2.01186	0.0198345	0.0775436	1	4.07984	IND
NEU1	208926_at	4758	2.28272	7.50495e-05	0.00991172	-1.78817	0.000210675	0.00245345	4	4.07089	repr
TROAP	204649_at	10024	-2.99929	0.00156236	0.027962	1.06991	0.0156013	0.0648578	1	4.0692	IND		TROAP
UBE2C	202954_at	11065	-1.51847	0.0192978	0.0951548	2.54498	0.000330178	0.00351799	1	4.06345	IND
GALNT1	201724_s_at	2589	2.18009	0.000182683	0.0114732	-1.88149	0.00538918	0.0299191	4	4.06158	repr		GALNT1
MT1H	206461_x_at	4496	1.06468	0.00445726	0.0436332	-2.99551	0.000323084	0.00345376	4	4.06019	repr
WASF1	204165_at	8936	-1.01474	0.0040589	0.0419118	3.0437	0.000136355	0.00174386	1	4.05843	IND	WASF1
MYO10	216222_s_at	4651	-2.96538	0.000291008	0.0139248	1.09025	0.03688	0.122423	1	4.05563	IND	MYO10
CACNB2	213714_at	783	-1.67385	0.0104475	0.0680441	2.38094	0.000764656	0.00674009	1	4.05479	IND	CACNB2		CACNB2
H2AFY2	218445_at	55506	-1.25551	0.0134908	0.0788447	2.79895	1.91858e-12	4.22871e-10	1	4.05446	IND	H2AFY2
CDC25B	201853_s_at	994	-1.72366	0.00170758	0.0288007	2.32015	0.0130998	0.0570905	1	4.0438	IND		CDC25B
MT1E	212859_x_at	4493	1.10891	0.0182194	0.0926647	-2.91814	0.0086388	0.0420146	4	4.02705	repr
CCDC109B	218802_at	55013	-1.76713	0.0102624	0.0672744	-2.25873	0.0125383	0.0553336	3	4.02586	repr
MT1F	217165_x_at	4494	1.11403	0.00996486	0.0665649	-2.90905	0.00571482	0.0311331	4	4.02308	repr
NR3C1	201865_x_at	2908	1.02863	0.0960263	0.245439	-2.99145	6.79094e-05	0.00100678	4	4.02008	repr		NR3C1
LAMB2	216264_s_at	3913	1.1956	0.00405383	0.0419118	-2.81478	0.000205196	0.00240017	4	4.01038	repr
MYLK	202555_s_at	4638	0.912031	0.532495	0.698232	-3.09676	0.00406001	0.0242106	4	4.00879	repr
UCP2	208998_at	7351	-1.58164	0.000548663	0.0174711	2.42407	0.0527402	0.157192	1	4.00571	IND
RP4-691N24.1	207705_s_at	22981	-0.762834	0.0842403	0.226792	3.2215	9.29205e-09	5.88831e-07	1	3.98433	IND
PDSS1	220865_s_at	23590	-2.53912	0.00127249	0.0257338	1.43928	0.00664186	0.0346066	1	3.9784	IND	PDSS1
PCDH9	219737_s_at	5101	1.0266	0.0890595	0.234238	-2.94794	0.00343642	0.0214826	4	3.97454	repr
FAM3C	201889_at	10447	1.38331	0.00269359	0.0363109	-2.58912	0.000190745	0.00225875	4	3.97243	repr		FAM3C
NME4	212739_s_at	4833	-1.29649	0.000726716	0.0193626	2.67538	8.61438e-05	0.00119987	1	3.97187	IND
IGSF3	202421_at	3321	-1.79107	0.00706108	0.055932	2.177	0.000701775	0.00633358	1	3.96807	IND
RCOR1	212612_at	23186	-1.11356	0.00402543	0.0419118	2.84795	2.92734e-08	1.52526e-06	1	3.96151	IND	RCOR1
NCAPG	218663_at	64151	-2.44693	0.0012281	0.0253071	1.51371	0.00340084	0.0213585	1	3.96064	IND
COQ10B	219397_at	80219	0.723135	0.0246595	0.109851	-3.23112	3.97496e-09	2.82423e-07	4	3.95426	repr
CKAP2	218252_at	26586	-1.658	0.00697057	0.0556538	2.2892	0.000259316	0.00289988	1	3.9472	IND
RGS2	202388_at	5997	1.57948	0.0229707	0.105278	-2.35992	0.0509213	0.152807	4	3.9394	repr
HOXB13	209844_at	10481	-1.4481	0.177054	0.351211	2.48453	0.000968328	0.00807974	1	3.93263	IND
DST	212254_s_at	667	1.9132	0.000603838	0.0178795	-2.01905	0.0461375	0.142436	4	3.93225	repr
SLC5A6	204087_s_at	8884	-2.29951	0.0011571	0.0247388	1.63103	0.000829339	0.00717536	1	3.93054	IND	SLC5A6
QSOX1	201482_at	5768	2.32612	2.58355e-05	0.00762237	-1.60326	0.00596744	0.0319444	4	3.92937	repr
HJURP	218726_at	55355	-2.5697	0.021497	0.101415	1.34774	0.0145342	0.0612534	1	3.91744	IND
VCL	200931_s_at	7414	1.71047	0.00999462	0.066574	-2.20207	0.00981797	0.046132	4	3.91254	repr
SLC5A3	212944_at	6526	1.69614	0.00248599	0.0347425	-2.21301	0.00170549	0.0125862	4	3.90915	repr
BLM	205733_at	641	-2.66541	6.41716e-05	0.00991172	1.24222	0.0593726	0.17158	1	3.90762	IND	BLM
NEUROD6	220045_at	63974	-2.08347	0.0880595	0.232424	1.81935	0.0193225	0.0760574	1	3.90282	IND			NEUROD6
XBP1	200670_at	7494	1.5116	0.00950319	0.0650247	-2.38987	0.000721192	0.00643677	4	3.90147	repr		XBP1
AHNAK	211986_at	79026	1.5893	0.00772445	0.0585493	-2.30284	0.0351793	0.117946	4	3.89214	repr
SCPEP1	218217_at	59342	0.683479	0.0481769	0.162531	-3.20864	3.02144e-07	1.12583e-05	4	3.89212	repr		SCPEP1
RIT1	209882_at	6016	2.79651	1.48035e-05	0.00657538	-1.08871	0.00352855	0.0218505	4	3.88521	repr
SLC30A1	212907_at	7779	1.54905	0.0778077	0.216348	-2.32596	0.000570316	0.00542108	4	3.87501	repr
RBMS1	209868_s_at	5937	1.76257	0.00242785	0.0345	-2.10847	0.0237761	0.0880679	4	3.87104	repr		RBMS1
PRRX1	205991_s_at	5396	1.0867	0.039287	0.144607	-2.77883	0.000147887	0.00185095	4	3.86553	repr	PRRX1
MEIS1	204069_at	4211	-2.00247	0.000451068	0.01679	1.85932	0.0166545	0.0678724	1	3.86179	IND	MEIS1
LRRC17	205381_at	10234	1.58704	0.0592063	0.184764	-2.27376	0.00355641	0.0219903	4	3.8608	repr		LRRC17
MICAL2	212473_s_at	9645	1.29913	0.0632055	0.192963	-2.56111	0.0203967	0.0789051	4	3.86024	repr
PADI2	209791_at	11240	-0.981172	0.0714088	0.206092	2.87168	0.00453012	0.0263129	1	3.85285	IND	PADI2
PTPN12	202006_at	5782	1.16857	0.0104844	0.0680956	-2.66935	2.85011e-06	7.2114e-05	4	3.83792	repr		PTPN12
MT1P2	211456_x_at	645745	1.25596	0.000579621	0.0178795	-2.58087	0.000991411	0.00822363	4	3.83683	repr
PGCP	208454_s_at	10404	0.977053	0.00453211	0.0439103	-2.85914	5.12576e-10	4.56387e-08	4	3.83619	repr
NDUFA7	202785_at	4701	-1.09193	0.00732749	0.0570782	2.74335	8.20452e-05	0.00115653	1	3.83528	IND
KIF14	206364_at	9928	-1.96419	0.00826389	0.0607313	1.86739	0.000495592	0.00484166	1	3.83158	IND	KIF14
FTH1	214211_at	2495	2.23834	0.00213813	0.0318422	-1.5901	0.0506711	0.152252	4	3.82845	repr
ALG6	219649_at	29929	-2.39221	0.000214627	0.0122335	1.42945	0.00504838	0.0285912	1	3.82167	IND
CYB5A	207843_x_at	1528	-1.16153	0.00571733	0.0498531	-2.6499	0.00270354	0.0178901	3	3.81143	repr
GNAI1	209576_at	2770	2.06105	0.000180679	0.0114732	-1.7444	0.000365404	0.00379408	4	3.80545	repr
RACGAP1	222077_s_at	29127	-1.33402	0.0429304	0.152252	2.46522	0.000868251	0.00745699	1	3.79924	IND
PEG3	209242_at	5178	-0.961376	0.0707762	0.205634	2.82018	0.0504449	0.151766	1	3.78155	IND	PEG3
HERPUD1	217168_s_at	9709	1.71737	0.00375206	0.0409448	-2.06164	0.000401903	0.00408821	4	3.77901	repr
JUN	201464_x_at	3725	1.3913	0.0631652	0.192963	-2.38312	0.0103625	0.0478592	4	3.77442	repr
NAIP	204860_s_at	4671	-1.16665	0.0743136	0.211286	2.6068	0.000365708	0.00379408	1	3.77345	IND
NRP1	210510_s_at	8829	1.2852	0.00348398	0.0397657	-2.48341	8.81196e-08	3.98436e-06	4	3.76861	repr
SMURF2	205596_s_at	64750	1.00309	0.0765075	0.214918	-2.75689	2.52484e-05	0.000453054	4	3.75998	repr
RMI1	218979_at	80010	-1.61928	0.00516519	0.0471985	2.14008	1.67583e-07	7.14412e-06	1	3.75936	IND	RMI1
SULF1	212354_at	23213	1.40861	0.0730873	0.209363	-2.35054	0.00173544	0.0127503	4	3.75915	repr			SULF1
COQ2	213379_at	27235	-1.56217	0.00011245	0.0104075	2.19084	6.63449e-05	0.000990749	1	3.75302	IND
LTBP1	202729_s_at	4052	2.22808	0.00192387	0.0306785	-1.50957	0.0343386	0.11579	4	3.73765	repr
MCM7	210983_s_at	4176	-1.81315	0.00468134	0.0445267	1.924	0.0477511	0.145782	1	3.73716	IND	MCM7
PDGFA	205463_s_at	5154	1.59705	0.0226767	0.104458	-2.13258	0.00267852	0.0177742	4	3.72963	repr
WASF3	204042_at	10810	0.70751	0.0485042	0.163009	-3.01282	0.0015131	0.0114443	4	3.72033	repr
GPSN2	208336_s_at	9524	-1.65939	0.000702496	0.0190052	2.05857	0.00381808	0.0231195	1	3.71797	IND
AMPH	205257_s_at	273	-1.00579	0.0940221	0.242342	-2.71188	0.00883097	0.0426043	3	3.71767	repr
SH3BP5	201811_x_at	9467	1.41285	0.00415178	0.0420393	-2.30461	0.00548163	0.0302889	4	3.71745	repr
GPC4	204984_at	2239	0.99291	0.0756702	0.213376	-2.72235	3.18904e-18	3.20453e-15	4	3.71526	repr
AURKA	208079_s_at	6790	-1.76134	0.00819008	0.0605773	1.95273	0.00637879	0.0334839	1	3.71407	IND	AURKA
MYLIP	220319_s_at	29116	0.969687	0.0714252	0.206092	-2.73768	0.000125163	0.00162735	4	3.70737	repr
PFAS	213302_at	5198	-2.09095	0.00018252	0.0114732	1.60382	0.00267327	0.0177562	1	3.69478	IND	PFAS
NAMPT	217738_at	10135	1.34198	0.0692092	0.202925	-2.35215	0.00236116	0.0161538	4	3.69412	repr
ZYX	215706_x_at	7791	2.05816	0.00105761	0.0231752	1.63089	0.0203343	0.0788052	2	3.68904	IND
CENPE	205046_at	1062	-2.14117	0.025743	0.113173	1.54635	0.00938808	0.0446365	1	3.68752	IND
GULP1	204235_s_at	51454	0.817285	0.0856587	0.228835	-2.87022	1.72037e-07	7.20301e-06	4	3.68751	repr		GULP1
SMA5	215043_s_at	11042	-0.824403	0.0185158	0.0932063	2.85449	8.98854e-10	7.35179e-08	1	3.67889	IND
LTA4H	208771_s_at	4048	-1.37287	0.00271885	0.0363109	2.30534	0.00849045	0.041589	1	3.67821	IND
RRBP1	201206_s_at	6238	2.34532	0.000126435	0.0108146	-1.32823	0.022888	0.0853627	4	3.67355	repr
CELSR2	204029_at	1952	-0.77986	0.0190402	0.0945827	2.88065	0.000344871	0.00363876	1	3.66051	IND	CELSR2
EMP2	204975_at	2013	-1.13909	0.0269227	0.116209	-2.50798	0.00270652	0.0178901	3	3.64707	repr
ATP2B1	215716_s_at	490	2.26135	0.000191716	0.0116294	-1.37963	0.00529784	0.0296224	4	3.64097	repr
CIT	212801_at	11113	-2.32211	0.0032034	0.0382558	1.31492	0.0478352	0.145944	1	3.63704	IND
SIRPA	202897_at	140885	-1.58799	0.00135757	0.0264359	2.04559	0.0351048	0.117753	1	3.63358	IND	SIRPA
IL6ST	212195_at	3572	1.49047	0.00278239	0.0364365	-2.13854	0.00519523	0.0291959	4	3.62901	repr		IL6ST
KLF7	204334_at	8609	0.978774	0.00194963	0.0307483	-2.64809	4.25243e-06	0.000100039	4	3.62686	repr
ARTN	207675_x_at	9048	-0.681981	0.0490953	0.164133	2.93918	4.04884e-05	0.000662315	1	3.62116	IND
POLD3	212836_at	10714	-2.39858	0.000490394	0.0170891	1.20337	0.00798972	0.0398297	1	3.60195	IND	POLD3
MRP63	204386_s_at	78988	-1.46505	0.00342999	0.0394633	2.13644	3.22221e-05	0.000543525	1	3.60148	IND
GRK5	204395_s_at	2869	-2.03623	0.00158804	0.0280041	1.55988	0.00200136	0.0142516	1	3.59611	IND	GRK5		GRK5
USP13	205356_at	8975	-1.65505	0.000601101	0.0178795	1.93797	0.00373109	0.0227422	1	3.59302	IND
FAM46A	221766_s_at	55603	1.76586	0.0060087	0.0514175	-1.81864	0.0553052	0.162905	4	3.5845	repr
PROS1	207808_s_at	5627	0.859565	0.0359924	0.137774	-2.71958	6.89261e-05	0.00101428	4	3.57915	repr		PROS1
C8orf70	205308_at	51101	0.985531	0.002786	0.0364365	-2.59095	2.10542e-08	1.19432e-06	4	3.57648	repr
ITM2A	202747_s_at	9452	-1.30555	0.0180237	0.0922029	2.26556	0.00574279	0.0311801	1	3.57111	IND
IDH2	210046_s_at	3418	-0.927499	0.0034583	0.0396183	2.63746	0.00417684	0.0247722	1	3.56496	IND
OSBPL10	219073_s_at	114884	0.761513	0.0243741	0.109526	-2.79732	9.27534e-06	0.000190212	4	3.55883	repr
KLHL21	203068_at	9903	0.623309	0.0460728	0.157932	-2.92587	2.16459e-12	4.47816e-10	4	3.54918	repr
PLS3	201215_at	5358	0.561214	0.0422153	0.150596	-2.98101	0.00769385	0.0386838	4	3.54222	repr		PLS3
PDS5B	207956_x_at	23047	-1.12781	0.0346224	0.134698	2.40957	0.000288548	0.00313277	1	3.53738	IND
PHKA2	209439_s_at	5256	-0.984832	0.0105491	0.0683261	2.52433	4.89825e-09	3.41132e-07	1	3.50916	IND
CYP1B1	202436_s_at	1545	0.949233	0.0260216	0.113616	-2.55823	0.00902302	0.0433228	4	3.50746	repr
GPX7	213170_at	2882	-1.09694	0.00780304	0.0587132	2.40529	8.63629e-06	0.000179844	1	3.50224	IND
GYS1	201673_s_at	2997	-2.06117	0.000788185	0.020308	1.44	0.0346445	0.116593	1	3.50117	IND
NCAPG2	219588_s_at	54892	-2.21962	0.00142527	0.0268867	1.28043	0.0118892	0.0532667	1	3.50005	IND
TP53I3	210609_s_at	9540	0.623946	0.0466863	0.159104	-2.86752	3.11217e-08	1.59788e-06	4	3.49146	repr
MRPL22	218339_at	29093	-1.06251	0.00114739	0.0246299	2.42628	6.00624e-05	0.000910053	1	3.48879	IND
LDLR	202068_s_at	3949	0.889863	0.0262298	0.114242	-2.59776	0.0144036	0.0610802	4	3.48762	repr
DDAH2	214909_s_at	23564	1.81408	0.00248937	0.0347425	-1.67213	0.000591613	0.00557101	4	3.4862	repr
CTSA	200661_at	5476	1.69061	0.000103874	0.0101479	-1.79401	0.0326704	0.111827	4	3.48462	repr
SQSTM1	201471_s_at	8878	1.72636	0.00269744	0.0363109	-1.75359	7.89871e-05	0.0011179	4	3.47995	repr
EHD2	221870_at	30846	0.881642	0.0340687	0.13343	-2.59043	0.000299994	0.00323644	4	3.47207	repr
NRD1	208709_s_at	4898	-1.50535	0.0271599	0.116632	1.96393	0.000138464	0.00176441	1	3.46928	IND
CENPF	209172_s_at	1063	-1.68915	0.0134076	0.0786565	1.77925	0.000104361	0.00140898	1	3.4684	IND
UST	205139_s_at	10090	0.897155	0.0595209	0.185499	-2.56833	1.14986e-11	2.03111e-09	4	3.46548	repr
PLSCR4	218901_at	57088	1.76979	0.0172285	0.0903065	-1.69561	0.044232	0.138896	4	3.46539	repr
NEK2	204641_at	4751	-1.67626	0.00922233	0.0642524	1.78785	0.014169	0.0603663	1	3.46411	IND
LEPROT	202377_at	54741	1.12235	0.0014164	0.0268867	-2.33939	0.00402169	0.0240959	4	3.46175	repr
FAM111A	218248_at	63901	-1.55352	0.100977	0.253577	1.9032	0.00765415	0.0385392	1	3.45672	IND
LOC26010	222154_s_at	26010	1.1431	0.00369512	0.040867	-2.31176	0.0099692	0.0466581	4	3.45486	repr
MTHFD1	202309_at	4522	-1.75253	4.11372e-05	0.00923861	1.69848	0.0035237	0.0218505	1	3.45101	IND	MTHFD1
RUVBL1	201614_s_at	8607	-1.59787	0.000180568	0.0114732	1.85264	3.08955e-06	7.65207e-05	1	3.45051	IND
PTPRF	200637_s_at	5792	-1.88877	0.0311881	0.126224	1.55993	0.0446044	0.139505	1	3.4487	IND
TIMP2	203167_at	7077	1.25292	0.00985657	0.0663456	-2.19388	0.00385861	0.0233174	4	3.4468	repr
IVNS1ABP	201362_at	10625	-0.980766	0.00218317	0.0321264	2.45806	0.000548538	0.0052567	1	3.43882	IND	IVNS1ABP
CHSY1	203044_at	22856	1.49656	0.0015817	0.0280041	-1.94208	0.00551431	0.0303743	4	3.43864	repr
PDLIM2	219165_at	64236	0.988203	0.0138069	0.0794746	-2.44275	0.00131017	0.0103304	4	3.43095	repr
STK32B	219686_at	55351	-1.49481	0.0984973	0.249758	1.92941	0.000355461	0.00371754	1	3.42422	IND	STK32B
KIF18B	222039_at	146909	-2.04091	0.00298555	0.0371688	1.3816	0.0129755	0.0567597	1	3.42251	IND
PLXNA1	221538_s_at	5361	0.905544	0.0528127	0.171214	-2.51507	8.00766e-06	0.000170169	4	3.42062	repr
DUSP1	201041_s_at	1843	0.869878	0.0779543	0.21656	-2.54598	0.0246441	0.0905676	4	3.41586	repr
BAT2	212081_x_at	7916	-0.513245	0.0558006	0.177464	2.90261	7.65622e-08	3.54302e-06	1	3.41586	IND
SUCLG2	215772_x_at	8801	-1.23894	0.0114477	0.0711966	-2.17409	0.0014067	0.0108257	3	3.41303	repr
IER5	218611_at	51278	0.704215	0.0292854	0.122034	-2.70123	0.00263419	0.0175131	4	3.40545	repr
CDR2	209501_at	1039	1.01042	0.0224339	0.103884	-2.39002	1.87513e-06	5.01507e-05	4	3.40044	repr
PRR3	204795_at	80742	-1.56262	0.00147046	0.027219	1.8375	6.64819e-05	0.000990749	1	3.40012	IND			PRR3
HAP1	211222_s_at	9001	-1.52618	0.0350628	0.135716	1.87294	0.00549018	0.0303123	1	3.39913	IND	HAP1
ENPP1	205066_s_at	5167	-1.26339	0.0230626	0.105523	2.1354	0.00299553	0.0193486	1	3.39879	IND
GSTM2	204418_x_at	2946	-1.63764	0.0110079	0.0701355	1.75962	0.00463217	0.026751	1	3.39726	IND	GSTM2
MSH6	211450_s_at	2956	-1.77774	0.000518676	0.0171355	1.61613	0.017248	0.0696857	1	3.39387	IND	MSH6
PXMP2	219076_s_at	5827	-1.58481	0.000828332	0.0208089	1.80465	0.00144065	0.0109908	1	3.38946	IND	PXMP2
GSTM1	204550_x_at	2944	-1.74035	0.00317257	0.038212	1.61609	0.00357055	0.0220309	1	3.35644	IND	GSTM1
LOC389168	215780_s_at	389168	-1.0151	0.00230544	0.0331625	2.34111	0.00256841	0.0172248	1	3.35621	IND
STX3	209238_at	6809	2.24263	0.000440639	0.0165746	-1.10282	0.0328119	0.112202	4	3.34545	repr
FANCG	203564_at	2189	-2.35473	0.00148606	0.0273637	0.987896	0.0583099	0.169344	1	3.34263	IND
GP1BB	206655_s_at	2812	-0.874591	0.0111801	0.0704626	2.46606	0.00104987	0.00864728	1	3.34065	IND
AGBL5	218480_at	60509	-1.09455	0.00186785	0.0299729	2.24537	0.000453465	0.0044925	1	3.33992	IND
NID1	202007_at	4811	1.1282	0.0104686	0.0680809	-2.20857	0.0125514	0.0553522	4	3.33677	repr
RAD54B	219494_at	25788	-1.9337	0.00861154	0.0617497	1.40158	0.000980653	0.00815356	1	3.33529	IND	RAD54B
ARRB2	203388_at	409	-1.9943	4.46279e-05	0.00951251	1.33713	0.087618	0.225011	1	3.33143	IND
DNAJB4	203810_at	11080	2.20969	0.00098855	0.0225031	-1.11873	0.00319147	0.0203613	4	3.32841	repr
DHRS7	210788_s_at	51635	1.31682	0.0192995	0.0951548	-2.01153	0.00670643	0.0348397	4	3.32835	repr
RIPK4	221215_s_at	54101	-1.72227	0.0604718	0.187465	1.603	0.0244444	0.0899278	1	3.32527	IND
CAMK1G	215161_at	57172	-1.24213	0.0242071	0.109038	2.08164	0.00124343	0.00996158	1	3.32376	IND
NEB	205054_at	4703	0.765164	0.0951438	0.244487	2.55649	0.0457275	0.141632	2	3.32165	IND
NDST4	208334_at	64579	-1.75388	0.00780935	0.0587132	1.56445	0.0013916	0.0107448	1	3.31832	IND
GGH	203560_at	8836	-0.866489	0.00893126	0.0632643	2.44886	4.16311e-05	0.000674731	1	3.31535	IND
HSD17B8	213540_at	7923	-1.83582	0.0125334	0.075609	1.46987	0.0111333	0.0506234	1	3.3057	IND
COG7	213190_at	91949	-1.45804	0.00320192	0.0382558	1.84612	6.65343e-06	0.000147171	1	3.30417	IND
OSBPL1A	209485_s_at	114876	0.801894	0.0307575	0.125347	-2.49639	0.00218374	0.0151483	4	3.29828	repr
ST5	202440_s_at	6764	1.71882	0.00458718	0.0442003	-1.57772	0.00413492	0.0245858	4	3.29654	repr
CTPS	202613_at	1503	-1.95279	7.44982e-05	0.00991172	1.33939	0.0238975	0.0884558	1	3.29218	IND	CTPS
DHFR	202534_x_at	1719	-2.12889	6.29993e-05	0.00991172	1.16129	0.0291568	0.102598	1	3.29018	IND
LSM4	202736_s_at	25804	-1.12364	0.0010529	0.0231752	2.16221	0.00422217	0.0248942	1	3.28585	IND	LSM4
HOXD11	214604_at	3237	-0.678144	0.0575292	0.181307	2.60623	7.23348e-09	4.84574e-07	1	3.28437	IND
ZEB1	212764_at	6935	1.08942	0.0276155	0.11794	-2.19466	0.00276853	0.0181659	4	3.28407	repr
HRSP12	203790_s_at	10247	-1.41333	0.00213535	0.0318422	1.87013	0.0134098	0.0580319	1	3.28346	IND	HRSP12
ZDHHC4	220261_s_at	55146	-1.1202	0.0052725	0.0474255	2.16048	0.000422161	0.00425427	1	3.28068	IND
RREB1	203704_s_at	6239	-0.481421	0.0701614	0.204439	2.79049	0.000246021	0.00276439	1	3.27191	IND
GUSBP1	214850_at	153561	-0.467675	0.096524	0.245996	2.80385	4.89269e-10	4.4122e-08	1	3.27153	IND
TOB1	202704_at	10140	0.68451	0.016042	0.0865111	-2.58259	0.00117577	0.0095281	4	3.2671	repr
MTMR9	204837_at	66036	2.02482	0.00282943	0.036585	-1.23496	0.0333588	0.11341	4	3.25977	repr			MTMR9
CARHSP1	218384_at	23589	-1.36634	0.00130124	0.0259803	1.8889	6.93305e-05	0.00101658	1	3.25525	IND
SSH1	221752_at	54434	-0.762002	0.0804638	0.22126	2.47521	1.03124e-06	3.08669e-05	1	3.23721	IND	SSH1
TM4SF1	209386_at	4071	1.38978	0.0082941	0.0607716	-1.84033	0.0514435	0.154177	4	3.23011	repr
RNF219	219303_at	79596	-1.68254	0.00256698	0.0353566	1.54174	0.00177446	0.0129165	1	3.22428	IND
TXNIP	201009_s_at	10628	1.40004	0.00136051	0.0264359	-1.81923	0.0722738	0.19674	4	3.21927	repr
OSTM1	218196_at	28962	1.06275	0.00289729	0.0368502	-2.1518	2.68033e-06	6.80629e-05	4	3.21455	repr
TRIO	209012_at	7204	1.12517	0.00860576	0.0617497	-2.08872	6.35162e-09	4.29589e-07	4	3.2139	repr		TRIO
ADAM9	202381_at	8754	0.998288	0.00307319	0.037727	-2.21516	0.000715375	0.00641012	4	3.21345	repr
BMPR2	209920_at	659	1.25878	0.00548665	0.048658	-1.95008	5.18624e-06	0.000117677	4	3.20886	repr
RRAS	212647_at	6237	-0.530973	0.0982776	0.249471	-2.67685	0.000281279	0.00309143	3	3.20782	repr
SLC25A11	209003_at	8402	-1.72104	0.000928011	0.0215433	1.48522	0.0227586	0.0851023	1	3.20626	IND
ISYNA1	222240_s_at	51477	-1.57011	0.0173969	0.0906972	1.63069	0.0203042	0.0787947	1	3.20079	IND
UNG	202330_s_at	7374	-1.51434	0.00104209	0.0231231	1.68241	7.58929e-05	0.00108689	1	3.19675	IND
MAP2K3	215498_s_at	5606	0.881425	0.0415265	0.149489	-2.31116	0.0147859	0.0619809	4	3.19259	repr
WIPI1	203827_at	55062	1.09663	0.00808377	0.0600435	-2.0947	9.19994e-06	0.000189772	4	3.19133	repr
SMC4	201663_s_at	10051	-1.38655	0.0170832	0.0901529	1.80415	0.0410718	0.131828	1	3.1907	IND	SMC4
COX7C	213846_at	1350	-0.757643	0.0192207	0.0951548	2.4325	5.32114e-05	0.000823	1	3.19014	IND
ECT2	219787_s_at	1894	-1.62899	0.00597623	0.051208	1.55752	0.00062015	0.0057548	1	3.18651	IND	ECT2
ANXA2P2	208816_x_at	304	1.35134	0.00362676	0.0405574	-1.83392	0.000117281	0.00154348	4	3.18526	repr
MRS2	218536_at	57380	-1.49497	0.000671024	0.0185097	1.68747	1.16967e-05	0.00023507	1	3.18244	IND
ANXA2	213503_x_at	302	1.24927	0.00105618	0.0231752	-1.93173	0.0473837	0.144913	4	3.181	repr
TMSL8	205347_s_at	11013	-1.50422	0.0268937	0.116198	1.67671	0.0138112	0.0592006	1	3.18093	IND
PLOD2	202620_s_at	5352	1.29667	0.00141518	0.0268867	-1.88108	0.0433956	0.136758	4	3.17775	repr
CTNNAL1	202468_s_at	8727	-0.728494	0.0331754	0.131025	-2.44745	0.00637558	0.0334839	3	3.17595	repr
SPAG5	203145_at	10615	-2.08587	0.00284585	0.0366995	1.08727	0.0320998	0.110195	1	3.17314	IND	SPAG5
MCM6	201930_at	4175	-1.66066	0.000235795	0.0127298	1.51044	0.0406712	0.13099	1	3.1711	IND
WDR12	218512_at	55759	-1.24172	0.0120899	0.073692	1.92687	0.000701879	0.00633358	1	3.16859	IND	WDR12
AHCY	200903_s_at	191	-1.06752	0.00128224	0.0257338	2.09894	0.0178058	0.0714565	1	3.16646	IND	AHCY
TAF9B	221618_s_at	51616	-2.09292	0.000353498	0.0153488	1.06229	0.00569683	0.0311114	1	3.15521	IND
NUP85	218014_at	79902	-1.45537	0.00163215	0.0283182	1.69594	0.00578283	0.0312896	1	3.1513	IND	NUP85
PLAU	211668_s_at	5328	0.834176	0.0171893	0.0902986	-2.31521	2.60118e-06	6.62925e-05	4	3.14939	repr		PLAU
EGFL7	218825_at	51162	-1.4204	0.000410214	0.0162104	1.72413	0.0026971	0.0178807	1	3.14453	IND
CPVL	208146_s_at	54504	-0.711667	0.0504285	0.167082	2.42975	0.00479965	0.0274701	1	3.14142	IND	CPVL
DSTN	201022_s_at	11034	1.31021	0.00446789	0.0436332	-1.82726	0.00634435	0.0334028	4	3.13747	repr
PGAP1	213469_at	80055	-0.806637	0.0284578	0.11972	2.33074	7.86083e-06	0.000168075	1	3.13738	IND
MDK	209035_at	4192	1.28572	0.00334469	0.0390807	1.85101	0.00634913	0.033403	2	3.13672	IND		MDK
PDGFC	218718_at	56034	1.11646	0.0437994	0.153976	-2.01652	0.0182876	0.0727985	4	3.13298	repr
TH1L	220607_x_at	51497	-0.642783	0.0207352	0.0990165	2.48923	0.00109143	0.00897911	1	3.13201	IND	TH1L
TSPYL2	218012_at	64061	1.19447	0.00278171	0.0364365	1.93716	0.0147413	0.0619416	2	3.13163	IND
ITGAV	202351_at	3685	1.5328	0.00324285	0.0385307	-1.59698	0.0208244	0.0798738	4	3.12977	repr
ZNF232	219123_at	7775	-0.93257	0.0751691	0.21243	2.1929	5.69991e-08	2.76504e-06	1	3.12547	IND	ZNF232
NMI	203964_at	9111	-1.28647	0.0153428	0.0846443	1.83842	0.0486772	0.148031	1	3.12489	IND	NMI
RHOQ	212117_at	23433	1.54601	9.50799e-05	0.00991172	-1.57386	0.00531225	0.0296324	4	3.11987	repr
CDC7	204510_at	8317	-1.41074	0.00298551	0.0371688	1.70683	0.00316319	0.0202088	1	3.11756	IND	CDC7
RFC3	204127_at	5983	-1.92699	0.00114851	0.0246299	1.18618	0.0491204	0.149121	1	3.11317	IND	RFC3
TMEM9B	218065_s_at	56674	1.44174	0.00205398	0.03134	-1.67014	0.000340613	0.00360282	4	3.11188	repr
APBB2	213419_at	323	-0.825608	0.066	0.197719	-2.28283	4.64831e-10	4.32462e-08	3	3.10844	repr		APBB2
CREB3L2	212345_s_at	64764	1.34783	0.00130697	0.0259803	-1.76007	0.0241833	0.0892942	4	3.10789	repr		CREB3L2
MRPL23	213897_s_at	6150	-1.23397	0.00292984	0.0369328	1.87173	0.00258138	0.0172763	1	3.1057	IND
RBM10	215089_s_at	8241	-0.464148	0.0902738	0.236535	2.63801	3.0116e-05	0.000514165	1	3.10216	IND
SSRP1	200956_s_at	6749	-1.10046	0.000915603	0.0214678	1.99471	0.00207808	0.0146318	1	3.09517	IND	SSRP1
LSM8	219119_at	51691	-1.00688	0.0136297	0.0792979	2.08258	0.000613589	0.00572412	1	3.08947	IND
RCN1	201063_at	5954	1.29763	0.00123005	0.0253071	-1.78772	0.00801423	0.0398953	4	3.08535	repr
XAGE1D	220057_at	9503	-1.94764	0.000227253	0.0126629	1.13627	0.0275208	0.0977168	1	3.08391	IND
FAM64A	221591_s_at	54478	-1.9387	0.0228854	0.105068	1.14418	0.0236429	0.0877132	1	3.08288	IND
TIMELESS	203046_s_at	8914	-1.68732	0.00286789	0.0366995	1.39529	0.00128173	0.0101987	1	3.08261	IND	TIMELESS
GEMIN6	219539_at	79833	-1.853	0.000128127	0.0108146	1.22777	0.0118839	0.0532667	1	3.08077	IND
PAICS	201014_s_at	10606	-1.18975	0.00395227	0.0419118	1.88747	0.0140262	0.0599395	1	3.07721	IND	PAICS
PIP4K2A	212829_at	5305	0.842696	0.00834246	0.0609355	-2.23425	0.0279065	0.0989385	4	3.07695	repr
KLF6	208961_s_at	1316	0.883067	0.0699936	0.204288	-2.18619	0.0265012	0.0951553	4	3.06925	repr
MAD2L1	203362_s_at	4085	-1.47722	0.00896112	0.0633016	1.59159	0.0154134	0.0642288	1	3.06881	IND
TUBG1	201714_at	7283	-1.46442	0.0010661	0.0232167	1.60025	0.0559702	0.164519	1	3.06467	IND
SCLY	221575_at	51540	-2.00066	8.72101e-05	0.00991172	1.06273	0.0025909	0.0173071	1	3.06339	IND			SCLY
NOL5A	200875_s_at	10528	-1.18318	0.000477955	0.0170891	1.86967	0.00258132	0.0172763	1	3.05285	IND	NOL5A
THTPA	218540_at	79178	-1.17421	0.0117324	0.0724545	1.8768	7.06906e-05	0.00103161	1	3.05101	IND
IGFBP2	202718_at	3485	1.17825	0.04222	0.150596	1.87149	0.0591639	0.171188	2	3.04975	IND
CHAC1	219270_at	79094	1.62474	0.108778	0.263661	-1.42018	0.00215205	0.0149783	4	3.04492	repr
STXBP2	209367_at	6813	-1.47876	0.000735288	0.0194437	1.56482	0.0220577	0.0833263	1	3.04358	IND
KIAA0391	202713_s_at	9692	-1.43528	0.00370734	0.0408737	1.60493	0.00826622	0.0407746	1	3.0402	IND
LAMP2	203041_s_at	3920	1.41935	0.00279225	0.0364365	-1.61611	0.0149201	0.062469	4	3.03545	repr
BGLAP	206956_at	632	-1.299	0.00442305	0.0435052	1.73568	2.9953e-05	0.000514118	1	3.03469	IND	BGLAP
FJX1	219522_at	24147	1.97251	0.0149164	0.0830661	-1.06037	0.00995566	0.0466581	4	3.03288	repr
DDX12	213378_s_at	440081	-1.74206	0.00012363	0.0108146	1.29013	0.0261962	0.0945916	1	3.03219	IND
ZNF292	212368_at	23036	0.707585	0.00936344	0.0647956	2.32034	6.55687e-05	0.000984652	2	3.02793	IND
TCF7L1	221016_s_at	83439	1.29113	0.00886999	0.0629014	-1.734	0.000220029	0.00254553	4	3.02513	repr
GEMIN4	205527_s_at	50628	-1.75299	0.000208615	0.0120282	1.26585	0.0140954	0.0601254	1	3.01885	IND
HMGB3	203744_at	3149	-0.95435	0.0356083	0.137093	2.04953	0.00111431	0.00911398	1	3.00388	IND	HMGB3
ALDH1L1	205208_at	10840	-0.859054	0.0838663	0.226289	2.12255	0.00166652	0.0123515	1	2.98161	IND
ATIC	208758_at	471	-1.07035	0.00394027	0.0419118	1.89361	0.0259455	0.0940115	1	2.96396	IND
SEC23A	204344_s_at	10484	1.44587	0.00131832	0.0261213	-1.51346	0.000678262	0.00618793	4	2.95933	repr		SEC23A
SLC25A15	218653_at	10166	-1.04648	0.0293822	0.122125	1.90856	0.00358827	0.0220729	1	2.95504	IND
IFT122	220744_s_at	55764	-1.40551	0.015578	0.0853527	1.5488	0.0445075	0.13944	1	2.95432	IND
SH3GLB1	209090_s_at	51100	1.24655	0.00202726	0.031203	-1.70705	0.0144145	0.0610802	4	2.9536	repr		SH3GLB1
LOXL1	203570_at	4016	0.942215	0.0245082	0.109526	-2.00689	0.0289001	0.101951	4	2.9491	repr
GRINA	212090_at	2907	0.890831	0.0052397	0.047379	2.05697	0.000544655	0.00524091	2	2.94781	IND
RAD51AP1	204146_at	10635	-1.72485	0.000489573	0.0170891	1.21173	0.0100428	0.0468755	1	2.93658	IND	RAD51AP1
AES	217729_s_at	166	-0.554849	0.0388596	0.143821	2.38039	7.82992e-05	0.00111264	1	2.93523	IND
SMG1	211996_s_at	23049	0.69652	0.0716802	0.206558	2.23832	0.000225119	0.00257897	2	2.93484	IND
THYN1	218491_s_at	29087	-1.7764	0.000591144	0.0178795	1.15535	0.0222543	0.0837543	1	2.93175	IND			THYN1
JAK1	201648_at	3716	-0.954189	0.0222278	0.103338	1.97586	0.0122141	0.0542729	1	2.93005	IND	JAK1
MSL-1	212708_at	339287	-1.85441	0.00858557	0.0617497	1.07439	0.0933035	0.234475	1	2.9288	IND
GOLT1B	218193_s_at	51026	1.3832	0.00322833	0.0384232	-1.54525	1.23217e-06	3.61128e-05	4	2.92845	repr		GOLT1B
HMBS	203040_s_at	3145	-1.62003	0.000811494	0.0206813	1.30138	0.0775654	0.2069	1	2.92141	IND
PKD2	203688_at	5311	0.777416	0.0733031	0.209471	-2.13805	2.07165e-10	2.24185e-08	4	2.91546	repr
MLLT3	204918_s_at	4300	-1.65468	0.00760384	0.0581589	1.25864	0.00446252	0.0260276	1	2.91332	IND
GRB10	209409_at	2887	0.632993	0.0617739	0.189994	-2.27384	0.00715731	0.0366408	4	2.90683	repr			GRB10
RRAGC	218088_s_at	64121	1.29047	0.000392683	0.016054	-1.61402	0.0128702	0.0564396	4	2.90449	repr
FOXD1	206307_s_at	2297	1.28252	0.0285336	0.119881	-1.62025	4.27636e-05	0.000688328	4	2.90277	repr
ADCK2	221893_s_at	90956	-1.08535	0.011418	0.0711966	1.8139	1.54399e-06	4.27575e-05	1	2.89925	IND
TBCD	211052_s_at	6904	-1.42535	0.00122286	0.0253071	1.4726	0.000810013	0.0070492	1	2.89794	IND
STCH	202558_s_at	6782	1.28992	0.00863829	0.0617497	-1.60781	4.53466e-08	2.26218e-06	4	2.89773	repr		STCH
DEAF1	209407_s_at	10522	-1.18266	0.00182986	0.0298637	1.71353	0.00240337	0.0163494	1	2.89619	IND
HYOU1	200825_s_at	10525	1.35133	0.00506573	0.0468847	1.54448	0.0203469	0.0788105	2	2.89582	IND
ABCB6	203192_at	10058	-1.42706	0.046538	0.15883	1.46808	0.000351534	0.00368508	1	2.89514	IND	ABCB6
PSRC1	201896_s_at	84722	-1.44194	0.0509733	0.168029	1.44994	0.0127897	0.0561914	1	2.89188	IND	PSRC1
ZNF91	206059_at	7644	0.664773	0.0414376	0.149402	2.219	0.00137622	0.0107083	2	2.88378	IND
LOC643246	208785_s_at	643246	1.54249	0.000537471	0.0173421	-1.34098	0.0114692	0.0517805	4	2.88348	repr
LMNA	212086_x_at	4000	1.63613	0.00213193	0.0318422	-1.24109	0.0294578	0.103396	4	2.87721	repr
ANGEL2	221826_at	90806	-1.5454	0.000658094	0.0184424	-1.33133	4.77727e-06	0.000110537	3	2.87673	repr
MT1G	204745_x_at	4495	0.988026	0.00209949	0.0315552	-1.88424	0.0164301	0.0671134	4	2.87226	repr
HMGB1	200679_x_at	3146	-1.28382	0.00368585	0.0408287	1.58279	0.00310171	0.0199428	1	2.86661	IND
GINS2	221521_s_at	51659	-1.78263	0.0031078	0.037845	1.0831	0.0757069	0.203408	1	2.86572	IND
DNAJC16	212908_at	23341	1.15476	0.0186354	0.0933628	1.70922	0.000140798	0.0017836	2	2.86399	IND
CLEC3B	212627_s_at	7123	-1.08038	0.00321827	0.0383683	1.77938	0.000238221	0.00270702	1	2.85976	IND
NFKBIA	201502_s_at	4792	-0.491803	0.0438501	0.154037	-2.36662	0.00614356	0.0326882	3	2.85842	repr
NBL1	201621_at	4681	1.55613	0.00243772	0.0345704	-1.30114	0.0611765	0.175121	4	2.85728	repr
GSTM3	202554_s_at	2947	-0.594769	0.0202318	0.097406	2.25996	0.029755	0.104283	1	2.85472	IND
NCAPD3	212789_at	23310	-1.21365	0.00373885	0.0409333	1.63924	0.00575271	0.0311801	1	2.85289	IND
TRIP13	204033_at	9319	-1.80654	0.015208	0.0841647	1.04633	0.092018	0.232407	1	2.85287	IND
MBD3	41160_at	53615	-0.555404	0.0378774	0.141643	2.29615	2.54148e-06	6.50063e-05	1	2.85156	IND
KIAA0913	212359_s_at	23053	1.15843	0.0201917	0.0973463	1.68863	0.00015551	0.00193262	2	2.84706	IND
STAM	203544_s_at	8027	1.04529	0.0027641	0.0364365	-1.7998	0.000413407	0.00419053	4	2.84509	repr
PDE9A	205593_s_at	5152	-1.0356	0.0136745	0.0794274	1.80646	0.000168576	0.00206219	1	2.84205	IND
EIF2AK3	218696_at	9451	1.17628	0.00297306	0.0371447	-1.66565	0.00017428	0.00211796	4	2.84193	repr
AKAP8L	218064_s_at	26993	0.993293	0.00211968	0.0317907	1.84833	0.000153496	0.00191435	2	2.84163	IND	AKAP8L
RFX5	202963_at	5993	-1.48029	0.00148197	0.0273601	1.35416	0.0786715	0.209057	1	2.83445	IND
ARHGAP4	204425_at	393	-0.93506	0.0195069	0.0955443	1.893	0.00313618	0.0200831	1	2.82806	IND
PARP1	208644_at	142	-0.811849	0.0183001	0.0928228	2.0118	5.03443e-05	0.000792218	1	2.82365	IND			PARP1
STK17A	202693_s_at	9263	0.716477	0.0480126	0.162132	-2.10669	0.00355772	0.0219903	4	2.82317	repr
PNKP	218961_s_at	11284	-0.900098	0.0709018	0.205829	1.92296	5.2711e-05	0.000819085	1	2.82306	IND
C14orf169	219526_at	79697	-1.31787	0.000718431	0.0192262	1.50226	0.00028104	0.00309143	1	2.82014	IND
CSE1L	201112_s_at	1434	-1.38273	0.00186434	0.0299729	1.43648	0.0389871	0.127137	1	2.81921	IND	CSE1L
VGLL4	214004_s_at	9686	1.50804	0.000494862	0.0170891	1.30081	0.00468871	0.0269668	2	2.80885	IND
PAPPA	201982_s_at	5069	-1.28586	0.0594551	0.185376	1.52057	0.059538	0.1718	1	2.80642	IND
SIPA1L1	202254_at	26037	-1.0507	0.0425215	0.151402	1.75564	0.02004	0.078175	1	2.80634	IND
IL1RAP	205227_at	3556	-1.58162	0.00396878	0.0419118	1.22382	9.39845e-05	0.00128867	1	2.80544	IND	IL1RAP
MRPS27	212145_at	23107	-1.49996	0.000266363	0.0135768	1.30497	0.0369632	0.122452	1	2.80493	IND	MRPS27
PDE4DIP	205872_x_at	9659	-1.24094	0.167006	0.339319	1.56167	0.0828371	0.216287	1	2.80261	IND
RBMS3	206767_at	27303	0.981806	0.0176836	0.0912591	-1.81626	6.96269e-06	0.000152572	4	2.79807	repr
CREB3L1	213059_at	90993	1.13693	0.0035385	0.0399515	-1.65887	0.00223463	0.0154404	4	2.7958	repr
C1orf103	220235_s_at	55791	1.3713	0.00312057	0.037845	1.41955	0.00230189	0.0158275	2	2.79085	IND
POU3F2	207084_at	5454	-1.50409	0.0146756	0.0822884	1.27875	0.00709208	0.0363383	1	2.78284	IND
RP6-213H19.1	218499_at	51765	-0.57062	0.0517213	0.169845	-2.20436	0.00527136	0.0294978	3	2.77498	repr
CAPRIN1	200722_s_at	4076	-0.915877	0.0094862	0.0649717	1.85749	0.00839287	0.0411907	1	2.77337	IND
PRDX2	39729_at	7001	-0.722175	0.0259702	0.113594	2.05105	0.013706	0.058965	1	2.77322	IND
NUP205	212247_at	23165	-1.32354	0.00100224	0.0225983	1.44591	0.00143689	0.010974	1	2.76945	IND	NUP205
BLOC1S1	202592_at	2647	-0.841465	0.0326831	0.129972	1.92631	1.95528e-07	7.99617e-06	1	2.76777	IND
MANBA	203778_at	4126	1.1082	0.00958471	0.0654247	-1.65377	0.000204702	0.00240017	4	2.76197	repr		MANBA
CCDC90A	220094_s_at	63933	-0.937061	0.00350508	0.0397657	1.82143	0.0070562	0.0362023	1	2.75849	IND
SLC23A2	209236_at	9962	-1.10961	0.0192313	0.0951548	1.64245	0.0141943	0.0604376	1	2.75205	IND
CEP55	218542_at	55165	-1.82047	0.0418723	0.15027	0.929098	0.0769661	0.205983	1	2.74957	IND	CEP55
OGDHL	219277_s_at	55753	-0.730755	0.0684769	0.201903	2.01298	0.0226162	0.0846938	1	2.74373	IND
ADA	216705_s_at	100	-1.13425	0.00750738	0.0577756	-1.60759	0.0300955	0.105267	3	2.74184	repr
ADAM19	209765_at	8728	1.54315	0.0318736	0.128085	-1.1978	0.0997854	0.246105	4	2.74094	repr		ADAM19
SFRS2	200753_x_at	6427	-1.51987	0.00154036	0.0278125	1.21825	0.0343649	0.115823	1	2.73812	IND
DNAJB1	200666_s_at	3337	0.969081	0.0209142	0.0996011	-1.76358	0.0101157	0.0471215	4	2.73266	repr
PBX2	202875_s_at	5089	-1.27849	0.0458429	0.157682	1.45004	0.000959879	0.00801877	1	2.72853	IND	PBX2
MAP1LC3B	208786_s_at	81631	1.73369	0.00015561	0.0114732	-0.992714	0.0443651	0.139128	4	2.7264	repr
POLD1	203422_at	5424	-1.8437	4.14308e-05	0.00923861	0.879331	0.0319658	0.110147	1	2.72304	IND
SCAP	212329_at	22937	-0.594672	0.0305671	0.124949	2.12744	0.00138995	0.0107448	1	2.72211	IND
GGA2	208914_at	23062	-1.46232	0.00721596	0.0566348	1.25908	0.036976	0.122452	1	2.7214	IND	GGA2
BTG2	201236_s_at	7832	-0.799803	0.0895639	0.23516	-1.92066	0.0187414	0.0741149	3	2.72046	repr
SPTAN1	208611_s_at	6709	0.948967	0.0501791	0.166464	1.76968	0.0376235	0.124059	2	2.71865	IND
PGF	209652_s_at	5228	1.547	0.00525491	0.0474182	-1.17156	0.00871193	0.0422328	4	2.71856	repr		PGF
MRC2	37408_at	9902	0.758194	0.0138005	0.0794746	-1.95546	0.00165857	0.0123063	4	2.71366	repr
MACROD1	219188_s_at	28992	-1.58652	0.048339	0.162795	1.12669	0.0855501	0.221154	1	2.71321	IND
HOXC10	218959_at	3226	1.10505	0.024241	0.109038	1.60801	0.0174131	0.070312	2	2.71306	IND
C11orf51	204218_at	25906	-1.1383	0.0108825	0.0696522	1.57287	9.47205e-05	0.00129372	1	2.71117	IND
F2R	203989_x_at	2149	1.63937	0.00616016	0.05208	1.06833	0.0295701	0.103739	2	2.7077	IND			F2R
CNOT7	218250_s_at	29883	-0.834093	0.00411296	0.0420262	1.87124	0.00643592	0.0337083	1	2.70533	IND
MRPL15	218027_at	29088	-0.475748	0.0528453	0.171218	2.22778	0.00136094	0.0106247	1	2.70353	IND
FUBP1	214093_s_at	8880	-0.756103	0.0252831	0.111569	1.94589	0.00256878	0.0172248	1	2.70199	IND
PCCB	212694_s_at	5096	-1.19109	0.000718864	0.0192262	1.5096	0.0108079	0.0495261	1	2.70068	IND
QTRT1	221270_s_at	81890	-1.19157	0.00123214	0.0253071	1.50635	0.00202936	0.0143751	1	2.69792	IND
TSC22D2	204094_s_at	9819	1.36215	0.0017266	0.0288478	-1.33532	0.0130177	0.0568381	4	2.69748	repr
ZNF692	220661_s_at	55657	-0.687449	0.0244297	0.109526	2.00795	9.00268e-05	0.00124655	1	2.6954	IND
COASY	201913_s_at	80347	-0.934663	0.00356953	0.04006	1.74633	4.25115e-05	0.000687415	1	2.68099	IND
EPB41L3	211776_s_at	23136	0.706356	0.0457166	0.157401	-1.97034	0.00531051	0.0296324	4	2.6767	repr			EPB41L3
PRMT1	206445_s_at	3276	-1.18318	0.00398393	0.0419118	1.49324	0.0591079	0.171097	1	2.67643	IND	PRMT1
ACVR1	203935_at	90	0.65621	0.0376625	0.141139	-2.01967	7.31956e-08	3.40965e-06	4	2.67588	repr
OAS3	218400_at	4940	-0.928244	0.0670424	0.199398	1.74741	5.27503e-05	0.000819085	1	2.67565	IND
CLIP1	201975_at	6249	1.14121	0.0119565	0.0730053	-1.53121	2.665e-05	0.000474572	4	2.67242	repr
KIAA1462	213316_at	57608	-1.45192	0.0449601	0.15574	1.21979	0.0132449	0.0575446	1	2.67171	IND
RSBN1	213694_at	54665	-0.757269	0.0851191	0.228261	1.91372	0.000368891	0.00382148	1	2.67099	IND	RSBN1
FASTKD1	219002_at	79675	-0.754473	0.0162158	0.0871366	1.90952	0.000287747	0.00313277	1	2.66399	IND
POLRMT	203782_s_at	5442	-0.611241	0.0446383	0.155081	2.05156	0.00589731	0.0316896	1	2.6628	IND
GOLIM4	204324_s_at	27333	0.773742	0.0248736	0.110327	-1.88591	8.59145e-08	3.94982e-06	4	2.65966	repr
POLR3K	218866_s_at	51728	-0.9696	0.00505328	0.0468732	1.68894	0.00135533	0.0106096	1	2.65854	IND
CCNB1IP1	217988_at	57820	-0.631008	0.0280774	0.118974	2.02257	0.00217056	0.0150718	1	2.65358	IND
MRPS34	218112_at	65993	-1.20934	0.000523197	0.0171355	1.44419	0.000567482	0.00540877	1	2.65353	IND
DIMT1L	210802_s_at	27292	-1.57143	0.00146875	0.027219	-1.07511	0.00221156	0.0153111	3	2.64654	repr	DIMT1L
TGS1	219231_at	96764	-1.55186	0.00142957	0.0268867	1.09369	0.00833223	0.0409852	1	2.64555	IND
FOSL2	218880_at	2355	1.04521	0.00241211	0.0343458	-1.59955	0.0115378	0.0519569	4	2.64476	repr		FOSL2
LMNB1	203276_at	4001	-1.63855	0.00023941	0.0127298	1.00476	0.0220075	0.0832263	1	2.64331	IND	LMNB1
NFYC	211251_x_at	4802	-1.1772	0.00678965	0.0549579	1.46571	0.000254077	0.00284582	1	2.64292	IND
TSTA3	201644_at	7264	-1.0945	0.00118448	0.0250952	1.54783	2.53194e-07	9.78555e-06	1	2.64232	IND
MPDU1	209208_at	9526	-1.38154	0.0276946	0.118116	1.25836	0.0918109	0.23221	1	2.6399	IND
EIF4B	211937_at	1975	-0.718949	0.0587401	0.183798	1.92058	8.66076e-06	0.000179844	1	2.63953	IND
HEBP1	218450_at	50865	-0.949716	0.00839926	0.0610966	-1.68586	0.0461693	0.142436	3	2.63557	repr
VPS37B	221704_s_at	79720	0.587173	0.0798685	0.219967	2.0428	0.00368555	0.0225624	2	2.62997	IND
RBM14	204178_s_at	10432	-1.52485	0.00201923	0.031203	1.10114	0.00630064	0.0332473	1	2.62599	IND
PSEN1	203460_s_at	5663	1.41079	0.000652998	0.0184424	-1.21156	0.0921001	0.232531	4	2.62235	repr
KLF5	209212_s_at	688	0.891112	0.0631111	0.192926	-1.73008	0.00642269	0.0336641	4	2.62119	repr
RHBDF1	218686_s_at	64285	0.742276	0.0203915	0.0979071	-1.87809	4.07256e-05	0.00066337	4	2.62036	repr
EXOSC5	218481_at	56915	-1.45213	0.0110372	0.0702275	1.1662	0.00153103	0.0115332	1	2.61833	IND
GFRA2	205722_s_at	2675	-1.80669	0.00681747	0.0549932	0.80994	0.0320443	0.110147	1	2.61663	IND
ECD	203013_at	11319	-1.11173	0.0425429	0.151402	1.5041	0.00138796	0.0107448	1	2.61583	IND
GCDH	208369_s_at	2639	-1.4172	0.000845701	0.0208253	1.19524	0.0156903	0.0649593	1	2.61244	IND
KIAA0182	212057_at	23199	1.00725	0.022362	0.103688	1.5998	0.0164217	0.0671134	2	2.60706	IND
TUBB6	209191_at	84617	-0.848356	0.0284247	0.119702	-1.7578	0.0678208	0.188558	3	2.60616	repr
NUP37	218622_at	79023	-1.22737	0.0187411	0.0937147	1.37588	0.0205339	0.0792731	1	2.60325	IND	NUP37
TPP1	200742_s_at	1200	1.18238	0.0144365	0.0814977	-1.41608	0.0820755	0.215017	4	2.59846	repr
TTC17	218972_at	55761	1.0965	0.0358317	0.137529	-1.50188	0.0260365	0.0942536	4	2.59838	repr
MSH2	209421_at	4436	-1.18797	0.000502725	0.0170891	1.41006	0.0137035	0.058965	1	2.59803	IND
ACBD3	202324_s_at	64746	1.57574	0.000222832	0.0125392	-1.0222	0.0381226	0.12513	4	2.59795	repr
RAB1A	207791_s_at	5861	0.858367	0.00508444	0.0469413	-1.73891	0.000484336	0.00474488	4	2.59728	repr
MAF	209348_s_at	4094	0.883874	0.0432633	0.152768	-1.71119	0.00337571	0.0212602	4	2.59507	repr
MDFIC	211675_s_at	29969	-0.589032	0.0672865	0.199912	-2.00552	0.00153142	0.0115332	3	2.59455	repr
ATP5D	213041_s_at	513	-1.33831	0.00172237	0.0288455	1.25623	0.0265616	0.095275	1	2.59454	IND
APOLD1	221031_s_at	81575	1.11904	0.0556952	0.177347	-1.47547	0.0552039	0.162743	4	2.59451	repr
SPRED2	212458_at	200734	0.92589	0.12718	0.287976	-1.66337	0.00535037	0.0297894	4	2.58926	repr
RAP1B	200833_s_at	5908	0.837204	0.00727838	0.0568215	-1.75019	0.0628496	0.17862	4	2.58739	repr
DCLRE1A	209804_at	9937	-1.85151	0.0135263	0.0789578	0.733888	0.0212744	0.0810639	1	2.5854	IND	DCLRE1A
CDCA4	218399_s_at	55038	-1.20065	0.00609657	0.051827	1.37989	0.00621046	0.0328949	1	2.58054	IND
ZWILCH	218349_s_at	55055	-1.01012	0.0084187	0.0611116	1.56673	0.0102419	0.0475206	1	2.57684	IND
PA2G4	208676_s_at	5036	-1.21837	0.000430329	0.0163618	1.35763	0.00141987	0.0108677	1	2.576	IND	PA2G4
C16orf58	217891_at	64755	-0.670986	0.016912	0.0897129	1.90455	0.000146816	0.00184742	1	2.57553	IND
ID3	207826_s_at	3399	0.424823	0.0829434	0.224913	-2.14941	0.00135435	0.0106096	4	2.57423	repr
ATP5H	210149_s_at	10476	-0.449341	0.07068	0.205542	2.1215	1.34392e-06	3.80896e-05	1	2.57084	IND
H1FX	204805_s_at	8971	-1.03008	0.00444852	0.0436332	1.54015	0.0852687	0.220507	1	2.57023	IND
DNMBP	212838_at	23268	1.16055	0.0170975	0.0901529	-1.40816	0.00369645	0.0225898	4	2.56871	repr
FUZ	221187_s_at	80199	-1.72027	0.000569056	0.0178694	0.848019	0.0101973	0.0473765	1	2.56829	IND
DPH5	219590_x_at	51611	-0.723518	0.0658093	0.197316	1.84376	0.000124578	0.00162274	1	2.56728	IND
SLCO5A1	220984_s_at	81796	-0.985772	0.0534572	0.172565	1.57227	0.000468807	0.00461201	1	2.55804	IND
CLPP	202799_at	8192	-0.94043	0.00356307	0.04006	1.61475	0.0055899	0.0306943	1	2.55518	IND
DBI	209389_x_at	1622	-0.891504	0.0202936	0.0975717	1.65985	0.0223112	0.0838785	1	2.55135	IND
CCDC90B	218288_s_at	60492	-1.15084	0.00132959	0.0262247	1.38427	0.0434616	0.136905	1	2.53511	IND
FAM127A	201828_x_at	8933	1.0082	0.0378055	0.141524	-1.52631	0.09892	0.244571	4	2.53451	repr
PAIP1	208051_s_at	10605	-0.407206	0.0988041	0.249906	2.12607	2.07529e-05	0.000383139	1	2.53328	IND
ARHGAP17	218076_s_at	55114	-0.981671	0.0537579	0.173053	1.54784	0.0143988	0.0610802	1	2.52951	IND			ARHGAP17
DGAT1	203669_s_at	8694	-1.3586	0.00505782	0.0468732	1.15367	0.0178966	0.0716882	1	2.51226	IND
UBXD6	215983_s_at	7993	-0.844754	0.0334765	0.131844	1.65878	5.09191e-07	1.69746e-05	1	2.50354	IND			UBXD6
SEC24A	212900_at	10802	1.54823	0.0006096	0.0178795	-0.955107	0.0156451	0.0648813	4	2.50333	repr
CDC25C	205167_s_at	995	-1.68088	0.00222357	0.0323865	0.812773	0.0404333	0.130462	1	2.49365	IND
PTPRG	204944_at	5793	1.38602	0.0254706	0.112115	-1.10638	0.0284386	0.100572	4	2.4924	repr			PTPRG
RNMT	202683_s_at	8731	0.772238	0.0377431	0.141366	1.7144	3.90001e-05	0.00064396	2	2.48664	IND
FARSA	202159_at	2193	-1.24274	0.00066811	0.0185019	1.24268	0.027952	0.09905	1	2.48541	IND
MFHAS1	213457_at	9258	1.50716	0.0212366	0.100462	-0.976585	0.0722742	0.19674	4	2.48374	repr
C1orf54	219506_at	79630	-1.17962	0.0524452	0.170568	1.30377	0.00743824	0.0376678	1	2.48339	IND
OPTN	202074_s_at	10133	0.614848	0.0925444	0.240094	-1.8635	0.00486715	0.027766	4	2.47835	repr
NUP88	202900_s_at	4927	-1.44513	0.0010135	0.0226315	1.03112	0.0818033	0.214543	1	2.47625	IND	NUP88
RNF111	218761_at	54778	1.35359	0.000179019	0.0114732	1.12116	0.0156324	0.0648813	2	2.47474	IND
FBXO46	205310_at	23403	-0.694179	0.00916847	0.0641682	1.77933	3.19822e-08	1.63017e-06	1	2.47351	IND
EFNB1	202711_at	1947	-1.39031	0.00414205	0.0420393	1.08039	0.000974437	0.00812108	1	2.4707	IND	EFNB1
DVL2	57532_at	1856	-0.828567	0.0185808	0.0932222	1.6387	2.95343e-05	0.000511686	1	2.46727	IND
MTMR15	203678_at	22909	-0.698244	0.0620524	0.190601	1.76511	1.95754e-06	5.17644e-05	1	2.46335	IND
ADRA1D	210960_at	146	-1.43528	0.0144331	0.0814977	1.02806	0.00250717	0.0169409	1	2.46334	IND
PEBP1	205353_s_at	5037	-0.484302	0.0818674	0.223229	1.97829	0.0085881	0.0419312	1	2.46259	IND
GTSE1	204318_s_at	51512	-1.50466	0.0830815	0.225114	0.956228	0.0243047	0.0895542	1	2.46089	IND	GTSE1
MPZL1	210594_x_at	9019	1.49481	0.0537189	0.173012	-0.962194	1.71467e-07	7.20301e-06	4	2.45701	repr
LRIG1	211596_s_at	26018	-1.2457	0.0578536	0.181914	1.21118	0.0450149	0.140166	1	2.45688	IND	LRIG1
PAN2	203117_s_at	9924	-0.550377	0.0649246	0.196024	1.90427	2.5798e-05	0.000461738	1	2.45465	IND
HDAC1	201209_at	3065	-0.642718	0.0330775	0.130712	1.80818	0.00454361	0.0263663	1	2.45089	IND
PDCD2	213581_at	5134	-1.11492	0.00620852	0.052363	1.33435	0.00163506	0.0121704	1	2.44928	IND
SNRPF	203832_at	6636	-0.570208	0.0234404	0.106718	1.87837	0.0101285	0.0471335	1	2.44858	IND
PMVK	203515_s_at	10654	-1.19948	0.0113683	0.0711429	1.24754	0.00344504	0.0214826	1	2.44702	IND
SAC3D1	205449_at	29901	-1.34134	0.000428567	0.0163618	1.10422	0.0478459	0.145944	1	2.44555	IND
KIAA0040	203143_s_at	9674	0.731832	0.0397028	0.145173	-1.71358	0.000287935	0.00313277	4	2.44541	repr
BOLA1	219345_at	51027	-1.01067	0.0281208	0.11907	1.43403	7.50168e-07	2.32453e-05	1	2.44469	IND
TBC1D3	209403_at	84218	1.22345	0.00039958	0.0160614	1.2188	0.0392919	0.127835	2	2.44225	IND
KATNB1	203162_s_at	10300	-1.32301	0.000509405	0.0170891	1.11899	0.00379754	0.0230474	1	2.442	IND			KATNB1
GSTA4	202967_at	2941	-0.663673	0.0655347	0.196941	1.77655	0.0427737	0.135466	1	2.44023	IND
LIMS1	212687_at	3987	0.702611	0.00936187	0.0647956	-1.73171	0.00421655	0.0248819	4	2.43433	repr
ALDH2	201425_at	217	0.803457	0.0585236	0.183335	-1.62551	0.0579612	0.16875	4	2.42897	repr
NDC80	204162_at	10403	-1.1222	0.0283097	0.119526	1.30632	0.00255259	0.0172147	1	2.42852	IND
SUPT16H	217815_at	11198	-0.779399	0.00636153	0.0526325	1.64335	0.00336679	0.0212585	1	2.42274	IND			SUPT16H
OGDH	201282_at	4967	-0.936301	0.00368493	0.0408287	1.48346	0.0539341	0.15987	1	2.41976	IND
OSGEPL1	220631_at	64172	-1.25102	0.00392182	0.0419118	1.16675	0.00116096	0.00942981	1	2.41777	IND
CDC40	203376_at	51362	-1.02855	0.0293843	0.122125	1.38792	0.00519666	0.0291959	1	2.41647	IND
MRPS28	219819_s_at	28957	-1.015	0.00367189	0.0408027	1.40092	0.0133237	0.0577799	1	2.41592	IND
PRPS1	208447_s_at	5631	-1.34473	0.000362941	0.0155666	-1.06813	0.0934105	0.234589	3	2.41286	repr
SRPRB	218140_x_at	58477	1.09801	0.00158852	0.0280041	-1.31327	0.101245	0.248312	4	2.41129	repr
FKBP1B	206857_s_at	2281	-0.686234	0.070317	0.204807	-1.72194	0.0258458	0.0937594	3	2.40817	repr
SLC27A3	222217_s_at	11000	-0.639267	0.0750004	0.212182	-1.76726	0.0117607	0.0528256	3	2.40653	repr
MRPS2	218001_at	51116	-0.505523	0.0808377	0.222049	1.89823	0.00501247	0.0284336	1	2.40376	IND
GNPAT	201956_s_at	8443	-0.893437	0.00424692	0.042433	1.50808	0.00687413	0.0354491	1	2.40152	IND	GNPAT
RBMX	213762_x_at	27316	-1.21073	0.00126964	0.0257338	1.18996	0.0605605	0.174005	1	2.40069	IND	RBMX
EHMT2	202326_at	10919	-0.868116	0.0435083	0.153532	1.52911	0.00183433	0.0132607	1	2.39722	IND
C3orf28	220942_x_at	26355	-1.24174	0.0031956	0.0382558	1.14263	0.0600239	0.172852	1	2.38437	IND
APEX1	210027_s_at	328	-0.769128	0.00911473	0.064049	1.61354	0.0049703	0.02824	1	2.38267	IND	APEX1
GALNT10	207357_s_at	55568	1.06075	0.0132649	0.0780799	-1.32047	6.36757e-05	0.00095909	4	2.38122	repr
REXO2	218194_at	25996	0.971367	0.00487676	0.0457375	-1.40613	0.0894252	0.228401	4	2.3775	repr
SF3B3	200687_s_at	23450	-1.03934	0.00291805	0.0368502	1.33801	0.00091313	0.00771063	1	2.37735	IND
PEX6	204545_at	5190	-0.719746	0.0574289	0.181227	1.65644	0.00084474	0.00729068	1	2.37619	IND
RECQL4	213520_at	9401	-1.36033	0.0170338	0.0901529	1.01404	0.0112225	0.0508626	1	2.37437	IND
FDXR	207813_s_at	2232	-1.2967	0.0132479	0.0780451	1.07546	0.0618181	0.176258	1	2.37216	IND
RNF41	201962_s_at	10193	1.33111	0.0114143	0.0711966	1.04072	0.0916555	0.232075	2	2.37183	IND
FKBP4	200894_s_at	2288	-1.1929	0.000969961	0.0222964	1.17858	0.0472824	0.144728	1	2.37148	IND	FKBP4
MKKS	218138_at	8195	-1.19957	0.00160881	0.0281502	1.16681	0.00980303	0.0460926	1	2.36638	IND	MKKS
IGF1R	203628_at	3480	1.32319	0.0057655	0.050036	1.03707	0.0868624	0.22356	2	2.36026	IND
C11orf67	221599_at	28971	1.15506	0.0159322	0.0861392	-1.20498	0.000882858	0.00753643	4	2.36004	repr
TWIST1	213943_at	7291	-0.686898	0.0845566	0.227356	-1.66596	0.0100738	0.0469887	3	2.35285	repr
CENTG2	204066_s_at	116987	-0.678406	0.0232252	0.106013	1.67171	0.0117271	0.0527421	1	2.35012	IND
APITD1	213454_at	378708	-1.23822	0.000657776	0.0184424	1.11079	0.0337756	0.114385	1	2.34901	IND
PALB2	219530_at	79728	-0.797316	0.0110659	0.0702508	1.5505	5.74092e-10	4.92459e-08	1	2.34781	IND
C12orf44	218214_at	60673	0.801297	0.01496	0.0830661	-1.54629	0.00341229	0.0214113	4	2.34758	repr
SLC39A4	219215_s_at	55630	-1.39751	0.000401243	0.0160614	0.946324	0.0174607	0.0704233	1	2.34383	IND	SLC39A4
SNAPC1	205443_at	6617	1.47617	0.00382721	0.0414801	-0.867055	0.0538452	0.159674	4	2.34322	repr
C19orf42	212509_s_at	79086	0.562397	0.0589567	0.184394	-1.78066	0.0886972	0.226871	4	2.34305	repr
CCDC131	213065_at	196441	-0.526902	0.0604529	0.187465	1.80915	0.00145405	0.011069	1	2.33605	IND
PCDHA12	210674_s_at	56137	1.01217	0.0175901	0.0909794	1.32069	0.051415	0.154157	2	2.33286	IND			PCDHA12
ICAM4	207194_s_at	3386	-1.2557	0.0131394	0.0777314	-1.07568	0.0341168	0.115152	3	2.33138	repr
TMEM127	219460_s_at	55654	1.1402	0.00791283	0.0592746	-1.18861	0.0216182	0.0821516	4	2.3288	repr
SETX	201964_at	23064	0.786351	0.0575445	0.181307	1.53594	0.000918438	0.00774615	2	2.32229	IND
METTL3	209265_s_at	56339	-1.05945	0.0122421	0.0742335	1.26008	0.0568778	0.166422	1	2.31953	IND			METTL3
KLHL24	221985_at	54800	0.958165	0.0445635	0.155025	-1.36115	0.0103087	0.0477363	4	2.31931	repr
ARL1	201659_s_at	400	1.03341	0.00512419	0.0471158	-1.28066	0.00637325	0.0334839	4	2.31408	repr
EPHB3	1438_at	2049	-1.1998	0.0839325	0.226373	1.11423	0.0303724	0.105978	1	2.31403	IND	EPHB3
PDLIM5	216804_s_at	10611	0.688774	0.0916336	0.238811	-1.62504	0.00234641	0.0160864	4	2.31381	repr
MTR	203774_at	4548	-1.60907	0.000194631	0.0116294	0.70459	0.0929385	0.233882	1	2.31366	IND
HIF1A	200989_at	3091	0.643892	0.0387307	0.143745	-1.66737	0.0242826	0.0895197	4	2.31126	repr
C5orf5	218518_at	51306	1.24977	0.000587246	0.0178795	-1.05864	0.0424599	0.135016	4	2.3084	repr
ACCN1	206690_at	40	-1.11854	0.0577455	0.181737	1.18844	0.00475725	0.0272941	1	2.30698	IND	ACCN1
MRPS16	218046_s_at	51021	-1.09462	0.017407	0.0906972	1.21031	0.019838	0.0775436	1	2.30493	IND
PICALM	215236_s_at	8301	1.01516	0.0197657	0.0962824	-1.28913	0.0736109	0.199353	4	2.3043	repr
TLE1	203221_at	7088	1.20288	0.00827234	0.0607313	-1.09267	0.0599925	0.172852	4	2.29555	repr		TLE1
LRP1	200785_s_at	4035	1.0527	0.0135947	0.0792079	-1.23948	0.00465172	0.0268199	4	2.29218	repr
AKTIP	218373_at	64400	0.444434	0.0874682	0.231471	-1.84241	0.000639725	0.00590529	4	2.28685	repr
CD63	200663_at	967	1.07156	0.00194245	0.0307038	-1.21388	0.0335146	0.113775	4	2.28544	repr
TLN2	212703_at	83660	1.0503	0.0175767	0.0909794	-1.23393	0.0211727	0.0807641	4	2.28423	repr		TLN2
CSNK1D	208774_at	1453	0.713997	0.0121467	0.0739097	1.56809	0.00554591	0.0305003	2	2.28209	IND
MRPL48	218281_at	51642	-1.23895	0.000908548	0.0214678	1.04069	0.00586531	0.0315995	1	2.27964	IND
C7orf44	209445_x_at	55744	-1.10685	0.0119423	0.0729821	1.17187	0.000167266	0.00204974	1	2.27872	IND
PECI	218025_s_at	10455	-0.939946	0.0071615	0.0563468	-1.33522	0.0714553	0.195515	3	2.27517	repr
TARBP2	203677_s_at	6895	-1.03571	0.0242368	0.109038	1.23611	0.0011941	0.00962122	1	2.27181	IND
FLJ14213	219383_at	79899	-1.45636	0.00410946	0.0420262	0.815051	0.00693762	0.0357242	1	2.27141	IND	FLJ14213
MERTK	206028_s_at	10461	-0.597501	0.0342675	0.133835	1.67213	0.00734246	0.0373711	1	2.26963	IND
RALA	214435_x_at	5898	1.15147	0.0863573	0.229831	-1.11755	0.0476285	0.145534	4	2.26902	repr
VLDLR	209822_s_at	7436	1.02654	0.0260842	0.113815	-1.24155	0.000768086	0.00676185	4	2.26809	repr
LARS	217810_x_at	51520	-0.969715	0.0175047	0.0909794	1.29738	0.000162585	0.00200308	1	2.26709	IND
CACNA1G	210380_s_at	8913	-0.725332	0.0466538	0.159071	1.54085	0.000136999	0.00174891	1	2.26618	IND
TIMM13	218188_s_at	26517	-0.856029	0.00420438	0.0422676	1.40919	0.0200717	0.078175	1	2.26522	IND
RAP2C	218669_at	57826	1.01378	0.0169111	0.0897129	-1.25113	0.00895445	0.043023	4	2.2649	repr
INTS8	218905_at	55656	-0.845843	0.00707144	0.0559511	1.41551	0.0358321	0.119508	1	2.26135	IND
MRPS31	212604_at	10240	-0.670391	0.0126452	0.0759575	1.59081	0.00645393	0.0337775	1	2.2612	IND	MRPS31		MRPS31
JAM3	212813_at	83700	0.602313	0.047064	0.160159	-1.65821	0.0116464	0.0524125	4	2.26052	repr
SMARCB1	212167_s_at	6598	-0.518915	0.0939229	0.242264	1.74052	0.000345563	0.00363876	1	2.25943	IND
PBX1	205253_at	5087	0.891625	0.0220759	0.10312	1.36645	0.00224094	0.0154596	2	2.25807	IND	PBX1
STX10	212625_at	8677	-0.994776	0.0028267	0.036585	1.26304	0.00332215	0.0210522	1	2.25781	IND
SIN3B	209352_s_at	23309	0.751524	0.0306789	0.125244	1.50411	0.00702345	0.0360605	2	2.25563	IND
WDR67	214061_at	93594	-0.990694	0.0042258	0.0422924	1.26453	0.00129771	0.0103026	1	2.25522	IND
BNIP3	201848_s_at	664	-0.837752	0.015855	0.0859734	1.41495	0.0383999	0.125764	1	2.25271	IND
CBX5	209715_at	23468	-1.12282	0.000865125	0.0209838	1.12861	0.0161647	0.066299	1	2.25143	IND	CBX5
HBP1	209102_s_at	26959	1.17908	0.0190198	0.0945827	-1.06523	0.0275341	0.0977168	4	2.24431	repr
C16orf53	218300_at	79447	-0.886782	0.04397	0.154037	1.35603	0.00014708	0.00184743	1	2.24281	IND
TRMT5	221952_x_at	57570	-1.31121	0.00852618	0.0615585	0.92717	0.0717483	0.195991	1	2.23839	IND			TRMT5
TMCO6	221096_s_at	55374	-0.956993	0.00846822	0.0613445	1.27863	0.00256502	0.0172248	1	2.23562	IND
UBE2G2	209041_s_at	7327	-1.38088	0.0130742	0.0774762	0.850361	0.0303892	0.105978	1	2.23124	IND
EXT1	201995_at	2131	1.29735	0.00571003	0.0498531	-0.932951	0.0702815	0.193412	4	2.2303	repr	EXT1		EXT1
COX8A	201119_s_at	1351	-0.836098	0.0194914	0.095542	1.3879	0.00632615	0.0333319	1	2.224	IND
PTDSS1	201433_s_at	9791	-0.673118	0.0389798	0.144061	1.54658	0.0128386	0.0563712	1	2.2197	IND
SEC11A	201290_at	23478	0.914352	0.00286318	0.0366995	-1.3031	0.0422365	0.134735	4	2.21746	repr
AVPI1	218631_at	60370	1.0158	0.0378704	0.141643	-1.20066	0.0464778	0.143137	4	2.21646	repr
ARHGAP1	202117_at	392	0.515224	0.0754074	0.212762	-1.70049	0.00165499	0.0122949	4	2.21572	repr
STC2	203438_at	8614	0.971153	0.0447784	0.155311	-1.24456	0.0309038	0.1074	4	2.21572	repr
FAM108A1	221267_s_at	81926	-0.584389	0.0394668	0.14489	1.62604	0.0459218	0.141984	1	2.21043	IND
KIF2A	213598_at	3796	-1.07068	0.00402566	0.0419118	1.13937	0.0145734	0.0613459	1	2.21004	IND
NCK2	203315_at	8440	0.89873	0.0534133	0.172502	-1.31057	0.00814052	0.0403811	4	2.2093	repr
NPDC1	218086_at	56654	-0.515772	0.0848004	0.227713	1.68946	0.00992595	0.0465771	1	2.20523	IND
TMEM30A	217743_s_at	55754	0.958224	0.0370854	0.139633	-1.24654	0.0223367	0.0839298	4	2.20476	repr
RTN4	211509_s_at	57142	0.802985	0.0106831	0.0689089	-1.40044	0.0130039	0.0568347	4	2.20343	repr
TOPBP1	202633_at	11073	-1.22174	0.00184024	0.0298955	0.979955	0.0397042	0.128641	1	2.20169	IND
NFATC1	211105_s_at	4772	0.708997	0.0322483	0.128922	-1.4918	0.00741897	0.0376244	4	2.20079	repr
LOC388344	212191_x_at	388344	-0.466244	0.0768666	0.215584	1.73296	0.00383513	0.0231955	1	2.19921	IND
ARHGAP19	37577_at	84986	-1.54712	0.00021566	0.0122335	0.649533	0.0952921	0.237774	1	2.19665	IND	ARHGAP19
LSM2	209449_at	57819	-1.199	0.000574981	0.0178795	0.99756	0.0953269	0.237776	1	2.19656	IND	LSM2
SMARCC1	201072_s_at	6599	-0.73583	0.0328672	0.13032	1.45857	0.00156034	0.0117133	1	2.1944	IND	SMARCC1
OAZ2	201365_at	4947	0.729458	0.019001	0.0945827	-1.46465	0.000649011	0.00596751	4	2.19411	repr
HNRNPA1	216559_x_at	3178	-1.29024	0.00597693	0.051208	0.903239	0.091748	0.232142	1	2.19348	IND
CTH	217127_at	1491	1.03338	0.0304043	0.124702	-1.15975	0.0138924	0.059476	4	2.19312	repr
RANBP1	202483_s_at	5902	-0.959319	0.00308072	0.0377523	1.23315	0.090242	0.2297	1	2.19247	IND	RANBP1
CHIC2	219492_at	26511	0.788103	0.018159	0.0924915	-1.39989	0.0456546	0.141469	4	2.18799	repr
RIPK2	209545_s_at	8767	0.754457	0.0242148	0.109038	-1.43143	0.00850439	0.0416283	4	2.18588	repr
PPA2	220741_s_at	27068	-0.854667	0.0259284	0.113534	1.33038	0.00420565	0.0248384	1	2.18504	IND
NARG2	218713_at	79664	-0.903479	0.0024787	0.0347425	1.28099	0.000135371	0.00173502	1	2.18447	IND
NDUFA8	218160_at	4702	-0.504522	0.0549558	0.175948	1.67931	0.0377059	0.124227	1	2.18383	IND
ADO	212502_at	84890	-0.703886	0.0198603	0.096537	1.47701	0.0310608	0.107839	1	2.1809	IND
EHD1	208112_x_at	10938	1.03268	0.000838287	0.0208253	-1.14787	0.0303769	0.105978	4	2.18055	repr
RPP25	219143_s_at	54913	-1.33407	0.007013	0.0558025	0.842762	0.0189063	0.0745444	1	2.17683	IND
RAMP2	205779_at	10266	-1.31796	0.0176035	0.0909794	0.851905	0.0862275	0.222333	1	2.16986	IND
RPL10A	200036_s_at	4736	-0.67501	0.0195543	0.0955836	1.49407	0.0148788	0.0623332	1	2.16908	IND			RPL10A
PMS1	213677_s_at	5378	-1.05169	0.0072396	0.0567075	1.11677	0.0664639	0.185814	1	2.16846	IND
C17orf90	50374_at	339229	-0.821825	0.00640509	0.0526325	1.34494	7.16607e-05	0.00104145	1	2.16676	IND
SASH1	213236_at	23328	1.10814	0.0180422	0.0922303	-1.05822	0.0575189	0.16774	4	2.16636	repr
ATP5G2	208764_s_at	517	-0.766544	0.0137901	0.0794746	1.39949	0.0321258	0.110231	1	2.16604	IND
SPAST	209748_at	6683	-0.635969	0.0474893	0.161138	1.52902	2.85635e-05	0.000501037	1	2.16499	IND
IRF3	202621_at	3661	-0.80732	0.0163731	0.0875808	1.35647	0.0129164	0.0566068	1	2.16379	IND
CPSF3L	217994_x_at	54973	-0.916472	0.0072608	0.0567472	1.24653	0.00215611	0.0149862	1	2.163	IND
NUP93	202188_at	9688	-0.663141	0.0224136	0.103859	1.49967	0.00685136	0.0353576	1	2.16281	IND
MPHOSPH9	215731_s_at	10198	-1.13866	0.0118964	0.0727645	1.01408	0.00374016	0.0227777	1	2.15274	IND
PPP1CA	200846_s_at	5499	-0.74035	0.0101945	0.0671426	1.41159	0.0727097	0.197773	1	2.15194	IND
ARC	210090_at	23237	-1.04585	0.0694483	0.203372	-1.10343	0.0267164	0.0956514	3	2.14928	repr
MCCC2	209623_at	64087	-0.903328	0.00603518	0.0515813	1.24388	0.00907966	0.0435057	1	2.14721	IND
FAM134B	218532_s_at	54463	-0.642219	0.0384145	0.142897	1.50276	0.0226139	0.0846938	1	2.14498	IND
LTBP4	213176_s_at	8425	-1.24044	0.0330727	0.130712	0.900447	0.0502032	0.151298	1	2.14088	IND
R3HDM1	202754_at	23518	-0.669291	0.0392654	0.144603	1.47131	0.0269865	0.0963082	1	2.1406	IND	R3HDM1
DNAJB6	209015_s_at	10049	1.19616	0.153848	0.323035	-0.943653	0.00506203	0.0286454	4	2.13981	repr			DNAJB6
PBRM1	220355_s_at	55193	-0.575056	0.0615677	0.189697	1.56023	0.00080267	0.00699626	1	2.13528	IND
NDUFS2	201966_at	4720	-0.835548	0.00406367	0.0419118	1.2963	0.00959628	0.0454547	1	2.13185	IND	NDUFS2
CXorf40A	213315_x_at	91966	0.946672	0.00198425	0.0309472	-1.18074	0.0134148	0.0580319	4	2.12741	repr
ING2	205981_s_at	3622	-1.04842	0.00141865	0.0268867	-1.07893	0.0302028	0.105584	3	2.12735	repr
C20orf111	209020_at	51526	0.816301	0.0234253	0.106718	-1.30666	0.0447252	0.139635	4	2.12297	repr
PPP2R1B	202886_s_at	5519	-0.906181	0.0322274	0.128922	-1.21667	0.000375459	0.00387809	3	2.12285	repr
ISOC1	218170_at	51015	-1.04523	0.00776921	0.0586359	-1.07461	0.0476721	0.145604	3	2.11984	repr
C14orf122	219203_at	51016	-1.16884	0.0801373	0.220621	0.947272	0.0230771	0.0858405	1	2.11611	IND
INPP5A	203006_at	3632	-0.678693	0.0732412	0.209471	-1.43628	0.0538428	0.159674	3	2.11497	repr
PAQR4	212858_at	124222	-0.718503	0.0152015	0.0841647	1.39518	9.22945e-07	2.79827e-05	1	2.11368	IND
JRK	216309_x_at	8629	0.838208	0.0178195	0.0914909	1.27503	0.000424956	0.00427631	2	2.11323	IND
RAB5B	201276_at	5869	0.864592	0.0837001	0.226093	1.24748	0.0183943	0.0731403	2	2.11207	IND
SSFA2	202506_at	6744	1.23558	0.00755173	0.0579268	0.873551	0.0857521	0.221432	2	2.10913	IND
SOX12	204432_at	6666	-1.06017	0.00169039	0.0288007	1.04896	0.000419439	0.00423899	1	2.10913	IND
SFRS9	201698_s_at	8683	-0.702024	0.00959156	0.0654247	1.4057	0.00617803	0.0327972	1	2.10773	IND
NIF3L1	218133_s_at	60491	-1.12999	0.00818064	0.0605712	0.975054	0.0525341	0.156778	1	2.10504	IND	NIF3L1
NAT10	217884_at	55226	-0.741382	0.0279187	0.118704	1.36331	0.00404894	0.0241973	1	2.10469	IND
FKBP3	218003_s_at	2287	-0.834905	0.015285	0.0844318	1.26568	0.00051317	0.00497881	1	2.10058	IND
PRPF8	200000_s_at	10594	-0.474458	0.0584109	0.183175	1.62	0.0121623	0.0541285	1	2.09445	IND
ZXDC	218639_s_at	79364	-0.941532	0.0346859	0.13487	1.15129	0.00537459	0.0298617	1	2.09282	IND
LAMB3	209270_at	3914	-0.704208	0.0454945	0.157021	1.38647	0.0595463	0.1718	1	2.09067	IND	LAMB3
FAM21C	211068_x_at	253725	1.30961	0.000609395	0.0178795	0.780997	0.0800457	0.211511	2	2.09061	IND
FBXL6	219189_at	26233	-1.27625	0.00200311	0.0310975	0.813235	0.0340831	0.115094	1	2.08948	IND
CASP8AP2	222201_s_at	9994	-1.0236	0.0569621	0.180077	1.06344	0.00494811	0.0281594	1	2.08704	IND
C21orf45	219004_s_at	54069	-1.25668	0.00259259	0.0354915	0.827697	0.0903912	0.229867	1	2.08438	IND
RAB20	219622_at	55647	0.609622	0.0332052	0.131069	-1.47135	0.0103545	0.0478538	4	2.08098	repr
ZNF32	209538_at	7580	-0.672241	0.0382003	0.142396	1.4083	0.00211466	0.0148005	1	2.08054	IND
CALCRL	210815_s_at	10203	-1.22632	0.0504939	0.167175	0.851934	0.0764322	0.204887	1	2.07826	IND
LOC654342	214110_s_at	654342	0.923155	0.0418959	0.150278	-1.15389	0.0119931	0.0535312	4	2.07704	repr
C6orf134	218874_s_at	79969	0.437396	0.0953526	0.244549	1.63961	3.07143e-05	0.00052311	2	2.07701	IND
RPL39L	210115_at	116832	-0.975337	0.0269867	0.116323	1.10074	0.091319	0.231528	1	2.07608	IND
SECISBP2	218265_at	79048	-0.671617	0.0187456	0.0937147	1.40444	0.000176497	0.00214048	1	2.07605	IND			SECISBP2
POGK	218229_s_at	57645	-0.950594	0.088444	0.233338	1.12383	0.0808218	0.212524	1	2.07442	IND
PHC2	200919_at	1912	0.64621	0.0265857	0.115363	1.42815	0.00140278	0.0108074	2	2.07436	IND
ANXA7	201366_at	310	0.588904	0.056428	0.178957	-1.48221	0.000181794	0.00218199	4	2.07112	repr
NEDD9	202150_s_at	4739	1.16826	0.0099815	0.066574	-0.902649	0.0584333	0.169493	4	2.0709	repr
BRD7	221776_s_at	29117	-0.647738	0.0493334	0.164616	1.41697	0.00415984	0.0247131	1	2.0647	IND
FIG4	203656_at	9896	-0.890807	0.0156	0.0853527	1.17355	0.0167391	0.0680889	1	2.06436	IND
CRY1	209674_at	1407	0.756721	0.0236728	0.107637	-1.30487	0.00574641	0.0311801	4	2.06159	repr
NONO	208698_s_at	4841	-0.699483	0.0160776	0.0865605	1.36062	0.0353093	0.118192	1	2.0601	IND
MDFI	205375_at	4188	-1.03357	0.00789574	0.0592097	1.02646	0.000420696	0.00424559	1	2.06003	IND	MDFI
LRFN4	219491_at	78999	-1.11358	0.00529611	0.0475771	0.945534	0.0313205	0.108634	1	2.05912	IND
RAD51C	209849_s_at	5889	-0.770293	0.0160066	0.0864086	1.28646	0.00223041	0.0154264	1	2.05676	IND	RAD51C
SIRT1	218878_s_at	23411	-0.84885	0.00853278	0.0615585	-1.20489	0.0137931	0.0591591	3	2.05374	repr
LMBR1L	220036_s_at	55716	1.23346	0.00341003	0.0394633	-0.819519	0.0332669	0.113331	4	2.05297	repr
FLAD1	205661_s_at	80308	-0.924527	0.0489084	0.163902	1.12809	0.000991418	0.00822363	1	2.05261	IND
SET	200631_s_at	6418	-0.792424	0.00407498	0.0419421	1.25866	0.0425142	0.135016	1	2.05108	IND
MTERFD1	219363_s_at	51001	-0.849174	0.0365546	0.138537	1.19623	0.00345449	0.0215225	1	2.0454	IND
BIRC2	202076_at	329	0.786754	0.00734981	0.0571887	-1.25723	0.0798867	0.21117	4	2.04398	repr
JARID1B	201548_s_at	10765	0.714437	0.0131728	0.0778623	1.32657	0.0425589	0.13509	2	2.041	IND	JARID1B
NGFR	205858_at	4804	-1.33658	0.00462121	0.044346	0.699828	0.100563	0.247331	1	2.03641	IND	NGFR
MCCC1	218440_at	56922	-1.29612	0.0048647	0.0457375	0.737728	0.0314414	0.108892	1	2.03385	IND
GLS	221510_s_at	2744	0.711863	0.0740503	0.21102	-1.32066	0.0220059	0.0832263	4	2.03252	repr	GLS	GLS
RAI16	218337_at	64760	1.03491	0.00181305	0.0297967	0.993653	0.0145254	0.0612534	2	2.02856	IND
PPOX	204788_s_at	5498	-0.852421	0.012677	0.0760189	1.17592	0.025065	0.0917312	1	2.02834	IND
TIMM9	218316_at	26520	-0.824638	0.0393921	0.144843	1.20347	0.00563365	0.0308622	1	2.02811	IND
ATXN10	208832_at	25814	-1.16136	0.0106264	0.0686372	0.8667	0.0230574	0.0858125	1	2.02806	IND
POLD2	201115_at	5425	-1.01599	0.00151925	0.0276135	1.01196	0.0348064	0.116982	1	2.02795	IND
BTBD2	207722_s_at	55643	-0.89935	0.00345075	0.0395964	1.12857	0.00137582	0.0107083	1	2.02792	IND
SPG11	203513_at	80208	-0.735591	0.0155479	0.0853527	1.2891	0.0371681	0.122915	1	2.02469	IND
ZNF672	218068_s_at	79894	-0.83692	0.0293971	0.122125	1.18749	0.00649129	0.0339226	1	2.02441	IND			ZNF672
HNRPUL1	208713_at	11100	-0.528499	0.0723747	0.207789	1.49558	0.00510741	0.0288096	1	2.02408	IND
EFS	204400_at	10278	-0.826548	0.00999092	0.066574	1.19116	0.00876518	0.0424032	1	2.01771	IND
TRAF3	221571_at	7187	-0.851715	0.0200439	0.0969662	1.16546	0.00349869	0.0217401	1	2.01717	IND
COX15	219547_at	1355	-0.820809	0.0186	0.0932521	1.18517	0.000811086	0.0070492	1	2.00598	IND
SNRP70	201221_s_at	6625	-0.518455	0.0678563	0.200969	1.48666	0.00510375	0.0288096	1	2.00511	IND
NXT1	218708_at	29107	-0.681556	0.015698	0.0855306	-1.32347	0.0187145	0.0740787	3	2.00503	repr
SOX2	213721_at	6657	-1.1784	0.0137554	0.0794746	0.825801	0.0563832	0.165388	1	2.0042	IND
RAD23A	201039_s_at	5886	-0.819556	0.0190336	0.0945827	1.1845	0.0690879	0.191339	1	2.00406	IND
GCN5L2	202182_at	2648	-0.6114	0.0502135	0.166464	1.39201	0.00311062	0.0199818	1	2.00341	IND
ATP6V0C	36994_at	527	0.569794	0.0484759	0.162992	1.43266	0.0570117	0.166653	2	2.00246	IND
DDIT3	209383_at	1649	1.47742	0.0114598	0.0712084	-0.52354	0.085645	0.221237	4	2.00096	repr
ARHGEF1	203055_s_at	9138	-0.670733	0.0100662	0.0668014	1.32877	0.00337612	0.0212602	1	1.99951	IND
ARL6IP4	218216_x_at	51329	-1.076	0.00628899	0.0525319	0.91684	0.0290713	0.102397	1	1.99284	IND
KIAA0317	202128_at	9870	0.627262	0.0506649	0.167313	1.36395	0.0208937	0.0800857	2	1.99121	IND
TUFM	201113_at	7284	-0.545133	0.041378	0.149402	1.44599	0.0261225	0.0943737	1	1.99112	IND
DERA	218102_at	51071	-1.05904	0.00244519	0.0346066	-0.930869	0.0719178	0.19615	3	1.98991	repr
PTENP1	217492_s_at	11191	0.566406	0.0651815	0.196438	-1.42083	0.0363274	0.120816	4	1.98724	repr
PDCD5	219275_at	9141	-1.24775	0.00042793	0.0163618	0.73499	0.0404976	0.13057	1	1.98274	IND
MAPBPIP	218291_at	28956	-0.636985	0.0361021	0.137787	1.34254	0.00446836	0.0260401	1	1.97952	IND
DFNA5	203695_s_at	1687	0.721098	0.0364209	0.138313	-1.25804	0.0502941	0.151377	4	1.97914	repr
TTC19	217964_at	54902	-0.600719	0.0526865	0.171097	1.37786	0.0379809	0.12484	1	1.97858	IND
PTCD3	217895_at	55037	-0.853333	0.00349793	0.0397657	1.12455	0.0743929	0.200875	1	1.97788	IND
TCTA	203054_s_at	6988	1.17503	0.0208052	0.0992835	-0.802757	0.0617335	0.17616	4	1.97779	repr
TUBGCP4	211337_s_at	27229	-1.31024	0.00341896	0.0394633	0.66734	0.101377	0.248548	1	1.97758	IND
U1SNRNPBP	205300_s_at	11066	-0.714744	0.0185671	0.09322	1.26245	7.85441e-05	0.00111387	1	1.9772	IND
EEF1E1	204905_s_at	9521	-0.605323	0.0244535	0.109526	1.37162	0.0239059	0.0884558	1	1.97694	IND
KPNA4	209653_at	3840	1.08442	0.0845929	0.227356	-0.884499	0.00879705	0.0424989	4	1.96892	repr
C1orf112	220840_s_at	55732	-1.50498	0.00342883	0.0394633	0.4628	0.0906479	0.23027	1	1.96778	IND
SAFB	201747_s_at	6294	-1.36402	0.00100558	0.0225983	0.602898	0.0228851	0.0853627	1	1.96692	IND
NUP133	202184_s_at	55746	-0.680164	0.0259842	0.113594	1.28572	0.00567795	0.0310565	1	1.96589	IND
BAZ2A	201353_s_at	11176	0.422857	0.0775975	0.216318	1.54246	7.43309e-09	4.93249e-07	2	1.96531	IND
DOPEY1	213271_s_at	23033	-0.814618	0.0568117	0.179763	1.15039	0.00196354	0.0140471	1	1.965	IND
CENPB	212437_at	1059	-1.55177	0.000455914	0.01679	0.412	0.092872	0.233809	1	1.96377	IND
ZC3H4	213390_at	23211	-0.950411	0.04633	0.158395	1.0123	0.0604114	0.173868	1	1.96271	IND
AP3S1	202442_at	1176	0.429334	0.0877505	0.232044	-1.53043	0.0147765	0.0619785	4	1.95976	repr
CYHR1	213072_at	50626	1.00733	0.00157405	0.0280041	0.95178	0.00272075	0.0179192	2	1.95911	IND
PTEN	204053_x_at	5728	0.579295	0.0813748	0.22285	-1.37914	0.029987	0.105044	4	1.95843	repr
C8orf32	219060_at	55093	-1.25268	0.00562661	0.0494666	0.70361	0.00851783	0.0416651	1	1.95629	IND
MIF	217871_s_at	4282	-0.518229	0.046358	0.158395	1.43727	0.0540595	0.16004	1	1.9555	IND
SEC23B	201583_s_at	10483	0.793555	0.028151	0.11907	1.15932	0.0381534	0.125173	2	1.95288	IND
ALMS1	214220_s_at	7840	-0.592627	0.0769993	0.215782	1.35947	1.83292e-05	0.000344725	1	1.9521	IND
NOLA2	209104_s_at	55651	-0.710234	0.00878747	0.0625067	1.23651	0.00238959	0.0162872	1	1.94674	IND
MED22	206593_s_at	6837	-0.668057	0.0252571	0.11153	1.27838	3.55636e-05	0.000594191	1	1.94643	IND
UMPS	202706_s_at	7372	-0.881155	0.068003	0.201234	1.06506	0.00148639	0.0112786	1	1.94621	IND	UMPS
MYBBP1A	219098_at	10514	-1.09368	0.0185036	0.0932063	0.851784	0.00879634	0.0424989	1	1.94546	IND
UBAC1	202151_s_at	10422	-0.812829	0.05854	0.183335	1.13184	0.0706457	0.19411	1	1.94467	IND
ACTR1B	202135_s_at	10120	-1.10304	0.000881319	0.0213031	0.840072	0.0227663	0.0851023	1	1.94311	IND
SOCS1	210001_s_at	8651	0.739858	0.0294814	0.122344	-1.20018	0.0123821	0.0548619	4	1.94004	repr
MGC3196	220934_s_at	79064	-0.754976	0.0341221	0.133564	1.18154	0.000402195	0.00408821	1	1.93652	IND	MGC3196
AGPAT5	218096_at	55326	-0.720749	0.0610528	0.188837	1.21472	0.0258361	0.0937594	1	1.93546	IND
SSX1	206626_x_at	6756	-0.749592	0.0484247	0.162898	1.18578	0.0276935	0.098233	1	1.93537	IND
RBM7	218379_at	10179	0.658798	0.0583411	0.183038	-1.27608	1.57719e-05	0.000305745	4	1.93488	repr
CD58	211744_s_at	965	-0.578965	0.0431311	0.152684	-1.35438	0.00762818	0.038436	3	1.93335	repr
DCHS1	218892_at	8642	0.920117	0.0729985	0.209238	1.0122	0.00428502	0.0251803	2	1.93232	IND
PUS1	218670_at	80324	-1.07444	0.0212018	0.100427	0.857783	0.0332875	0.113331	1	1.93223	IND
ECM1	209365_s_at	1893	0.779677	0.0134193	0.0786595	-1.15224	0.0433503	0.136758	4	1.93192	repr		ECM1
KLHL20	204177_s_at	27252	1.125	0.0277301	0.118143	-0.804858	0.0348086	0.116982	4	1.92986	repr
JMJD6	212723_at	23210	1.19122	0.00327865	0.0387597	-0.736908	0.0656947	0.184617	4	1.92813	repr
FAM18B	218446_s_at	51030	0.790026	0.013793	0.0794746	-1.13631	0.000955333	0.00799978	4	1.92633	repr
ARMC1	218185_s_at	55156	-0.661183	0.0521335	0.170329	1.26431	0.00201326	0.0143188	1	1.9255	IND
ACP6	218795_at	51205	-0.563259	0.0813907	0.22285	1.3593	0.000618887	0.00575066	1	1.92256	IND
CECR5	218592_s_at	27440	-0.781134	0.0152326	0.0842344	1.1401	0.0448206	0.139706	1	1.92123	IND
PGM3	210041_s_at	5238	1.0552	0.0104042	0.0678882	-0.864892	0.00681296	0.035237	4	1.92009	repr
EXOSC10	207541_s_at	5394	-0.535789	0.0650047	0.196073	1.38219	0.00113306	0.00924589	1	1.91798	IND
ILK	201234_at	3611	0.638879	0.0171727	0.0902788	-1.27898	0.0101714	0.0472875	4	1.91785	repr
TFPT	218996_at	29844	0.872965	0.00705158	0.055932	1.04386	0.0353198	0.118192	2	1.91683	IND
CBR4	213626_at	84869	-0.839186	0.0195294	0.0955443	1.07642	0.00961436	0.0455097	1	1.91561	IND
UTP18	203721_s_at	51096	-0.602416	0.0260098	0.113616	1.3129	0.0836359	0.2178	1	1.91531	IND
RAB5C	201140_s_at	5878	0.493979	0.0505131	0.167175	1.42095	0.000359833	0.00374973	2	1.91493	IND
PCGF2	203793_x_at	7703	1.05801	0.0259382	0.113534	0.856335	0.0392758	0.127835	2	1.91434	IND
MPI	202472_at	4351	-0.810004	0.0156314	0.0853662	1.09603	0.000595897	0.00559752	1	1.90603	IND			MPI
TRAP1	201391_at	10131	-1.00588	0.00886658	0.0629014	0.898964	0.00295998	0.0191365	1	1.90485	IND
RNF38	218528_s_at	152006	0.966716	0.0171487	0.0902788	-0.934859	0.0521218	0.155679	4	1.90158	repr
CSTF1	202190_at	1477	-1.3719	0.00259349	0.0354915	0.529312	0.0514773	0.154213	1	1.90121	IND	CSTF1
RAB5A	209089_at	5868	0.7736	0.00522881	0.047379	-1.12745	0.0105286	0.0485308	4	1.90105	repr
STAM2	209649_at	10254	1.34073	0.000349276	0.0153488	-0.55823	0.0357378	0.119307	4	1.89896	repr
C17orf71	218514_at	55181	-0.546066	0.033872	0.132881	1.35027	6.01613e-05	0.000910053	1	1.89634	IND
HEATR2	218460_at	54919	-0.939923	0.00767288	0.0582841	0.952133	0.000930524	0.00781996	1	1.89206	IND	HEATR2
BIK	213132_s_at	638	-1.03476	0.019309	0.0951548	0.855536	0.0424232	0.135016	1	1.89029	IND
IFT88	204703_at	8100	-0.447369	0.0913797	0.238238	1.44212	0.00315885	0.0201994	1	1.88949	IND
ORC5L	204957_at	5001	-0.622327	0.0704282	0.205046	1.26061	0.00934622	0.0445402	1	1.88294	IND
SND1	201622_at	27044	0.670593	0.0268049	0.115885	1.20947	0.00757193	0.0382347	2	1.88006	IND
TTC15	203122_at	51112	-0.612331	0.0198519	0.096537	1.26742	0.00130954	0.0103304	1	1.87975	IND
PDXDC1	212053_at	23042	0.804101	0.00549253	0.048658	1.07254	0.0123005	0.0545536	2	1.87664	IND
COQ9	212228_s_at	57017	-0.470421	0.0937147	0.242171	1.40587	0.0132279	0.0575062	1	1.87629	IND
ABI2	211793_s_at	10152	-1.28899	0.00117639	0.0250749	0.584376	0.0534212	0.158819	1	1.87337	IND	ABI2
MRPS18B	208907_s_at	28973	-0.795313	0.0260996	0.113815	1.07445	0.00404186	0.0241755	1	1.86977	IND
PIGF	205078_at	5281	-1.14891	0.00133339	0.0262247	0.719837	0.0209666	0.0801954	1	1.86874	IND
DHX30	204355_at	22907	-0.789889	0.00425879	0.0424913	1.07765	0.03618	0.120383	1	1.86754	IND
KIF18A	221258_s_at	81930	-1.398	0.0443802	0.15477	0.469196	0.0395338	0.128325	1	1.8672	IND
NUDT3	221579_s_at	11165	-0.999644	0.0200724	0.0969722	0.867259	0.0479654	0.146182	1	1.8669	IND
MAPK8IP3	213178_s_at	23162	0.837198	0.0030733	0.037727	1.02218	0.055401	0.163119	2	1.85938	IND
NDEL1	208093_s_at	81565	0.69845	0.0465832	0.158907	-1.15194	0.0320003	0.110147	4	1.8504	repr
ITM2B	217731_s_at	9445	0.440404	0.0754022	0.212762	-1.40772	0.0121855	0.05418	4	1.84813	repr
FAM21B	214946_x_at	55747	0.954184	0.00410712	0.0420262	0.886625	0.00784489	0.0393307	2	1.84081	IND
MGRN1	212576_at	23295	0.792579	0.00748283	0.057713	1.0452	0.0826455	0.215867	2	1.83778	IND
SMYD3	218788_s_at	64754	-0.707154	0.0238861	0.108397	-1.12631	0.0657992	0.184837	3	1.83347	repr
MAP4K5	203553_s_at	11183	0.590112	0.0732143	0.209471	-1.2428	0.000876482	0.00750021	4	1.83292	repr
UBE2I	213535_s_at	7329	-0.538751	0.0528777	0.171244	1.29357	0.100954	0.247857	1	1.83232	IND
TICAM2	214658_at	353376	0.543942	0.0439618	0.154037	-1.28622	0.000162384	0.00200308	4	1.83016	repr
SEPT9	208657_s_at	10801	0.615875	0.0651232	0.196347	1.21044	0.00341995	0.0214402	2	1.82631	IND
SAP30	204899_s_at	8819	-0.981452	0.0143514	0.0814754	0.843112	0.000919539	0.00774615	1	1.82456	IND
Magmas	218969_at	51025	-0.652324	0.0519754	0.170329	1.17187	9.92775e-06	0.000201826	1	1.82419	IND
FLJ10038	205510_s_at	55056	-0.469018	0.0564677	0.178957	-1.35355	1.23089e-08	7.66201e-07	3	1.82257	repr
RANBP6	213019_at	26953	0.684738	0.0426277	0.151589	1.13641	0.00312003	0.020024	2	1.82114	IND
CNOT1	200861_at	23019	-0.644252	0.0538425	0.173172	1.17501	0.00542385	0.0300404	1	1.81927	IND	CNOT1
RRP15	219037_at	51018	-0.553627	0.0776367	0.216318	-1.26559	0.00111347	0.00911398	3	1.81922	repr
KIAA0247	202181_at	9766	0.608397	0.066851	0.198913	-1.21074	0.080121	0.211597	4	1.81914	repr
PRKD2	209282_at	25865	0.705427	0.00969187	0.0656925	1.11122	0.0814339	0.213893	2	1.81665	IND
ARL2BP	202092_s_at	23568	0.908262	0.00827997	0.0607313	-0.907037	0.00338261	0.0212727	4	1.8153	repr
ATP8B1	214594_x_at	5205	0.737173	0.0416281	0.149699	1.07374	0.0163537	0.0668789	2	1.81091	IND
NEO1	204321_at	4756	0.779217	0.0460243	0.157932	1.03039	0.0226243	0.0846938	2	1.80961	IND	NEO1
CDK2AP1	201938_at	8099	0.54165	0.038416	0.142897	-1.26643	0.10002	0.246445	4	1.80808	repr
ARL8B	217852_s_at	55207	0.568529	0.0222767	0.103428	-1.23905	0.0899739	0.229386	4	1.80758	repr
LARS2	34764_at	23395	-0.675684	0.0245087	0.109526	1.13178	0.00056995	0.00542108	1	1.80746	IND
STIL	205339_at	6491	-0.955552	0.0126175	0.075891	0.845346	0.0172086	0.0696062	1	1.8009	IND
DALRD3	221934_s_at	55152	-0.662111	0.0746527	0.211908	1.13809	0.00937374	0.0446109	1	1.8002	IND
SDCCAG3	218427_at	10807	-0.888094	0.010024	0.0666437	0.910978	0.0327734	0.112124	1	1.79907	IND
DUS1L	217912_at	64118	-0.888857	0.011203	0.0704626	0.909384	0.0353033	0.118192	1	1.79824	IND	DUS1L
ASXL2	218659_at	55252	0.613119	0.0468191	0.15948	1.18495	0.00282171	0.0184154	2	1.79807	IND
EBP	202735_at	10682	-0.977093	0.00539838	0.0482651	0.819173	0.0371014	0.122752	1	1.79627	IND
TMBIM1	217730_at	64114	0.834059	0.0364004	0.138313	-0.962146	0.0570279	0.166653	4	1.7962	repr
TSR1	218156_s_at	55720	-1.02769	0.00275759	0.0364365	0.766789	0.0990561	0.244821	1	1.79447	IND
ATXN2	202622_s_at	6311	0.714485	0.0103671	0.0677713	1.07748	0.0106407	0.0488556	2	1.79196	IND
DYNC2H1	219469_at	79659	-1.09284	0.0111341	0.0704011	-0.695758	0.0466946	0.14349	3	1.7886	repr
HSPA9	200690_at	3313	1.0132	0.0634422	0.193518	-0.771402	0.0409971	0.131677	4	1.7846	repr
FLJ20628	221229_s_at	55006	-1.26067	0.00169077	0.0288007	0.523523	0.0901228	0.229516	1	1.78419	IND
MAFG	204970_s_at	4097	0.711015	0.0390156	0.144061	-1.07261	0.0121662	0.0541285	4	1.78362	repr
WDR3	218882_s_at	10885	-0.520253	0.0783289	0.2174	1.26125	0.00325669	0.0207496	1	1.7815	IND
SSX2	207493_x_at	6757	-0.841825	0.0332668	0.131165	0.937217	0.0793953	0.210289	1	1.77904	IND	SSX2
DGKZ	207556_s_at	8525	-0.519985	0.0289357	0.120791	1.25473	0.0690767	0.191339	1	1.77471	IND
ZNF211	205437_at	10520	0.861184	0.00744636	0.0575729	0.913106	0.0159176	0.0655912	2	1.77429	IND
AVEN	219366_at	57099	0.844687	0.05212	0.170329	-0.92445	0.00968734	0.0457014	4	1.76914	repr
AGK	218568_at	55750	-0.754427	0.0772094	0.216024	1.01435	0.00403597	0.0241608	1	1.76878	IND
UTP14A	221514_at	10813	-0.642243	0.0125499	0.0756437	1.12385	0.000705471	0.00635376	1	1.7661	IND
RRP1B	212846_at	23076	-0.75116	0.0203825	0.0979071	1.01424	0.0666616	0.186144	1	1.7654	IND
RPL31	200962_at	6160	-0.890725	0.0105133	0.0682198	0.867323	0.0434967	0.136954	1	1.75805	IND
SPR	203458_at	6697	-0.661531	0.0641848	0.194769	1.09572	0.04592	0.141984	1	1.75725	IND
USP14	201671_x_at	9097	0.889747	0.0385517	0.143326	0.864423	0.0958611	0.239024	2	1.75417	IND
DLEU2L	215629_s_at	79469	-0.726443	0.0652943	0.196694	1.02772	0.000742773	0.00657191	1	1.75417	IND
ACAD8	221669_s_at	27034	-0.653204	0.0917404	0.238917	1.09729	0.0177652	0.071365	1	1.7505	IND
MED24	213043_s_at	9862	-0.773454	0.00516674	0.0471985	0.975633	0.0773137	0.206463	1	1.74909	IND
FRAG1	41858_at	27315	-0.57522	0.0862597	0.229743	1.17244	0.000546383	0.00524319	1	1.74765	IND
EIF2B3	218488_at	8891	-0.814663	0.00681639	0.0549932	-0.923844	0.000288603	0.00313277	3	1.73851	repr
FAM21A	212370_x_at	387680	0.969697	0.00225947	0.0327018	0.766897	0.0709995	0.194626	2	1.73659	IND
CCDC88A	221078_s_at	55704	-0.740139	0.0244895	0.109526	0.995944	0.0473842	0.144913	1	1.73608	IND
MRPL13	218049_s_at	28998	-0.423751	0.0873837	0.231335	1.30923	0.00387825	0.0233959	1	1.73298	IND
IMMT	200955_at	10989	-0.501329	0.0563747	0.178944	1.23124	0.0394427	0.128148	1	1.73257	IND
C20orf19	219961_s_at	55857	-0.71225	0.0664977	0.19832	1.0195	0.0269624	0.0963082	1	1.73175	IND
FNTA	209471_s_at	2339	-0.482229	0.0664773	0.19832	1.24727	0.00568984	0.0310974	1	1.7295	IND
ASXL1	212238_at	171023	-0.634808	0.0783493	0.2174	-1.09131	0.00854253	0.0417569	3	1.72612	repr
MPHOSPH6	203740_at	10200	-0.581108	0.0907728	0.237099	1.14307	0.00788313	0.0394661	1	1.72418	IND	MPHOSPH6
KIAA0133	205284_at	9816	-1.2648	0.00315995	0.0381909	-0.457679	0.0555257	0.163417	3	1.72248	repr
PLA2G4A	210145_at	5321	-0.683854	0.0980208	0.248909	-1.03658	5.01704e-05	0.000791252	3	1.72044	repr
MEPCE	219798_s_at	56257	-0.741898	0.0368118	0.139101	0.978349	0.0220414	0.0833097	1	1.72025	IND
RBPJ	211974_x_at	3516	0.642231	0.0531689	0.171996	-1.07773	0.0204704	0.0791146	4	1.71996	repr
CUL1	207614_s_at	8454	-0.683301	0.0159691	0.0862722	1.03642	0.100212	0.246812	1	1.71972	IND	CUL1
TOM1L1	204485_s_at	10040	-0.632067	0.0476737	0.161453	1.08732	0.00427531	0.0251442	1	1.71938	IND
POLR2I	212955_s_at	5438	-0.808681	0.0108381	0.0694942	0.909752	0.0994534	0.245544	1	1.71843	IND
MYOM1	205610_at	8736	1.05646	0.0396619	0.145152	-0.659025	0.0975781	0.241763	4	1.71548	repr
CXorf40B	212961_x_at	541578	0.907284	0.00329435	0.038796	-0.804059	0.0411001	0.131828	4	1.71134	repr
PRAF2	203456_at	11230	0.913709	0.0505703	0.167236	0.797125	0.0500825	0.150999	2	1.71083	IND
ARGLU1	218067_s_at	55082	-0.65676	0.0368119	0.139101	1.0517	0.0904257	0.229872	1	1.70846	IND
ZNF335	221890_at	63925	-0.83255	0.0429267	0.152252	0.874957	0.0159911	0.0658558	1	1.70751	IND
C1orf41	203960_s_at	51668	-0.600169	0.0444737	0.154865	1.10637	0.000472303	0.00463992	1	1.70654	IND
FAM128B	220720_x_at	80097	0.692733	0.0447622	0.155311	1.01239	0.00750351	0.0379437	2	1.70513	IND
DCLRE1B	219490_s_at	64858	-1.30336	0.00391588	0.0419118	0.400168	0.074428	0.200875	1	1.70353	IND	DCLRE1B
CLTC	200614_at	1213	0.50256	0.0746012	0.211847	1.19507	0.0264227	0.0951078	2	1.69763	IND
MAN2B2	214703_s_at	23324	0.699542	0.0479422	0.16205	-0.997514	0.0161117	0.0661585	4	1.69706	repr
RPL28	213223_at	6158	-0.909496	0.00758845	0.058145	0.784534	0.0348684	0.117071	1	1.69403	IND
NANS	218189_s_at	54187	0.802363	0.0533583	0.172403	-0.89082	0.097059	0.240763	4	1.69318	repr
FTHP1	211628_x_at	2509	1.0389	0.0045559	0.043998	-0.653414	0.0544234	0.160779	4	1.69231	repr
TMED3	208837_at	23423	0.654474	0.0305552	0.124949	-1.03689	0.0950402	0.23761	4	1.69136	repr
KLC1	213656_s_at	3831	0.732454	0.070119	0.204401	-0.958514	0.0918409	0.23221	4	1.69097	repr
RND2	213467_at	8153	-0.565707	0.078621	0.217725	1.12505	0.00802588	0.0399251	1	1.69076	IND
ASH2L	209517_s_at	9070	-0.674216	0.0629607	0.192802	1.0157	0.0221448	0.0834316	1	1.68992	IND
DCK	203302_at	1633	-0.712633	0.02935	0.122125	0.975638	0.0708016	0.194401	1	1.68827	IND
RDBP	209219_at	7936	-0.478093	0.0808726	0.222049	1.20218	0.0841167	0.218492	1	1.68028	IND	RDBP		RDBP
BICD2	213154_s_at	23299	0.62112	0.0961858	0.245758	-1.0567	0.0807758	0.212482	4	1.67782	repr
FAM128A	213166_x_at	653784	-0.480969	0.0905851	0.237099	1.19376	0.0605344	0.174005	1	1.67473	IND
C11orf24	52164_at	53838	0.710568	0.0907745	0.237099	-0.96403	0.00044534	0.00443072	4	1.6746	repr
HINT1	200093_s_at	3094	-0.570094	0.0230879	0.105523	1.10105	0.0102998	0.0477266	1	1.67115	IND
FAM89B	32209_at	23625	0.707913	0.0521094	0.170329	0.951734	0.0354678	0.118518	2	1.65965	IND
THADA	220212_s_at	63892	-1.09039	0.00176284	0.029314	0.569214	0.0324977	0.111363	1	1.65961	IND
GMCL1	218458_at	64395	-0.711327	0.0248636	0.110327	0.947935	0.0461198	0.142436	1	1.65926	IND
PPAT	209433_s_at	5471	-0.692574	0.0462577	0.158261	0.961338	0.0300322	0.10515	1	1.65391	IND
NOC2L	202115_s_at	26155	-0.662532	0.0931878	0.241164	0.9911	0.00466626	0.0268597	1	1.65363	IND
SEC22B	209207_s_at	9554	0.848322	0.014957	0.0830661	-0.804079	0.000430163	0.00429796	4	1.6524	repr
NDUFB1	206790_s_at	4707	-0.73783	0.0100203	0.0666437	0.914183	0.0182813	0.0727985	1	1.65201	IND
TOMM22	217960_s_at	56993	-0.433395	0.0724463	0.20791	1.21733	0.00923205	0.0440857	1	1.65072	IND
HGS	210428_s_at	9146	0.451781	0.0711853	0.20608	1.19774	0.0508746	0.152732	2	1.64952	IND
ATR	209903_s_at	545	-0.763824	0.0329511	0.130464	0.87978	0.0865387	0.22289	1	1.6436	IND
CEP192	218827_s_at	55125	-0.700082	0.0114417	0.0711966	0.941884	0.0264916	0.0951553	1	1.64197	IND
NDUFC1	203478_at	4717	-0.710005	0.0087364	0.0622612	0.93116	0.049387	0.149672	1	1.64117	IND
NDUFV2	202941_at	4729	-0.390111	0.0868169	0.230188	1.24891	0.0156263	0.0648813	1	1.63902	IND
RFWD3	218564_at	55159	-0.772613	0.0565149	0.178985	0.866203	0.0198903	0.0776837	1	1.63882	IND
HADHA	208629_s_at	3030	-0.584699	0.0745688	0.211841	1.04699	0.0232894	0.0865518	1	1.63168	IND
ZNF710	213542_at	374655	-0.645383	0.0245292	0.109548	0.984673	0.00818017	0.0404367	1	1.63006	IND
ABCE1	201872_s_at	6059	-0.604443	0.0174697	0.0909562	1.01894	0.0836644	0.2178	1	1.62339	IND
CAND1	208838_at	55832	-0.472701	0.0822561	0.223826	1.14765	0.00434603	0.0254537	1	1.62036	IND
EIF3A	200597_at	8661	-0.721689	0.0126733	0.0760189	0.897308	0.0453317	0.140814	1	1.619	IND
MARK3	202568_s_at	4140	-0.697068	0.0309587	0.125668	0.918881	0.0271183	0.0965824	1	1.61595	IND
IFT81	219372_at	28981	-0.780043	0.034953	0.135508	0.830786	0.00139131	0.0107448	1	1.61083	IND
RPL29	200823_x_at	6159	-0.418382	0.0870059	0.230508	1.19113	0.091696	0.232094	1	1.60951	IND
BAX	211833_s_at	581	-0.649701	0.0639135	0.19445	0.959727	0.0385685	0.126064	1	1.60943	IND
MAD2L1BP	203094_at	9587	-1.04871	0.0193583	0.0951548	0.559666	0.0788681	0.209422	1	1.60837	IND	MAD2L1BP
C2orf43	222192_s_at	60526	-0.778787	0.0165641	0.0884674	0.828953	0.0178746	0.0716446	1	1.60774	IND
PTGS1	205128_x_at	5742	-0.534446	0.0295094	0.122388	-1.07075	0.0762071	0.204596	3	1.60519	repr		PTGS1
TMEM70	219448_at	54968	-1.08799	0.00887094	0.0629014	0.517184	0.0409393	0.131552	1	1.60517	IND	TMEM70
SPAG7	200053_at	9552	-0.669465	0.0527962	0.171214	0.93416	0.0133763	0.0579366	1	1.60362	IND
INTS9	203941_at	55756	-0.632197	0.0773688	0.216215	0.96941	0.0107385	0.0492722	1	1.60161	IND
THOP1	203235_at	7064	-0.910445	0.00938679	0.0647956	0.686751	0.0248106	0.0911321	1	1.5972	IND
PRR14	218714_at	78994	-0.53881	0.0757911	0.213417	1.05532	0.00949085	0.0450767	1	1.59413	IND
SHQ1	219083_at	55164	-0.80106	0.0267091	0.115629	0.785535	0.0460938	0.142436	1	1.58659	IND
STX4	203530_s_at	6810	0.63829	0.0388078	0.143821	-0.945374	0.0763227	0.204737	4	1.58366	repr
UBP1	218082_s_at	7342	0.473632	0.0822516	0.223826	1.10861	0.0823053	0.215378	2	1.58225	IND
SCRIB	212556_at	23513	-0.798285	0.0522077	0.170329	0.783291	0.0130088	0.0568347	1	1.58158	IND
C19orf54	222052_at	284325	-0.598823	0.0431103	0.152684	0.980126	0.00450167	0.0262125	1	1.57895	IND
OSGEP	209450_at	55644	-0.936146	0.0231785	0.105869	0.640747	0.0649959	0.183239	1	1.57689	IND
FDPS	201275_at	2224	-0.776734	0.045289	0.156465	0.796117	0.100575	0.247331	1	1.57285	IND
GMPS	214431_at	8833	-0.649304	0.0144768	0.0815944	0.922353	0.0819659	0.214809	1	1.57166	IND	GMPS
POLE3	208828_at	54107	-0.534346	0.0521526	0.170329	-1.0354	0.0778429	0.207483	3	1.56975	repr
MRPL11	219162_s_at	65003	-0.901237	0.00515397	0.0471985	0.665408	0.0645688	0.182327	1	1.56664	IND
C2orf3	216305_s_at	6936	-0.880523	0.00712219	0.0561631	0.685911	0.0328997	0.112427	1	1.56643	IND
MFGE8	210605_s_at	4240	0.629062	0.0654992	0.196941	-0.934613	0.0146699	0.0616784	4	1.56368	repr
BRCA1	204531_s_at	672	-0.654311	0.0618414	0.190119	0.903103	0.00583583	0.0315036	1	1.55741	IND
COQ3	221227_x_at	51805	-1.05294	0.0193129	0.0951548	0.500543	0.0453608	0.140814	1	1.55348	IND
KIAA0406	212898_at	9675	-0.751445	0.0239976	0.108795	0.800602	0.0267	0.0956514	1	1.55205	IND
NCOA1	209107_x_at	8648	0.807378	0.0339856	0.133178	-0.743848	0.0674448	0.187884	4	1.55123	repr		NCOA1
SPATA5L1	222163_s_at	79029	-0.766201	0.0767009	0.215375	0.784012	0.0340345	0.114985	1	1.55021	IND
ATP5O	200818_at	539	-0.668195	0.0184079	0.0931519	0.879066	0.0447845	0.139696	1	1.54726	IND
MRPL46	219244_s_at	26589	-0.547126	0.082566	0.224495	0.995331	0.00109608	0.00900679	1	1.54246	IND
ERF	203643_at	2077	-0.471864	0.0838691	0.226289	1.07046	0.00200179	0.0142516	1	1.54232	IND
PIK3CA	204369_at	5290	0.688462	0.0347821	0.135095	-0.847897	0.0702526	0.193408	4	1.53636	repr
CDIPT	201253_s_at	10423	0.505114	0.0374163	0.140476	-1.02498	0.0127213	0.0559259	4	1.5301	repr
LAMC2	202267_at	3918	0.420161	0.0891255	0.234271	-1.10961	0.0305789	0.106428	4	1.52977	repr
COX5A	203663_s_at	9377	-0.481154	0.0828148	0.224737	1.04581	0.0952383	0.237724	1	1.52696	IND
KLHL9	213233_s_at	55958	0.616333	0.0200136	0.0968862	0.910444	0.0102356	0.0475206	2	1.52678	IND
WASL	205809_s_at	8976	0.731009	0.0214813	0.101409	-0.787546	0.0630773	0.178905	4	1.51855	repr
EIF3EIP	217719_at	51386	-0.617307	0.0330453	0.130712	0.89511	0.0629116	0.178724	1	1.51242	IND
YRDC	218647_s_at	79693	0.857211	0.0767412	0.215402	-0.655054	0.0714906	0.195515	4	1.51226	repr
PSMC2	201067_at	5701	0.872681	0.0380832	0.14211	-0.635596	0.0373635	0.123387	4	1.50828	repr			PSMC2
MBTPS1	201620_at	8720	0.51142	0.088835	0.234017	-0.996172	0.0105694	0.0486552	4	1.50759	repr
LASS6	212442_s_at	253782	0.536707	0.0460575	0.157932	0.967711	0.0902604	0.2297	2	1.50442	IND
PTMS	218045_x_at	5763	-0.785522	0.0711786	0.20608	0.715172	0.0824023	0.215445	1	1.50069	IND
SLC7A8	216604_s_at	23428	-0.640656	0.0519836	0.170329	0.857072	0.0910639	0.231243	1	1.49773	IND
ACVR2B	220028_at	93	-0.888405	0.0109064	0.069678	0.608948	0.0437615	0.137665	1	1.49735	IND
PTGES2	218083_at	80142	-0.60604	0.0527964	0.171214	0.88882	0.07445	0.200875	1	1.49486	IND
ATOX1	203454_s_at	475	0.627808	0.0347666	0.135095	0.857713	0.0412411	0.13222	2	1.48552	IND
AZIN1	201772_at	51582	0.567317	0.0878638	0.232169	-0.917209	0.0849508	0.22001	4	1.48453	repr
RPSA	213801_x_at	3921	-0.542918	0.0307871	0.125395	0.93782	0.0548218	0.16182	1	1.48074	IND
CCPG1	221511_x_at	9236	0.506835	0.0631786	0.192963	-0.971807	0.00658041	0.0343156	4	1.47864	repr
TMEM177	218897_at	80775	-1.10877	0.0313194	0.12661	0.36611	0.0586831	0.170007	1	1.47489	IND
CEP110	205642_at	11064	-0.769431	0.0302462	0.124126	0.70287	0.0996654	0.245981	1	1.4723	IND
NFE2L1	200759_x_at	4779	0.732602	0.0175283	0.0909794	-0.732911	0.0376375	0.124059	4	1.46551	repr
HIRIP3	204504_s_at	8479	-0.940595	0.0510913	0.168247	0.519052	0.019779	0.0775436	1	1.45965	IND
RAD17	210826_x_at	5884	-0.628541	0.0550269	0.176016	0.82792	0.0492177	0.149287	1	1.45646	IND
SLC4A7	207604_s_at	9497	0.512835	0.0521873	0.170329	-0.94252	0.00330743	0.0209779	4	1.45535	repr
LUZP1	221832_s_at	7798	0.793977	0.0274254	0.117413	-0.656748	0.0949498	0.237594	4	1.45072	repr
CTTN	214074_s_at	2017	1.04048	0.0185152	0.0932063	-0.405714	0.0612141	0.175121	4	1.44619	repr
RPS9	217747_s_at	6203	-0.446548	0.0890796	0.234238	0.998125	0.100261	0.246845	1	1.44467	IND
C2orf44	219120_at	80304	-0.980842	0.00550412	0.0486993	0.46048	0.0161801	0.0663235	1	1.44132	IND
SFRS17A	210269_s_at	8227	0.663528	0.02234	0.103654	0.775886	0.0930804	0.233998	2	1.43941	IND
KIAA0831	204568_at	22863	0.566257	0.0489095	0.163902	-0.872252	0.0161089	0.0661585	4	1.43851	repr
TCTN3	212121_at	26123	0.608544	0.036436	0.138313	-0.828793	0.026453	0.0951078	4	1.43734	repr
CCDC41	219644_at	51134	-0.696001	0.0376001	0.14098	0.740289	0.00176432	0.0128737	1	1.43629	IND
RAB22A	218360_at	57403	0.596607	0.0420623	0.150338	-0.833633	0.00818047	0.0404367	4	1.43024	repr
RPL13	208929_x_at	6137	-0.423945	0.0831716	0.225271	1.00439	0.0405809	0.130759	1	1.42833	IND	RPL13
KLHL18	212882_at	23276	0.88387	0.0228208	0.104848	-0.535306	0.0790345	0.209705	4	1.41918	repr
POMT1	218476_at	10585	0.730427	0.0462112	0.158252	0.688367	0.0456103	0.141394	2	1.41879	IND
HEMK1	218620_s_at	51409	-0.63932	0.0642459	0.194871	0.777952	0.0546307	0.161324	1	1.41727	IND
BRF2	218955_at	55290	0.578726	0.0938699	0.242216	0.836845	0.0132253	0.0575062	2	1.41557	IND
ABCC4	203196_at	10257	-0.751182	0.0673783	0.19999	0.658617	0.0844787	0.21919	1	1.4098	IND
TMED7	209404_s_at	51014	0.645195	0.0281761	0.119105	-0.763522	0.0630423	0.178878	4	1.40872	repr
COQ7	209746_s_at	10229	-0.949791	0.00296254	0.0370792	0.45606	0.0845422	0.219273	1	1.40585	IND
ARL3	202641_at	403	-0.58132	0.0473931	0.16089	0.817102	0.0384049	0.125764	1	1.39842	IND
TAF5L	213654_at	27097	-0.938127	0.00992321	0.0664053	-0.457701	0.0159148	0.0655912	3	1.39583	repr
COBRA1	202757_at	25920	-0.541781	0.0356878	0.137249	0.847782	0.0616148	0.175964	1	1.38956	IND
ZFP36L1	211965_at	677	0.506539	0.0986226	0.249885	0.875746	0.0445852	0.139505	2	1.38228	IND
PCCA	203860_at	5095	-0.493761	0.0698377	0.204152	0.886528	0.0168946	0.0686359	1	1.38029	IND	PCCA
EDF1	209058_at	8721	0.634961	0.0357991	0.137526	0.74512	0.0387271	0.126407	2	1.38008	IND
PLCG1	202789_at	5335	0.482489	0.0986617	0.249885	0.897019	0.0253345	0.0924133	2	1.37951	IND
ANKRD10	215504_x_at	55608	0.782519	0.0444963	0.154868	0.596254	0.0159022	0.0655912	2	1.37877	IND
MAGT1	221553_at	84061	0.564574	0.0777132	0.216318	-0.80955	0.0112095	0.0508365	4	1.37412	repr
PTPRU	211320_s_at	10076	-0.676087	0.0310645	0.125869	0.691566	0.0817696	0.214535	1	1.36765	IND
SIRT5	219185_at	23408	-0.846263	0.0494996	0.164936	0.517958	0.0632029	0.179117	1	1.36422	IND
PEX7	211033_s_at	5191	-0.962734	0.0184476	0.0932063	-0.397954	0.0786402	0.209053	3	1.36069	repr
NR2C1	204791_at	7181	0.759719	0.0158169	0.0859734	-0.596147	0.100029	0.246445	4	1.35587	repr
CPSF6	202470_s_at	11052	-0.751959	0.0076329	0.0581688	0.597846	0.064711	0.182655	1	1.34981	IND
C9orf82	219276_x_at	79886	-0.783671	0.0177027	0.0912861	0.566112	0.0659669	0.185061	1	1.34978	IND
ZBTB5	203026_at	9925	0.509016	0.0787541	0.217832	-0.840436	0.0152309	0.0635813	4	1.34945	repr
RNGTT	204207_s_at	8732	-0.993246	0.0193534	0.0951548	-0.355415	0.0154092	0.0642288	3	1.34866	repr
ROD1	214697_s_at	9991	0.657505	0.0456962	0.157401	-0.689904	0.0617911	0.176252	4	1.34741	repr
GADD45GIP1	212891_s_at	90480	-0.581248	0.0368221	0.139101	0.760769	0.0314363	0.108892	1	1.34202	IND
AP1G1	203350_at	164	0.748718	0.0359483	0.137774	-0.591952	0.0528001	0.157304	4	1.34067	repr
ZNF273	215239_x_at	10793	-0.859265	0.0645084	0.19533	0.479395	0.10073	0.247566	1	1.33866	IND
FAM119B	213861_s_at	25895	0.494944	0.0640061	0.194534	-0.840738	0.020146	0.0783343	4	1.33568	repr
METTL8	220007_at	79828	-0.75964	0.0304694	0.124823	0.574031	0.0518571	0.15502	1	1.33367	IND
WDR79	44563_at	55135	-0.884891	0.0301716	0.123893	0.444055	0.070064	0.192976	1	1.32895	IND
GTDC1	219770_at	79712	-0.525512	0.0827745	0.224715	0.802325	0.037287	0.12325	1	1.32784	IND
SSBP2	203787_at	23635	-0.485138	0.0977514	0.248584	-0.84207	0.0396899	0.128641	3	1.32721	repr
HNRPDL	209068_at	9987	-0.525604	0.0430411	0.152519	0.80018	0.0913409	0.231528	1	1.32578	IND
CCT7	200812_at	10574	-0.422761	0.071081	0.20608	0.902764	0.0849791	0.22001	1	1.32553	IND
SKIV2L2	212896_at	23517	-0.435896	0.0643739	0.195175	0.881037	0.0291574	0.102598	1	1.31693	IND
ECSIT	218225_at	51295	-0.46758	0.0667447	0.19868	0.840322	0.0269752	0.0963082	1	1.3079	IND
INHBC	207688_s_at	3626	-0.45737	0.0626507	0.192103	0.849021	0.0244216	0.0898908	1	1.30639	IND
TMEM186	204676_at	25880	-0.647272	0.0375401	0.14083	0.652384	0.00454681	0.0263663	1	1.29966	IND
HARS2	209252_at	23438	0.579513	0.0613269	0.189365	0.717748	0.018758	0.0741258	2	1.29726	IND
GLT8D1	218146_at	55830	-0.51394	0.0589892	0.184413	-0.782178	0.000334193	0.00354023	3	1.29612	repr
ABCD4	203981_s_at	5826	0.387369	0.0854047	0.228504	0.906843	0.00874326	0.0423263	2	1.29421	IND
FKBP14	219390_at	55033	0.432451	0.0926378	0.240094	-0.858576	0.00561191	0.0307671	4	1.29103	repr
KIF24	46270_at	347240	0.50602	0.0438809	0.154037	-0.781933	0.00520197	0.0292025	4	1.28795	repr
PUS3	221277_s_at	83480	0.790664	0.0180797	0.0922565	0.492071	0.0320363	0.110147	2	1.28274	IND
SIP1	211114_x_at	8487	-0.724155	0.0978229	0.248676	0.557804	0.0392314	0.127756	1	1.28196	IND
GALE	202528_at	2582	-0.549572	0.0699306	0.204189	0.730802	0.0942691	0.236062	1	1.28037	IND
RAB35	221819_at	11021	0.51438	0.0395666	0.144962	-0.751117	0.0869074	0.223594	4	1.2655	repr
PAK1IP1	218886_at	55003	-0.607092	0.0386977	0.143717	0.652607	0.0767713	0.205639	1	1.2597	IND
UBTF	214881_s_at	7343	-0.82389	0.0459475	0.157887	0.433737	0.0613026	0.175286	1	1.25763	IND
PRPF3	202251_at	9129	0.600203	0.0901175	0.23626	0.657092	0.0611264	0.175066	2	1.2573	IND
BCR	202315_s_at	613	0.512975	0.0816391	0.223007	0.736776	0.0687274	0.190702	2	1.24975	IND
WDR77	201421_s_at	79084	-0.456206	0.073318	0.209471	0.792821	3.10613e-05	0.000527347	1	1.24903	IND	WDR77
LGR4	218326_s_at	55366	0.540026	0.07413	0.21102	-0.708419	0.0319384	0.110147	4	1.24845	repr			LGR4
POLE	216026_s_at	5426	-0.571404	0.0535808	0.172884	0.673855	0.0336246	0.114064	1	1.24526	IND
DAXX	201763_s_at	1616	-0.535751	0.0879277	0.232251	0.701774	0.0418834	0.133974	1	1.23752	IND			DAXX
EIF4E2	209393_s_at	9470	0.457189	0.0696363	0.203668	-0.775001	0.0462014	0.142473	4	1.23219	repr
LIFR	205876_at	3977	-0.617317	0.058226	0.182758	0.614745	0.0308642	0.107368	1	1.23206	IND
C8orf79	214796_at	57604	-0.477563	0.0660731	0.197854	0.75406	0.0369665	0.122452	1	1.23162	IND
GPS1	217782_s_at	2873	-0.630961	0.0298527	0.123047	0.600309	0.0968281	0.240748	1	1.23127	IND
SFT2D2	214838_at	375035	-0.508507	0.0479996	0.162132	-0.715391	0.00996298	0.0466581	3	1.2239	repr
ITSN1	209298_s_at	6453	-0.584235	0.046894	0.159658	0.62828	0.0222774	0.0837965	1	1.21251	IND
CLCN7	38069_at	1186	0.661419	0.0131333	0.0777314	0.550826	0.0934153	0.234589	2	1.21224	IND
TTC13	219481_at	79573	-0.696772	0.0217416	0.102158	0.506564	0.0650682	0.183369	1	1.20334	IND
EXOSC4	91684_g_at	54512	-0.503634	0.0859388	0.22919	0.697015	0.0329099	0.112427	1	1.20065	IND			EXOSC4
PSIP1	210758_at	11168	-0.750194	0.0189783	0.0945423	0.449416	0.0795828	0.210683	1	1.19961	IND
ARFIP1	214483_s_at	27236	0.618625	0.0209929	0.099908	-0.577849	0.022404	0.0840927	4	1.19647	repr
NUP160	212709_at	23279	-0.619006	0.0734552	0.209693	0.57624	0.0421076	0.134446	1	1.19525	IND
TATDN2	203648_at	9797	-0.464008	0.0630955	0.192926	0.716983	0.0221294	0.0834316	1	1.18099	IND
TELO2	34260_at	9894	-0.542127	0.0416736	0.149786	0.634334	0.00619478	0.0328613	1	1.17646	IND
ZNF189	207513_s_at	7743	0.521752	0.035356	0.136495	0.647434	0.0119508	0.0534745	2	1.16919	IND
CDC2L5	207319_s_at	8621	-0.437819	0.0641317	0.194692	0.726322	0.00939181	0.0446365	1	1.16414	IND			CDC2L5
MAPK7	207292_s_at	5598	0.616304	0.0695763	0.203617	0.522185	0.0130609	0.056956	2	1.13849	IND
C19orf2	211563_s_at	8725	-0.612152	0.0179159	0.0917846	0.510683	0.0112595	0.0509977	1	1.12284	IND
HSF2BP	222096_x_at	11077	-0.473847	0.0922122	0.239751	-0.639224	0.0700685	0.192976	3	1.11307	repr
PTK7	207011_s_at	5754	0.575526	0.0731014	0.209363	0.529305	0.0630006	0.178832	2	1.10483	IND
MIZF	206495_s_at	25988	0.786397	0.0865867	0.229831	0.310126	0.0935609	0.234787	2	1.09652	IND
DENND4C	205684_s_at	55667	0.529612	0.070686	0.205542	-0.548668	0.0158042	0.0652771	4	1.07828	repr
MTMR14	222143_s_at	64419	0.393597	0.0865847	0.229831	0.676823	0.0897098	0.228892	2	1.07042	IND
PRKD3	211084_x_at	23683	-0.515579	0.0516276	0.169616	-0.550291	0.0718677	0.196118	3	1.06587	repr
RPL18A	217313_at	6142	-0.569062	0.0563236	0.178862	0.488326	0.0946556	0.236942	1	1.05739	IND
DHX35	218579_s_at	60625	-0.593317	0.0496839	0.165302	0.455193	0.0431092	0.136283	1	1.04851	IND
APOO	221620_s_at	79135	-0.401074	0.0852309	0.228473	0.63267	0.0510066	0.152998	1	1.03374	IND
FNDC3A	215910_s_at	22862	0.689158	0.054638	0.17525	-0.332832	0.0992336	0.245174	4	1.02199	repr
SGTA	201396_s_at	6449	0.580574	0.0738916	0.210682	0.42057	0.00151233	0.0114443	2	1.00114	IND
C19orf24	221587_s_at	55009	-0.435263	0.0836182	0.226045	0.56124	0.00883084	0.0426043	1	0.996503	IND
FLJ11184	218513_at	55319	-0.454497	0.0865408	0.229831	0.536358	0.068362	0.189837	1	0.990855	IND
MON2	212754_s_at	23041	0.490918	0.0775052	0.216318	-0.487754	0.0959122	0.239067	4	0.978673	repr
VPS52	214585_s_at	6293	-0.461056	0.0966884	0.246326	0.480363	0.0608379	0.174524	1	0.941419	IND
NCAPH2	205086_s_at	29781	-0.554128	0.0612807	0.189328	0.367112	0.0193878	0.0762291	1	0.921241	IND
TSFM	214331_at	10102	-0.571615	0.0407267	0.147971	0.325399	0.0699248	0.192976	1	0.897014	IND
HTF9C	218475_at	27037	-0.500378	0.0810208	0.222357	0.396437	0.0974523	0.241536	1	0.896815	IND
RPUSD2	221940_at	27079	-0.455861	0.0964176	0.245919	0.424238	0.00623465	0.0329779	1	0.880098	IND
RNF7	218286_s_at	9616	0.400432	0.0920459	0.23953	-0.415165	0.0587633	0.170169	4	0.815597	repr

## Sheet: explanation of fields
Gene_Symbol	Official Gene Symbol
affyID_hgu133a	Affymetrix probeset IDs on HG-U133-A array
EntrezGeneID	Gene ID in NCBI Entrez Gene
deltaKD	log2 foldchange of EWS-FLI1 knock down vs. control (mean of 5 cell lines)
P.Value.KD	P value of moderated one-sampple t-test of deltaKD (BioC package limma)
adj.P.Val.KD	Benjamini-Hochberg corrected P value of moderated one-sampple t-test of deltaKD (BioC package limma)
deltaET	log2 foldchange of ESFT vs. MSC
P.Value.ET	P value of moderated two-sampple t-test of deltaET (BioC package limma)
adj.P.Val.ET	Benjamini-Hochberg corrected P value of moderated two-sampple t-test of deltaET (BioC package limma)
quad	Quadrant in plot (Fig.2) deltaKD-deltaET: 1=upper left, 2=upper right, 3=lower left, 4=lower right
deltaSum	sum of the absolute values of deltaKD+deltaET
EWS-FLI1 induced or repressed	indicator whether gene is induced or repressed in ESFT vs. MSC
HancockUP	matching gene symbol from the Hancock 2007 paper - supl. Table7-EWS-FLI1 upregulated genes
HancockDOWN	matching gene symbol from the Hancock 2007 paper - supl. Table8-EWS-FLI1 downregulated genes
GangwalChIP	matching gene symbol from the Gangwal 2008 paper -supl. Table1
